# Supplementary material for: Predicting the past and future evolutionary space of SARS-CoV-2
Source: Research Square preprint supplement (doi:10.21203/rs.3.rs-3195284/v1), 2023-08-14
Supplement: Supplementary file 2 [file 62601f69378011a7a3ef4a1e.xlsx]

## Sheet: Supplementary Information 1
Variant	Pango lineage	Mutation	Cluster number in the cluster model for the months analyzed
			1-3	1-6	1-9	1-12	1-34
Alpha	B.1.1.7	N501Y	1	1	1	2	4
Alpha	B.1.1.7	A570D	4	2	2	2	2
Alpha	B.1.1.7	D614G	3	3	3	3	3
Alpha	B.1.1.7	P681H	1	3	3	2	4
Alpha	B.1.1.7	T716I	2	4	3	3	3
Alpha	B.1.1.7	S982A	1	1	2	2	4
Alpha	B.1.1.7	D1118H	1	2	2	2	2
Beta	B.1.351	D80A	2	3	3	3	3
Beta	B.1.351	D215G	3	3	2	3	3
Beta	B.1.351	K417N	4	4	4	2	3
Beta	B.1.351	E484K	3	2	4	2	4
Beta	B.1.351	N501Y	1	1	1	2	4
Beta	B.1.351	D614G	3	3	3	3	3
Beta	B.1.351	A701V	3	4	3	2	3
Gamma	P.1	L18F	2	3	3	3	3
Gamma	P.2	T20N	2	4	2	3	3
Gamma	P.3	P26S	3	3	3	3	3
Gamma	P.4	D138Y	2	3	3	3	3
Gamma	P.5	R190S	1	1	2	2	4
Gamma	P.6	K417T	4	4	4	2	3
Gamma	P.7	E484K	3	2	4	2	4
Gamma	P.8	N501Y	1	1	1	2	4
Gamma	P.9	D614G	3	3	3	3	3
Gamma	P.10	H655Y	2	3	3	3	3
Gamma	P.11	T1027I	2	4	3	3	4
Gamma	P.12	V1176F	1	2	2	3	3
Delta	B.1.617.2	T19R	2	4	3	3	3
Delta	B.1.617.2	G142D	2	3	3	3	3
Delta	B.1.617.2	R158G	4	3	2	3	4
Delta	B.1.617.2	A222V	3	4	3	2	3
Delta	B.1.617.2	L452R	1	1	2	2	2
Delta	B.1.617.2	T478K	2	4	3	3	4
Delta	B.1.617.2	D614G	3	3	3	3	3
Delta	B.1.617.2	P681R	1	3	3	2	4
Delta	B.1.617.2	D950N	4	2	2	2	4
Omicron	BA.1	A67V	3	4	3	3	3
Omicron	BA.1	T95I	2	3	3	3	3
Omicron	BA.1	Y145D	3	3	3	3	3
Omicron	BA.1	L212I	1	2	1	1	2
Omicron	BA.1	G339D	1	1	4	2	2
Omicron	BA.1	S371L	1	1	1	1	2
Omicron	BA.1	S373P	1	2	2	2	2
Omicron	BA.1	S375F	1	2	1	1	2
Omicron	BA.1	K417N	4	4	4	2	3
Omicron	BA.1	N440K	1	1	2	2	4
Omicron	BA.1	G446S	4	3	3	3	3
Omicron	BA.1	S477N	3	2	2	2	3
Omicron	BA.1	T478K	2	4	3	3	4
Omicron	BA.1	E484A	3	2	4	2	4
Omicron	BA.1	Q493R	1	1	1	1	2
Omicron	BA.1	G496S	1	1	1	2	2
Omicron	BA.1	Q498R	1	1	1	1	2
Omicron	BA.1	N501Y	1	1	1	2	4
Omicron	BA.1	Y505H	1	1	1	2	2
Omicron	BA.1	T547K	4	3	3	3	3
Omicron	BA.1	D614G	3	3	3	3	3
Omicron	BA.1	H655Y	2	3	3	3	3
Omicron	BA.1	N679K	1	1	2	2	2
Omicron	BA.1	P681H	1	3	3	2	4
Omicron	BA.1	N764K	1	2	2	2	2
Omicron	BA.1	D796Y	3	4	4	2	4
Omicron	BA.1	N856K	1	1	4	1	2
Omicron	BA.1	Q954H	1	1	1	2	4
Omicron	BA.1	N969K	1	1	1	2	1
Omicron	BA.1	L981F	1	1	4	1	2
Omicron	BA.2	T19I	2	4	3	3	3
Omicron	BA.2	A27S	4	3	3	3	3
Omicron	BA.2	G142D	2	3	3	3	3
Omicron	BA.2	V213G	3	4	3	3	3
Omicron	BA.2	G339D	1	1	4	2	2
Omicron	BA.2	S371F	1	1	1	1	2
Omicron	BA.2	S373P	1	2	2	2	2
Omicron	BA.2	S375F	1	2	1	1	2
Omicron	BA.2	T376A	1	1	1	2	2
Omicron	BA.2	D405N	1	1	1	1	2
Omicron	BA.2	R408S	2	4	3	3	3
Omicron	BA.2	K417N	4	4	4	2	3
Omicron	BA.2	N440K	1	1	2	2	4
Omicron	BA.2	S477N	3	2	2	2	3
Omicron	BA.2	T478K	2	4	3	3	4
Omicron	BA.2	E484A	3	2	4	2	4
Omicron	BA.2	Q493R	1	1	1	1	2
Omicron	BA.2	Q498R	1	1	1	1	2
Omicron	BA.2	N501Y	1	1	1	2	4
Omicron	BA.2	Y505H	1	1	1	2	2
Omicron	BA.2	D614G	3	3	3	3	3
Omicron	BA.2	H655Y	2	3	3	3	3
Omicron	BA.2	N679K	1	1	2	2	2
Omicron	BA.2	P681H	1	3	3	2	4
Omicron	BA.2	N764K	1	2	2	2	2
Omicron	BA.2	D796Y	3	4	4	2	4
Omicron	BA.2	Q954H	1	1	1	2	4
Omicron	BA.2	N969K	1	1	1	2	1
Omicron	BA.4	T19I	2	4	3	3	3
Omicron	BA.4	A27S	4	3	3	3	3
Omicron	BA.4	G142D	2	3	3	3	3
Omicron	BA.4	V213G	3	4	3	3	3
Omicron	BA.4	G339D	1	1	4	2	2
Omicron	BA.4	S371F	1	1	1	1	2
Omicron	BA.4	S373P	1	2	2	2	2
Omicron	BA.4	S375F	1	2	1	1	2
Omicron	BA.4	T376A	1	1	1	2	2
Omicron	BA.4	D405N	1	1	1	1	2
Omicron	BA.4	R408S	2	4	3	3	3
Omicron	BA.4	K417N	4	4	4	2	3
Omicron	BA.4	N440K	1	1	2	2	4
Omicron	BA.4	L452R	1	1	2	2	2
Omicron	BA.4	S477N	3	2	2	2	3
Omicron	BA.4	T478K	2	4	3	3	4
Omicron	BA.4	E484A	3	2	4	2	4
Omicron	BA.4	F486V	1	1	1	1	2
Omicron	BA.4	Q498R	1	1	1	1	2
Omicron	BA.4	N501Y	1	1	1	2	4
Omicron	BA.4	Y505H	1	1	1	2	2
Omicron	BA.4	D614G	3	3	3	3	3
Omicron	BA.4	H655Y	2	3	3	3	3
Omicron	BA.4	N679K	1	1	2	2	2
Omicron	BA.4	P681H	1	3	3	2	4
Omicron	BA.4	N764K	1	2	2	2	2
Omicron	BA.4	D796Y	3	4	4	2	4
Omicron	BA.4	Q954H	1	1	1	2	4
Omicron	BA.4	N969K	1	1	1	2	1
Omicron	BA.5	T19I	2	4	3	3	3
Omicron	BA.5	A27S	4	3	3	3	3
Omicron	BA.5	G142D	2	3	3	3	3
Omicron	BA.5	V213G	3	4	3	3	3
Omicron	BA.5	G339D	1	1	4	2	2
Omicron	BA.5	S371F	1	1	1	1	2
Omicron	BA.5	S373P	1	2	2	2	2
Omicron	BA.5	S375F	1	2	1	1	2
Omicron	BA.5	T376A	1	1	1	2	2
Omicron	BA.5	D405N	1	1	1	1	2
Omicron	BA.5	R408S	2	4	3	3	3
Omicron	BA.5	K417N	4	4	4	2	3
Omicron	BA.5	N440K	1	1	2	2	4
Omicron	BA.5	L452R	1	1	2	2	2
Omicron	BA.5	S477N	3	2	2	2	3
Omicron	BA.5	T478K	2	4	3	3	4
Omicron	BA.5	E484A	3	2	4	2	4
Omicron	BA.5	F486V	1	1	1	1	2
Omicron	BA.5	Q498R	1	1	1	1	2
Omicron	BA.5	N501Y	1	1	1	2	4
Omicron	BA.5	Y505H	1	1	1	2	2
Omicron	BA.5	D614G	3	3	3	3	3
Omicron	BA.5	H655Y	2	3	3	3	3
Omicron	BA.5	N679K	1	1	2	2	2
Omicron	BA.5	P681H	1	3	3	2	4
Omicron	BA.5	N764K	1	2	2	2	2
Omicron	BA.5	D796Y	3	4	4	2	4
Omicron	BA.5	Q954H	1	1	1	2	4
Omicron	BA.5	N969K	1	1	1	2	1
Omicron	BA.2.12.1	T19I	2	4	3	3	3
Omicron	BA.2.12.1	A27S	4	3	3	3	3
Omicron	BA.2.12.1	G142D	2	3	3	3	3
Omicron	BA.2.12.1	V213G	3	4	3	3	3
Omicron	BA.2.12.1	G339D	1	1	4	2	2
Omicron	BA.2.12.1	S371F	1	1	1	1	2
Omicron	BA.2.12.1	S373P	1	2	2	2	2
Omicron	BA.2.12.1	S375F	1	2	1	1	2
Omicron	BA.2.12.1	T376A	1	1	1	2	2
Omicron	BA.2.12.1	D405N	1	1	1	1	2
Omicron	BA.2.12.1	R408S	2	4	3	3	3
Omicron	BA.2.12.1	K417N	4	4	4	2	3
Omicron	BA.2.12.1	N440K	1	1	2	2	4
Omicron	BA.2.12.1	L452Q	1	1	2	2	2
Omicron	BA.2.12.1	S477N	3	2	2	2	3
Omicron	BA.2.12.1	T478K	2	4	3	3	4
Omicron	BA.2.12.1	E484A	3	2	4	2	4
Omicron	BA.2.12.1	Q493R	1	1	1	1	2
Omicron	BA.2.12.1	Q498R	1	1	1	1	2
Omicron	BA.2.12.1	N501Y	1	1	1	2	4
Omicron	BA.2.12.1	Y505H	1	1	1	2	2
Omicron	BA.2.12.1	D614G	3	3	3	3	3
Omicron	BA.2.12.1	H655Y	2	3	3	3	3
Omicron	BA.2.12.1	N679K	1	1	2	2	2
Omicron	BA.2.12.1	P681H	1	3	3	2	4
Omicron	BA.2.12.1	S704L	1	2	2	2	3
Omicron	BA.2.12.1	N764K	1	2	2	2	2
Omicron	BA.2.12.1	D796Y	3	4	4	2	4
Omicron	BA.2.12.1	Q954H	1	1	1	2	4
Omicron	BA.2.12.1	N969K	1	1	1	2	1
Omicron	BA.2.75	T19I	2	4	3	3	3
Omicron	BA.2.75	A27S	4	3	3	3	3
Omicron	BA.2.75	G142D	2	3	3	3	3
Omicron	BA.2.75	K147E	1	2	4	2	2
Omicron	BA.2.75	W152R	1	4	2	3	3
Omicron	BA.2.75	F157L	1	2	2	2	3
Omicron	BA.2.75	I210V	1	2	2	3	2
Omicron	BA.2.75	V213G	3	4	3	3	3
Omicron	BA.2.75	G257S	3	3	3	3	3
Omicron	BA.2.75	G339H	1	1	4	2	2
Omicron	BA.2.75	S371F	1	1	1	1	2
Omicron	BA.2.75	S373P	1	2	2	2	2
Omicron	BA.2.75	S375F	1	2	1	1	2
Omicron	BA.2.75	T376A	1	1	1	2	2
Omicron	BA.2.75	D405N	1	1	1	1	2
Omicron	BA.2.75	R408S	2	4	3	3	3
Omicron	BA.2.75	K417N	4	4	4	2	3
Omicron	BA.2.75	N440K	1	1	2	2	4
Omicron	BA.2.75	G446S	4	3	3	3	3
Omicron	BA.2.75	N460K	3	4	4	1	2
Omicron	BA.2.75	S477N	3	2	2	2	3
Omicron	BA.2.75	T478K	2	4	3	3	4
Omicron	BA.2.75	E484A	3	2	4	2	4
Omicron	BA.2.75	R493Q	1	1	1	1	2
Omicron	BA.2.75	Q498R	1	1	1	1	2
Omicron	BA.2.75	N501Y	1	1	1	2	4
Omicron	BA.2.75	Y505H	1	1	1	2	2
Omicron	BA.2.75	D614G	3	3	3	3	3
Omicron	BA.2.75	H655Y	2	3	3	3	3
Omicron	BA.2.75	N679K	1	1	2	2	2
Omicron	BA.2.75	P681H	1	3	3	2	4
Omicron	BA.2.75	N764K	1	2	2	2	2
Omicron	BA.2.75	D796Y	3	4	4	2	4
Omicron	BA.2.75	Q954H	1	1	1	2	4
Omicron	BA.2.75	N969K	1	1	1	2	1
Omicron	BQ.1	T19I	2	4	3	3	3
Omicron	BQ.1	A27S	4	3	3	3	3
Omicron	BQ.1	G142D	2	3	3	3	3
Omicron	BQ.1	V213G	3	4	3	3	3
Omicron	BQ.1	G339D	1	1	4	2	2
Omicron	BQ.1	S371F	1	1	1	1	2
Omicron	BQ.1	S373P	1	2	2	2	2
Omicron	BQ.1	S375F	1	2	1	1	2
Omicron	BQ.1	T376A	1	1	1	2	2
Omicron	BQ.1	D405N	1	1	1	1	2
Omicron	BQ.1	R408S	2	4	3	3	3
Omicron	BQ.1	K417N	4	4	4	2	3
Omicron	BQ.1	N440K	1	1	2	2	4
Omicron	BQ.1	K444T	4	4	2	3	3
Omicron	BQ.1	L452R	1	1	2	2	2
Omicron	BQ.1	N460K	3	4	4	1	2
Omicron	BQ.1	S477N	3	2	2	2	3
Omicron	BQ.1	T478K	2	4	3	3	4
Omicron	BQ.1	E484A	3	2	4	2	4
Omicron	BQ.1	F486V	1	1	1	1	2
Omicron	BQ.1	Q493Q	1	1	1	1	2
Omicron	BQ.1	Q498R	1	1	1	1	2
Omicron	BQ.1	N501Y	1	1	1	2	4
Omicron	BQ.1	Y505H	1	1	1	2	2
Omicron	BQ.1	D614G	3	3	3	3	3
Omicron	BQ.1	H655Y	2	3	3	3	3
Omicron	BQ.1	N679K	1	1	2	2	2
Omicron	BQ.1	P681H	1	3	3	2	4
Omicron	BQ.1	N764K	1	2	2	2	2
Omicron	BQ.1	D796Y	3	4	4	2	4
Omicron	BQ.1	Q954H	1	1	1	2	4
Omicron	BQ.1	N969K	1	1	1	2	1
Omicron	XBB	T19I	2	4	3	3	3
Omicron	XBB	A27S	4	3	3	3	3
Omicron	XBB	V83A	4	2	2	2	3
Omicron	XBB	G142D	2	3	3	3	3
Omicron	XBB	H146Q	4	3	3	3	3
Omicron	XBB	Q183E	1	1	1	1	2
Omicron	XBB	V213E	3	4	3	3	3
Omicron	XBB	G339H	1	1	4	2	2
Omicron	XBB	R346T	1	1	4	2	4
Omicron	XBB	L368I	1	1	1	1	1
Omicron	XBB	S371F	1	1	1	1	2
Omicron	XBB	S373P	1	2	2	2	2
Omicron	XBB	S375F	1	2	1	1	2
Omicron	XBB	T376A	1	1	1	2	2
Omicron	XBB	D405N	1	1	1	1	2
Omicron	XBB	R408S	2	4	3	3	3
Omicron	XBB	K417N	4	4	4	2	3
Omicron	XBB	N440K	1	1	2	2	4
Omicron	XBB	V445P	4	2	2	2	2
Omicron	XBB	G446S	4	3	3	3	3
Omicron	XBB	N460K	3	4	4	1	2
Omicron	XBB	S477N	3	2	2	2	3
Omicron	XBB	T478K	2	4	3	3	4
Omicron	XBB	E484A	3	2	4	2	4
Omicron	XBB	F486S	1	1	1	1	2
Omicron	XBB	F490S	4	2	4	2	2
Omicron	XBB	R493Q	1	1	1	1	2
Omicron	XBB	Q498R	1	1	1	1	2
Omicron	XBB	N501Y	1	1	1	2	4
Omicron	XBB	Y505H	1	1	1	2	2
Omicron	XBB	D614G	3	3	3	3	3
Omicron	XBB	H655Y	2	3	3	3	3
Omicron	XBB	N679K	1	1	2	2	2
Omicron	XBB	P681H	1	3	3	2	4
Omicron	XBB	N764K	1	2	2	2	2
Omicron	XBB	D796Y	3	4	4	2	4
Omicron	XBB	Q954H	1	1	1	2	4
Omicron	XBB	N969K	1	1	1	2	1
Omicron	XBB.1.5	T19I	2	4	3	3	3
Omicron	XBB.1.5	A27S	4	3	3	3	3
Omicron	XBB.1.5	V83A	4	2	2	2	3
Omicron	XBB.1.5	G142D	2	3	3	3	3
Omicron	XBB.1.5	H146Q	4	3	3	3	3
Omicron	XBB.1.5	Q183E	1	1	1	1	2
Omicron	XBB.1.5	V213E	3	4	3	3	3
Omicron	XBB.1.5	G252V	1	3	3	3	4
Omicron	XBB.1.5	G339H	1	1	4	2	2
Omicron	XBB.1.5	R346T	1	1	4	2	4
Omicron	XBB.1.5	L368I	1	1	1	1	1
Omicron	XBB.1.5	S371F	1	1	1	1	2
Omicron	XBB.1.5	S373P	1	2	2	2	2
Omicron	XBB.1.5	S375F	1	2	1	1	2
Omicron	XBB.1.5	T376A	1	1	1	2	2
Omicron	XBB.1.5	D405N	1	1	1	1	2
Omicron	XBB.1.5	R408S	2	4	3	3	3
Omicron	XBB.1.5	K417N	4	4	4	2	3
Omicron	XBB.1.5	N440K	1	1	2	2	4
Omicron	XBB.1.5	V445P	4	2	2	2	2
Omicron	XBB.1.5	G446S	4	3	3	3	3
Omicron	XBB.1.5	N460K	3	4	4	1	2
Omicron	XBB.1.5	S477N	3	2	2	2	3
Omicron	XBB.1.5	T478K	2	4	3	3	4
Omicron	XBB.1.5	E484A	3	2	4	2	4
Omicron	XBB.1.5	F486P	1	1	1	1	2
Omicron	XBB.1.5	F490S	4	2	4	2	2
Omicron	XBB.1.5	R493Q	1	1	1	1	2
Omicron	XBB.1.5	Q498R	1	1	1	1	2
Omicron	XBB.1.5	N501Y	1	1	1	2	4
Omicron	XBB.1.5	Y505H	1	1	1	2	2
Omicron	XBB.1.5	D614G	3	3	3	3	3
Omicron	XBB.1.5	H655Y	2	3	3	3	3
Omicron	XBB.1.5	N679K	1	1	2	2	2
Omicron	XBB.1.5	P681H	1	3	3	2	4
Omicron	XBB.1.5	N764K	1	2	2	2	2
Omicron	XBB.1.5	D796Y	3	4	4	2	4
Omicron	XBB.1.5	Q954H	1	1	1	2	4
Omicron	XBB.1.5	N969K	1	1	1	2	1
Omicron	XBB.1.16	T19I	2	4	3	3	3
Omicron	XBB.1.16	A27S	4	3	3	3	3
Omicron	XBB.1.16	V83A	4	2	2	2	3
Omicron	XBB.1.16	G142D	2	3	3	3	3
Omicron	XBB.1.16	H146Q	4	3	3	3	3
Omicron	XBB.1.16	E180V	3	2	1	2	4
Omicron	XBB.1.16	Q183E	1	1	1	1	2
Omicron	XBB.1.16	V213E	3	4	3	3	3
Omicron	XBB.1.16	G252V	1	3	3	3	4
Omicron	XBB.1.16	G339H	1	1	4	2	2
Omicron	XBB.1.16	R346T	1	1	4	2	4
Omicron	XBB.1.16	L368I	1	1	1	1	1
Omicron	XBB.1.16	S371F	1	1	1	1	2
Omicron	XBB.1.16	S373P	1	2	2	2	2
Omicron	XBB.1.16	S375F	1	2	1	1	2
Omicron	XBB.1.16	T376A	1	1	1	2	2
Omicron	XBB.1.16	D405N	1	1	1	1	2
Omicron	XBB.1.16	R408S	2	4	3	3	3
Omicron	XBB.1.16	K417N	4	4	4	2	3
Omicron	XBB.1.16	N440K	1	1	2	2	4
Omicron	XBB.1.16	V445P	4	2	2	2	2
Omicron	XBB.1.16	G446S	4	3	3	3	3
Omicron	XBB.1.16	N460K	3	4	4	1	2
Omicron	XBB.1.16	S477N	3	2	2	2	3
Omicron	XBB.1.16	T478R	2	4	3	3	4
Omicron	XBB.1.16	E484A	3	2	4	2	4
Omicron	XBB.1.16	F486P	1	1	1	1	2
Omicron	XBB.1.16	F490S	4	2	4	2	2
Omicron	XBB.1.16	R493Q	1	1	1	1	2
Omicron	XBB.1.16	Q498R	1	1	1	1	2
Omicron	XBB.1.16	N501Y	1	1	1	2	4
Omicron	XBB.1.16	Y505H	1	1	1	2	2
Omicron	XBB.1.16	D614G	3	3	3	3	3
Omicron	XBB.1.16	H655Y	2	3	3	3	3
Omicron	XBB.1.16	N679K	1	1	2	2	2
Omicron	XBB.1.16	P681H	1	3	3	2	4
Omicron	XBB.1.16	N764K	1	2	2	2	2
Omicron	XBB.1.16	D796Y	3	4	4	2	4
Omicron	XBB.1.16	Q954H	1	1	1	2	4
Omicron	XBB.1.16	N969K	1	1	1	2	1
Kappa	B.1.617.1	E154K	1	2	2	3	4
Kappa	B.1.617.1	L452R	1	1	2	2	2
Kappa	B.1.617.1	E484Q	3	2	4	2	4
Kappa	B.1.617.1	D614G	3	3	3	3	3
Kappa	B.1.617.1	P681R	1	3	3	2	4
Kappa	B.1.617.1	Q1071H	1	1	4	2	4
Eta	B.1.525	Q52R	3	4	3	3	3
Eta	B.1.525	A67V	3	4	3	3	3
Eta	B.1.525	E484K	3	2	4	2	4
Eta	B.1.525	D614G	3	3	3	3	3
Eta	B.1.525	Q677H	2	3	3	3	3
Eta	B.1.525	F888L	1	1	1	2	4
Iota	B.1.526	L5F	2	3	3	3	3
Iota	B.1.526	T95I	2	3	3	3	3
Iota	B.1.526	D253G	2	4	3	3	3
Iota	B.1.526	E484K	3	2	4	2	4
Iota	B.1.526	D614G	3	3	3	3	3
Iota	B.1.526	A701V	3	4	3	2	3
Lambda	C.37	G75V	1	3	3	3	3
Lambda	C.37	T76I	4	2	3	3	3
Lambda	C.37	D253N	2	4	3	3	3
Lambda	C.37	L452Q	1	1	2	2	2
Lambda	C.37	F490S	4	2	4	2	2
Lambda	C.37	D614G	3	3	3	3	3
Lambda	C.37	T859N	2	3	3	3	3
Mu	B.1.621	T95I	2	3	3	3	3
Mu	B.1.621	Y144S	2	3	3	3	3
Mu	B.1.621	Y145N	3	3	3	3	3
Mu	B.1.621	R346K	1	1	4	2	4
Mu	B.1.621	E484K	3	2	4	2	4
Mu	B.1.621	N501Y	1	1	1	2	4
Mu	B.1.621	D614G	3	3	3	3	3
Mu	B.1.621	P681H	1	3	3	2	4
Mu	B.1.621	D950N	4	2	2	2	4
S:732A	B.1.1.519	T478K	2	4	3	3	4
S:732A	B.1.1.519	D614G	3	3	3	3	3
S:732A	B.1.1.519	P681H	1	3	3	2	4
S:732A	B.1.1.519	T732A	4	3	2	3	3
S:126A	S:126A	P26S	3	3	3	3	3
S:126A	S:126A	V126A	1	1	4	2	4
S:126A	S:126A	H245Y	2	3	3	3	3
S:126A	S:126A	S477N	3	2	2	2	3
S:126A	S:126A	E484K	3	2	4	2	4
S:126A	S:126A	D614G	3	3	3	3	3
S:126A	S:126A	P681H	1	3	3	2	4
S:126A	S:126A	T1027I	2	4	3	3	4
S:126A	S:126A	D1118H	1	2	2	2	2
EU1	B.1.177	A222V	3	4	3	2	3
Epsilon	-	S13I	4	3	2	3	3
Epsilon	-	W152C	1	4	2	3	3
Epsilon	-	L452R	1	1	2	2	2
Epsilon	-	D614G	3	3	3	3	3
S:439K	-	N439K	2	3	3	3	4
S:439K	-	D614G	3	3	3	3	3
S:677H.Robin1	-	D614G	3	3	3	3	3
S:677H.Robin1	-	Q677H	2	3	3	3	3
S:677P.Pelican	-	D614G	3	3	3	3	3
S:677P.Pelican	-	Q677P	2	3	3	3	3
20A.EU2	-	S477N	3	2	2	2	3
20A/S:98F	-	S98F	2	3	3	3	3
20A/S:98F	-	D614G	3	3	3	3	3
20C/S:80Y	-	D80Y	2	3	3	3	3
20C/S:80Y	-	D614G	3	3	3	3	3
20B/S:626S	-	D614G	3	3	3	3	3
20B/S:626S	-	A626S	1	3	3	3	4
20B/S:1122L	-	D614G	3	3	3	3	3
20B/S:1122L	-	V1122L	2	3	3	3	3

## Sheet: Supplementary Information 2
Mutation	Country	Region	Month	Total Sequences	Variant Sequences	Frequency	Cluster number in the cluster model for the months analyzed
							1-3	1-6	1-9	1-12	1-34
D614G	All	All	All	4458290	4437221	0.9953	3	3	3	3	3
T478K	All	All	All	4458290	3409242	0.7647	2	4	3	3	4
G142D	All	All	All	4458290	2898318	0.6501	2	3	3	3	3
L452R	All	All	All	4458290	2579024	0.5785	1	1	2	2	2
P681R	All	All	All	4458290	2132076	0.4782	1	3	3	2	4
T19R	All	All	All	4458290	2114370	0.4743	2	4	3	3	3
D950N	All	All	All	4458290	2099887	0.471	4	2	2	2	4
E156G	All	All	All	4458290	2050651	0.46	1	2	2	3	4
P681H	All	All	All	4458290	1808956	0.4058	1	3	3	2	4
N501Y	All	All	All	4458290	1755761	0.3938	1	1	1	2	4
T95I	All	All	All	4458290	1509357	0.3386	2	3	3	3	3
H655Y	All	All	All	4458290	1367210	0.3067	2	3	3	3	3
N969K	All	All	All	4458290	1339729	0.3005	1	1	1	2	1
Q954H	All	All	All	4458290	1337655	0.3	1	1	1	2	4
D796Y	All	All	All	4458290	1337203	0.2999	3	4	4	2	4
N679K	All	All	All	4458290	1332880	0.299	1	1	2	2	2
S477N	All	All	All	4458290	1317979	0.2956	3	2	2	2	3
E484A	All	All	All	4458290	1288229	0.289	3	2	4	2	4
N764K	All	All	All	4458290	1282330	0.2876	1	2	2	2	2
Q498R	All	All	All	4458290	1280238	0.2872	1	1	1	1	2
Y505H	All	All	All	4458290	1278857	0.2868	1	1	1	2	2
G339D	All	All	All	4458290	1268428	0.2845	1	1	4	2	2
S373P	All	All	All	4458290	1267706	0.2843	1	2	2	2	2
S375F	All	All	All	4458290	1264775	0.2837	1	2	1	1	2
K417N	All	All	All	4458290	1126508	0.2527	4	4	4	2	3
N440K	All	All	All	4458290	1121827	0.2516	1	1	2	2	4
Q493R	All	All	All	4458290	856502	0.1921	1	1	1	1	2
A27S	All	All	All	4458290	767204	0.1721	4	3	3	3	3
T19I	All	All	All	4458290	764027	0.1714	2	4	3	3	3
V213G	All	All	All	4458290	760638	0.1706	3	4	3	3	3
T376A	All	All	All	4458290	750326	0.1683	1	1	1	2	2
S371F	All	All	All	4458290	749365	0.1681	1	1	1	1	2
D405N	All	All	All	4458290	748974	0.168	1	1	1	1	2
R408S	All	All	All	4458290	728949	0.1635	2	4	3	3	3
A67V	All	All	All	4458290	573549	0.1286	3	4	3	3	3
T547K	All	All	All	4458290	570034	0.1279	4	3	3	3	3
L981F	All	All	All	4458290	569931	0.1278	1	1	4	1	2
N856K	All	All	All	4458290	569780	0.1278	1	1	4	1	2
G496S	All	All	All	4458290	536291	0.1203	1	1	1	2	2
S371L	All	All	All	4458290	514413	0.1154	1	1	1	1	2
L212I	All	All	All	4458290	506243	0.1136	1	2	1	1	2
T716I	All	All	All	4458290	446213	0.1001	2	4	3	3	3
A570D	All	All	All	4458290	442025	0.0991	4	2	2	2	2
S982A	All	All	All	4458290	441763	0.0991	1	1	2	2	4
D1118H	All	All	All	4458290	441226	0.099	1	2	2	2	2
G446S	All	All	All	4458290	431773	0.0968	4	3	3	3	3
F486V	All	All	All	4458290	428027	0.096	1	1	1	1	2
R346K	All	All	All	4458290	335566	0.0753	1	1	4	2	4
A222V	All	All	All	4458290	300844	0.0675	3	4	3	2	3
S704L	All	All	All	4458290	149918	0.0336	1	2	2	2	3
L452Q	All	All	All	4458290	136742	0.0307	1	1	2	2	2
Y145H	All	All	All	4458290	105819	0.0237	3	3	3	3	3
L5F	All	All	All	4458290	94095	0.0211	2	3	3	3	3
L18F	All	All	All	4458290	88888	0.0199	2	3	3	3	3
R346T	All	All	All	4458290	87755	0.0197	1	1	4	2	4
N460K	All	All	All	4458290	68838	0.0154	3	4	4	1	2
S112L	All	All	All	4458290	64282	0.0144	1	2	2	2	4
V1264L	All	All	All	4458290	64233	0.0144	4	3	3	3	3
E484K	All	All	All	4458290	63465	0.0142	3	2	4	2	4
A701V	All	All	All	4458290	55583	0.0125	3	4	3	2	3
K444T	All	All	All	4458290	55618	0.0125	4	4	2	3	3
N211R	All	All	All	4458290	41740	0.0094	1	2	2	1	2
S13I	All	All	All	4458290	36700	0.0082	4	3	2	3	3
T76I	All	All	All	4458290	36562	0.0082	4	2	3	3	3
D253G	All	All	All	4458290	36252	0.0081	2	4	3	3	3
W152C	All	All	All	4458290	36008	0.0081	1	4	2	3	3
K1191N	All	All	All	4458290	35615	0.008	4	4	3	3	3
V289I	All	All	All	4458290	32517	0.0073	1	4	4	2	3
P26S	All	All	All	4458290	31415	0.007	3	3	3	3	3
V1176F	All	All	All	4458290	31076	0.007	1	2	2	3	3
T1027I	All	All	All	4458290	29406	0.0066	2	4	3	3	4
N658S	All	All	All	4458290	28938	0.0065	1	1	4	1	2
V1104L	All	All	All	4458290	28482	0.0064	2	3	3	3	3
D138Y	All	All	All	4458290	28280	0.0063	2	3	3	3	3
K417T	All	All	All	4458290	28074	0.0063	4	4	4	2	3
Q677H	All	All	All	4458290	27474	0.0062	2	3	3	3	3
T20N	All	All	All	4458290	24610	0.0055	2	4	2	3	3
R190S	All	All	All	4458290	23464	0.0053	1	1	2	2	4
V3G	All	All	All	4458290	23574	0.0053	1	2	2	2	2
D138H	All	All	All	4458290	21716	0.0049	2	3	3	3	3
V36F	All	All	All	4458290	16620	0.0037	1	2	4	2	4
T732A	All	All	All	4458290	16046	0.0036	4	3	2	3	3
V70I	All	All	All	4458290	16165	0.0036	4	3	3	3	4
P809S	All	All	All	4458290	14727	0.0033	4	2	4	2	4
Q675H	All	All	All	4458290	14784	0.0033	2	3	3	3	3
A688V	All	All	All	4458290	13528	0.003	3	3	3	3	3
Q613H	All	All	All	4458290	13585	0.003	4	3	3	3	3
A1020S	All	All	All	4458290	12754	0.0029	2	3	3	3	3
A1078S	All	All	All	4458290	12797	0.0029	2	3	3	3	3
G339H	All	All	All	4458290	12455	0.0028	1	1	4	2	2
S98F	All	All	All	4458290	12666	0.0028	2	3	3	3	3
T859N	All	All	All	4458290	12489	0.0028	2	3	3	3	3
D80Y	All	All	All	4458290	11795	0.0026	2	3	3	3	3
F490S	All	All	All	4458290	11785	0.0026	4	2	4	2	2
G181V	All	All	All	4458290	11641	0.0026	4	3	3	3	3
F157S	All	All	All	4458290	11064	0.0025	1	2	2	2	3
L1141F	All	All	All	4458290	10971	0.0025	1	1	1	1	1
N1074S	All	All	All	4458290	11241	0.0025	1	3	2	2	4
N164K	All	All	All	4458290	10580	0.0024	1	1	2	2	2
W152R	All	All	All	4458290	10558	0.0024	1	4	2	3	3
D80G	All	All	All	4458290	10057	0.0023	2	3	3	3	3
D950H	All	All	All	4458290	10087	0.0023	4	2	2	2	4
K77T	All	All	All	4458290	10431	0.0023	3	4	4	1	2
P251L	All	All	All	4458290	10146	0.0023	4	2	4	2	3
F157L	All	All	All	4458290	9991	0.0022	1	2	2	2	3
S939F	All	All	All	4458290	9771	0.0022	2	3	3	3	3
T572I	All	All	All	4458290	9712	0.0022	3	3	3	3	3
P1162S	All	All	All	4458290	9361	0.0021	2	3	3	3	3
Q957R	All	All	All	4458290	9420	0.0021	1	2	2	2	4
S494P	All	All	All	4458290	9246	0.0021	2	3	3	3	3
G257S	All	All	All	4458290	8871	0.002	3	3	3	3	3
A262S	All	All	All	4458290	8448	0.0019	4	3	3	3	3
G1124V	All	All	All	4458290	8352	0.0019	2	3	3	3	3
M153I	All	All	All	4458290	8455	0.0019	4	3	3	3	3
K147E	All	All	All	4458290	8051	0.0018	1	2	4	2	2
M177I	All	All	All	4458290	8241	0.0018	2	4	4	2	3
W258L	All	All	All	4458290	8154	0.0018	4	3	3	3	3
H1101Y	All	All	All	4458290	7497	0.0017	1	1	1	2	3
I210V	All	All	All	4458290	7748	0.0017	1	2	2	3	2
S221L	All	All	All	4458290	7797	0.0017	1	3	3	3	3
S255F	All	All	All	4458290	7514	0.0017	2	3	3	3	3
T22I	All	All	All	4458290	7618	0.0017	2	3	3	3	3
V1228L	All	All	All	4458290	7369	0.0017	3	3	3	3	3
E583D	All	All	All	4458290	7322	0.0016	4	3	2	3	3
L176F	All	All	All	4458290	7038	0.0016	4	3	3	3	3
V70F	All	All	All	4458290	6991	0.0016	4	3	3	3	4
A845S	All	All	All	4458290	6529	0.0015	2	3	3	3	3
A879S	All	All	All	4458290	6793	0.0015	2	3	3	3	3
G1219V	All	All	All	4458290	6623	0.0015	3	4	2	2	2
T1117I	All	All	All	4458290	6639	0.0015	1	3	2	3	3
G446V	All	All	All	4458290	6106	0.0014	4	3	3	3	3
P1162L	All	All	All	4458290	6143	0.0014	2	3	3	3	3
S12F	All	All	All	4458290	6322	0.0014	4	2	2	3	3
T547I	All	All	All	4458290	6218	0.0014	4	3	3	3	3
T859I	All	All	All	4458290	6066	0.0014	2	3	3	3	3
D215G	All	All	All	4458290	5618	0.0013	3	3	2	3	3
H146Q	All	All	All	4458290	5685	0.0013	4	3	3	3	3
H49Y	All	All	All	4458290	5784	0.0013	2	3	3	3	3
I1081V	All	All	All	4458290	5915	0.0013	1	2	2	1	2
K1073N	All	All	All	4458290	6015	0.0013	4	2	2	3	3
K97E	All	All	All	4458290	5871	0.0013	1	2	1	1	2
M1237I	All	All	All	4458290	5797	0.0013	4	2	3	2	4
S254F	All	All	All	4458290	5613	0.0013	2	3	3	3	3
S640F	All	All	All	4458290	6009	0.0013	4	3	3	3	3
V213E	All	All	All	4458290	5872	0.0013	3	4	3	3	3
V622F	All	All	All	4458290	5675	0.0013	4	2	3	3	3
D178H	All	All	All	4458290	5292	0.0012	1	2	2	2	4
F486S	All	All	All	4458290	5394	0.0012	1	1	1	1	2
G75V	All	All	All	4458290	5418	0.0012	1	3	3	3	3
G769V	All	All	All	4458290	5475	0.0012	2	3	3	3	3
L368I	All	All	All	4458290	5262	0.0012	1	1	1	1	1
L54F	All	All	All	4458290	5547	0.0012	2	3	3	3	3
P1263L	All	All	All	4458290	5480	0.0012	2	3	3	3	3
V6F	All	All	All	4458290	5177	0.0012	1	1	1	2	2
W152L	All	All	All	4458290	5134	0.0012	1	4	2	3	3
A520S	All	All	All	4458290	4980	0.0011	4	3	3	3	3
D1163Y	All	All	All	4458290	5080	0.0011	3	3	3	3	3
D80A	All	All	All	4458290	4858	0.0011	2	3	3	3	3
E484Q	All	All	All	4458290	4779	0.0011	3	2	4	2	4
E661D	All	All	All	4458290	5101	0.0011	1	2	2	2	4
G252V	All	All	All	4458290	4690	0.0011	1	3	3	3	4
Q183E	All	All	All	4458290	5058	0.0011	1	1	1	1	2
T20I	All	All	All	4458290	4853	0.0011	2	4	2	3	3
T299I	All	All	All	4458290	4859	0.0011	2	3	3	3	3
T51I	All	All	All	4458290	5049	0.0011	3	2	3	2	4
V445P	All	All	All	4458290	4933	0.0011	4	2	2	2	2
V83A	All	All	All	4458290	5115	0.0011	4	2	2	2	3
Y144T	All	All	All	4458290	4725	0.0011	2	3	3	3	3
A522V	All	All	All	4458290	4401	0.001	3	3	3	3	3
G1219C	All	All	All	4458290	4527	0.001	3	4	2	2	2
K444R	All	All	All	4458290	4244	0.001	4	4	2	3	3
L1265F	All	All	All	4458290	4454	0.001	4	3	2	3	3
L212V	All	All	All	4458290	4455	0.001	1	2	1	1	2
L216F	All	All	All	4458290	4496	0.001	4	3	3	3	3
L938F	All	All	All	4458290	4295	0.001	2	3	3	3	3
N439K	All	All	All	4458290	4560	0.001	2	3	3	3	4
N450D	All	All	All	4458290	4653	0.001	3	3	2	3	2
P174S	All	All	All	4458290	4323	0.001	1	2	2	2	4
R214H	All	All	All	4458290	4280	0.001	2	3	3	3	3
T29I	All	All	All	4458290	4547	0.001	3	3	3	3	3
V213P	All	All	All	4458290	4435	0.001	3	4	3	3	3
Y145S	All	All	All	4458290	4665	0.001	3	3	3	3	3

## Sheet: Supplementary Information 3
Lineage	Earliest date	Mutation	Cluster number in the cluster model for the months analyzed
			1-3	1-6	1-9	1-12	1-34
B.1	2020-01-01	D614G	3	3	3	3	3
B.1.499	2020-01-01	D614G	3	3	3	3	3
B.1.1.142	2020-01-04	D614G	3	3	3	3	3
B.1.2	2020-01-04	D614G	3	3	3	3	3
B.1.1.285	2020-01-09	D614G	3	3	3	3	3
B.1.36.1	2020-01-10	D614G	3	3	3	3	3
B.1.398	2020-01-10	T95I	2	3	3	3	3
B.1.398	2020-01-10	D614G	3	3	3	3	3
R.1	2020-01-14	W152L	1	4	2	3	3
R.1	2020-01-14	E484K	3	2	4	2	4
R.1	2020-01-14	D614G	3	3	3	3	3
R.1	2020-01-14	G769V	2	3	3	3	3
B.1.443	2020-01-17	D614G	3	3	3	3	3
A.6	2020-01-23	A829T	1	1	1	1	1
B.1.429	2020-01-26	S13I	4	3	2	3	3
B.1.429	2020-01-26	W152C	1	4	2	3	3
B.1.429	2020-01-26	L452R	1	1	2	2	2
B.1.429	2020-01-26	D614G	3	3	3	3	3
BA.1.1	2020-01-27	A67V	3	4	3	3	3
BA.1.1	2020-01-27	T95I	2	3	3	3	3
BA.1.1	2020-01-27	G339D	1	1	4	2	2
BA.1.1	2020-01-27	R346K	1	1	4	2	4
BA.1.1	2020-01-27	S371P	1	1	1	1	2
BA.1.1	2020-01-27	S371F	1	1	1	1	2
BA.1.1	2020-01-27	S373P	1	2	2	2	2
BA.1.1	2020-01-27	S375F	1	2	1	1	2
BA.1.1	2020-01-27	K417N	4	4	4	2	3
BA.1.1	2020-01-27	N440K	1	1	2	2	4
BA.1.1	2020-01-27	G446S	4	3	3	3	3
BA.1.1	2020-01-27	S477N	3	2	2	2	3
BA.1.1	2020-01-27	T478K	2	4	3	3	4
BA.1.1	2020-01-27	E484A	3	2	4	2	4
BA.1.1	2020-01-27	Q493R	1	1	1	1	2
BA.1.1	2020-01-27	G496S	1	1	1	2	2
BA.1.1	2020-01-27	Q498R	1	1	1	1	2
BA.1.1	2020-01-27	N501Y	1	1	1	2	4
BA.1.1	2020-01-27	Y505H	1	1	1	2	2
BA.1.1	2020-01-27	T547K	4	3	3	3	3
BA.1.1	2020-01-27	D614G	3	3	3	3	3
BA.1.1	2020-01-27	H655Y	2	3	3	3	3
BA.1.1	2020-01-27	N679K	1	1	2	2	2
BA.1.1	2020-01-27	P681H	1	3	3	2	4
BA.1.1	2020-01-27	N764K	1	2	2	2	2
BA.1.1	2020-01-27	D796Y	3	4	4	2	4
BA.1.1	2020-01-27	N856K	1	1	4	1	2
BA.1.1	2020-01-27	Q954H	1	1	1	2	4
BA.1.1	2020-01-27	N969K	1	1	1	2	1
BA.1.1	2020-01-27	L981F	1	1	4	1	2
B.1.526	2020-01-28	T95I	2	3	3	3	3
B.1.526	2020-01-28	D253G	2	4	3	3	3
B.1.526	2020-01-28	D614G	3	3	3	3	3
B.1.526	2020-01-28	E484K	3	2	4	2	4
B.1.526	2020-01-28	A701V	3	4	3	2	3
B.1.1.333	2020-01-29	L54F	2	3	3	3	3
B.1.1.333	2020-01-29	D138Y	2	3	3	3	3
B.1.1.333	2020-01-29	D614G	3	3	3	3	3
B.43	2020-01-30	L8V	3	4	4	2	2
B.1.177	2020-02-02	A222V	3	4	3	2	3
B.1.177	2020-02-02	D614G	3	3	3	3	3
B.1.177	2020-02-02	L18F	2	3	3	3	3
B.1.221	2020-02-02	S98F	2	3	3	3	3
B.1.221	2020-02-02	D614G	3	3	3	3	3
B.1.492	2020-02-02	D614G	3	3	3	3	3
B.1.1	2020-02-03	D614G	3	3	3	3	3
B.1.160	2020-02-06	S477N	3	2	2	2	3
B.1.160	2020-02-06	D614G	3	3	3	3	3
B.1.1.7	2020-02-07	N501Y	1	1	1	2	4
B.1.1.7	2020-02-07	A570D	4	2	2	2	2
B.1.1.7	2020-02-07	D614G	3	3	3	3	3
B.1.1.7	2020-02-07	P681H	1	3	3	2	4
B.1.1.7	2020-02-07	T716I	2	4	3	3	3
B.1.1.7	2020-02-07	S982A	1	1	2	2	4
B.1.1.7	2020-02-07	D1118H	1	2	2	2	2
B.53	2020-02-07	Y28H	4	2	2	2	4
B.1.1.28	2020-02-10	D614G	3	3	3	3	3
B.1.1.28	2020-02-10	V1176F	1	2	2	3	3
B.1.468	2020-02-13	D614G	3	3	3	3	3
B.1.36	2020-02-16	D614G	3	3	3	3	3
N.6	2020-02-16	D614G	3	3	3	3	3
B.1.351	2020-02-18	D80A	2	3	3	3	3
B.1.351	2020-02-18	D215G	3	3	2	3	3
B.1.351	2020-02-18	K417N	4	4	4	2	3
B.1.351	2020-02-18	E484K	3	2	4	2	4
B.1.351	2020-02-18	N501Y	1	1	1	2	4
B.1.351	2020-02-18	D614G	3	3	3	3	3
B.1.351	2020-02-18	A701V	3	4	3	2	3
B.1.456	2020-02-20	D614G	3	3	3	3	3
B.1.91	2020-02-21	D614G	3	3	3	3	3
B.1.91	2020-02-21	D839Y	4	3	2	2	4
B.1.1.214	2020-02-22	D614G	3	3	3	3	3
B.1.1.216	2020-02-24	D614G	3	3	3	3	3
B.1.222	2020-02-24	N439K	2	3	3	3	4
B.1.222	2020-02-24	D614G	3	3	3	3	3
B.1.76	2020-02-24	D614G	3	3	3	3	3
B.1.108	2020-02-25	D614G	3	3	3	3	3
B.1.1.331	2020-02-26	D614G	3	3	3	3	3
B.1.1.44	2020-02-28	D614G	3	3	3	3	3
B.1.223	2020-02-28	D614G	3	3	3	3	3
B.1.356	2020-02-28	D614G	3	3	3	3	3
B.1.1.323	2020-02-29	D614G	3	3	3	3	3
B.1.1.61	2020-02-29	D614G	3	3	3	3	3
B.1.1.10	2020-03-01	D614G	3	3	3	3	3
B.1.1.306	2020-03-01	D614G	3	3	3	3	3
B.1.1.33	2020-03-01	D614G	3	3	3	3	3
B.1.383	2020-03-01	D614G	3	3	3	3	3
B.1.1.1	2020-03-02	D614G	3	3	3	3	3
B.1.1.257	2020-03-02	D614G	3	3	3	3	3
B.1.1.319	2020-03-02	D614G	3	3	3	3	3
B.1.1.369	2020-03-02	D614G	3	3	3	3	3
B.1.1.482	2020-03-02	D614G	3	3	3	3	3
B.1.104	2020-03-02	D614G	3	3	3	3	3
B.1.110	2020-03-02	D614G	3	3	3	3	3
B.1.157	2020-03-03	D614G	3	3	3	3	3
B.1.212	2020-03-03	D614G	3	3	3	3	3
B.1.428	2020-03-03	D614G	3	3	3	3	3
B.1.617.1	2020-03-03	T95I	2	3	3	3	3
B.1.617.1	2020-03-03	E154K	1	2	2	3	4
B.1.617.1	2020-03-03	L452R	1	1	2	2	2
B.1.617.1	2020-03-03	E484Q	3	2	4	2	4
B.1.617.1	2020-03-03	D614G	3	3	3	3	3
B.1.617.1	2020-03-03	P681R	1	3	3	2	4
B.1.617.1	2020-03-03	Q1071H	1	1	4	2	4
B.1.12	2020-03-04	D614G	3	3	3	3	3
B.1.147	2020-03-04	D614G	3	3	3	3	3
B.1.166	2020-03-04	D614G	3	3	3	3	3
B.1.211	2020-03-04	D614G	3	3	3	3	3
B.1.277	2020-03-04	D614G	3	3	3	3	3
B.1.380	2020-03-04	D614G	3	3	3	3	3
B.1.8	2020-03-04	D614G	3	3	3	3	3
B.1.9	2020-03-04	D614G	3	3	3	3	3
B.1.205	2020-03-05	I119V	3	4	4	2	2
B.1.205	2020-03-05	D614G	3	3	3	3	3
B.1.22	2020-03-05	D614G	3	3	3	3	3
B.1.319	2020-03-05	D614G	3	3	3	3	3
B.1.6	2020-03-05	D614G	3	3	3	3	3
B.1.1.17	2020-03-06	D614G	3	3	3	3	3
B.1.1.17	2020-03-06	A831V	4	2	4	2	4
B.1.1.70	2020-03-06	D614G	3	3	3	3	3
B.1.1.71	2020-03-06	D614G	3	3	3	3	3
B.1.105	2020-03-06	D614G	3	3	3	3	3
B.1.201	2020-03-06	D614G	3	3	3	3	3
B.1.387	2020-03-06	D614G	3	3	3	3	3
B.1.395	2020-03-06	D614G	3	3	3	3	3
B.1.510	2020-03-06	D614G	3	3	3	3	3
B.1.617	2020-03-06	L452R	1	1	2	2	2
B.1.617	2020-03-06	E484Q	3	2	4	2	4
B.1.617	2020-03-06	D614G	3	3	3	3	3
B.1.69	2020-03-06	D614G	3	3	3	3	3
B.1.93	2020-03-06	D614G	3	3	3	3	3
B.1.1.204	2020-03-07	D614G	3	3	3	3	3
B.1.1.204	2020-03-07	N658K	1	1	4	1	2
B.1.1.371	2020-03-07	D614G	3	3	3	3	3
B.1.111	2020-03-07	D614G	3	3	3	3	3
B.1.320	2020-03-07	D614G	3	3	3	3	3
B.1.332	2020-03-07	D614G	3	3	3	3	3
B.1.1.372	2020-03-08	D614G	3	3	3	3	3
B.1.36.31	2020-03-08	R102S	2	4	3	3	4
B.1.36.31	2020-03-08	A222V	3	4	3	2	3
B.1.36.31	2020-03-08	D614G	3	3	3	3	3
B.1.371	2020-03-08	D614G	3	3	3	3	3
B.1.426	2020-03-08	D253G	2	4	3	3	3
B.1.426	2020-03-08	D614G	3	3	3	3	3
B.1.118	2020-03-09	D614G	3	3	3	3	3
B.1.128	2020-03-09	D614G	3	3	3	3	3
B.1.13	2020-03-09	D614G	3	3	3	3	3
B.1.179	2020-03-09	D614G	3	3	3	3	3
B.1.321	2020-03-09	D614G	3	3	3	3	3
B.1.343	2020-03-09	D614G	3	3	3	3	3
B.1.359	2020-03-09	D614G	3	3	3	3	3
B.1.39	2020-03-09	D614G	3	3	3	3	3
B.1.391	2020-03-09	D614G	3	3	3	3	3
B.1.513	2020-03-09	D614G	3	3	3	3	3
B.1.595	2020-03-09	D614G	3	3	3	3	3
B.1.151	2020-03-10	D614G	3	3	3	3	3
B.1.210	2020-03-10	D614G	3	3	3	3	3
B.1.37	2020-03-10	D614G	3	3	3	3	3
B.1.465	2020-03-10	D614G	3	3	3	3	3
B.1.465	2020-03-10	A879S	2	3	3	3	3
B.1.609	2020-03-10	D614G	3	3	3	3	3
B.1.619	2020-03-10	I210T	1	2	2	3	2
B.1.619	2020-03-10	N440K	1	1	2	2	4
B.1.619	2020-03-10	E484K	3	2	4	2	4
B.1.619	2020-03-10	D614G	3	3	3	3	3
B.1.619	2020-03-10	D936N	2	3	3	3	3
B.1.619	2020-03-10	S939F	2	3	3	3	3
B.1.619	2020-03-10	T1027I	2	4	3	3	4
B.1.1.16	2020-03-11	D614G	3	3	3	3	3
B.1.1.16	2020-03-11	A892S	1	3	3	3	3
B.1.1.271	2020-03-11	D614G	3	3	3	3	3
B.1.1.271	2020-03-11	Q677H	2	3	3	3	3
B.1.153	2020-03-11	D614G	3	3	3	3	3
B.1.369	2020-03-11	D614G	3	3	3	3	3
B.1.516	2020-03-11	D614G	3	3	3	3	3
B.1.555	2020-03-11	D614G	3	3	3	3	3
B.1.612	2020-03-11	D614G	3	3	3	3	3
AY.23	2020-03-12	T19R	2	4	3	3	3
AY.23	2020-03-12	L452R	1	1	2	2	2
AY.23	2020-03-12	T478K	2	4	3	3	4
AY.23	2020-03-12	D614G	3	3	3	3	3
AY.23	2020-03-12	P681R	1	3	3	2	4
AY.23	2020-03-12	V1264L	4	3	3	3	3
B.1.1.135	2020-03-12	D614G	3	3	3	3	3
B.1.1.176	2020-03-12	T20I	2	4	2	3	3
B.1.1.176	2020-03-12	R357K	1	1	1	2	4
B.1.1.176	2020-03-12	D614G	3	3	3	3	3
B.1.1.438	2020-03-12	D614G	3	3	3	3	3
B.1.1.89	2020-03-12	D614G	3	3	3	3	3
B.1.119	2020-03-12	D614G	3	3	3	3	3
B.1.142	2020-03-12	D614G	3	3	3	3	3
B.1.250	2020-03-12	D614G	3	3	3	3	3
B.1.280	2020-03-12	D614G	3	3	3	3	3
B.1.302	2020-03-12	D614G	3	3	3	3	3
B.1.344	2020-03-12	D614G	3	3	3	3	3
B.1.354	2020-03-12	D614G	3	3	3	3	3
B.1.413	2020-03-12	D614G	3	3	3	3	3
B.1.442	2020-03-12	D614G	3	3	3	3	3
B.1.494	2020-03-12	D614G	3	3	3	3	3
B.1.494	2020-03-12	P681L	1	3	3	2	4
B.1.586	2020-03-12	D614G	3	3	3	3	3
B.1.78	2020-03-12	D614G	3	3	3	3	3
B.1.1.194	2020-03-13	D614G	3	3	3	3	3
B.1.1.194	2020-03-13	K1073N	4	2	2	3	3
B.1.1.231	2020-03-13	D614G	3	3	3	3	3
B.1.158	2020-03-13	D614G	3	3	3	3	3
B.1.182	2020-03-13	D614G	3	3	3	3	3
B.1.190	2020-03-13	D614G	3	3	3	3	3
B.1.264	2020-03-13	D614G	3	3	3	3	3
B.1.273	2020-03-13	D614G	3	3	3	3	3
B.1.314	2020-03-13	D614G	3	3	3	3	3
B.1.323	2020-03-13	D614G	3	3	3	3	3
B.1.336	2020-03-13	D614G	3	3	3	3	3
B.1.350	2020-03-13	D614G	3	3	3	3	3
B.1.350	2020-03-13	G1219C	3	4	2	2	2
B.1.422	2020-03-13	D614G	3	3	3	3	3
B.1.439	2020-03-13	D614G	3	3	3	3	3
B.1.446	2020-03-13	D614G	3	3	3	3	3
B.1.547	2020-03-13	D614G	3	3	3	3	3
B.1.70	2020-03-13	D614G	3	3	3	3	3
C.25	2020-03-13	D614G	3	3	3	3	3
C.36	2020-03-13	D614G	3	3	3	3	3
C.36	2020-03-13	Q677H	2	3	3	3	3
B.1.1.13	2020-03-14	D614G	3	3	3	3	3
B.1.1.254	2020-03-14	D614G	3	3	3	3	3
B.1.1.419	2020-03-14	H49Y	2	3	3	3	3
B.1.1.419	2020-03-14	F157S	1	2	2	2	3
B.1.1.419	2020-03-14	N501T	1	1	1	2	4
B.1.1.419	2020-03-14	D614G	3	3	3	3	3
B.1.126	2020-03-14	D215Y	3	3	2	3	3
B.1.126	2020-03-14	D614G	3	3	3	3	3
B.1.215	2020-03-14	D614G	3	3	3	3	3
B.1.220	2020-03-14	D614G	3	3	3	3	3
B.1.378	2020-03-14	D614G	3	3	3	3	3
B.1.450	2020-03-14	D614G	3	3	3	3	3
B.1.491	2020-03-14	D614G	3	3	3	3	3
B.1.491	2020-03-14	D936Y	2	3	3	3	3
B.1.9.5	2020-03-14	D614G	3	3	3	3	3
BA.5.1	2020-03-14	T19I	2	4	3	3	3
BA.5.1	2020-03-14	V213G	3	4	3	3	3
BA.5.1	2020-03-14	G339D	1	1	4	2	2
BA.5.1	2020-03-14	S371F	1	1	1	1	2
BA.5.1	2020-03-14	S373P	1	2	2	2	2
BA.5.1	2020-03-14	S375F	1	2	1	1	2
BA.5.1	2020-03-14	T376A	1	1	1	2	2
BA.5.1	2020-03-14	D405N	1	1	1	1	2
BA.5.1	2020-03-14	R408S	2	4	3	3	3
BA.5.1	2020-03-14	K417N	4	4	4	2	3
BA.5.1	2020-03-14	N440K	1	1	2	2	4
BA.5.1	2020-03-14	L452R	1	1	2	2	2
BA.5.1	2020-03-14	S477N	3	2	2	2	3
BA.5.1	2020-03-14	T478K	2	4	3	3	4
BA.5.1	2020-03-14	E484A	3	2	4	2	4
BA.5.1	2020-03-14	F486V	1	1	1	1	2
BA.5.1	2020-03-14	Q498R	1	1	1	1	2
BA.5.1	2020-03-14	N501Y	1	1	1	2	4
BA.5.1	2020-03-14	Y505H	1	1	1	2	2
BA.5.1	2020-03-14	D614G	3	3	3	3	3
BA.5.1	2020-03-14	H655Y	2	3	3	3	3
BA.5.1	2020-03-14	N679K	1	1	2	2	2
BA.5.1	2020-03-14	P681H	1	3	3	2	4
BA.5.1	2020-03-14	N764K	1	2	2	2	2
BA.5.1	2020-03-14	D796Y	3	4	4	2	4
BA.5.1	2020-03-14	Q954H	1	1	1	2	4
BA.5.1	2020-03-14	N969K	1	1	1	2	1
B.1.1.113	2020-03-15	D614G	3	3	3	3	3
B.1.1.166	2020-03-15	L242F	3	4	4	2	4
B.1.1.166	2020-03-15	D614G	3	3	3	3	3
B.1.1.168	2020-03-15	M177I	2	4	4	2	3
B.1.1.168	2020-03-15	D614G	3	3	3	3	3
B.1.1.67	2020-03-15	D614G	3	3	3	3	3
B.1.1.67	2020-03-15	T29I	3	3	3	3	3
B.1.1.8	2020-03-15	D614G	3	3	3	3	3
B.1.110.3	2020-03-15	D614G	3	3	3	3	3
B.1.162	2020-03-15	D614G	3	3	3	3	3
B.1.208	2020-03-15	D614G	3	3	3	3	3
B.1.265	2020-03-15	D614G	3	3	3	3	3
B.1.279	2020-03-15	D614G	3	3	3	3	3
B.1.324	2020-03-15	D614G	3	3	3	3	3
B.1.384	2020-03-15	D614G	3	3	3	3	3
B.1.483	2020-03-15	D614G	3	3	3	3	3
B.1.496	2020-03-15	D614G	3	3	3	3	3
B.1.505	2020-03-15	D614G	3	3	3	3	3
B.1.507	2020-03-15	D614G	3	3	3	3	3
B.1.589	2020-03-15	D614G	3	3	3	3	3
B.1.590	2020-03-15	D614G	3	3	3	3	3
B.1.94	2020-03-15	D614G	3	3	3	3	3
B.1.1.164	2020-03-16	D614G	3	3	3	3	3
B.1.1.283	2020-03-16	D614G	3	3	3	3	3
B.1.1.378	2020-03-16	D614G	3	3	3	3	3
B.1.1.5	2020-03-16	D614G	3	3	3	3	3
B.1.1.513	2020-03-16	D614G	3	3	3	3	3
B.1.1.515	2020-03-16	D614G	3	3	3	3	3
B.1.163	2020-03-16	D614G	3	3	3	3	3
B.1.163	2020-03-16	I1172V	1	1	1	1	1
B.1.199	2020-03-16	D614G	3	3	3	3	3
B.1.224	2020-03-16	D614G	3	3	3	3	3
B.1.224	2020-03-16	S939F	2	3	3	3	3
B.1.227	2020-03-16	S477N	3	2	2	2	3
B.1.227	2020-03-16	D614G	3	3	3	3	3
B.1.284	2020-03-16	T572I	3	3	3	3	3
B.1.284	2020-03-16	D614G	3	3	3	3	3
B.1.293	2020-03-16	D614G	3	3	3	3	3
B.1.338	2020-03-16	D614G	3	3	3	3	3
B.1.379	2020-03-16	R214L	2	3	3	3	3
B.1.379	2020-03-16	D614G	3	3	3	3	3
B.1.382	2020-03-16	D614G	3	3	3	3	3
B.1.415	2020-03-16	D614G	3	3	3	3	3
B.1.420	2020-03-16	D614G	3	3	3	3	3
B.1.424	2020-03-16	D614G	3	3	3	3	3
B.1.441	2020-03-16	D614G	3	3	3	3	3
B.1.566	2020-03-16	D614G	3	3	3	3	3
B.1.1.132	2020-03-17	D614G	3	3	3	3	3
B.1.1.277	2020-03-17	D614G	3	3	3	3	3
B.1.1.277	2020-03-17	A626S	1	3	3	3	4
B.1.1.75	2020-03-17	D614G	3	3	3	3	3
B.1.1.75	2020-03-17	A846V	3	3	3	3	3
B.1.115	2020-03-17	D614G	3	3	3	3	3
B.1.115	2020-03-17	A706S	3	4	4	2	3
B.1.159	2020-03-17	D614G	3	3	3	3	3
B.1.178	2020-03-17	D614G	3	3	3	3	3
B.1.195	2020-03-17	D614G	3	3	3	3	3
B.1.333	2020-03-17	D614G	3	3	3	3	3
B.1.360	2020-03-17	D614G	3	3	3	3	3
B.1.38	2020-03-17	D614G	3	3	3	3	3
B.1.453	2020-03-17	D614G	3	3	3	3	3
B.1.482	2020-03-17	D614G	3	3	3	3	3
B.1.578	2020-03-17	D614G	3	3	3	3	3
B.1.9.3	2020-03-17	D614G	3	3	3	3	3
B.1.1.198	2020-03-18	D614G	3	3	3	3	3
B.1.1.3	2020-03-18	T478I	2	4	3	3	4
B.1.1.3	2020-03-18	D614G	3	3	3	3	3
B.1.1.409	2020-03-18	D614G	3	3	3	3	3
B.1.110.1	2020-03-18	D614G	3	3	3	3	3
B.1.23	2020-03-18	D614G	3	3	3	3	3
B.1.268	2020-03-18	D614G	3	3	3	3	3
B.1.270	2020-03-18	D614G	3	3	3	3	3
B.1.308	2020-03-18	W152L	1	4	2	3	3
B.1.308	2020-03-18	D614G	3	3	3	3	3
B.1.329	2020-03-18	D614G	3	3	3	3	3
B.1.40	2020-03-18	D614G	3	3	3	3	3
B.1.459	2020-03-18	D614G	3	3	3	3	3
B.1.459	2020-03-18	S689R	1	1	1	2	2
B.1.81	2020-03-18	D614G	3	3	3	3	3
B.1.1.137	2020-03-19	D614G	3	3	3	3	3
B.1.1.275	2020-03-19	D614G	3	3	3	3	3
B.1.1.317	2020-03-19	D138Y	2	3	3	3	3
B.1.1.317	2020-03-19	S477N	3	2	2	2	3
B.1.1.317	2020-03-19	D614G	3	3	3	3	3
B.1.1.317	2020-03-19	Q675R	2	3	3	3	3
B.1.1.317	2020-03-19	A845S	2	3	3	3	3
B.1.1.317	2020-03-19	A522S	3	3	3	3	3
B.1.1.339	2020-03-19	D614G	3	3	3	3	3
B.1.1.339	2020-03-19	I870V	1	2	2	2	4
B.1.1.398	2020-03-19	D614G	3	3	3	3	3
B.1.1.416	2020-03-19	D614G	3	3	3	3	3
B.1.1.54	2020-03-19	D614G	3	3	3	3	3
B.1.124	2020-03-19	D614G	3	3	3	3	3
B.1.170	2020-03-19	D614G	3	3	3	3	3
B.1.225	2020-03-19	D614G	3	3	3	3	3
B.1.229	2020-03-19	D614G	3	3	3	3	3
B.1.263	2020-03-19	D614G	3	3	3	3	3
B.1.370	2020-03-19	D614G	3	3	3	3	3
B.1.370	2020-03-19	S939F	2	3	3	3	3
B.1.597	2020-03-19	D614G	3	3	3	3	3
D.2	2020-03-19	S477N	3	2	2	2	3
D.2	2020-03-19	D614G	3	3	3	3	3
B.1.1.174	2020-03-20	D614G	3	3	3	3	3
B.1.1.191	2020-03-20	D614G	3	3	3	3	3
B.1.1.191	2020-03-20	G769V	2	3	3	3	3
B.1.1.213	2020-03-20	D614G	3	3	3	3	3
B.1.1.289	2020-03-20	D614G	3	3	3	3	3
B.1.1.296	2020-03-20	D614G	3	3	3	3	3
B.1.1.88	2020-03-20	D614G	3	3	3	3	3
B.1.298	2020-03-20	D614G	3	3	3	3	3
B.1.334	2020-03-20	D614G	3	3	3	3	3
B.1.35	2020-03-20	D614G	3	3	3	3	3
B.1.577	2020-03-20	D614G	3	3	3	3	3
B.1.83	2020-03-20	D614G	3	3	3	3	3
C.14	2020-03-20	D614G	3	3	3	3	3
B.1.1.162	2020-03-21	D614G	3	3	3	3	3
B.1.1.192	2020-03-21	D614G	3	3	3	3	3
B.1.1.210	2020-03-21	D614G	3	3	3	3	3
B.1.1.27	2020-03-21	D614G	3	3	3	3	3
B.1.1.270	2020-03-21	D614G	3	3	3	3	3
B.1.1.279	2020-03-21	R21I	2	3	3	3	3
B.1.1.279	2020-03-21	D614G	3	3	3	3	3
B.1.1.41	2020-03-21	D614G	3	3	3	3	3
B.1.1.83	2020-03-21	D614G	3	3	3	3	3
B.1.177.20	2020-03-21	A222V	3	4	3	2	3
B.1.177.20	2020-03-21	E583D	4	3	2	3	3
B.1.177.20	2020-03-21	D614G	3	3	3	3	3
B.1.177.7	2020-03-21	L18F	2	3	3	3	3
B.1.177.7	2020-03-21	A222V	3	4	3	2	3
B.1.177.7	2020-03-21	D614G	3	3	3	3	3
B.1.221.2	2020-03-21	S98F	2	3	3	3	3
B.1.221.2	2020-03-21	D614G	3	3	3	3	3
B.1.518	2020-03-21	D614G	3	3	3	3	3
B.1.521	2020-03-21	D614G	3	3	3	3	3
B.1.9.4	2020-03-21	D614G	3	3	3	3	3
B.1.1.133	2020-03-22	D614G	3	3	3	3	3
B.1.1.181	2020-03-22	D614G	3	3	3	3	3
B.1.1.208	2020-03-22	D614G	3	3	3	3	3
B.1.1.411	2020-03-22	D614G	3	3	3	3	3
B.1.1.411	2020-03-22	T19R	2	4	3	3	3
B.1.1.487	2020-03-22	T22I	2	3	3	3	3
B.1.1.487	2020-03-22	T385I	1	2	4	2	4
B.1.1.487	2020-03-22	L452R	1	1	2	2	2
B.1.1.487	2020-03-22	D614G	3	3	3	3	3
B.1.219	2020-03-22	E281V	1	2	2	2	4
B.1.219	2020-03-22	D614G	3	3	3	3	3
B.1.240	2020-03-22	D614G	3	3	3	3	3
B.1.256	2020-03-22	D614G	3	3	3	3	3
B.1.276	2020-03-22	D614G	3	3	3	3	3
B.1.434	2020-03-22	D614G	3	3	3	3	3
B.1.1.171	2020-03-23	D614G	3	3	3	3	3
B.1.1.220	2020-03-23	D614G	3	3	3	3	3
B.1.1.326	2020-03-23	D614G	3	3	3	3	3
B.1.1.350	2020-03-23	D614G	3	3	3	3	3
B.1.1.37	2020-03-23	D614G	3	3	3	3	3
B.1.1.436	2020-03-23	D614G	3	3	3	3	3
B.1.1.49	2020-03-23	D614G	3	3	3	3	3
B.1.243	2020-03-23	D614G	3	3	3	3	3
B.1.243	2020-03-23	P681H	1	3	3	2	4
B.1.44	2020-03-23	D614G	3	3	3	3	3
B.1.44	2020-03-23	D936Y	2	3	3	3	3
B.1.567	2020-03-23	D614G	3	3	3	3	3
B.1.67	2020-03-23	D614G	3	3	3	3	3
L.2	2020-03-23	D614G	3	3	3	3	3
B.1.1.267	2020-03-24	D614G	3	3	3	3	3
B.1.245	2020-03-24	D614G	3	3	3	3	3
B.1.267	2020-03-24	D614G	3	3	3	3	3
B.1.267	2020-03-24	C1250F	4	2	2	3	4
B.1.330	2020-03-24	D614G	3	3	3	3	3
B.1.527	2020-03-24	D614G	3	3	3	3	3
B.1.533	2020-03-24	D614G	3	3	3	3	3
B.1.542	2020-03-24	D614G	3	3	3	3	3
B.1.564	2020-03-24	D614G	3	3	3	3	3
B.1.564	2020-03-24	E780Q	2	4	4	2	2
B.1.97	2020-03-24	D614G	3	3	3	3	3
B.1.1.190	2020-03-25	D614G	3	3	3	3	3
B.1.1.406	2020-03-25	D614G	3	3	3	3	3
B.1.1.406	2020-03-25	G1251V	3	3	2	3	4
B.1.1.43	2020-03-25	D614G	3	3	3	3	3
B.1.1.462	2020-03-25	E583D	4	3	2	3	3
B.1.1.462	2020-03-25	D614G	3	3	3	3	3
B.1.1.74	2020-03-25	D614G	3	3	3	3	3
B.1.258	2020-03-25	N439K	2	3	3	3	4
B.1.258	2020-03-25	D614G	3	3	3	3	3
B.1.315	2020-03-25	D614G	3	3	3	3	3
B.1.315	2020-03-25	N856S	1	1	4	1	2
B.1.390	2020-03-25	D614G	3	3	3	3	3
B.1.471	2020-03-25	D614G	3	3	3	3	3
B.1.479	2020-03-25	D614G	3	3	3	3	3
B.1.485	2020-03-25	D614G	3	3	3	3	3
B.1.520	2020-03-25	D614G	3	3	3	3	3
B.1.525	2020-03-25	Q52R	3	4	3	3	3
B.1.525	2020-03-25	A67V	3	4	3	3	3
B.1.525	2020-03-25	E484K	3	2	4	2	4
B.1.525	2020-03-25	D614G	3	3	3	3	3
B.1.525	2020-03-25	Q677H	2	3	3	3	3
B.1.525	2020-03-25	F888L	1	1	1	2	4
B.1.535	2020-03-25	D614G	3	3	3	3	3
B.1.545	2020-03-25	D614G	3	3	3	3	3
N.1	2020-03-25	D614G	3	3	3	3	3
N.4	2020-03-25	D614G	3	3	3	3	3
B.1.1.249	2020-03-26	P251L	4	2	4	2	3
B.1.1.249	2020-03-26	D614G	3	3	3	3	3
B.1.1.282	2020-03-26	D614G	3	3	3	3	3
B.1.489	2020-03-26	D614G	3	3	3	3	3
B.1.489	2020-03-26	D936Y	2	3	3	3	3
B.1.489	2020-03-26	A1020V	2	3	3	3	3
L.1	2020-03-26	D614G	3	3	3	3	3
L.1	2020-03-26	M1237T	4	2	3	2	4
B.1.1.48	2020-03-27	D614G	3	3	3	3	3
B.1.120	2020-03-27	D614G	3	3	3	3	3
B.1.161	2020-03-27	D614G	3	3	3	3	3
B.1.167	2020-03-27	D614G	3	3	3	3	3
B.1.252	2020-03-27	D614G	3	3	3	3	3
B.1.540	2020-03-27	D614G	3	3	3	3	3
B.1.594	2020-03-27	A344S	3	4	4	2	4
B.1.594	2020-03-27	D614G	3	3	3	3	3
B.1.617.2	2020-03-27	T19R	2	4	3	3	3
B.1.617.2	2020-03-27	L452R	1	1	2	2	2
B.1.617.2	2020-03-27	T478K	2	4	3	3	4
B.1.617.2	2020-03-27	D614G	3	3	3	3	3
B.1.617.2	2020-03-27	P681R	1	3	3	2	4
B.1.1.134	2020-03-28	D614G	3	3	3	3	3
B.1.1.200	2020-03-28	D614G	3	3	3	3	3
B.1.1.232	2020-03-28	D614G	3	3	3	3	3
B.1.1.366	2020-03-28	D614G	3	3	3	3	3
B.1.143	2020-03-28	D614G	3	3	3	3	3
B.1.187	2020-03-28	D614G	3	3	3	3	3
B.1.248	2020-03-28	D614G	3	3	3	3	3
BA.2	2020-03-28	T19I	2	4	3	3	3
BA.2	2020-03-28	V213G	3	4	3	3	3
BA.2	2020-03-28	G339D	1	1	4	2	2
BA.2	2020-03-28	S371F	1	1	1	1	2
BA.2	2020-03-28	S373P	1	2	2	2	2
BA.2	2020-03-28	S375F	1	2	1	1	2
BA.2	2020-03-28	T376A	1	1	1	2	2
BA.2	2020-03-28	D405N	1	1	1	1	2
BA.2	2020-03-28	R408S	2	4	3	3	3
BA.2	2020-03-28	K417N	4	4	4	2	3
BA.2	2020-03-28	N440K	1	1	2	2	4
BA.2	2020-03-28	S477N	3	2	2	2	3
BA.2	2020-03-28	T478K	2	4	3	3	4
BA.2	2020-03-28	E484A	3	2	4	2	4
BA.2	2020-03-28	Q493R	1	1	1	1	2
BA.2	2020-03-28	Q498R	1	1	1	1	2
BA.2	2020-03-28	N501Y	1	1	1	2	4
BA.2	2020-03-28	Y505H	1	1	1	2	2
BA.2	2020-03-28	D614G	3	3	3	3	3
BA.2	2020-03-28	H655Y	2	3	3	3	3
BA.2	2020-03-28	N679K	1	1	2	2	2
BA.2	2020-03-28	P681H	1	3	3	2	4
BA.2	2020-03-28	N764K	1	2	2	2	2
BA.2	2020-03-28	D796Y	3	4	4	2	4
BA.2	2020-03-28	Q954H	1	1	1	2	4
BA.2	2020-03-28	N969K	1	1	1	2	1
B.1.1.221	2020-03-29	D614G	3	3	3	3	3
B.1.1.400	2020-03-29	S13I	4	3	2	3	3
B.1.1.400	2020-03-29	D614G	3	3	3	3	3
B.1.1.50	2020-03-29	D614G	3	3	3	3	3
B.1.116	2020-03-29	D614G	3	3	3	3	3
B.1.289	2020-03-29	H245Y	2	3	3	3	3
B.1.289	2020-03-29	D614G	3	3	3	3	3
B.1.476	2020-03-29	S477N	3	2	2	2	3
B.1.476	2020-03-29	D614G	3	3	3	3	3
B.1.523	2020-03-29	D614G	3	3	3	3	3
B.1.559	2020-03-29	D614G	3	3	3	3	3
B.1.576	2020-03-29	D614G	3	3	3	3	3
B.1.607	2020-03-29	D614G	3	3	3	3	3
B.1.607	2020-03-29	D936Y	2	3	3	3	3
C.13	2020-03-29	D614G	3	3	3	3	3
B.1.1.114	2020-03-30	D614G	3	3	3	3	3
B.1.1.154	2020-03-30	D614G	3	3	3	3	3
B.1.1.363	2020-03-30	R21I	2	3	3	3	3
B.1.1.363	2020-03-30	D614G	3	3	3	3	3
B.1.1.363	2020-03-30	R847K	4	3	3	3	4
B.1.1.391	2020-03-30	D614G	3	3	3	3	3
B.1.1.51	2020-03-30	D614G	3	3	3	3	3
B.1.117	2020-03-30	D614G	3	3	3	3	3
B.1.177.12	2020-03-30	A222V	3	4	3	2	3
B.1.177.12	2020-03-30	D614G	3	3	3	3	3
B.1.3	2020-03-30	D614G	3	3	3	3	3
B.1.3	2020-03-30	Q675R	2	3	3	3	3
B.1.372	2020-03-30	D614G	3	3	3	3	3
B.1.372	2020-03-30	D936Y	2	3	3	3	3
B.1.431	2020-03-30	D614G	3	3	3	3	3
B.1.552	2020-03-30	D614G	3	3	3	3	3
B.1.552	2020-03-30	T859I	2	3	3	3	3
B.1.552	2020-03-30	P1263L	2	3	3	3	3
B.1.592	2020-03-30	D614G	3	3	3	3	3
B.1.598	2020-03-30	D614G	3	3	3	3	3
B.1.1.101	2020-03-31	D614G	3	3	3	3	3
B.1.1.121	2020-03-31	D614G	3	3	3	3	3
B.1.1.185	2020-03-31	D614G	3	3	3	3	3
B.1.1.25	2020-03-31	D614G	3	3	3	3	3
B.1.1.261	2020-03-31	D614G	3	3	3	3	3
B.1.1.294	2020-03-31	D614G	3	3	3	3	3
B.1.1.304	2020-03-31	A27S	4	3	3	3	3
B.1.1.304	2020-03-31	D614G	3	3	3	3	3
B.1.1.4	2020-03-31	D614G	3	3	3	3	3
B.1.1.57	2020-03-31	D614G	3	3	3	3	3
B.1.149	2020-03-31	D614G	3	3	3	3	3
B.1.169	2020-03-31	D614G	3	3	3	3	3
B.1.177.77	2020-03-31	A222V	3	4	3	2	3
B.1.177.77	2020-03-31	D614G	3	3	3	3	3
B.1.311	2020-03-31	D614G	3	3	3	3	3
B.1.84	2020-03-31	D614G	3	3	3	3	3
B.1.9.1	2020-03-31	D614G	3	3	3	3	3
B.1.9.1	2020-03-31	F1121L	4	2	1	1	1
BA.5.1.10	2020-03-31	T19I	2	4	3	3	3
BA.5.1.10	2020-03-31	V213G	3	4	3	3	3
BA.5.1.10	2020-03-31	G339D	1	1	4	2	2
BA.5.1.10	2020-03-31	S371F	1	1	1	1	2
BA.5.1.10	2020-03-31	S373P	1	2	2	2	2
BA.5.1.10	2020-03-31	S375F	1	2	1	1	2
BA.5.1.10	2020-03-31	T376A	1	1	1	2	2
BA.5.1.10	2020-03-31	D405N	1	1	1	1	2
BA.5.1.10	2020-03-31	R408S	2	4	3	3	3
BA.5.1.10	2020-03-31	K417N	4	4	4	2	3
BA.5.1.10	2020-03-31	N440K	1	1	2	2	4
BA.5.1.10	2020-03-31	L452R	1	1	2	2	2
BA.5.1.10	2020-03-31	S477N	3	2	2	2	3
BA.5.1.10	2020-03-31	T478K	2	4	3	3	4
BA.5.1.10	2020-03-31	E484A	3	2	4	2	4
BA.5.1.10	2020-03-31	F486V	1	1	1	1	2
BA.5.1.10	2020-03-31	Q498R	1	1	1	1	2
BA.5.1.10	2020-03-31	N501Y	1	1	1	2	4
BA.5.1.10	2020-03-31	Y505H	1	1	1	2	2
BA.5.1.10	2020-03-31	D614G	3	3	3	3	3
BA.5.1.10	2020-03-31	H655Y	2	3	3	3	3
BA.5.1.10	2020-03-31	N679K	1	1	2	2	2
BA.5.1.10	2020-03-31	P681H	1	3	3	2	4
BA.5.1.10	2020-03-31	N764K	1	2	2	2	2
BA.5.1.10	2020-03-31	D796Y	3	4	4	2	4
BA.5.1.10	2020-03-31	Q954H	1	1	1	2	4
BA.5.1.10	2020-03-31	N969K	1	1	1	2	1
C.8	2020-03-31	D614G	3	3	3	3	3
AY.34.1	2020-04-01	T19R	2	4	3	3	3
AY.34.1	2020-04-01	T95I	2	3	3	3	3
AY.34.1	2020-04-01	L452R	1	1	2	2	2
AY.34.1	2020-04-01	T478K	2	4	3	3	4
AY.34.1	2020-04-01	D614G	3	3	3	3	3
AY.34.1	2020-04-01	Q677H	2	3	3	3	3
AY.34.1	2020-04-01	P681R	1	3	3	2	4
AY.34.1	2020-04-01	L1265F	4	3	2	3	3
B.1.1.163	2020-04-01	D614G	3	3	3	3	3
B.1.1.464	2020-04-01	D614G	3	3	3	3	3
B.1.1.485	2020-04-01	D614G	3	3	3	3	3
B.1.292	2020-04-01	D614G	3	3	3	3	3
B.1.301	2020-04-01	D614G	3	3	3	3	3
B.1.310	2020-04-01	D614G	3	3	3	3	3
B.1.313	2020-04-01	D253G	2	4	3	3	3
B.1.313	2020-04-01	D614G	3	3	3	3	3
B.1.358	2020-04-01	D614G	3	3	3	3	3
B.1.473	2020-04-01	D138Y	2	3	3	3	3
B.1.473	2020-04-01	N354D	1	3	2	3	3
B.1.473	2020-04-01	D614G	3	3	3	3	3
B.1.473	2020-04-01	P521R	1	2	2	2	4
B.1.503	2020-04-01	D614G	3	3	3	3	3
B.1.96	2020-04-01	D614G	3	3	3	3	3
C.11	2020-04-01	T307I	2	3	3	3	3
C.11	2020-04-01	D614G	3	3	3	3	3
B.1.1.178	2020-04-02	D614G	3	3	3	3	3
B.1.1.26	2020-04-02	D614G	3	3	3	3	3
B.1.417	2020-04-02	D614G	3	3	3	3	3
B.1.417	2020-04-02	S939F	2	3	3	3	3
B.1.529	2020-04-02	D614G	3	3	3	3	3
B.1.529	2020-04-02	N679K	1	1	2	2	2
B.1.572	2020-04-02	D614G	3	3	3	3	3
B.1.1.184	2020-04-03	D614G	3	3	3	3	3
B.1.1.263	2020-04-03	D614G	3	3	3	3	3
B.1.1.274	2020-04-03	D614G	3	3	3	3	3
B.1.1.360	2020-04-03	R21I	2	3	3	3	3
B.1.1.360	2020-04-03	D614G	3	3	3	3	3
B.1.1.95	2020-04-03	D614G	3	3	3	3	3
B.1.110.2	2020-04-03	D614G	3	3	3	3	3
B.1.110.2	2020-04-03	P631S	4	2	2	3	4
B.1.134	2020-04-03	D614G	3	3	3	3	3
B.1.198	2020-04-03	D614G	3	3	3	3	3
B.1.362	2020-04-03	L452R	1	1	2	2	2
B.1.362	2020-04-03	D614G	3	3	3	3	3
B.1.362	2020-04-03	L1063F	4	2	4	2	4
BA.2.10	2020-04-03	T19I	2	4	3	3	3
BA.2.10	2020-04-03	V213G	3	4	3	3	3
BA.2.10	2020-04-03	G339D	1	1	4	2	2
BA.2.10	2020-04-03	S371F	1	1	1	1	2
BA.2.10	2020-04-03	S373P	1	2	2	2	2
BA.2.10	2020-04-03	S375F	1	2	1	1	2
BA.2.10	2020-04-03	T376A	1	1	1	2	2
BA.2.10	2020-04-03	D405N	1	1	1	1	2
BA.2.10	2020-04-03	R408S	2	4	3	3	3
BA.2.10	2020-04-03	K417N	4	4	4	2	3
BA.2.10	2020-04-03	N440K	1	1	2	2	4
BA.2.10	2020-04-03	S477N	3	2	2	2	3
BA.2.10	2020-04-03	T478K	2	4	3	3	4
BA.2.10	2020-04-03	E484A	3	2	4	2	4
BA.2.10	2020-04-03	Q493R	1	1	1	1	2
BA.2.10	2020-04-03	Q498R	1	1	1	1	2
BA.2.10	2020-04-03	N501Y	1	1	1	2	4
BA.2.10	2020-04-03	Y505H	1	1	1	2	2
BA.2.10	2020-04-03	D614G	3	3	3	3	3
BA.2.10	2020-04-03	H655Y	2	3	3	3	3
BA.2.10	2020-04-03	N679K	1	1	2	2	2
BA.2.10	2020-04-03	P681H	1	3	3	2	4
BA.2.10	2020-04-03	N764K	1	2	2	2	2
BA.2.10	2020-04-03	D796Y	3	4	4	2	4
BA.2.10	2020-04-03	Q954H	1	1	1	2	4
BA.2.10	2020-04-03	N969K	1	1	1	2	1
C.22	2020-04-03	D614G	3	3	3	3	3
B.1.1.138	2020-04-04	D614G	3	3	3	3	3
B.1.1.222	2020-04-04	D614G	3	3	3	3	3
B.1.1.222	2020-04-04	T732A	4	3	2	3	3
B.1.1.459	2020-04-04	D614G	3	3	3	3	3
B.1.1.459	2020-04-04	A846V	3	3	3	3	3
B.1.177.11	2020-04-04	A222V	3	4	3	2	3
B.1.177.11	2020-04-04	D614G	3	3	3	3	3
B.1.177.11	2020-04-04	D1163Y	3	3	3	3	3
B.1.177.11	2020-04-04	G1167V	1	2	2	3	4
B.1.1.370	2020-04-05	D614G	3	3	3	3	3
B.1.1.379	2020-04-05	R21I	2	3	3	3	3
B.1.1.379	2020-04-05	D614G	3	3	3	3	3
B.1.1.424	2020-04-05	D614G	3	3	3	3	3
B.1.1.98	2020-04-05	D614G	3	3	3	3	3
B.1.475	2020-04-05	D614G	3	3	3	3	3
B.1.620	2020-04-05	P26S	3	3	3	3	3
B.1.620	2020-04-05	V126A	1	1	4	2	4
B.1.620	2020-04-05	S477N	3	2	2	2	3
B.1.620	2020-04-05	E484K	3	2	4	2	4
B.1.620	2020-04-05	D614G	3	3	3	3	3
B.1.620	2020-04-05	P681H	1	3	3	2	4
B.1.620	2020-04-05	T1027I	2	4	3	3	4
B.1.620	2020-04-05	D1118H	1	2	2	2	2
B.1.1.172	2020-04-06	D614G	3	3	3	3	3
B.1.1.82	2020-04-06	D614G	3	3	3	3	3
B.1.112	2020-04-06	D614G	3	3	3	3	3
B.1.137	2020-04-06	D614G	3	3	3	3	3
B.1.232	2020-04-06	D614G	3	3	3	3	3
B.1.254	2020-04-06	D614G	3	3	3	3	3
B.1.416	2020-04-06	D614G	3	3	3	3	3
B.1.557	2020-04-06	D614G	3	3	3	3	3
B.1.558	2020-04-06	D614G	3	3	3	3	3
B.1.613	2020-04-06	D614G	3	3	3	3	3
C.35	2020-04-06	D614G	3	3	3	3	3
B.1.1.117	2020-04-07	D614G	3	3	3	3	3
B.1.1.117	2020-04-07	A688V	3	3	3	3	3
B.1.1.244	2020-04-07	G257S	3	3	3	3	3
B.1.1.244	2020-04-07	D614G	3	3	3	3	3
B.1.1.244	2020-04-07	G75R	1	3	3	3	3
B.1.1.244	2020-04-07	D1260Y	1	3	3	3	3
B.1.1.99	2020-04-07	D614G	3	3	3	3	3
B.1.231	2020-04-07	D614G	3	3	3	3	3
B.1.397	2020-04-07	D614G	3	3	3	3	3
B.1.403	2020-04-07	D614G	3	3	3	3	3
B.1.428.2	2020-04-07	D614G	3	3	3	3	3
B.1.493	2020-04-07	D614G	3	3	3	3	3
B.1.600	2020-04-07	D614G	3	3	3	3	3
P.1	2020-04-07	L18F	2	3	3	3	3
P.1	2020-04-07	T20N	2	4	2	3	3
P.1	2020-04-07	P26S	3	3	3	3	3
P.1	2020-04-07	D138Y	2	3	3	3	3
P.1	2020-04-07	R190S	1	1	2	2	4
P.1	2020-04-07	K417T	4	4	4	2	3
P.1	2020-04-07	E484K	3	2	4	2	4
P.1	2020-04-07	N501Y	1	1	1	2	4
P.1	2020-04-07	D614G	3	3	3	3	3
P.1	2020-04-07	H655Y	2	3	3	3	3
P.1	2020-04-07	T1027I	2	4	3	3	4
P.1	2020-04-07	V1176F	1	2	2	3	3
B.1.1.29	2020-04-08	D614G	3	3	3	3	3
B.1.1.58	2020-04-08	D614G	3	3	3	3	3
B.1.281	2020-04-08	D614G	3	3	3	3	3
B.1.560	2020-04-08	D614G	3	3	3	3	3
B.1.1.129	2020-04-09	D614G	3	3	3	3	3
B.1.1.197	2020-04-09	D614G	3	3	3	3	3
B.1.1.344	2020-04-09	D614G	3	3	3	3	3
B.1.103	2020-04-09	D614G	3	3	3	3	3
B.1.139	2020-04-09	D614G	3	3	3	3	3
B.1.180	2020-04-09	D614G	3	3	3	3	3
B.1.206	2020-04-09	D614G	3	3	3	3	3
B.1.239	2020-04-09	D614G	3	3	3	3	3
B.1.470	2020-04-09	D614G	3	3	3	3	3
A.21	2020-04-10	D614N	3	3	3	3	3
A.21	2020-04-10	R190S	1	1	2	2	4
A.21	2020-04-10	L452R	1	1	2	2	2
B.1.1.122	2020-04-10	T20I	2	4	2	3	3
B.1.1.122	2020-04-10	D614G	3	3	3	3	3
B.1.1.500	2020-04-10	D614G	3	3	3	3	3
B.1.1.87	2020-04-10	D614G	3	3	3	3	3
B.1.1.87	2020-04-10	G1171V	1	1	4	2	4
B.1.435	2020-04-10	D614G	3	3	3	3	3
B.1.1.189	2020-04-11	D614G	3	3	3	3	3
B.1.1.402	2020-04-11	D614G	3	3	3	3	3
B.1.249	2020-04-11	G257D	3	3	3	3	3
B.1.249	2020-04-11	D614G	3	3	3	3	3
B.1.36.8	2020-04-11	D614G	3	3	3	3	3
B.1.427	2020-04-11	S13I	4	3	2	3	3
B.1.427	2020-04-11	W152C	1	4	2	3	3
B.1.427	2020-04-11	L452R	1	1	2	2	2
B.1.427	2020-04-11	D614G	3	3	3	3	3
B.1.596	2020-04-11	D614G	3	3	3	3	3
B.1.596	2020-04-11	V1228L	3	3	3	3	3
A.2.5.2	2020-04-12	L452R	1	1	2	2	2
A.2.5.2	2020-04-12	D614G	3	3	3	3	3
B.1.1.148	2020-04-12	D614G	3	3	3	3	3
B.1.1.55	2020-04-12	D614G	3	3	3	3	3
B.1.1.55	2020-04-12	Q1208H	1	1	1	1	2
B.1.1.55	2020-04-12	S1252P	1	2	3	3	3
B.1.177.73	2020-04-12	A222V	3	4	3	2	3
B.1.177.73	2020-04-12	D614G	3	3	3	3	3
B.1.177.73	2020-04-12	Q1071L	1	1	4	2	4
B.1.1.480	2020-04-13	D614G	3	3	3	3	3
B.1.1.480	2020-04-13	E1258V	1	1	1	1	1
B.1.579	2020-04-13	D614G	3	3	3	3	3
B.1.579	2020-04-13	Q787R	1	1	4	1	2
P.2	2020-04-13	E484K	3	2	4	2	4
P.2	2020-04-13	D614G	3	3	3	3	3
P.2	2020-04-13	V1176F	1	2	2	3	3
A.2.5.1	2020-04-14	L452R	1	1	2	2	2
A.2.5.1	2020-04-14	D614G	3	3	3	3	3
B.1.1.516	2020-04-14	D614G	3	3	3	3	3
B.1.189	2020-04-14	D614G	3	3	3	3	3
B.1.381	2020-04-14	D614G	3	3	3	3	3
A.2.5	2020-04-15	L452R	1	1	2	2	2
A.2.5	2020-04-15	D614G	3	3	3	3	3
B.1.1.119	2020-04-15	D614G	3	3	3	3	3
B.1.1.34	2020-04-15	D614G	3	3	3	3	3
B.1.1.399	2020-04-15	D614G	3	3	3	3	3
B.1.241	2020-04-15	D614G	3	3	3	3	3
B.1.361	2020-04-15	D614G	3	3	3	3	3
B.1.400	2020-04-15	D614G	3	3	3	3	3
B.1.448	2020-04-15	D614G	3	3	3	3	3
BA.2.12.1	2020-04-15	T19I	2	4	3	3	3
BA.2.12.1	2020-04-15	V213G	3	4	3	3	3
BA.2.12.1	2020-04-15	G339D	1	1	4	2	2
BA.2.12.1	2020-04-15	S371F	1	1	1	1	2
BA.2.12.1	2020-04-15	S373P	1	2	2	2	2
BA.2.12.1	2020-04-15	S375F	1	2	1	1	2
BA.2.12.1	2020-04-15	T376A	1	1	1	2	2
BA.2.12.1	2020-04-15	D405N	1	1	1	1	2
BA.2.12.1	2020-04-15	R408S	2	4	3	3	3
BA.2.12.1	2020-04-15	K417N	4	4	4	2	3
BA.2.12.1	2020-04-15	N440K	1	1	2	2	4
BA.2.12.1	2020-04-15	L452Q	1	1	2	2	2
BA.2.12.1	2020-04-15	S477N	3	2	2	2	3
BA.2.12.1	2020-04-15	T478K	2	4	3	3	4
BA.2.12.1	2020-04-15	E484A	3	2	4	2	4
BA.2.12.1	2020-04-15	Q493R	1	1	1	1	2
BA.2.12.1	2020-04-15	Q498R	1	1	1	1	2
BA.2.12.1	2020-04-15	N501Y	1	1	1	2	4
BA.2.12.1	2020-04-15	Y505H	1	1	1	2	2
BA.2.12.1	2020-04-15	D614G	3	3	3	3	3
BA.2.12.1	2020-04-15	H655Y	2	3	3	3	3
BA.2.12.1	2020-04-15	N679K	1	1	2	2	2
BA.2.12.1	2020-04-15	P681H	1	3	3	2	4
BA.2.12.1	2020-04-15	S704L	1	2	2	2	3
BA.2.12.1	2020-04-15	N764K	1	2	2	2	2
BA.2.12.1	2020-04-15	D796Y	3	4	4	2	4
BA.2.12.1	2020-04-15	Q954H	1	1	1	2	4
BA.2.12.1	2020-04-15	N969K	1	1	1	2	1
B.1.1.14	2020-04-16	D614G	3	3	3	3	3
B.1.637	2020-04-16	D80G	2	3	3	3	3
B.1.637	2020-04-16	F157S	1	2	2	2	3
B.1.637	2020-04-16	L452R	1	1	2	2	2
B.1.637	2020-04-16	D614G	3	3	3	3	3
B.1.637	2020-04-16	T859N	2	3	3	3	3
C.1	2020-04-16	D614G	3	3	3	3	3
B.1.1.335	2020-04-17	D614G	3	3	3	3	3
B.1.515	2020-04-17	T22N	2	3	3	3	3
B.1.515	2020-04-17	D614G	3	3	3	3	3
B.1.515	2020-04-17	S698L	4	3	3	3	3
N.3	2020-04-17	D614G	3	3	3	3	3
B.1.1.110	2020-04-18	T299I	2	3	3	3	3
B.1.1.110	2020-04-18	D614G	3	3	3	3	3
B.1.214	2020-04-18	D614G	3	3	3	3	3
B.1.451	2020-04-18	D614G	3	3	3	3	3
B.1.509	2020-04-18	D614G	3	3	3	3	3
C.6	2020-04-18	D614G	3	3	3	3	3
B.1.1.382	2020-04-19	D614G	3	3	3	3	3
B.1.377	2020-04-19	D614G	3	3	3	3	3
B.1.495	2020-04-19	D614G	3	3	3	3	3
B.1.504	2020-04-19	D614G	3	3	3	3	3
C.27	2020-04-19	D614G	3	3	3	3	3
A.15	2020-04-20	D1084Y	3	3	3	3	3
B.1.1.127	2020-04-20	D614G	3	3	3	3	3
B.1.1.40	2020-04-20	D614G	3	3	3	3	3
B.1.1.46	2020-04-20	D614G	3	3	3	3	3
B.1.181	2020-04-20	D614G	3	3	3	3	3
B.1.445	2020-04-20	D614G	3	3	3	3	3
B.1.462	2020-04-20	D614G	3	3	3	3	3
B.1.490	2020-04-20	D614G	3	3	3	3	3
B.1.490	2020-04-20	D936Y	2	3	3	3	3
B.1.506	2020-04-20	D614G	3	3	3	3	3
B.1.595.4	2020-04-20	D614G	3	3	3	3	3
B.1.9.2	2020-04-20	D614G	3	3	3	3	3
B.1.1.226	2020-04-21	D614G	3	3	3	3	3
B.1.1.465	2020-04-21	D614G	3	3	3	3	3
B.1.1.465	2020-04-21	P681H	1	3	3	2	4
B.1.145	2020-04-21	D614G	3	3	3	3	3
B.1.192	2020-04-21	D614G	3	3	3	3	3
B.1.274	2020-04-21	D614G	3	3	3	3	3
B.1.36.9	2020-04-21	D614G	3	3	3	3	3
B.1.36.9	2020-04-21	T859N	2	3	3	3	3
C.10	2020-04-22	D614G	3	3	3	3	3
B.1.106	2020-04-23	D614G	3	3	3	3	3
B.1.168	2020-04-23	D614G	3	3	3	3	3
B.1.528	2020-04-23	D614G	3	3	3	3	3
B.1.587	2020-04-23	D178G	1	2	2	2	4
B.1.587	2020-04-23	D614G	3	3	3	3	3
B.1.1.243	2020-04-24	V362F	1	1	1	1	1
B.1.1.243	2020-04-24	D614G	3	3	3	3	3
B.1.1.432	2020-04-24	D614G	3	3	3	3	3
B.1.164	2020-04-24	D614G	3	3	3	3	3
B.1.237	2020-04-24	D614G	3	3	3	3	3
B.1.36.10	2020-04-24	D614G	3	3	3	3	3
B.1.418	2020-04-24	D614G	3	3	3	3	3
B.1.326	2020-04-25	E554D	1	2	2	2	3
B.1.326	2020-04-25	D614G	3	3	3	3	3
B.1.341	2020-04-25	D614G	3	3	3	3	3
N.5	2020-04-25	Q414R	4	2	4	2	4
N.5	2020-04-25	D614G	3	3	3	3	3
N.5	2020-04-25	T778I	1	4	4	2	3
B.1.1.217	2020-04-26	D614G	3	3	3	3	3
B.1.1.388	2020-04-26	G181V	4	3	3	3	3
B.1.1.388	2020-04-26	D614G	3	3	3	3	3
B.1.309	2020-04-26	D614G	3	3	3	3	3
B.1.36.16	2020-04-26	D614G	3	3	3	3	3
B.1.399	2020-04-26	D614G	3	3	3	3	3
B.1.517	2020-04-26	N501T	1	1	1	2	4
B.1.517	2020-04-26	D614G	3	3	3	3	3
B.1.1.291	2020-04-27	D614G	3	3	3	3	3
B.1.1.395	2020-04-27	D614G	3	3	3	3	3
B.1.291	2020-04-27	D614G	3	3	3	3	3
B.1.366	2020-04-27	D614G	3	3	3	3	3
B.1.498	2020-04-27	D614G	3	3	3	3	3
B.1.501	2020-04-27	D614G	3	3	3	3	3
AY.25	2020-04-28	T19R	2	4	3	3	3
AY.25	2020-04-28	S112L	1	2	2	2	4
AY.25	2020-04-28	L452R	1	1	2	2	2
AY.25	2020-04-28	T478K	2	4	3	3	4
AY.25	2020-04-28	D614G	3	3	3	3	3
AY.25	2020-04-28	P681R	1	3	3	2	4
B.1.1.262	2020-04-28	D614G	3	3	3	3	3
B.1.1.262	2020-04-28	S698L	4	3	3	3	3
B.1.1.91	2020-04-28	D614G	3	3	3	3	3
B.1.335	2020-04-28	D614G	3	3	3	3	3
B.1.486	2020-04-28	Q183H	1	1	1	1	2
B.1.486	2020-04-28	T478K	2	4	3	3	4
B.1.486	2020-04-28	S494P	2	3	3	3	3
B.1.486	2020-04-28	N501Y	1	1	1	2	4
B.1.486	2020-04-28	D614G	3	3	3	3	3
B.1.486	2020-04-28	I870V	1	2	2	2	4
B.1.508	2020-04-28	D614G	3	3	3	3	3
C.26	2020-04-28	D614G	3	3	3	3	3
B.1.1.175	2020-04-29	N211Y	1	2	2	1	2
B.1.1.175	2020-04-29	D614G	3	3	3	3	3
B.1.1.201	2020-04-29	D614G	3	3	3	3	3
B.1.1.241	2020-04-29	V3G	1	2	2	2	2
B.1.1.241	2020-04-29	D614G	3	3	3	3	3
B.1.1.383	2020-04-29	D614G	3	3	3	3	3
B.1.316	2020-04-29	D614G	3	3	3	3	3
B.1.1.256	2020-04-30	D614G	3	3	3	3	3
B.1.1.348	2020-04-30	D614G	3	3	3	3	3
B.1.1.348	2020-04-30	G1167A	1	2	2	3	4
B.1.405	2020-04-30	D614G	3	3	3	3	3
B.1.405	2020-04-30	E654K	4	3	2	3	3
B.1.466	2020-04-30	D614G	3	3	3	3	3
C.28	2020-04-30	D614G	3	3	3	3	3
B.1.1.111	2020-05-01	D614G	3	3	3	3	3
B.1.1.149	2020-05-01	R21I	2	3	3	3	3
B.1.1.149	2020-05-01	D614G	3	3	3	3	3
B.1.1.514	2020-05-01	D614G	3	3	3	3	3
B.1.165	2020-05-01	D614G	3	3	3	3	3
B.1.432	2020-05-01	D614G	3	3	3	3	3
B.1.511	2020-05-02	D614G	3	3	3	3	3
B.1.554	2020-05-02	D614G	3	3	3	3	3
B.1.1.160	2020-05-03	D614G	3	3	3	3	3
B.1.1.169	2020-05-04	D614G	3	3	3	3	3
B.1.1.328	2020-05-04	D614G	3	3	3	3	3
B.1.1.381	2020-05-04	D614G	3	3	3	3	3
B.1.1.448	2020-05-04	D614G	3	3	3	3	3
B.1.247	2020-05-04	D614G	3	3	3	3	3
B.1.1.447	2020-05-05	D614G	3	3	3	3	3
B.1.497	2020-05-05	D614G	3	3	3	3	3
B.1.1.209	2020-05-06	D614G	3	3	3	3	3
B.1.1.97	2020-05-06	D614G	3	3	3	3	3
B.1.1.97	2020-05-06	H207R	1	4	4	2	2
AY.103	2020-05-07	T19R	2	4	3	3	3
AY.103	2020-05-07	L452R	1	1	2	2	2
AY.103	2020-05-07	T478K	2	4	3	3	4
AY.103	2020-05-07	D614G	3	3	3	3	3
AY.103	2020-05-07	P681R	1	3	3	2	4
AY.3	2020-05-07	T19R	2	4	3	3	3
AY.3	2020-05-07	L452R	1	1	2	2	2
AY.3	2020-05-07	T478K	2	4	3	3	4
AY.3	2020-05-07	D614G	3	3	3	3	3
AY.3	2020-05-07	P681R	1	3	3	2	4
B.1.425	2020-05-07	D614G	3	3	3	3	3
B.1.621	2020-05-07	T95I	2	3	3	3	3
B.1.621	2020-05-07	Y144S	2	3	3	3	3
B.1.621	2020-05-07	Y145N	3	3	3	3	3
B.1.621	2020-05-07	R346K	1	1	4	2	4
B.1.621	2020-05-07	E484K	3	2	4	2	4
B.1.621	2020-05-07	N501Y	1	1	1	2	4
B.1.621	2020-05-07	D614G	3	3	3	3	3
B.1.621	2020-05-07	P681H	1	3	3	2	4
C.32	2020-05-07	D614G	3	3	3	3	3
AE.1	2020-05-08	D614G	3	3	3	3	3
B.1.1.112	2020-05-08	D614G	3	3	3	3	3
B.1.36.23	2020-05-08	A522V	3	3	3	3	3
B.1.36.23	2020-05-08	D614G	3	3	3	3	3
B.1.1.115	2020-05-09	D614G	3	3	3	3	3
B.1.1.253	2020-05-09	D614G	3	3	3	3	3
B.1.1.440	2020-05-09	D614G	3	3	3	3	3
B.1.355	2020-05-09	D614G	3	3	3	3	3
B.1.1.202	2020-05-10	D614G	3	3	3	3	3
B.1.213	2020-05-10	D614G	3	3	3	3	3
AY.117	2020-05-11	T19R	2	4	3	3	3
AY.117	2020-05-11	T95I	2	3	3	3	3
AY.117	2020-05-11	L452R	1	1	2	2	2
AY.117	2020-05-11	T478K	2	4	3	3	4
AY.117	2020-05-11	D614G	3	3	3	3	3
AY.117	2020-05-11	P681R	1	3	3	2	4
AY.121	2020-05-11	T19R	2	4	3	3	3
AY.121	2020-05-11	T95I	2	3	3	3	3
AY.121	2020-05-11	L452R	1	1	2	2	2
AY.121	2020-05-11	T478K	2	4	3	3	4
AY.121	2020-05-11	D614G	3	3	3	3	3
AY.121	2020-05-11	P681R	1	3	3	2	4
AY.122	2020-05-11	T19R	2	4	3	3	3
AY.122	2020-05-11	L452R	1	1	2	2	2
AY.122	2020-05-11	T478K	2	4	3	3	4
AY.122	2020-05-11	D614G	3	3	3	3	3
AY.122	2020-05-11	P681R	1	3	3	2	4
AY.124	2020-05-11	T19R	2	4	3	3	3
AY.124	2020-05-11	T95I	2	3	3	3	3
AY.124	2020-05-11	L452R	1	1	2	2	2
AY.124	2020-05-11	T478K	2	4	3	3	4
AY.124	2020-05-11	D614G	3	3	3	3	3
AY.124	2020-05-11	P681R	1	3	3	2	4
AY.129	2020-05-11	T19R	2	4	3	3	3
AY.129	2020-05-11	T95I	2	3	3	3	3
AY.129	2020-05-11	L452R	1	1	2	2	2
AY.129	2020-05-11	T478K	2	4	3	3	4
AY.129	2020-05-11	D614G	3	3	3	3	3
AY.129	2020-05-11	P681R	1	3	3	2	4
AY.4	2020-05-11	T19R	2	4	3	3	3
AY.4	2020-05-11	T95I	2	3	3	3	3
AY.4	2020-05-11	L452R	1	1	2	2	2
AY.4	2020-05-11	T478K	2	4	3	3	4
AY.4	2020-05-11	D614G	3	3	3	3	3
AY.4	2020-05-11	P681R	1	3	3	2	4
AY.43	2020-05-11	T19R	2	4	3	3	3
AY.43	2020-05-11	L452R	1	1	2	2	2
AY.43	2020-05-11	T478K	2	4	3	3	4
AY.43	2020-05-11	D614G	3	3	3	3	3
AY.43	2020-05-11	P681R	1	3	3	2	4
AY.84	2020-05-11	T19R	2	4	3	3	3
AY.84	2020-05-11	L452R	1	1	2	2	2
AY.84	2020-05-11	T478K	2	4	3	3	4
AY.84	2020-05-11	D614G	3	3	3	3	3
AY.84	2020-05-11	P681R	1	3	3	2	4
B.1.1.118	2020-05-11	D614G	3	3	3	3	3
B.1.1.118	2020-05-11	S640F	4	3	3	3	3
B.1.1.218	2020-05-11	D614G	3	3	3	3	3
B.1.1.290	2020-05-11	D614G	3	3	3	3	3
B.1.1.376	2020-05-11	D614G	3	3	3	3	3
B.1.1.463	2020-05-11	D614G	3	3	3	3	3
B.1.1.529	2020-05-11	A67V	3	4	3	3	3
B.1.1.529	2020-05-11	T95I	2	3	3	3	3
B.1.1.529	2020-05-11	T547K	4	3	3	3	3
B.1.1.529	2020-05-11	D614G	3	3	3	3	3
B.1.1.529	2020-05-11	H655Y	2	3	3	3	3
B.1.1.529	2020-05-11	N679K	1	1	2	2	2
B.1.1.529	2020-05-11	P681H	1	3	3	2	4
B.1.1.529	2020-05-11	N764K	1	2	2	2	2
B.1.1.529	2020-05-11	D796Y	3	4	4	2	4
B.1.1.529	2020-05-11	N856K	1	1	4	1	2
B.1.1.529	2020-05-11	Q954H	1	1	1	2	4
B.1.1.529	2020-05-11	N969K	1	1	1	2	1
B.1.1.529	2020-05-11	L981F	1	1	4	1	2
B.1.1.529	2020-05-11	G339D	1	1	4	2	2
B.1.1.529	2020-05-11	T478K	2	4	3	3	4
C.23	2020-05-11	D614G	3	3	3	3	3
C.7	2020-05-11	D614G	3	3	3	3	3
AV.1	2020-05-12	D80G	2	3	3	3	3
AV.1	2020-05-12	T95I	2	3	3	3	3
AV.1	2020-05-12	N439K	2	3	3	3	4
AV.1	2020-05-12	E484K	3	2	4	2	4
AV.1	2020-05-12	D614G	3	3	3	3	3
AV.1	2020-05-12	P681H	1	3	3	2	4
AV.1	2020-05-12	I1130V	1	1	4	2	2
AV.1	2020-05-12	D1139H	1	3	3	2	4
B.1.1.186	2020-05-12	D138H	2	3	3	3	3
B.1.1.186	2020-05-12	D614G	3	3	3	3	3
B.1.408	2020-05-12	D614G	3	3	3	3	3
B.1.452	2020-05-12	D614G	3	3	3	3	3
B.1.548	2020-05-12	D614G	3	3	3	3	3
B.1.605	2020-05-12	D614G	3	3	3	3	3
B.1.605	2020-05-12	T1116N	1	1	1	1	2
B.1.1.147	2020-05-13	N185S	1	2	1	1	2
B.1.1.147	2020-05-13	D614G	3	3	3	3	3
B.1.1.228	2020-05-13	D614G	3	3	3	3	3
B.1.1.340	2020-05-13	D614G	3	3	3	3	3
B.1.1.318	2020-05-14	T95I	2	3	3	3	3
B.1.1.318	2020-05-14	E484K	3	2	4	2	4
B.1.1.318	2020-05-14	D614G	3	3	3	3	3
B.1.1.318	2020-05-14	P681H	1	3	3	2	4
B.1.1.318	2020-05-14	D796H	3	4	4	2	4
B.1.1.367	2020-05-14	D614G	3	3	3	3	3
B.1.1.458	2020-05-14	V213L	3	4	3	3	3
B.1.1.458	2020-05-14	D614G	3	3	3	3	3
B.1.1.506	2020-05-14	D614G	3	3	3	3	3
B.1.238	2020-05-14	D614G	3	3	3	3	3
B.1.1.237	2020-05-15	R21I	2	3	3	3	3
B.1.1.237	2020-05-15	D614G	3	3	3	3	3
B.1.1.310	2020-05-15	D614G	3	3	3	3	3
B.1.1.521	2020-05-15	D614G	3	3	3	3	3
B.1.478	2020-05-15	D614G	3	3	3	3	3
B.1.1.205	2020-05-16	D614G	3	3	3	3	3
B.1.1.442	2020-05-16	D614G	3	3	3	3	3
B.1.173	2020-05-16	D614G	3	3	3	3	3
B.1.538	2020-05-16	D614G	3	3	3	3	3
B.1.595.1	2020-05-16	D614G	3	3	3	3	3
B.1.595.1	2020-05-16	N1187Y	1	1	1	1	2
B.1.1.316	2020-05-17	D614G	3	3	3	3	3
B.1.1.316	2020-05-17	Q677H	2	3	3	3	3
B.1.1.316	2020-05-17	T732S	4	3	2	3	3
B.1.467	2020-05-17	D614G	3	3	3	3	3
B.4.8	2020-05-17	D614G	3	3	3	3	3
B.1.1.123	2020-05-18	D614G	3	3	3	3	3
B.1.1.123	2020-05-18	G769V	2	3	3	3	3
B.1.1.30	2020-05-18	R21I	2	3	3	3	3
B.1.1.30	2020-05-18	D614G	3	3	3	3	3
B.1.77	2020-05-18	S247G	1	3	3	3	4
B.1.77	2020-05-18	D614G	3	3	3	3	3
C.33	2020-05-18	D614G	3	3	3	3	3
B.1.1.269	2020-05-19	D614G	3	3	3	3	3
B.1.1.269	2020-05-19	D1084Y	3	3	3	3	3
B.1.1.354	2020-05-19	D138Y	2	3	3	3	3
B.1.1.354	2020-05-19	D614G	3	3	3	3	3
B.1.1.410	2020-05-19	D614G	3	3	3	3	3
B.1.1.423	2020-05-19	D614G	3	3	3	3	3
B.1.1.423	2020-05-19	H1101Y	1	1	1	2	3
B.1.1.86	2020-05-19	D614G	3	3	3	3	3
B.1.340	2020-05-19	D614G	3	3	3	3	3
C.4	2020-05-19	D614G	3	3	3	3	3
C.4	2020-05-19	A1078S	2	3	3	3	3
AY.44	2020-05-20	T19R	2	4	3	3	3
AY.44	2020-05-20	L452R	1	1	2	2	2
AY.44	2020-05-20	T478K	2	4	3	3	4
AY.44	2020-05-20	D614G	3	3	3	3	3
AY.44	2020-05-20	P681R	1	3	3	2	4
B.1.1.145	2020-05-20	D614G	3	3	3	3	3
B.1.1.203	2020-05-20	V6F	1	1	1	2	2
B.1.1.203	2020-05-20	D614G	3	3	3	3	3
B.1.1.203	2020-05-20	N679K	1	1	2	2	2
B.1.1.356	2020-05-20	D614G	3	3	3	3	3
B.1.1.90	2020-05-20	D614G	3	3	3	3	3
B.1.599	2020-05-20	M153I	4	3	3	3	3
B.1.599	2020-05-20	D614G	3	3	3	3	3
B.1.599	2020-05-20	Q675H	2	3	3	3	3
C.3	2020-05-20	V213L	3	4	3	3	3
C.3	2020-05-20	D614G	3	3	3	3	3
AY.47	2020-05-21	T19R	2	4	3	3	3
AY.47	2020-05-21	A222V	3	4	3	2	3
AY.47	2020-05-21	V289I	1	4	4	2	3
AY.47	2020-05-21	L452R	1	1	2	2	2
AY.47	2020-05-21	T478K	2	4	3	3	4
AY.47	2020-05-21	D614G	3	3	3	3	3
AY.47	2020-05-21	P681R	1	3	3	2	4
B.1.1.125	2020-05-21	D614G	3	3	3	3	3
B.1.1.255	2020-05-21	D614G	3	3	3	3	3
B.1.1.56	2020-05-21	D614G	3	3	3	3	3
B.1.1.56	2020-05-21	G769V	2	3	3	3	3
B.1.1.56	2020-05-21	A1078S	2	3	3	3	3
B.1.444	2020-05-21	D614G	3	3	3	3	3
B.1.606	2020-05-21	D614G	3	3	3	3	3
B.1.1.230	2020-05-22	D614G	3	3	3	3	3
B.1.1.284	2020-05-22	M153T	4	3	3	3	3
B.1.1.284	2020-05-22	D614G	3	3	3	3	3
B.1.1.299	2020-05-22	T549A	3	4	3	3	3
B.1.1.299	2020-05-22	D614G	3	3	3	3	3
B.1.1.301	2020-05-22	D614G	3	3	3	3	3
B.1.1.324	2020-05-22	D614G	3	3	3	3	3
B.1.1.45	2020-05-22	D614G	3	3	3	3	3
B.1.234	2020-05-22	D614G	3	3	3	3	3
B.1.1.266	2020-05-23	D614G	3	3	3	3	3
B.1.1.266	2020-05-23	S459Y	1	2	2	2	4
B.1.1.266	2020-05-23	M1229I	1	2	2	2	2
B.1.1.334	2020-05-23	D614G	3	3	3	3	3
B.1.1.334	2020-05-23	P681R	1	3	3	2	4
B.1.194	2020-05-23	D614G	3	3	3	3	3
B.1.194	2020-05-23	D1146H	2	3	3	3	4
B.1.328	2020-05-23	D614G	3	3	3	3	3
B.1.342	2020-05-23	D614G	3	3	3	3	3
B.1.36.33	2020-05-23	D614G	3	3	3	3	3
B.1.546	2020-05-23	D614G	3	3	3	3	3
B.1.546	2020-05-23	L822F	2	3	3	3	4
AY.118	2020-05-24	T19R	2	4	3	3	3
AY.118	2020-05-24	T95I	2	3	3	3	3
AY.118	2020-05-24	L452R	1	1	2	2	2
AY.118	2020-05-24	T478K	2	4	3	3	4
AY.118	2020-05-24	D614G	3	3	3	3	3
AY.118	2020-05-24	P681R	1	3	3	2	4
B.1.487	2020-05-24	D614G	3	3	3	3	3
B.1.487	2020-05-24	A701V	3	4	3	2	3
B.1.537	2020-05-24	D614G	3	3	3	3	3
B.1.1.273	2020-05-25	D614G	3	3	3	3	3
B.1.1.38	2020-05-25	D614G	3	3	3	3	3
B.1.1.404	2020-05-25	D614G	3	3	3	3	3
B.1.350.1	2020-05-25	D614G	3	3	3	3	3
B.1.350.1	2020-05-25	Q677H	2	3	3	3	3
B.1.350.1	2020-05-25	G1219C	3	4	2	2	2
B.1.458	2020-05-25	V213A	3	4	3	3	3
B.1.458	2020-05-25	D614G	3	3	3	3	3
B.1.1.258	2020-05-26	D614G	3	3	3	3	3
B.1.570	2020-05-26	D614G	3	3	3	3	3
B.1.570	2020-05-26	P681L	1	3	3	2	4
B.1.570	2020-05-26	T1120S	1	1	1	1	2
B.1.582	2020-05-26	D614G	3	3	3	3	3
C.17	2020-05-26	D614G	3	3	3	3	3
C.17	2020-05-26	Q677H	2	3	3	3	3
AY.100	2020-05-27	T19R	2	4	3	3	3
AY.100	2020-05-27	T95I	2	3	3	3	3
AY.100	2020-05-27	L452R	1	1	2	2	2
AY.100	2020-05-27	T478K	2	4	3	3	4
AY.100	2020-05-27	D614G	3	3	3	3	3
AY.100	2020-05-27	P681R	1	3	3	2	4
B.1.131	2020-05-27	D614G	3	3	3	3	3
B.1.325	2020-05-27	D614G	3	3	3	3	3
AY.25.1	2020-05-28	T19R	2	4	3	3	3
AY.25.1	2020-05-28	L452R	1	1	2	2	2
AY.25.1	2020-05-28	T478K	2	4	3	3	4
AY.25.1	2020-05-28	D614G	3	3	3	3	3
AY.25.1	2020-05-28	P681R	1	3	3	2	4
AY.39	2020-05-28	T19R	2	4	3	3	3
AY.39	2020-05-28	T95I	2	3	3	3	3
AY.39	2020-05-28	L452R	1	1	2	2	2
AY.39	2020-05-28	T478K	2	4	3	3	4
AY.39	2020-05-28	D614G	3	3	3	3	3
AY.39	2020-05-28	P681R	1	3	3	2	4
B.1.1.421	2020-05-28	D614G	3	3	3	3	3
B.1.1.421	2020-05-28	G769V	2	3	3	3	3
B.1.1.421	2020-05-28	V1104I	2	3	3	3	3
B.1.1.77	2020-05-28	D614G	3	3	3	3	3
B.1.393	2020-05-29	D614G	3	3	3	3	3
C.16	2020-05-29	L452R	1	1	2	2	2
C.16	2020-05-29	D614G	3	3	3	3	3
B.1.1.386	2020-05-30	D614G	3	3	3	3	3
BA.1.15	2020-05-30	A67V	3	4	3	3	3
BA.1.15	2020-05-30	T95I	2	3	3	3	3
BA.1.15	2020-05-30	G339D	1	1	4	2	2
BA.1.15	2020-05-30	S371P	1	1	1	1	2
BA.1.15	2020-05-30	S371F	1	1	1	1	2
BA.1.15	2020-05-30	S373P	1	2	2	2	2
BA.1.15	2020-05-30	S375F	1	2	1	1	2
BA.1.15	2020-05-30	K417N	4	4	4	2	3
BA.1.15	2020-05-30	N440K	1	1	2	2	4
BA.1.15	2020-05-30	G446S	4	3	3	3	3
BA.1.15	2020-05-30	S477N	3	2	2	2	3
BA.1.15	2020-05-30	T478K	2	4	3	3	4
BA.1.15	2020-05-30	E484A	3	2	4	2	4
BA.1.15	2020-05-30	Q493R	1	1	1	1	2
BA.1.15	2020-05-30	G496S	1	1	1	2	2
BA.1.15	2020-05-30	Q498R	1	1	1	1	2
BA.1.15	2020-05-30	N501Y	1	1	1	2	4
BA.1.15	2020-05-30	Y505H	1	1	1	2	2
BA.1.15	2020-05-30	T547K	4	3	3	3	3
BA.1.15	2020-05-30	D614G	3	3	3	3	3
BA.1.15	2020-05-30	H655Y	2	3	3	3	3
BA.1.15	2020-05-30	N679K	1	1	2	2	2
BA.1.15	2020-05-30	P681H	1	3	3	2	4
BA.1.15	2020-05-30	N764K	1	2	2	2	2
BA.1.15	2020-05-30	D796Y	3	4	4	2	4
BA.1.15	2020-05-30	N856K	1	1	4	1	2
BA.1.15	2020-05-30	Q954H	1	1	1	2	4
BA.1.15	2020-05-30	N969K	1	1	1	2	1
BA.1.15	2020-05-30	L981F	1	1	4	1	2
B.1.1.268	2020-05-31	D614G	3	3	3	3	3
B.1.1.484	2020-05-31	D614G	3	3	3	3	3
AY.46	2020-06-01	T19R	2	4	3	3	3
AY.46	2020-06-01	L452R	1	1	2	2	2
AY.46	2020-06-01	T478K	2	4	3	3	4
AY.46	2020-06-01	D614G	3	3	3	3	3
AY.46	2020-06-01	P681R	1	3	3	2	4
B.1.1.109	2020-06-01	D614G	3	3	3	3	3
B.1.1.120	2020-06-01	F565L	1	2	4	2	4
B.1.1.120	2020-06-01	D614G	3	3	3	3	3
B.1.1.158	2020-06-01	D614G	3	3	3	3	3
B.1.1.365	2020-06-01	R21I	2	3	3	3	3
B.1.1.365	2020-06-01	D614G	3	3	3	3	3
B.1.1.401	2020-06-01	D614G	3	3	3	3	3
B.1.1.59	2020-06-01	D614G	3	3	3	3	3
B.1.251	2020-06-01	D614G	3	3	3	3	3
B.1.282	2020-06-01	D614G	3	3	3	3	3
B.1.571	2020-06-01	D614G	3	3	3	3	3
B.1.1.12	2020-06-02	D614G	3	3	3	3	3
B.1.1.128	2020-06-02	D614G	3	3	3	3	3
B.1.1.155	2020-06-02	D614G	3	3	3	3	3
B.1.1.251	2020-06-02	D614G	3	3	3	3	3
B.1.1.251	2020-06-02	D111N	1	1	1	1	2
B.1.1.329	2020-06-02	D614G	3	3	3	3	3
B.1.177.57	2020-06-02	A222V	3	4	3	2	3
B.1.177.57	2020-06-02	D614G	3	3	3	3	3
B.1.287	2020-06-02	E180V	3	2	1	2	4
B.1.287	2020-06-02	D614G	3	3	3	3	3
Z.1	2020-06-02	A222V	3	4	3	2	3
Z.1	2020-06-02	D614G	3	3	3	3	3
B.1.1.136	2020-06-03	N501Y	1	1	1	2	4
B.1.1.136	2020-06-03	D614G	3	3	3	3	3
B.1.1.430	2020-06-03	D614G	3	3	3	3	3
B.1.113	2020-06-03	L54F	2	3	3	3	3
B.1.113	2020-06-03	D614G	3	3	3	3	3
B.1.177.4	2020-06-03	A222V	3	4	3	2	3
B.1.177.4	2020-06-03	D614G	3	3	3	3	3
B.1.306	2020-06-03	D614G	3	3	3	3	3
B.1.428.3	2020-06-03	N481K	1	1	1	1	1
B.1.428.3	2020-06-03	D614G	3	3	3	3	3
B.1.437	2020-06-03	D614G	3	3	3	3	3
W.4	2020-06-03	A222V	3	4	3	2	3
W.4	2020-06-03	D614G	3	3	3	3	3
A.19	2020-06-04	D614G	3	3	3	3	3
AE.3	2020-06-04	D614G	3	3	3	3	3
AY.119	2020-06-04	T19R	2	4	3	3	3
AY.119	2020-06-04	T95I	2	3	3	3	3
AY.119	2020-06-04	L452R	1	1	2	2	2
AY.119	2020-06-04	T478K	2	4	3	3	4
AY.119	2020-06-04	D614G	3	3	3	3	3
AY.119	2020-06-04	P681R	1	3	3	2	4
B.1.1.177	2020-06-04	D614G	3	3	3	3	3
B.1.1.265	2020-06-04	D614G	3	3	3	3	3
B.1.1.361	2020-06-04	D614G	3	3	3	3	3
B.1.1.466	2020-06-04	D614G	3	3	3	3	3
B.1.1.53	2020-06-04	D614G	3	3	3	3	3
B.1.36.22	2020-06-04	D614G	3	3	3	3	3
B.1.36.22	2020-06-04	G181V	4	3	3	3	3
B.1.36.24	2020-06-04	D614G	3	3	3	3	3
B.1.401	2020-06-04	D614G	3	3	3	3	3
B.1.304	2020-06-05	D614G	3	3	3	3	3
B.1.349	2020-06-05	D614G	3	3	3	3	3
B.1.357	2020-06-05	D614G	3	3	3	3	3
B.1.1.107	2020-06-06	D614G	3	3	3	3	3
B.1.428.1	2020-06-06	A522V	3	3	3	3	3
B.1.428.1	2020-06-06	D614G	3	3	3	3	3
B.1.1.31	2020-06-07	D614G	3	3	3	3	3
B.1.1.52	2020-06-07	D614G	3	3	3	3	3
B.1.1.92	2020-06-07	D614G	3	3	3	3	3
B.1.502	2020-06-07	D614G	3	3	3	3	3
A.23.1	2020-06-08	F157L	1	2	2	2	3
A.23.1	2020-06-08	Q613H	4	3	3	3	3
A.23.1	2020-06-08	P681R	1	3	3	2	4
B.1.1.180	2020-06-08	D614G	3	3	3	3	3
B.1.1.298	2020-06-08	Y453F	1	1	1	1	1
B.1.1.298	2020-06-08	D614G	3	3	3	3	3
B.1.1.437	2020-06-08	D614G	3	3	3	3	3
B.1.235	2020-06-08	D614G	3	3	3	3	3
B.1.438	2020-06-08	D614G	3	3	3	3	3
B.1.1.15	2020-06-09	D614G	3	3	3	3	3
B.1.1.303	2020-06-09	D614G	3	3	3	3	3
B.1.1.303	2020-06-09	A688V	3	3	3	3	3
B.1.1.362	2020-06-09	D614G	3	3	3	3	3
B.1.1.364	2020-06-09	D614G	3	3	3	3	3
B.1.1.407	2020-06-09	D614G	3	3	3	3	3
B.1.305	2020-06-09	L54F	2	3	3	3	3
B.1.305	2020-06-09	A520S	4	3	3	3	3
B.1.305	2020-06-09	D614G	3	3	3	3	3
B.1.407	2020-06-09	D614G	3	3	3	3	3
B.1.466.1	2020-06-09	N439K	2	3	3	3	4
B.1.466.1	2020-06-09	D614G	3	3	3	3	3
B.1.574	2020-06-09	D614G	3	3	3	3	3
B.1.611	2020-06-09	D614G	3	3	3	3	3
C.2	2020-06-09	D614G	3	3	3	3	3
C.2	2020-06-09	N501T	1	1	1	2	4
B.1.1.322	2020-06-10	D614G	3	3	3	3	3
B.1.1.322	2020-06-10	T732A	4	3	2	3	3
B.1.285	2020-06-10	D614G	3	3	3	3	3
B.1.36.34	2020-06-10	D614G	3	3	3	3	3
B.1.388	2020-06-10	D614G	3	3	3	3	3
B.1.396	2020-06-10	D614G	3	3	3	3	3
B.1.556	2020-06-10	D614G	3	3	3	3	3
AY.4.6	2020-06-11	T19R	2	4	3	3	3
AY.4.6	2020-06-11	T95I	2	3	3	3	3
AY.4.6	2020-06-11	L452R	1	1	2	2	2
AY.4.6	2020-06-11	T478K	2	4	3	3	4
AY.4.6	2020-06-11	D614G	3	3	3	3	3
AY.4.6	2020-06-11	P681R	1	3	3	2	4
B.1.1.300	2020-06-11	D614G	3	3	3	3	3
B.1.203	2020-06-11	D614G	3	3	3	3	3
B.1.203	2020-06-11	N658D	1	1	4	1	2
B.1.610	2020-06-11	L18F	2	3	3	3	3
B.1.610	2020-06-11	D614G	3	3	3	3	3
B.1.1.380	2020-06-12	D614G	3	3	3	3	3
B.1.242	2020-06-12	D614G	3	3	3	3	3
B.1.242	2020-06-12	A1078S	2	3	3	3	3
B.1.36.12	2020-06-12	D614G	3	3	3	3	3
B.1.36.12	2020-06-12	V1068F	4	3	3	3	4
B.1.1.227	2020-06-13	D614G	3	3	3	3	3
B.1.1.157	2020-06-14	D614G	3	3	3	3	3
B.1.595.2	2020-06-14	D614G	3	3	3	3	3
D.3	2020-06-14	D614G	3	3	3	3	3
B.1.140	2020-06-15	D614G	3	3	3	3	3
B.1.614	2020-06-15	D614G	3	3	3	3	3
B.1.614	2020-06-15	D936Y	2	3	3	3	3
B.1.1.225	2020-06-16	D614G	3	3	3	3	3
B.1.1.342	2020-06-16	D614G	3	3	3	3	3
B.1.1.426	2020-06-16	D614G	3	3	3	3	3
B.1.1.93	2020-06-16	D614G	3	3	3	3	3
B.1.233	2020-06-16	D614G	3	3	3	3	3
B.1.294	2020-06-16	D614G	3	3	3	3	3
B.1.294	2020-06-16	L585F	4	2	4	1	1
B.1.1.116	2020-06-17	D614G	3	3	3	3	3
B.1.1.139	2020-06-17	D614G	3	3	3	3	3
B.1.36.19	2020-06-17	D614G	3	3	3	3	3
B.1.1.207	2020-06-18	D614G	3	3	3	3	3
B.1.1.207	2020-06-18	P681H	1	3	3	2	4
B.1.1.389	2020-06-18	D614G	3	3	3	3	3
B.1.1.389	2020-06-18	T1117I	1	3	2	3	3
B.1.1.412	2020-06-18	D614G	3	3	3	3	3
B.1.1.456	2020-06-18	E154Q	1	2	2	3	4
B.1.1.456	2020-06-18	D614G	3	3	3	3	3
B.1.1.456	2020-06-18	I834V	3	3	3	3	4
B.1.1.456	2020-06-18	F490S	4	2	4	2	2
B.1.184	2020-06-18	D614G	3	3	3	3	3
B.1.184	2020-06-18	H1083Q	1	1	1	2	2
B.1.561	2020-06-18	D138Y	2	3	3	3	3
B.1.561	2020-06-18	D614G	3	3	3	3	3
B.1.565	2020-06-18	D614G	3	3	3	3	3
B.1.581	2020-06-18	D614G	3	3	3	3	3
N.7	2020-06-18	D614G	3	3	3	3	3
AY.38	2020-06-19	T19R	2	4	3	3	3
AY.38	2020-06-19	A222V	3	4	3	2	3
AY.38	2020-06-19	T250S	1	2	2	2	3
AY.38	2020-06-19	L452R	1	1	2	2	2
AY.38	2020-06-19	T478K	2	4	3	3	4
AY.38	2020-06-19	D614G	3	3	3	3	3
AY.38	2020-06-19	P681R	1	3	3	2	4
B.1.363	2020-06-19	D614G	3	3	3	3	3
B.1.402	2020-06-19	T307I	2	3	3	3	3
B.1.402	2020-06-19	D614G	3	3	3	3	3
A.18	2020-06-21	D614G	3	3	3	3	3
B.1.1.394	2020-06-21	L176F	4	3	3	3	3
B.1.1.394	2020-06-21	D614G	3	3	3	3	3
B.1.1.239	2020-06-22	D614G	3	3	3	3	3
B.1.1.239	2020-06-22	Q677H	2	3	3	3	3
B.1.1.286	2020-06-22	D614G	3	3	3	3	3
B.1.1.84	2020-06-22	D614G	3	3	3	3	3
B.1.1.84	2020-06-22	A653V	1	2	2	3	3
B.1.318	2020-06-22	D614G	3	3	3	3	3
B.1.385	2020-06-22	D614G	3	3	3	3	3
AE.2	2020-06-23	D614G	3	3	3	3	3
AE.4	2020-06-23	D614G	3	3	3	3	3
B.1.1.417	2020-06-23	D80Y	2	3	3	3	3
B.1.1.417	2020-06-23	D614G	3	3	3	3	3
B.1.1.431	2020-06-23	D614G	3	3	3	3	3
B.1.1.62	2020-06-23	D614G	3	3	3	3	3
B.1.1.63	2020-06-23	S12F	4	2	2	3	3
B.1.1.63	2020-06-23	D614G	3	3	3	3	3
B.1.146	2020-06-23	D614G	3	3	3	3	3
N.2	2020-06-23	D614G	3	3	3	3	3
N.2	2020-06-23	T747I	4	3	3	3	3
N.8	2020-06-23	Q23K	1	1	2	2	2
N.8	2020-06-23	D614G	3	3	3	3	3
N.8	2020-06-23	V1133F	2	3	4	2	4
B.1.1.187	2020-06-24	D614G	3	3	3	3	3
B.1.1.434	2020-06-24	D614G	3	3	3	3	3
B.1.236	2020-06-24	D614G	3	3	3	3	3
B.1.36.35	2020-06-24	L452R	1	1	2	2	2
B.1.36.35	2020-06-24	E583D	4	3	2	3	3
B.1.36.35	2020-06-24	D614G	3	3	3	3	3
B.1.573	2020-06-24	D614G	3	3	3	3	3
B.1.544	2020-06-25	P26L	3	3	3	3	3
B.1.544	2020-06-25	D614G	3	3	3	3	3
B.1.544	2020-06-25	Q675H	2	3	3	3	3
BA.1	2020-06-25	A67V	3	4	3	3	3
BA.1	2020-06-25	T95I	2	3	3	3	3
BA.1	2020-06-25	G339D	1	1	4	2	2
BA.1	2020-06-25	S371P	1	1	1	1	2
BA.1	2020-06-25	S371F	1	1	1	1	2
BA.1	2020-06-25	S373P	1	2	2	2	2
BA.1	2020-06-25	S375F	1	2	1	1	2
BA.1	2020-06-25	K417N	4	4	4	2	3
BA.1	2020-06-25	N440K	1	1	2	2	4
BA.1	2020-06-25	G446S	4	3	3	3	3
BA.1	2020-06-25	S477N	3	2	2	2	3
BA.1	2020-06-25	T478K	2	4	3	3	4
BA.1	2020-06-25	E484A	3	2	4	2	4
BA.1	2020-06-25	Q493R	1	1	1	1	2
BA.1	2020-06-25	G496S	1	1	1	2	2
BA.1	2020-06-25	Q498R	1	1	1	1	2
BA.1	2020-06-25	N501Y	1	1	1	2	4
BA.1	2020-06-25	Y505H	1	1	1	2	2
BA.1	2020-06-25	T547K	4	3	3	3	3
BA.1	2020-06-25	D614G	3	3	3	3	3
BA.1	2020-06-25	H655Y	2	3	3	3	3
BA.1	2020-06-25	N679K	1	1	2	2	2
BA.1	2020-06-25	P681H	1	3	3	2	4
BA.1	2020-06-25	N764K	1	2	2	2	2
BA.1	2020-06-25	D796Y	3	4	4	2	4
BA.1	2020-06-25	N856K	1	1	4	1	2
BA.1	2020-06-25	Q954H	1	1	1	2	4
BA.1	2020-06-25	N969K	1	1	1	2	1
BA.1	2020-06-25	L981F	1	1	4	1	2
C.29	2020-06-25	D614G	3	3	3	3	3
B.1.1.396	2020-06-26	M153T	4	3	3	3	3
B.1.1.396	2020-06-26	D614G	3	3	3	3	3
B.1.1.441	2020-06-26	D614G	3	3	3	3	3
B.1.346	2020-06-27	D614G	3	3	3	3	3
B.1.36.29	2020-06-27	N440K	1	1	2	2	4
B.1.36.29	2020-06-27	D614G	3	3	3	3	3
B.1.595.3	2020-06-27	D614G	3	3	3	3	3
B.1.595.3	2020-06-27	T638A	1	1	4	1	4
AE.5	2020-06-28	D614G	3	3	3	3	3
L.4	2020-06-29	D614G	3	3	3	3	3
L.4	2020-06-29	V1104L	2	3	3	3	3
B.1.36.38	2020-06-30	D614G	3	3	3	3	3
B.1.1.332	2020-07-01	D614G	3	3	3	3	3
B.1.1.332	2020-07-01	V1176F	1	2	2	3	3
B.1.1.357	2020-07-01	D614G	3	3	3	3	3
B.1.1.39	2020-07-01	D614G	3	3	3	3	3
B.1.1.47	2020-07-01	D614G	3	3	3	3	3
B.1.423	2020-07-01	D614G	3	3	3	3	3
B.1.541	2020-07-01	D614G	3	3	3	3	3
B.1.541	2020-07-01	A67S	3	4	3	3	3
BA.2.9.3	2020-07-01	T19I	2	4	3	3	3
BA.2.9.3	2020-07-01	W64R	1	1	4	2	4
BA.2.9.3	2020-07-01	V213G	3	4	3	3	3
BA.2.9.3	2020-07-01	G339D	1	1	4	2	2
BA.2.9.3	2020-07-01	S371F	1	1	1	1	2
BA.2.9.3	2020-07-01	S373P	1	2	2	2	2
BA.2.9.3	2020-07-01	S375F	1	2	1	1	2
BA.2.9.3	2020-07-01	T376A	1	1	1	2	2
BA.2.9.3	2020-07-01	D405N	1	1	1	1	2
BA.2.9.3	2020-07-01	R408S	2	4	3	3	3
BA.2.9.3	2020-07-01	K417N	4	4	4	2	3
BA.2.9.3	2020-07-01	N440K	1	1	2	2	4
BA.2.9.3	2020-07-01	S477N	3	2	2	2	3
BA.2.9.3	2020-07-01	T478K	2	4	3	3	4
BA.2.9.3	2020-07-01	E484A	3	2	4	2	4
BA.2.9.3	2020-07-01	Q493R	1	1	1	1	2
BA.2.9.3	2020-07-01	Q498R	1	1	1	1	2
BA.2.9.3	2020-07-01	N501Y	1	1	1	2	4
BA.2.9.3	2020-07-01	Y505H	1	1	1	2	2
BA.2.9.3	2020-07-01	D614G	3	3	3	3	3
BA.2.9.3	2020-07-01	H655Y	2	3	3	3	3
BA.2.9.3	2020-07-01	N679K	1	1	2	2	2
BA.2.9.3	2020-07-01	P681H	1	3	3	2	4
BA.2.9.3	2020-07-01	N764K	1	2	2	2	2
BA.2.9.3	2020-07-01	D796Y	3	4	4	2	4
BA.2.9.3	2020-07-01	Q954H	1	1	1	2	4
BA.2.9.3	2020-07-01	N969K	1	1	1	2	1
BA.5.2	2020-07-01	T19I	2	4	3	3	3
BA.5.2	2020-07-01	V213G	3	4	3	3	3
BA.5.2	2020-07-01	G339D	1	1	4	2	2
BA.5.2	2020-07-01	S371F	1	1	1	1	2
BA.5.2	2020-07-01	S373P	1	2	2	2	2
BA.5.2	2020-07-01	S375F	1	2	1	1	2
BA.5.2	2020-07-01	T376A	1	1	1	2	2
BA.5.2	2020-07-01	D405N	1	1	1	1	2
BA.5.2	2020-07-01	R408S	2	4	3	3	3
BA.5.2	2020-07-01	K417N	4	4	4	2	3
BA.5.2	2020-07-01	N440K	1	1	2	2	4
BA.5.2	2020-07-01	L452R	1	1	2	2	2
BA.5.2	2020-07-01	S477N	3	2	2	2	3
BA.5.2	2020-07-01	T478K	2	4	3	3	4
BA.5.2	2020-07-01	E484A	3	2	4	2	4
BA.5.2	2020-07-01	F486V	1	1	1	1	2
BA.5.2	2020-07-01	Q498R	1	1	1	1	2
BA.5.2	2020-07-01	N501Y	1	1	1	2	4
BA.5.2	2020-07-01	Y505H	1	1	1	2	2
BA.5.2	2020-07-01	D614G	3	3	3	3	3
BA.5.2	2020-07-01	H655Y	2	3	3	3	3
BA.5.2	2020-07-01	N679K	1	1	2	2	2
BA.5.2	2020-07-01	P681H	1	3	3	2	4
BA.5.2	2020-07-01	N764K	1	2	2	2	2
BA.5.2	2020-07-01	D796Y	3	4	4	2	4
BA.5.2	2020-07-01	Q954H	1	1	1	2	4
BA.5.2	2020-07-01	N969K	1	1	1	2	1
BA.5.3.1	2020-07-01	T19I	2	4	3	3	3
BA.5.3.1	2020-07-01	V213G	3	4	3	3	3
BA.5.3.1	2020-07-01	G339D	1	1	4	2	2
BA.5.3.1	2020-07-01	S371F	1	1	1	1	2
BA.5.3.1	2020-07-01	S373P	1	2	2	2	2
BA.5.3.1	2020-07-01	S375F	1	2	1	1	2
BA.5.3.1	2020-07-01	T376A	1	1	1	2	2
BA.5.3.1	2020-07-01	D405N	1	1	1	1	2
BA.5.3.1	2020-07-01	R408S	2	4	3	3	3
BA.5.3.1	2020-07-01	K417N	4	4	4	2	3
BA.5.3.1	2020-07-01	N440K	1	1	2	2	4
BA.5.3.1	2020-07-01	L452R	1	1	2	2	2
BA.5.3.1	2020-07-01	S477N	3	2	2	2	3
BA.5.3.1	2020-07-01	T478K	2	4	3	3	4
BA.5.3.1	2020-07-01	E484A	3	2	4	2	4
BA.5.3.1	2020-07-01	F486V	1	1	1	1	2
BA.5.3.1	2020-07-01	Q498R	1	1	1	1	2
BA.5.3.1	2020-07-01	N501Y	1	1	1	2	4
BA.5.3.1	2020-07-01	Y505H	1	1	1	2	2
BA.5.3.1	2020-07-01	D614G	3	3	3	3	3
BA.5.3.1	2020-07-01	H655Y	2	3	3	3	3
BA.5.3.1	2020-07-01	N679K	1	1	2	2	2
BA.5.3.1	2020-07-01	P681H	1	3	3	2	4
BA.5.3.1	2020-07-01	N764K	1	2	2	2	2
BA.5.3.1	2020-07-01	D796Y	3	4	4	2	4
BA.5.3.1	2020-07-01	Q954H	1	1	1	2	4
BA.5.3.1	2020-07-01	N969K	1	1	1	2	1
BE.1	2020-07-01	T19I	2	4	3	3	3
BE.1	2020-07-01	V213G	3	4	3	3	3
BE.1	2020-07-01	G339D	1	1	4	2	2
BE.1	2020-07-01	S371F	1	1	1	1	2
BE.1	2020-07-01	S373P	1	2	2	2	2
BE.1	2020-07-01	S375F	1	2	1	1	2
BE.1	2020-07-01	T376A	1	1	1	2	2
BE.1	2020-07-01	D405N	1	1	1	1	2
BE.1	2020-07-01	R408S	2	4	3	3	3
BE.1	2020-07-01	K417N	4	4	4	2	3
BE.1	2020-07-01	N440K	1	1	2	2	4
BE.1	2020-07-01	L452R	1	1	2	2	2
BE.1	2020-07-01	S477N	3	2	2	2	3
BE.1	2020-07-01	T478K	2	4	3	3	4
BE.1	2020-07-01	E484A	3	2	4	2	4
BE.1	2020-07-01	F486V	1	1	1	1	2
BE.1	2020-07-01	Q498R	1	1	1	1	2
BE.1	2020-07-01	N501Y	1	1	1	2	4
BE.1	2020-07-01	Y505H	1	1	1	2	2
BE.1	2020-07-01	D614G	3	3	3	3	3
BE.1	2020-07-01	H655Y	2	3	3	3	3
BE.1	2020-07-01	N679K	1	1	2	2	2
BE.1	2020-07-01	P681H	1	3	3	2	4
BE.1	2020-07-01	N764K	1	2	2	2	2
BE.1	2020-07-01	D796Y	3	4	4	2	4
BE.1	2020-07-01	Q954H	1	1	1	2	4
BE.1	2020-07-01	N969K	1	1	1	2	1
C.18	2020-07-01	D614G	3	3	3	3	3
C.9	2020-07-01	D614G	3	3	3	3	3
P.7	2020-07-01	D614G	3	3	3	3	3
P.7	2020-07-01	V1176F	1	2	2	3	3
B.1.1.518	2020-07-02	D614G	3	3	3	3	3
BA.4	2020-07-02	T19I	2	4	3	3	3
BA.4	2020-07-02	V213G	3	4	3	3	3
BA.4	2020-07-02	G339D	1	1	4	2	2
BA.4	2020-07-02	S371F	1	1	1	1	2
BA.4	2020-07-02	S373P	1	2	2	2	2
BA.4	2020-07-02	S375F	1	2	1	1	2
BA.4	2020-07-02	T376A	1	1	1	2	2
BA.4	2020-07-02	D405N	1	1	1	1	2
BA.4	2020-07-02	R408S	2	4	3	3	3
BA.4	2020-07-02	K417N	4	4	4	2	3
BA.4	2020-07-02	N440K	1	1	2	2	4
BA.4	2020-07-02	L452R	1	1	2	2	2
BA.4	2020-07-02	S477N	3	2	2	2	3
BA.4	2020-07-02	T478K	2	4	3	3	4
BA.4	2020-07-02	E484A	3	2	4	2	4
BA.4	2020-07-02	F486V	1	1	1	1	2
BA.4	2020-07-02	Q498R	1	1	1	1	2
BA.4	2020-07-02	N501Y	1	1	1	2	4
BA.4	2020-07-02	Y505H	1	1	1	2	2
BA.4	2020-07-02	D614G	3	3	3	3	3
BA.4	2020-07-02	H655Y	2	3	3	3	3
BA.4	2020-07-02	N658S	1	1	4	1	2
BA.4	2020-07-02	N679K	1	1	2	2	2
BA.4	2020-07-02	P681H	1	3	3	2	4
BA.4	2020-07-02	N764K	1	2	2	2	2
BA.4	2020-07-02	D796Y	3	4	4	2	4
BA.4	2020-07-02	Q954H	1	1	1	2	4
BA.4	2020-07-02	N969K	1	1	1	2	1
B.1.258.2	2020-07-03	N439K	2	3	3	3	4
B.1.258.2	2020-07-03	D614G	3	3	3	3	3
B.1.337	2020-07-03	D614G	3	3	3	3	3
B.1.480	2020-07-03	N439K	2	3	3	3	4
B.1.480	2020-07-03	D614G	3	3	3	3	3
B.1.480	2020-07-03	M1229I	1	2	2	2	2
B.1.532	2020-07-04	D614G	3	3	3	3	3
BA.5	2020-07-04	T19I	2	4	3	3	3
BA.5	2020-07-04	V213G	3	4	3	3	3
BA.5	2020-07-04	G339D	1	1	4	2	2
BA.5	2020-07-04	S371F	1	1	1	1	2
BA.5	2020-07-04	S373P	1	2	2	2	2
BA.5	2020-07-04	S375F	1	2	1	1	2
BA.5	2020-07-04	T376A	1	1	1	2	2
BA.5	2020-07-04	D405N	1	1	1	1	2
BA.5	2020-07-04	R408S	2	4	3	3	3
BA.5	2020-07-04	K417N	4	4	4	2	3
BA.5	2020-07-04	N440K	1	1	2	2	4
BA.5	2020-07-04	L452R	1	1	2	2	2
BA.5	2020-07-04	S477N	3	2	2	2	3
BA.5	2020-07-04	T478K	2	4	3	3	4
BA.5	2020-07-04	E484A	3	2	4	2	4
BA.5	2020-07-04	F486V	1	1	1	1	2
BA.5	2020-07-04	Q498R	1	1	1	1	2
BA.5	2020-07-04	N501Y	1	1	1	2	4
BA.5	2020-07-04	Y505H	1	1	1	2	2
BA.5	2020-07-04	D614G	3	3	3	3	3
BA.5	2020-07-04	H655Y	2	3	3	3	3
BA.5	2020-07-04	N679K	1	1	2	2	2
BA.5	2020-07-04	P681H	1	3	3	2	4
BA.5	2020-07-04	N764K	1	2	2	2	2
BA.5	2020-07-04	D796Y	3	4	4	2	4
BA.5	2020-07-04	Q954H	1	1	1	2	4
BA.5	2020-07-04	N969K	1	1	1	2	1
B.1.1.302	2020-07-06	D614G	3	3	3	3	3
B.1.1.302	2020-07-06	V1122L	2	3	3	3	3
B.1.1.359	2020-07-06	D614G	3	3	3	3	3
B.1.258.3	2020-07-06	P25S	4	2	2	3	3
B.1.258.3	2020-07-06	N439K	2	3	3	3	4
B.1.258.3	2020-07-06	D614G	3	3	3	3	3
B.1.258.3	2020-07-06	C1253F	1	3	2	3	4
B.1.404	2020-07-06	S477N	3	2	2	2	3
B.1.404	2020-07-06	D614G	3	3	3	3	3
B.1.406	2020-07-06	D614G	3	3	3	3	3
B.1.406	2020-07-06	D1163Y	3	3	3	3	3
BA.5.2.1	2020-07-06	T19I	2	4	3	3	3
BA.5.2.1	2020-07-06	V213G	3	4	3	3	3
BA.5.2.1	2020-07-06	G339D	1	1	4	2	2
BA.5.2.1	2020-07-06	S371F	1	1	1	1	2
BA.5.2.1	2020-07-06	S373P	1	2	2	2	2
BA.5.2.1	2020-07-06	S375F	1	2	1	1	2
BA.5.2.1	2020-07-06	T376A	1	1	1	2	2
BA.5.2.1	2020-07-06	D405N	1	1	1	1	2
BA.5.2.1	2020-07-06	R408S	2	4	3	3	3
BA.5.2.1	2020-07-06	K417N	4	4	4	2	3
BA.5.2.1	2020-07-06	N440K	1	1	2	2	4
BA.5.2.1	2020-07-06	L452R	1	1	2	2	2
BA.5.2.1	2020-07-06	S477N	3	2	2	2	3
BA.5.2.1	2020-07-06	T478K	2	4	3	3	4
BA.5.2.1	2020-07-06	E484A	3	2	4	2	4
BA.5.2.1	2020-07-06	F486V	1	1	1	1	2
BA.5.2.1	2020-07-06	Q498R	1	1	1	1	2
BA.5.2.1	2020-07-06	N501Y	1	1	1	2	4
BA.5.2.1	2020-07-06	Y505H	1	1	1	2	2
BA.5.2.1	2020-07-06	D614G	3	3	3	3	3
BA.5.2.1	2020-07-06	H655Y	2	3	3	3	3
BA.5.2.1	2020-07-06	N679K	1	1	2	2	2
BA.5.2.1	2020-07-06	P681H	1	3	3	2	4
BA.5.2.1	2020-07-06	N764K	1	2	2	2	2
BA.5.2.1	2020-07-06	D796Y	3	4	4	2	4
BA.5.2.1	2020-07-06	Q954H	1	1	1	2	4
BA.5.2.1	2020-07-06	N969K	1	1	1	2	1
AN.1	2020-07-07	D614G	3	3	3	3	3
B.1.177.6	2020-07-07	L18F	2	3	3	3	3
B.1.177.6	2020-07-07	Q23H	1	1	2	2	2
B.1.177.6	2020-07-07	A222V	3	4	3	2	3
B.1.177.6	2020-07-07	D614G	3	3	3	3	3
B.1.36.7	2020-07-07	D614G	3	3	3	3	3
B.1.602	2020-07-07	D614G	3	3	3	3	3
L.3	2020-07-07	L452R	1	1	2	2	2
L.3	2020-07-07	D614G	3	3	3	3	3
L.3	2020-07-07	Y1155F	1	1	1	2	1
L.3	2020-07-07	V1228L	3	3	3	3	3
B.1.1.305	2020-07-08	D614G	3	3	3	3	3
B.1.436	2020-07-08	D614G	3	3	3	3	3
B.1.623	2020-07-08	S494P	2	3	3	3	3
B.1.623	2020-07-08	N501Y	1	1	1	2	4
B.1.623	2020-07-08	D614G	3	3	3	3	3
B.1.623	2020-07-08	P681H	1	3	3	2	4
B.1.623	2020-07-08	E1111K	1	1	2	2	2
B.1.623	2020-07-08	K854N	1	4	3	3	3
Q.3	2020-07-08	D178H	1	2	2	2	4
Q.3	2020-07-08	N501Y	1	1	1	2	4
Q.3	2020-07-08	A570D	4	2	2	2	2
Q.3	2020-07-08	D614G	3	3	3	3	3
Q.3	2020-07-08	P681H	1	3	3	2	4
Q.3	2020-07-08	T716I	2	4	3	3	3
Q.3	2020-07-08	S982A	1	1	2	2	4
Q.3	2020-07-08	D1118H	1	2	2	2	2
XB	2020-07-08	L18R	2	3	3	3	3
XB	2020-07-08	T95I	2	3	3	3	3
XB	2020-07-08	R158S	4	3	2	3	4
XB	2020-07-08	N440K	1	1	2	2	4
XB	2020-07-08	D614G	3	3	3	3	3
XB	2020-07-08	P681H	1	3	3	2	4
XB	2020-07-08	A688V	3	3	3	3	3
XB	2020-07-08	S735A	4	2	4	2	4
XB	2020-07-08	T1027I	2	4	3	3	4
AE.7	2020-07-09	D614G	3	3	3	3	3
A.24	2020-07-10	D614A	3	3	3	3	3
B.1.1.408	2020-07-11	D614G	3	3	3	3	3
B.1.367	2020-07-13	D80Y	2	3	3	3	3
B.1.367	2020-07-13	D614G	3	3	3	3	3
B.1.488	2020-07-13	D614G	3	3	3	3	3
B.1.488	2020-07-13	D936Y	2	3	3	3	3
B.1.488	2020-07-13	R847T	4	3	3	3	4
B.1.1.347	2020-07-14	D614G	3	3	3	3	3
B.1.1.414	2020-07-14	D614G	3	3	3	3	3
C.36.3	2020-07-14	S12F	4	2	2	3	3
C.36.3	2020-07-14	W152R	1	4	2	3	3
C.36.3	2020-07-14	R346S	1	1	4	2	4
C.36.3	2020-07-14	L452R	1	1	2	2	2
C.36.3	2020-07-14	D614G	3	3	3	3	3
C.36.3	2020-07-14	Q677H	2	3	3	3	3
C.36.3	2020-07-14	A899S	1	1	1	1	2
B.1.1.297	2020-07-16	D614G	3	3	3	3	3
B.1.1.325	2020-07-16	D614G	3	3	3	3	3
B.1.36.17	2020-07-16	D614G	3	3	3	3	3
AY.75	2020-07-17	T19R	2	4	3	3	3
AY.75	2020-07-17	A222V	3	4	3	2	3
AY.75	2020-07-17	L452R	1	1	2	2	2
AY.75	2020-07-17	T478K	2	4	3	3	4
AY.75	2020-07-17	D614G	3	3	3	3	3
AY.75	2020-07-17	P681R	1	3	3	2	4
B.1.188	2020-07-17	D614G	3	3	3	3	3
B.1.530	2020-07-17	D614G	3	3	3	3	3
B.1.530	2020-07-17	P681H	1	3	3	2	4
B.1.549	2020-07-17	D614G	3	3	3	3	3
B.1.1.170	2020-07-19	D614G	3	3	3	3	3
B.1.1.234	2020-07-20	M153I	4	3	3	3	3
B.1.1.234	2020-07-20	D614G	3	3	3	3	3
B.1.1.234	2020-07-20	S691A	1	2	2	2	3
B.1.1.288	2020-07-20	D614G	3	3	3	3	3
B.1.218	2020-07-20	D614G	3	3	3	3	3
B.1.580	2020-07-20	D614G	3	3	3	3	3
BA.4.4	2020-07-20	T19I	2	4	3	3	3
BA.4.4	2020-07-20	V213G	3	4	3	3	3
BA.4.4	2020-07-20	G339D	1	1	4	2	2
BA.4.4	2020-07-20	S371F	1	1	1	1	2
BA.4.4	2020-07-20	S373P	1	2	2	2	2
BA.4.4	2020-07-20	S375F	1	2	1	1	2
BA.4.4	2020-07-20	T376A	1	1	1	2	2
BA.4.4	2020-07-20	D405N	1	1	1	1	2
BA.4.4	2020-07-20	R408S	2	4	3	3	3
BA.4.4	2020-07-20	K417N	4	4	4	2	3
BA.4.4	2020-07-20	N440K	1	1	2	2	4
BA.4.4	2020-07-20	L452R	1	1	2	2	2
BA.4.4	2020-07-20	S477N	3	2	2	2	3
BA.4.4	2020-07-20	T478K	2	4	3	3	4
BA.4.4	2020-07-20	E484A	3	2	4	2	4
BA.4.4	2020-07-20	F486V	1	1	1	1	2
BA.4.4	2020-07-20	Q498R	1	1	1	1	2
BA.4.4	2020-07-20	N501Y	1	1	1	2	4
BA.4.4	2020-07-20	Y505H	1	1	1	2	2
BA.4.4	2020-07-20	D614G	3	3	3	3	3
BA.4.4	2020-07-20	H655Y	2	3	3	3	3
BA.4.4	2020-07-20	N658S	1	1	4	1	2
BA.4.4	2020-07-20	N679K	1	1	2	2	2
BA.4.4	2020-07-20	P681H	1	3	3	2	4
BA.4.4	2020-07-20	N764K	1	2	2	2	2
BA.4.4	2020-07-20	D796Y	3	4	4	2	4
BA.4.4	2020-07-20	Q954H	1	1	1	2	4
BA.4.4	2020-07-20	N969K	1	1	1	2	1
BA.4.6	2020-07-20	T19I	2	4	3	3	3
BA.4.6	2020-07-20	V213G	3	4	3	3	3
BA.4.6	2020-07-20	G339D	1	1	4	2	2
BA.4.6	2020-07-20	R346T	1	1	4	2	4
BA.4.6	2020-07-20	S371F	1	1	1	1	2
BA.4.6	2020-07-20	S373P	1	2	2	2	2
BA.4.6	2020-07-20	S375F	1	2	1	1	2
BA.4.6	2020-07-20	T376A	1	1	1	2	2
BA.4.6	2020-07-20	D405N	1	1	1	1	2
BA.4.6	2020-07-20	R408S	2	4	3	3	3
BA.4.6	2020-07-20	K417N	4	4	4	2	3
BA.4.6	2020-07-20	N440K	1	1	2	2	4
BA.4.6	2020-07-20	L452R	1	1	2	2	2
BA.4.6	2020-07-20	S477N	3	2	2	2	3
BA.4.6	2020-07-20	T478K	2	4	3	3	4
BA.4.6	2020-07-20	E484A	3	2	4	2	4
BA.4.6	2020-07-20	F486V	1	1	1	1	2
BA.4.6	2020-07-20	Q498R	1	1	1	1	2
BA.4.6	2020-07-20	N501Y	1	1	1	2	4
BA.4.6	2020-07-20	Y505H	1	1	1	2	2
BA.4.6	2020-07-20	D614G	3	3	3	3	3
BA.4.6	2020-07-20	H655Y	2	3	3	3	3
BA.4.6	2020-07-20	N658S	1	1	4	1	2
BA.4.6	2020-07-20	N679K	1	1	2	2	2
BA.4.6	2020-07-20	P681H	1	3	3	2	4
BA.4.6	2020-07-20	N764K	1	2	2	2	2
BA.4.6	2020-07-20	D796Y	3	4	4	2	4
BA.4.6	2020-07-20	Q954H	1	1	1	2	4
BA.4.6	2020-07-20	N969K	1	1	1	2	1
BA.5.2.20	2020-07-20	T19I	2	4	3	3	3
BA.5.2.20	2020-07-20	V213G	3	4	3	3	3
BA.5.2.20	2020-07-20	G339D	1	1	4	2	2
BA.5.2.20	2020-07-20	S371F	1	1	1	1	2
BA.5.2.20	2020-07-20	S373P	1	2	2	2	2
BA.5.2.20	2020-07-20	S375F	1	2	1	1	2
BA.5.2.20	2020-07-20	T376A	1	1	1	2	2
BA.5.2.20	2020-07-20	D405N	1	1	1	1	2
BA.5.2.20	2020-07-20	R408S	2	4	3	3	3
BA.5.2.20	2020-07-20	K417N	4	4	4	2	3
BA.5.2.20	2020-07-20	N440K	1	1	2	2	4
BA.5.2.20	2020-07-20	L452R	1	1	2	2	2
BA.5.2.20	2020-07-20	S477N	3	2	2	2	3
BA.5.2.20	2020-07-20	T478K	2	4	3	3	4
BA.5.2.20	2020-07-20	E484A	3	2	4	2	4
BA.5.2.20	2020-07-20	F486V	1	1	1	1	2
BA.5.2.20	2020-07-20	Q498R	1	1	1	1	2
BA.5.2.20	2020-07-20	N501Y	1	1	1	2	4
BA.5.2.20	2020-07-20	Y505H	1	1	1	2	2
BA.5.2.20	2020-07-20	D614G	3	3	3	3	3
BA.5.2.20	2020-07-20	H655Y	2	3	3	3	3
BA.5.2.20	2020-07-20	N679K	1	1	2	2	2
BA.5.2.20	2020-07-20	P681H	1	3	3	2	4
BA.5.2.20	2020-07-20	N764K	1	2	2	2	2
BA.5.2.20	2020-07-20	D796Y	3	4	4	2	4
BA.5.2.20	2020-07-20	Q954H	1	1	1	2	4
BA.5.2.20	2020-07-20	N969K	1	1	1	2	1
AD.2	2020-07-21	D614G	3	3	3	3	3
B.1.1.242	2020-07-21	D614G	3	3	3	3	3
B.1.1.512	2020-07-21	D614G	3	3	3	3	3
B.1.1.512	2020-07-21	A1078S	2	3	3	3	3
B.1.1.512	2020-07-21	I1232F	1	2	1	1	1
B.1.1.512	2020-07-21	Q677H	2	3	3	3	3
BA.2.9	2020-07-21	T19I	2	4	3	3	3
BA.2.9	2020-07-21	V213G	3	4	3	3	3
BA.2.9	2020-07-21	G339D	1	1	4	2	2
BA.2.9	2020-07-21	S371F	1	1	1	1	2
BA.2.9	2020-07-21	S373P	1	2	2	2	2
BA.2.9	2020-07-21	S375F	1	2	1	1	2
BA.2.9	2020-07-21	T376A	1	1	1	2	2
BA.2.9	2020-07-21	D405N	1	1	1	1	2
BA.2.9	2020-07-21	R408S	2	4	3	3	3
BA.2.9	2020-07-21	K417N	4	4	4	2	3
BA.2.9	2020-07-21	N440K	1	1	2	2	4
BA.2.9	2020-07-21	S477N	3	2	2	2	3
BA.2.9	2020-07-21	T478K	2	4	3	3	4
BA.2.9	2020-07-21	E484A	3	2	4	2	4
BA.2.9	2020-07-21	Q493R	1	1	1	1	2
BA.2.9	2020-07-21	Q498R	1	1	1	1	2
BA.2.9	2020-07-21	N501Y	1	1	1	2	4
BA.2.9	2020-07-21	Y505H	1	1	1	2	2
BA.2.9	2020-07-21	D614G	3	3	3	3	3
BA.2.9	2020-07-21	H655Y	2	3	3	3	3
BA.2.9	2020-07-21	N679K	1	1	2	2	2
BA.2.9	2020-07-21	P681H	1	3	3	2	4
BA.2.9	2020-07-21	N764K	1	2	2	2	2
BA.2.9	2020-07-21	D796Y	3	4	4	2	4
BA.2.9	2020-07-21	Q954H	1	1	1	2	4
BA.2.9	2020-07-21	N969K	1	1	1	2	1
BF.5	2020-07-21	T19I	2	4	3	3	3
BF.5	2020-07-21	V213G	3	4	3	3	3
BF.5	2020-07-21	G339D	1	1	4	2	2
BF.5	2020-07-21	S371F	1	1	1	1	2
BF.5	2020-07-21	S373P	1	2	2	2	2
BF.5	2020-07-21	S375F	1	2	1	1	2
BF.5	2020-07-21	T376A	1	1	1	2	2
BF.5	2020-07-21	D405N	1	1	1	1	2
BF.5	2020-07-21	R408S	2	4	3	3	3
BF.5	2020-07-21	K417N	4	4	4	2	3
BF.5	2020-07-21	N440K	1	1	2	2	4
BF.5	2020-07-21	L452R	1	1	2	2	2
BF.5	2020-07-21	S477N	3	2	2	2	3
BF.5	2020-07-21	T478K	2	4	3	3	4
BF.5	2020-07-21	E484A	3	2	4	2	4
BF.5	2020-07-21	F486V	1	1	1	1	2
BF.5	2020-07-21	Q498R	1	1	1	1	2
BF.5	2020-07-21	N501Y	1	1	1	2	4
BF.5	2020-07-21	Y505H	1	1	1	2	2
BF.5	2020-07-21	D614G	3	3	3	3	3
BF.5	2020-07-21	H655Y	2	3	3	3	3
BF.5	2020-07-21	N679K	1	1	2	2	2
BF.5	2020-07-21	P681H	1	3	3	2	4
BF.5	2020-07-21	N764K	1	2	2	2	2
BF.5	2020-07-21	D796Y	3	4	4	2	4
BF.5	2020-07-21	Q954H	1	1	1	2	4
BF.5	2020-07-21	N969K	1	1	1	2	1
BF.5	2020-07-21	A1020S	2	3	3	3	3
C.37	2020-07-21	G75V	1	3	3	3	3
C.37	2020-07-21	T76I	4	2	3	3	3
C.37	2020-07-21	L452Q	1	1	2	2	2
C.37	2020-07-21	F490S	4	2	4	2	2
C.37	2020-07-21	D614G	3	3	3	3	3
C.37	2020-07-21	T859N	2	3	3	3	3
B.1.1.141	2020-07-22	M153T	4	3	3	3	3
B.1.1.141	2020-07-22	D614G	3	3	3	3	3
BA.5.2.33	2020-07-22	T19I	2	4	3	3	3
BA.5.2.33	2020-07-22	V213G	3	4	3	3	3
BA.5.2.33	2020-07-22	G339D	1	1	4	2	2
BA.5.2.33	2020-07-22	S371F	1	1	1	1	2
BA.5.2.33	2020-07-22	S373P	1	2	2	2	2
BA.5.2.33	2020-07-22	S375F	1	2	1	1	2
BA.5.2.33	2020-07-22	T376A	1	1	1	2	2
BA.5.2.33	2020-07-22	D405N	1	1	1	1	2
BA.5.2.33	2020-07-22	R408S	2	4	3	3	3
BA.5.2.33	2020-07-22	K417N	4	4	4	2	3
BA.5.2.33	2020-07-22	N440K	1	1	2	2	4
BA.5.2.33	2020-07-22	L452R	1	1	2	2	2
BA.5.2.33	2020-07-22	S477N	3	2	2	2	3
BA.5.2.33	2020-07-22	T478K	2	4	3	3	4
BA.5.2.33	2020-07-22	E484A	3	2	4	2	4
BA.5.2.33	2020-07-22	F486V	1	1	1	1	2
BA.5.2.33	2020-07-22	Q498R	1	1	1	1	2
BA.5.2.33	2020-07-22	N501Y	1	1	1	2	4
BA.5.2.33	2020-07-22	Y505H	1	1	1	2	2
BA.5.2.33	2020-07-22	D614G	3	3	3	3	3
BA.5.2.33	2020-07-22	H655Y	2	3	3	3	3
BA.5.2.33	2020-07-22	N679K	1	1	2	2	2
BA.5.2.33	2020-07-22	P681H	1	3	3	2	4
BA.5.2.33	2020-07-22	N764K	1	2	2	2	2
BA.5.2.33	2020-07-22	D796Y	3	4	4	2	4
BA.5.2.33	2020-07-22	Q954H	1	1	1	2	4
BA.5.2.33	2020-07-22	N969K	1	1	1	2	1
BF.28	2020-07-22	T19I	2	4	3	3	3
BF.28	2020-07-22	V213G	3	4	3	3	3
BF.28	2020-07-22	G339D	1	1	4	2	2
BF.28	2020-07-22	S371F	1	1	1	1	2
BF.28	2020-07-22	S373P	1	2	2	2	2
BF.28	2020-07-22	S375F	1	2	1	1	2
BF.28	2020-07-22	T376A	1	1	1	2	2
BF.28	2020-07-22	D405N	1	1	1	1	2
BF.28	2020-07-22	R408S	2	4	3	3	3
BF.28	2020-07-22	K417N	4	4	4	2	3
BF.28	2020-07-22	N440K	1	1	2	2	4
BF.28	2020-07-22	L452R	1	1	2	2	2
BF.28	2020-07-22	S477N	3	2	2	2	3
BF.28	2020-07-22	T478K	2	4	3	3	4
BF.28	2020-07-22	E484A	3	2	4	2	4
BF.28	2020-07-22	F486V	1	1	1	1	2
BF.28	2020-07-22	Q498R	1	1	1	1	2
BF.28	2020-07-22	N501Y	1	1	1	2	4
BF.28	2020-07-22	Y505H	1	1	1	2	2
BF.28	2020-07-22	D614G	3	3	3	3	3
BF.28	2020-07-22	H655Y	2	3	3	3	3
BF.28	2020-07-22	N679K	1	1	2	2	2
BF.28	2020-07-22	P681H	1	3	3	2	4
BF.28	2020-07-22	N764K	1	2	2	2	2
BF.28	2020-07-22	D796Y	3	4	4	2	4
BF.28	2020-07-22	Q954H	1	1	1	2	4
BF.28	2020-07-22	N969K	1	1	1	2	1
BA.5.1.25	2020-07-23	T19I	2	4	3	3	3
[truncated: 35,028 more rows]

## Sheet: Supplementary Information 5
ERX ID	ERR ID	Artic primer version	Collection date	Instrument model	Library strategy	Library selection
ERX4365473	ERR4424915	3	20200301	Illumina NovaSeq 6000	AMPLICON	PCR
ERX4363947	ERR4423389	3	20200302	Illumina NovaSeq 6000	AMPLICON	PCR
ERX4363959	ERR4423401	3	20200302	Illumina NovaSeq 6000	AMPLICON	PCR
ERX4364558	ERR4424000	3	20200302	Illumina NovaSeq 6000	AMPLICON	PCR
ERX4398888	ERR4458517	3	20200302	Illumina NovaSeq 6000	AMPLICON	PCR
ERX4398891	ERR4458520	3	20200302	Illumina NovaSeq 6000	AMPLICON	PCR
ERX4398957	ERR4458586	3	20200302	Illumina NovaSeq 6000	AMPLICON	PCR
ERX4398958	ERR4458587	3	20200302	Illumina NovaSeq 6000	AMPLICON	PCR
ERX4363918	ERR4423360	3	20200303	Illumina NovaSeq 6000	AMPLICON	PCR
ERX4363962	ERR4423404	3	20200303	Illumina NovaSeq 6000	AMPLICON	PCR
ERX4364378	ERR4423820	3	20200303	Illumina NovaSeq 6000	AMPLICON	PCR
ERX4364396	ERR4423838	3	20200303	Illumina NovaSeq 6000	AMPLICON	PCR
ERX4364422	ERR4423864	3	20200303	Illumina NovaSeq 6000	AMPLICON	PCR
ERX4364464	ERR4423906	3	20200303	Illumina NovaSeq 6000	AMPLICON	PCR
ERX4364602	ERR4424044	3	20200303	Illumina NovaSeq 6000	AMPLICON	PCR
ERX4364642	ERR4424084	3	20200303	Illumina NovaSeq 6000	AMPLICON	PCR
ERX4365570	ERR4425012	3	20200303	Illumina NovaSeq 6000	AMPLICON	PCR
ERX4398932	ERR4458561	3	20200303	Illumina NovaSeq 6000	AMPLICON	PCR
ERX4398945	ERR4458574	3	20200303	Illumina NovaSeq 6000	AMPLICON	PCR
ERX4398947	ERR4458576	3	20200303	Illumina NovaSeq 6000	AMPLICON	PCR
ERX4398968	ERR4458597	3	20200303	Illumina NovaSeq 6000	AMPLICON	PCR
ERX4398982	ERR4458611	3	20200303	Illumina NovaSeq 6000	AMPLICON	PCR
ERX4398989	ERR4458618	3	20200303	Illumina NovaSeq 6000	AMPLICON	PCR
ERX4364515	ERR4423957	3	20200304	Illumina NovaSeq 6000	AMPLICON	PCR
ERX4398868	ERR4458497	3	20200304	Illumina NovaSeq 6000	AMPLICON	PCR
ERX4398922	ERR4458551	3	20200304	Illumina NovaSeq 6000	AMPLICON	PCR
ERX4398978	ERR4458607	3	20200304	Illumina NovaSeq 6000	AMPLICON	PCR
ERX4399026	ERR4458655	3	20200304	Illumina NovaSeq 6000	AMPLICON	PCR
ERX4363990	ERR4423432	3	20200305	Illumina NovaSeq 6000	AMPLICON	PCR
ERX4364524	ERR4423966	3	20200305	Illumina NovaSeq 6000	AMPLICON	PCR
ERX4364634	ERR4424076	3	20200305	Illumina NovaSeq 6000	AMPLICON	PCR
ERX4363988	ERR4423430	3	20200306	Illumina NovaSeq 6000	AMPLICON	PCR
ERX4364398	ERR4423840	3	20200306	Illumina NovaSeq 6000	AMPLICON	PCR
ERX4364433	ERR4423875	3	20200306	Illumina NovaSeq 6000	AMPLICON	PCR
ERX4364434	ERR4423876	3	20200306	Illumina NovaSeq 6000	AMPLICON	PCR
ERX4364442	ERR4423884	3	20200306	Illumina NovaSeq 6000	AMPLICON	PCR
ERX4364511	ERR4423953	3	20200306	Illumina NovaSeq 6000	AMPLICON	PCR
ERX4364551	ERR4423993	3	20200306	Illumina NovaSeq 6000	AMPLICON	PCR
ERX4364460	ERR4423902	3	20200307	Illumina NovaSeq 6000	AMPLICON	PCR
ERX4364542	ERR4423984	3	20200307	Illumina NovaSeq 6000	AMPLICON	PCR
ERX4364405	ERR4423847	3	20200308	Illumina NovaSeq 6000	AMPLICON	PCR
ERX4364496	ERR4423938	3	20200308	Illumina NovaSeq 6000	AMPLICON	PCR
ERX4398923	ERR4458552	3	20200308	Illumina NovaSeq 6000	AMPLICON	PCR
ERX4398938	ERR4458567	3	20200308	Illumina NovaSeq 6000	AMPLICON	PCR
ERX4516604	ERR4581065	3	20200308	Illumina NovaSeq 6000	AMPLICON	PCR
ERX4516614	ERR4581075	3	20200308	Illumina NovaSeq 6000	AMPLICON	PCR
ERX4363906	ERR4423348	3	20200309	Illumina NovaSeq 6000	AMPLICON	PCR
ERX4363914	ERR4423356	3	20200309	Illumina NovaSeq 6000	AMPLICON	PCR
ERX4363966	ERR4423408	3	20200309	Illumina NovaSeq 6000	AMPLICON	PCR
ERX4364536	ERR4423978	3	20200309	Illumina NovaSeq 6000	AMPLICON	PCR
ERX4398870	ERR4458499	3	20200309	Illumina NovaSeq 6000	AMPLICON	PCR
ERX4398911	ERR4458540	3	20200309	Illumina NovaSeq 6000	AMPLICON	PCR
ERX4398920	ERR4458549	3	20200309	Illumina NovaSeq 6000	AMPLICON	PCR
ERX4398943	ERR4458572	3	20200309	Illumina NovaSeq 6000	AMPLICON	PCR
ERX4398952	ERR4458581	3	20200309	Illumina NovaSeq 6000	AMPLICON	PCR
ERX4398962	ERR4458591	3	20200309	Illumina NovaSeq 6000	AMPLICON	PCR
ERX4516566	ERR4581027	3	20200309	Illumina NovaSeq 6000	AMPLICON	PCR
ERX4535923	ERR4603776	3	20200309	Illumina NovaSeq 6000	AMPLICON	PCR
ERX4535960	ERR4603813	3	20200309	Illumina NovaSeq 6000	AMPLICON	PCR
ERX4364400	ERR4423842	3	20200310	Illumina NovaSeq 6000	AMPLICON	PCR
ERX4364419	ERR4423861	3	20200310	Illumina NovaSeq 6000	AMPLICON	PCR
ERX4364491	ERR4423933	3	20200310	Illumina NovaSeq 6000	AMPLICON	PCR
ERX4364554	ERR4423996	3	20200310	Illumina NovaSeq 6000	AMPLICON	PCR
ERX4364601	ERR4424043	3	20200310	Illumina NovaSeq 6000	AMPLICON	PCR
ERX4364638	ERR4424080	3	20200310	Illumina NovaSeq 6000	AMPLICON	PCR
ERX4364773	ERR4424215	3	20200310	Illumina NovaSeq 6000	AMPLICON	PCR
ERX4365610	ERR4425052	3	20200310	Illumina NovaSeq 6000	AMPLICON	PCR
ERX4379344	ERR4438841	3	20200310	Illumina NovaSeq 6000	AMPLICON	PCR
ERX4398983	ERR4458612	3	20200310	Illumina NovaSeq 6000	AMPLICON	PCR
ERX4516560	ERR4581021	3	20200310	Illumina NovaSeq 6000	AMPLICON	PCR
ERX4516570	ERR4581031	3	20200310	Illumina NovaSeq 6000	AMPLICON	PCR
ERX4516575	ERR4581036	3	20200310	Illumina NovaSeq 6000	AMPLICON	PCR
ERX4516583	ERR4581044	3	20200310	Illumina NovaSeq 6000	AMPLICON	PCR
ERX4516641	ERR4581101	3	20200310	Illumina NovaSeq 6000	AMPLICON	PCR
ERX4536222	ERR4604075	3	20200310	Illumina NovaSeq 6000	AMPLICON	PCR
ERX4364366	ERR4423808	3	20200311	Illumina NovaSeq 6000	AMPLICON	PCR
ERX4364375	ERR4423817	3	20200311	Illumina NovaSeq 6000	AMPLICON	PCR
ERX4364377	ERR4423819	3	20200311	Illumina NovaSeq 6000	AMPLICON	PCR
ERX4364472	ERR4423914	3	20200311	Illumina NovaSeq 6000	AMPLICON	PCR
ERX4364543	ERR4423985	3	20200311	Illumina NovaSeq 6000	AMPLICON	PCR
ERX4364623	ERR4424065	3	20200311	Illumina NovaSeq 6000	AMPLICON	PCR
ERX4364843	ERR4424285	3	20200311	Illumina NovaSeq 6000	AMPLICON	PCR
ERX4364923	ERR4424365	3	20200311	Illumina NovaSeq 6000	AMPLICON	PCR
ERX4365524	ERR4424966	3	20200311	Illumina NovaSeq 6000	AMPLICON	PCR
ERX4398924	ERR4458553	3	20200311	Illumina NovaSeq 6000	AMPLICON	PCR
ERX4398949	ERR4458578	3	20200311	Illumina NovaSeq 6000	AMPLICON	PCR
ERX4398954	ERR4458583	3	20200311	Illumina NovaSeq 6000	AMPLICON	PCR
ERX4516558	ERR4581019	3	20200311	Illumina NovaSeq 6000	AMPLICON	PCR
ERX4516574	ERR4581035	3	20200311	Illumina NovaSeq 6000	AMPLICON	PCR
ERX4363624	ERR4423066	3	20200312	Illumina NovaSeq 6000	AMPLICON	PCR
ERX4363895	ERR4423337	3	20200312	Illumina NovaSeq 6000	AMPLICON	PCR
ERX4363922	ERR4423364	3	20200312	Illumina NovaSeq 6000	AMPLICON	PCR
ERX4363929	ERR4423371	3	20200312	Illumina NovaSeq 6000	AMPLICON	PCR
ERX4363965	ERR4423407	3	20200312	Illumina NovaSeq 6000	AMPLICON	PCR
ERX4364670	ERR4424112	3	20200312	Illumina NovaSeq 6000	AMPLICON	PCR
ERX4364745	ERR4424187	3	20200312	Illumina NovaSeq 6000	AMPLICON	PCR
ERX4364783	ERR4424225	3	20200312	Illumina NovaSeq 6000	AMPLICON	PCR
ERX4364852	ERR4424294	3	20200312	Illumina NovaSeq 6000	AMPLICON	PCR
ERX4364879	ERR4424321	3	20200312	Illumina NovaSeq 6000	AMPLICON	PCR
ERX4365551	ERR4424993	3	20200312	Illumina NovaSeq 6000	AMPLICON	PCR
ERX4379337	ERR4438834	3	20200312	Illumina NovaSeq 6000	AMPLICON	PCR
ERX4379346	ERR4438843	3	20200312	Illumina NovaSeq 6000	AMPLICON	PCR
ERX4398758	ERR4458387	3	20200312	Illumina NovaSeq 6000	AMPLICON	PCR
ERX4398762	ERR4458391	3	20200312	Illumina NovaSeq 6000	AMPLICON	PCR
ERX4398809	ERR4458438	3	20200312	Illumina NovaSeq 6000	AMPLICON	PCR
ERX4398845	ERR4458474	3	20200312	Illumina NovaSeq 6000	AMPLICON	PCR
ERX4398861	ERR4458490	3	20200312	Illumina NovaSeq 6000	AMPLICON	PCR
ERX4398890	ERR4458519	3	20200312	Illumina NovaSeq 6000	AMPLICON	PCR
ERX4516642	ERR4581102	3	20200312	Illumina NovaSeq 6000	AMPLICON	PCR
ERX4535964	ERR4603817	3	20200312	Illumina NovaSeq 6000	AMPLICON	PCR
ERX4536235	ERR4604088	3	20200312	Illumina NovaSeq 6000	AMPLICON	PCR
ERX4536240	ERR4604093	3	20200312	Illumina NovaSeq 6000	AMPLICON	PCR
ERX4363916	ERR4423358	3	20200313	Illumina NovaSeq 6000	AMPLICON	PCR
ERX4363950	ERR4423392	3	20200313	Illumina NovaSeq 6000	AMPLICON	PCR
ERX4363979	ERR4423421	3	20200313	Illumina NovaSeq 6000	AMPLICON	PCR
ERX4363993	ERR4423435	3	20200313	Illumina NovaSeq 6000	AMPLICON	PCR
ERX4364455	ERR4423897	3	20200313	Illumina NovaSeq 6000	AMPLICON	PCR
ERX4364727	ERR4424169	3	20200313	Illumina NovaSeq 6000	AMPLICON	PCR
ERX4364792	ERR4424234	3	20200313	Illumina NovaSeq 6000	AMPLICON	PCR
ERX4364803	ERR4424245	3	20200313	Illumina NovaSeq 6000	AMPLICON	PCR
ERX4364855	ERR4424297	3	20200313	Illumina NovaSeq 6000	AMPLICON	PCR
ERX4364905	ERR4424347	3	20200313	Illumina NovaSeq 6000	AMPLICON	PCR
ERX4364912	ERR4424354	3	20200313	Illumina NovaSeq 6000	AMPLICON	PCR
ERX4364917	ERR4424359	3	20200313	Illumina NovaSeq 6000	AMPLICON	PCR
ERX4365386	ERR4424828	3	20200313	Illumina NovaSeq 6000	AMPLICON	PCR
ERX4365491	ERR4424933	3	20200313	Illumina NovaSeq 6000	AMPLICON	PCR
ERX4398773	ERR4458402	3	20200313	Illumina NovaSeq 6000	AMPLICON	PCR
ERX4398778	ERR4458407	3	20200313	Illumina NovaSeq 6000	AMPLICON	PCR
ERX4398789	ERR4458418	3	20200313	Illumina NovaSeq 6000	AMPLICON	PCR
ERX4398792	ERR4458421	3	20200313	Illumina NovaSeq 6000	AMPLICON	PCR
ERX4398797	ERR4458426	3	20200313	Illumina NovaSeq 6000	AMPLICON	PCR
ERX4398804	ERR4458433	3	20200313	Illumina NovaSeq 6000	AMPLICON	PCR
ERX4398811	ERR4458440	3	20200313	Illumina NovaSeq 6000	AMPLICON	PCR
ERX4398815	ERR4458444	3	20200313	Illumina NovaSeq 6000	AMPLICON	PCR
ERX4398825	ERR4458454	3	20200313	Illumina NovaSeq 6000	AMPLICON	PCR
ERX4398834	ERR4458463	3	20200313	Illumina NovaSeq 6000	AMPLICON	PCR
ERX4398875	ERR4458504	3	20200313	Illumina NovaSeq 6000	AMPLICON	PCR
ERX4398955	ERR4458584	3	20200313	Illumina NovaSeq 6000	AMPLICON	PCR
ERX4398985	ERR4458614	3	20200313	Illumina NovaSeq 6000	AMPLICON	PCR
ERX4398995	ERR4458624	3	20200313	Illumina NovaSeq 6000	AMPLICON	PCR
ERX4399003	ERR4458632	3	20200313	Illumina NovaSeq 6000	AMPLICON	PCR
ERX4399006	ERR4458635	3	20200313	Illumina NovaSeq 6000	AMPLICON	PCR
ERX4399020	ERR4458649	3	20200313	Illumina NovaSeq 6000	AMPLICON	PCR
ERX4399128	ERR4458757	3	20200313	Illumina NovaSeq 6000	AMPLICON	PCR
ERX4516598	ERR4581059	3	20200313	Illumina NovaSeq 6000	AMPLICON	PCR
ERX4516623	ERR4581084	3	20200313	Illumina NovaSeq 6000	AMPLICON	PCR
ERX4363169	ERR4422611	3	20200314	Illumina NovaSeq 6000	AMPLICON	PCR
ERX4363766	ERR4423208	3	20200314	Illumina NovaSeq 6000	AMPLICON	PCR
ERX4363928	ERR4423370	3	20200314	Illumina NovaSeq 6000	AMPLICON	PCR
ERX4363985	ERR4423427	3	20200314	Illumina NovaSeq 6000	AMPLICON	PCR
ERX4364680	ERR4424122	3	20200314	Illumina NovaSeq 6000	AMPLICON	PCR
ERX4364715	ERR4424157	3	20200314	Illumina NovaSeq 6000	AMPLICON	PCR
ERX4364763	ERR4424205	3	20200314	Illumina NovaSeq 6000	AMPLICON	PCR
ERX4364793	ERR4424235	3	20200314	Illumina NovaSeq 6000	AMPLICON	PCR
ERX4379363	ERR4438860	3	20200314	Illumina NovaSeq 6000	AMPLICON	PCR
ERX4379405	ERR4438902	3	20200314	Illumina NovaSeq 6000	AMPLICON	PCR
ERX4398764	ERR4458393	3	20200314	Illumina NovaSeq 6000	AMPLICON	PCR
ERX4398765	ERR4458394	3	20200314	Illumina NovaSeq 6000	AMPLICON	PCR
ERX4398767	ERR4458396	3	20200314	Illumina NovaSeq 6000	AMPLICON	PCR
ERX4398788	ERR4458417	3	20200314	Illumina NovaSeq 6000	AMPLICON	PCR
ERX4398796	ERR4458425	3	20200314	Illumina NovaSeq 6000	AMPLICON	PCR
ERX4398806	ERR4458435	3	20200314	Illumina NovaSeq 6000	AMPLICON	PCR
ERX4398807	ERR4458436	3	20200314	Illumina NovaSeq 6000	AMPLICON	PCR
ERX4398820	ERR4458449	3	20200314	Illumina NovaSeq 6000	AMPLICON	PCR
ERX4398844	ERR4458473	3	20200314	Illumina NovaSeq 6000	AMPLICON	PCR
ERX4398894	ERR4458523	3	20200314	Illumina NovaSeq 6000	AMPLICON	PCR
ERX4398896	ERR4458525	3	20200314	Illumina NovaSeq 6000	AMPLICON	PCR
ERX4398906	ERR4458535	3	20200314	Illumina NovaSeq 6000	AMPLICON	PCR
ERX4399008	ERR4458637	3	20200314	Illumina NovaSeq 6000	AMPLICON	PCR
ERX4399009	ERR4458638	3	20200314	Illumina NovaSeq 6000	AMPLICON	PCR
ERX4399032	ERR4458661	3	20200314	Illumina NovaSeq 6000	AMPLICON	PCR
ERX4516612	ERR4581073	3	20200314	Illumina NovaSeq 6000	AMPLICON	PCR
ERX4516613	ERR4581074	3	20200314	Illumina NovaSeq 6000	AMPLICON	PCR
ERX4516694	ERR4581154	3	20200314	Illumina NovaSeq 6000	AMPLICON	PCR
ERX4535940	ERR4603793	3	20200314	Illumina NovaSeq 6000	AMPLICON	PCR
ERX4536211	ERR4604064	3	20200314	Illumina NovaSeq 6000	AMPLICON	PCR
ERX4363786	ERR4423228	3	20200315	Illumina NovaSeq 6000	AMPLICON	PCR
ERX4363865	ERR4423307	3	20200315	Illumina NovaSeq 6000	AMPLICON	PCR
ERX4363907	ERR4423349	3	20200315	Illumina NovaSeq 6000	AMPLICON	PCR
ERX4363945	ERR4423387	3	20200315	Illumina NovaSeq 6000	AMPLICON	PCR
ERX4363956	ERR4423398	3	20200315	Illumina NovaSeq 6000	AMPLICON	PCR
ERX4363960	ERR4423402	3	20200315	Illumina NovaSeq 6000	AMPLICON	PCR
ERX4398759	ERR4458388	3	20200315	Illumina NovaSeq 6000	AMPLICON	PCR
ERX4398787	ERR4458416	3	20200315	Illumina NovaSeq 6000	AMPLICON	PCR
ERX4398808	ERR4458437	3	20200315	Illumina NovaSeq 6000	AMPLICON	PCR
ERX4398816	ERR4458445	3	20200315	Illumina NovaSeq 6000	AMPLICON	PCR
ERX4398839	ERR4458468	3	20200315	Illumina NovaSeq 6000	AMPLICON	PCR
ERX4398846	ERR4458475	3	20200315	Illumina NovaSeq 6000	AMPLICON	PCR
ERX4398855	ERR4458484	3	20200315	Illumina NovaSeq 6000	AMPLICON	PCR
ERX4398873	ERR4458502	3	20200315	Illumina NovaSeq 6000	AMPLICON	PCR
ERX4398909	ERR4458538	3	20200315	Illumina NovaSeq 6000	AMPLICON	PCR
ERX4398929	ERR4458558	3	20200315	Illumina NovaSeq 6000	AMPLICON	PCR
ERX4398933	ERR4458562	3	20200315	Illumina NovaSeq 6000	AMPLICON	PCR
ERX4398981	ERR4458610	3	20200315	Illumina NovaSeq 6000	AMPLICON	PCR
ERX4516594	ERR4581055	3	20200315	Illumina NovaSeq 6000	AMPLICON	PCR
ERX4516596	ERR4581057	3	20200315	Illumina NovaSeq 6000	AMPLICON	PCR
ERX4516615	ERR4581076	3	20200315	Illumina NovaSeq 6000	AMPLICON	PCR
ERX4516616	ERR4581077	3	20200315	Illumina NovaSeq 6000	AMPLICON	PCR
ERX4516617	ERR4581078	3	20200315	Illumina NovaSeq 6000	AMPLICON	PCR
ERX4516634	ERR4581094	3	20200315	Illumina NovaSeq 6000	AMPLICON	PCR
ERX4516636	ERR4581096	3	20200315	Illumina NovaSeq 6000	AMPLICON	PCR
ERX4363643	ERR4423085	3	20200316	Illumina NovaSeq 6000	AMPLICON	PCR
ERX4363908	ERR4423350	3	20200316	Illumina NovaSeq 6000	AMPLICON	PCR
ERX4363925	ERR4423367	3	20200316	Illumina NovaSeq 6000	AMPLICON	PCR
ERX4363930	ERR4423372	3	20200316	Illumina NovaSeq 6000	AMPLICON	PCR
ERX4363937	ERR4423379	3	20200316	Illumina NovaSeq 6000	AMPLICON	PCR
ERX4363944	ERR4423386	3	20200316	Illumina NovaSeq 6000	AMPLICON	PCR
ERX4364704	ERR4424146	3	20200316	Illumina NovaSeq 6000	AMPLICON	PCR
ERX4364712	ERR4424154	3	20200316	Illumina NovaSeq 6000	AMPLICON	PCR
ERX4364836	ERR4424278	3	20200316	Illumina NovaSeq 6000	AMPLICON	PCR
ERX4398763	ERR4458392	3	20200316	Illumina NovaSeq 6000	AMPLICON	PCR
ERX4398766	ERR4458395	3	20200316	Illumina NovaSeq 6000	AMPLICON	PCR
ERX4398768	ERR4458397	3	20200316	Illumina NovaSeq 6000	AMPLICON	PCR
ERX4398771	ERR4458400	3	20200316	Illumina NovaSeq 6000	AMPLICON	PCR
ERX4398777	ERR4458406	3	20200316	Illumina NovaSeq 6000	AMPLICON	PCR
ERX4398791	ERR4458420	3	20200316	Illumina NovaSeq 6000	AMPLICON	PCR
ERX4398793	ERR4458422	3	20200316	Illumina NovaSeq 6000	AMPLICON	PCR
ERX4398795	ERR4458424	3	20200316	Illumina NovaSeq 6000	AMPLICON	PCR
ERX4398818	ERR4458447	3	20200316	Illumina NovaSeq 6000	AMPLICON	PCR
ERX4398819	ERR4458448	3	20200316	Illumina NovaSeq 6000	AMPLICON	PCR
ERX4398841	ERR4458470	3	20200316	Illumina NovaSeq 6000	AMPLICON	PCR
ERX4398858	ERR4458487	3	20200316	Illumina NovaSeq 6000	AMPLICON	PCR
ERX4398859	ERR4458488	3	20200316	Illumina NovaSeq 6000	AMPLICON	PCR
ERX4398860	ERR4458489	3	20200316	Illumina NovaSeq 6000	AMPLICON	PCR
ERX4398869	ERR4458498	3	20200316	Illumina NovaSeq 6000	AMPLICON	PCR
ERX4398884	ERR4458513	3	20200316	Illumina NovaSeq 6000	AMPLICON	PCR
ERX4398902	ERR4458531	3	20200316	Illumina NovaSeq 6000	AMPLICON	PCR
ERX4398948	ERR4458577	3	20200316	Illumina NovaSeq 6000	AMPLICON	PCR
ERX4398953	ERR4458582	3	20200316	Illumina NovaSeq 6000	AMPLICON	PCR
ERX4516551	ERR4581012	3	20200316	Illumina NovaSeq 6000	AMPLICON	PCR
ERX4516562	ERR4581023	3	20200316	Illumina NovaSeq 6000	AMPLICON	PCR
ERX4516587	ERR4581048	3	20200316	Illumina NovaSeq 6000	AMPLICON	PCR
ERX4516608	ERR4581069	3	20200316	Illumina NovaSeq 6000	AMPLICON	PCR
ERX4516619	ERR4581080	3	20200316	Illumina NovaSeq 6000	AMPLICON	PCR
ERX4516627	ERR4581088	3	20200316	Illumina NovaSeq 6000	AMPLICON	PCR
ERX4516628	ERR4581089	3	20200316	Illumina NovaSeq 6000	AMPLICON	PCR
ERX4516631	ERR4581092	3	20200316	Illumina NovaSeq 6000	AMPLICON	PCR
ERX4516639	ERR4581099	3	20200316	Illumina NovaSeq 6000	AMPLICON	PCR
ERX4516693	ERR4581153	3	20200316	Illumina NovaSeq 6000	AMPLICON	PCR
ERX4363746	ERR4423188	3	20200317	Illumina NovaSeq 6000	AMPLICON	PCR
ERX4363902	ERR4423344	3	20200317	Illumina NovaSeq 6000	AMPLICON	PCR
ERX4363924	ERR4423366	3	20200317	Illumina NovaSeq 6000	AMPLICON	PCR
ERX4363932	ERR4423374	3	20200317	Illumina NovaSeq 6000	AMPLICON	PCR
ERX4363951	ERR4423393	3	20200317	Illumina NovaSeq 6000	AMPLICON	PCR
ERX4363968	ERR4423410	3	20200317	Illumina NovaSeq 6000	AMPLICON	PCR
ERX4364778	ERR4424220	3	20200317	Illumina NovaSeq 6000	AMPLICON	PCR
ERX4378079	ERR4437576	3	20200317	Illumina NovaSeq 6000	AMPLICON	PCR
ERX4378083	ERR4437580	3	20200317	Illumina NovaSeq 6000	AMPLICON	PCR
ERX4398760	ERR4458389	3	20200317	Illumina NovaSeq 6000	AMPLICON	PCR
ERX4398770	ERR4458399	3	20200317	Illumina NovaSeq 6000	AMPLICON	PCR
ERX4398779	ERR4458408	3	20200317	Illumina NovaSeq 6000	AMPLICON	PCR
ERX4398780	ERR4458409	3	20200317	Illumina NovaSeq 6000	AMPLICON	PCR
ERX4398783	ERR4458412	3	20200317	Illumina NovaSeq 6000	AMPLICON	PCR
ERX4398784	ERR4458413	3	20200317	Illumina NovaSeq 6000	AMPLICON	PCR
ERX4398794	ERR4458423	3	20200317	Illumina NovaSeq 6000	AMPLICON	PCR
ERX4398799	ERR4458428	3	20200317	Illumina NovaSeq 6000	AMPLICON	PCR
ERX4398810	ERR4458439	3	20200317	Illumina NovaSeq 6000	AMPLICON	PCR
ERX4398832	ERR4458461	3	20200317	Illumina NovaSeq 6000	AMPLICON	PCR
ERX4398847	ERR4458476	3	20200317	Illumina NovaSeq 6000	AMPLICON	PCR
ERX4398848	ERR4458477	3	20200317	Illumina NovaSeq 6000	AMPLICON	PCR
ERX4398849	ERR4458478	3	20200317	Illumina NovaSeq 6000	AMPLICON	PCR
ERX4398851	ERR4458480	3	20200317	Illumina NovaSeq 6000	AMPLICON	PCR
ERX4398882	ERR4458511	3	20200317	Illumina NovaSeq 6000	AMPLICON	PCR
ERX4398899	ERR4458528	3	20200317	Illumina NovaSeq 6000	AMPLICON	PCR
ERX4398931	ERR4458560	3	20200317	Illumina NovaSeq 6000	AMPLICON	PCR
ERX4398934	ERR4458563	3	20200317	Illumina NovaSeq 6000	AMPLICON	PCR
ERX4398939	ERR4458568	3	20200317	Illumina NovaSeq 6000	AMPLICON	PCR
ERX4398965	ERR4458594	3	20200317	Illumina NovaSeq 6000	AMPLICON	PCR
ERX4398966	ERR4458595	3	20200317	Illumina NovaSeq 6000	AMPLICON	PCR
ERX4398975	ERR4458604	3	20200317	Illumina NovaSeq 6000	AMPLICON	PCR
ERX4399000	ERR4458629	3	20200317	Illumina NovaSeq 6000	AMPLICON	PCR
ERX4399011	ERR4458640	3	20200317	Illumina NovaSeq 6000	AMPLICON	PCR
ERX4399185	ERR4458814	3	20200317	Illumina NovaSeq 6000	AMPLICON	PCR
ERX4399192	ERR4458821	3	20200317	Illumina NovaSeq 6000	AMPLICON	PCR
ERX4403466	ERR4463095	3	20200317	Illumina NovaSeq 6000	AMPLICON	PCR
ERX4403470	ERR4463099	3	20200317	Illumina NovaSeq 6000	AMPLICON	PCR
ERX4403475	ERR4463104	3	20200317	Illumina NovaSeq 6000	AMPLICON	PCR
ERX4516541	ERR4581002	3	20200317	Illumina NovaSeq 6000	AMPLICON	PCR
ERX4516545	ERR4581006	3	20200317	Illumina NovaSeq 6000	AMPLICON	PCR
ERX4516547	ERR4581008	3	20200317	Illumina NovaSeq 6000	AMPLICON	PCR
ERX4516554	ERR4581015	3	20200317	Illumina NovaSeq 6000	AMPLICON	PCR
ERX4516556	ERR4581017	3	20200317	Illumina NovaSeq 6000	AMPLICON	PCR
ERX4516557	ERR4581018	3	20200317	Illumina NovaSeq 6000	AMPLICON	PCR
ERX4516569	ERR4581030	3	20200317	Illumina NovaSeq 6000	AMPLICON	PCR
ERX4516578	ERR4581039	3	20200317	Illumina NovaSeq 6000	AMPLICON	PCR
ERX4516590	ERR4581051	3	20200317	Illumina NovaSeq 6000	AMPLICON	PCR
ERX4516591	ERR4581052	3	20200317	Illumina NovaSeq 6000	AMPLICON	PCR
ERX4516592	ERR4581053	3	20200317	Illumina NovaSeq 6000	AMPLICON	PCR
ERX4535956	ERR4603809	3	20200317	Illumina NovaSeq 6000	AMPLICON	PCR
ERX4536212	ERR4604065	3	20200317	Illumina NovaSeq 6000	AMPLICON	PCR
ERX4363666	ERR4423108	3	20200318	Illumina NovaSeq 6000	AMPLICON	PCR
ERX4363699	ERR4423141	3	20200318	Illumina NovaSeq 6000	AMPLICON	PCR
ERX4363915	ERR4423357	3	20200318	Illumina NovaSeq 6000	AMPLICON	PCR
ERX4363920	ERR4423362	3	20200318	Illumina NovaSeq 6000	AMPLICON	PCR
ERX4363953	ERR4423395	3	20200318	Illumina NovaSeq 6000	AMPLICON	PCR
ERX4363958	ERR4423400	3	20200318	Illumina NovaSeq 6000	AMPLICON	PCR
ERX4363964	ERR4423406	3	20200318	Illumina NovaSeq 6000	AMPLICON	PCR
ERX4363977	ERR4423419	3	20200318	Illumina NovaSeq 6000	AMPLICON	PCR
ERX4363982	ERR4423424	3	20200318	Illumina NovaSeq 6000	AMPLICON	PCR
ERX4363987	ERR4423429	3	20200318	Illumina NovaSeq 6000	AMPLICON	PCR
ERX4378008	ERR4437505	3	20200318	Illumina NovaSeq 6000	AMPLICON	PCR
ERX4378012	ERR4437509	3	20200318	Illumina NovaSeq 6000	AMPLICON	PCR
ERX4378047	ERR4437544	3	20200318	Illumina NovaSeq 6000	AMPLICON	PCR
ERX4398785	ERR4458414	3	20200318	Illumina NovaSeq 6000	AMPLICON	PCR
ERX4398801	ERR4458430	3	20200318	Illumina NovaSeq 6000	AMPLICON	PCR
ERX4398812	ERR4458441	3	20200318	Illumina NovaSeq 6000	AMPLICON	PCR
ERX4398822	ERR4458451	3	20200318	Illumina NovaSeq 6000	AMPLICON	PCR
ERX4398856	ERR4458485	3	20200318	Illumina NovaSeq 6000	AMPLICON	PCR
ERX4398864	ERR4458493	3	20200318	Illumina NovaSeq 6000	AMPLICON	PCR
ERX4398867	ERR4458496	3	20200318	Illumina NovaSeq 6000	AMPLICON	PCR
ERX4398872	ERR4458501	3	20200318	Illumina NovaSeq 6000	AMPLICON	PCR
ERX4398881	ERR4458510	3	20200318	Illumina NovaSeq 6000	AMPLICON	PCR
ERX4398908	ERR4458537	3	20200318	Illumina NovaSeq 6000	AMPLICON	PCR
ERX4398927	ERR4458556	3	20200318	Illumina NovaSeq 6000	AMPLICON	PCR
ERX4398937	ERR4458566	3	20200318	Illumina NovaSeq 6000	AMPLICON	PCR
ERX4398951	ERR4458580	3	20200318	Illumina NovaSeq 6000	AMPLICON	PCR
ERX4398974	ERR4458603	3	20200318	Illumina NovaSeq 6000	AMPLICON	PCR
ERX4398976	ERR4458605	3	20200318	Illumina NovaSeq 6000	AMPLICON	PCR
ERX4398984	ERR4458613	3	20200318	Illumina NovaSeq 6000	AMPLICON	PCR
ERX4398986	ERR4458615	3	20200318	Illumina NovaSeq 6000	AMPLICON	PCR
ERX4398988	ERR4458617	3	20200318	Illumina NovaSeq 6000	AMPLICON	PCR
ERX4399007	ERR4458636	3	20200318	Illumina NovaSeq 6000	AMPLICON	PCR
ERX4399010	ERR4458639	3	20200318	Illumina NovaSeq 6000	AMPLICON	PCR
ERX4399022	ERR4458651	3	20200318	Illumina NovaSeq 6000	AMPLICON	PCR
ERX4399025	ERR4458654	3	20200318	Illumina NovaSeq 6000	AMPLICON	PCR
ERX4399033	ERR4458662	3	20200318	Illumina NovaSeq 6000	AMPLICON	PCR
ERX4399089	ERR4458718	3	20200318	Illumina NovaSeq 6000	AMPLICON	PCR
ERX4399122	ERR4458751	3	20200318	Illumina NovaSeq 6000	AMPLICON	PCR
ERX4399206	ERR4458835	3	20200318	Illumina NovaSeq 6000	AMPLICON	PCR
ERX4403442	ERR4463071	3	20200318	Illumina NovaSeq 6000	AMPLICON	PCR
ERX4403447	ERR4463076	3	20200318	Illumina NovaSeq 6000	AMPLICON	PCR
ERX4403454	ERR4463083	3	20200318	Illumina NovaSeq 6000	AMPLICON	PCR
ERX4403457	ERR4463086	3	20200318	Illumina NovaSeq 6000	AMPLICON	PCR
ERX4403460	ERR4463089	3	20200318	Illumina NovaSeq 6000	AMPLICON	PCR
ERX4403469	ERR4463098	3	20200318	Illumina NovaSeq 6000	AMPLICON	PCR
ERX4403471	ERR4463100	3	20200318	Illumina NovaSeq 6000	AMPLICON	PCR
ERX4403478	ERR4463107	3	20200318	Illumina NovaSeq 6000	AMPLICON	PCR
ERX4403481	ERR4463110	3	20200318	Illumina NovaSeq 6000	AMPLICON	PCR
ERX4403482	ERR4463111	3	20200318	Illumina NovaSeq 6000	AMPLICON	PCR
ERX4403490	ERR4463119	3	20200318	Illumina NovaSeq 6000	AMPLICON	PCR
ERX4403494	ERR4463123	3	20200318	Illumina NovaSeq 6000	AMPLICON	PCR
ERX4403497	ERR4463126	3	20200318	Illumina NovaSeq 6000	AMPLICON	PCR
ERX4403499	ERR4463128	3	20200318	Illumina NovaSeq 6000	AMPLICON	PCR
ERX4403509	ERR4463138	3	20200318	Illumina NovaSeq 6000	AMPLICON	PCR
ERX4403511	ERR4463140	3	20200318	Illumina NovaSeq 6000	AMPLICON	PCR
ERX4516549	ERR4581010	3	20200318	Illumina NovaSeq 6000	AMPLICON	PCR
ERX4516555	ERR4581016	3	20200318	Illumina NovaSeq 6000	AMPLICON	PCR
ERX4516564	ERR4581025	3	20200318	Illumina NovaSeq 6000	AMPLICON	PCR
ERX4516601	ERR4581062	3	20200318	Illumina NovaSeq 6000	AMPLICON	PCR
ERX4516632	ERR4581093	3	20200318	Illumina NovaSeq 6000	AMPLICON	PCR
ERX4535924	ERR4603777	3	20200318	Illumina NovaSeq 6000	AMPLICON	PCR
ERX4363678	ERR4423120	3	20200319	Illumina NovaSeq 6000	AMPLICON	PCR
ERX4363685	ERR4423127	3	20200319	Illumina NovaSeq 6000	AMPLICON	PCR
ERX4363712	ERR4423154	3	20200319	Illumina NovaSeq 6000	AMPLICON	PCR
ERX4363730	ERR4423172	3	20200319	Illumina NovaSeq 6000	AMPLICON	PCR
ERX4363831	ERR4423273	3	20200319	Illumina NovaSeq 6000	AMPLICON	PCR
ERX4363921	ERR4423363	3	20200319	Illumina NovaSeq 6000	AMPLICON	PCR
ERX4363923	ERR4423365	3	20200319	Illumina NovaSeq 6000	AMPLICON	PCR
ERX4363948	ERR4423390	3	20200319	Illumina NovaSeq 6000	AMPLICON	PCR
ERX4363980	ERR4423422	3	20200319	Illumina NovaSeq 6000	AMPLICON	PCR
ERX4363983	ERR4423425	3	20200319	Illumina NovaSeq 6000	AMPLICON	PCR
ERX4363992	ERR4423434	3	20200319	Illumina NovaSeq 6000	AMPLICON	PCR
ERX4365310	ERR4424752	3	20200319	Illumina NovaSeq 6000	AMPLICON	PCR
ERX4378005	ERR4437502	3	20200319	Illumina NovaSeq 6000	AMPLICON	PCR
ERX4378033	ERR4437530	3	20200319	Illumina NovaSeq 6000	AMPLICON	PCR
ERX4378086	ERR4437583	3	20200319	Illumina NovaSeq 6000	AMPLICON	PCR
ERX4398757	ERR4458386	3	20200319	Illumina NovaSeq 6000	AMPLICON	PCR
ERX4398857	ERR4458486	3	20200319	Illumina NovaSeq 6000	AMPLICON	PCR
ERX4398901	ERR4458530	3	20200319	Illumina NovaSeq 6000	AMPLICON	PCR
ERX4398960	ERR4458589	3	20200319	Illumina NovaSeq 6000	AMPLICON	PCR
ERX4398969	ERR4458598	3	20200319	Illumina NovaSeq 6000	AMPLICON	PCR
ERX4399062	ERR4458691	3	20200319	Illumina NovaSeq 6000	AMPLICON	PCR
ERX4399066	ERR4458695	3	20200319	Illumina NovaSeq 6000	AMPLICON	PCR
ERX4399069	ERR4458698	3	20200319	Illumina NovaSeq 6000	AMPLICON	PCR
ERX4399099	ERR4458728	3	20200319	Illumina NovaSeq 6000	AMPLICON	PCR
ERX4399111	ERR4458740	3	20200319	Illumina NovaSeq 6000	AMPLICON	PCR
ERX4399116	ERR4458745	3	20200319	Illumina NovaSeq 6000	AMPLICON	PCR
ERX4399119	ERR4458748	3	20200319	Illumina NovaSeq 6000	AMPLICON	PCR
ERX4399124	ERR4458753	3	20200319	Illumina NovaSeq 6000	AMPLICON	PCR
ERX4399155	ERR4458784	3	20200319	Illumina NovaSeq 6000	AMPLICON	PCR
ERX4399156	ERR4458785	3	20200319	Illumina NovaSeq 6000	AMPLICON	PCR
ERX4399179	ERR4458808	3	20200319	Illumina NovaSeq 6000	AMPLICON	PCR
ERX4399180	ERR4458809	3	20200319	Illumina NovaSeq 6000	AMPLICON	PCR
ERX4399187	ERR4458816	3	20200319	Illumina NovaSeq 6000	AMPLICON	PCR
ERX4399190	ERR4458819	3	20200319	Illumina NovaSeq 6000	AMPLICON	PCR
ERX4399211	ERR4458840	3	20200319	Illumina NovaSeq 6000	AMPLICON	PCR
ERX4403441	ERR4463070	3	20200319	Illumina NovaSeq 6000	AMPLICON	PCR
ERX4403443	ERR4463072	3	20200319	Illumina NovaSeq 6000	AMPLICON	PCR
ERX4403444	ERR4463073	3	20200319	Illumina NovaSeq 6000	AMPLICON	PCR
ERX4403445	ERR4463074	3	20200319	Illumina NovaSeq 6000	AMPLICON	PCR
ERX4403446	ERR4463075	3	20200319	Illumina NovaSeq 6000	AMPLICON	PCR
ERX4403448	ERR4463077	3	20200319	Illumina NovaSeq 6000	AMPLICON	PCR
ERX4403452	ERR4463081	3	20200319	Illumina NovaSeq 6000	AMPLICON	PCR
ERX4403455	ERR4463084	3	20200319	Illumina NovaSeq 6000	AMPLICON	PCR
ERX4403462	ERR4463091	3	20200319	Illumina NovaSeq 6000	AMPLICON	PCR
ERX4403463	ERR4463092	3	20200319	Illumina NovaSeq 6000	AMPLICON	PCR
ERX4403472	ERR4463101	3	20200319	Illumina NovaSeq 6000	AMPLICON	PCR
ERX4403476	ERR4463105	3	20200319	Illumina NovaSeq 6000	AMPLICON	PCR
ERX4403480	ERR4463109	3	20200319	Illumina NovaSeq 6000	AMPLICON	PCR
ERX4403484	ERR4463113	3	20200319	Illumina NovaSeq 6000	AMPLICON	PCR
ERX4403485	ERR4463114	3	20200319	Illumina NovaSeq 6000	AMPLICON	PCR
ERX4403486	ERR4463115	3	20200319	Illumina NovaSeq 6000	AMPLICON	PCR
ERX4403489	ERR4463118	3	20200319	Illumina NovaSeq 6000	AMPLICON	PCR
ERX4403491	ERR4463120	3	20200319	Illumina NovaSeq 6000	AMPLICON	PCR
ERX4403493	ERR4463122	3	20200319	Illumina NovaSeq 6000	AMPLICON	PCR
ERX4403495	ERR4463124	3	20200319	Illumina NovaSeq 6000	AMPLICON	PCR
ERX4403496	ERR4463125	3	20200319	Illumina NovaSeq 6000	AMPLICON	PCR
ERX4403498	ERR4463127	3	20200319	Illumina NovaSeq 6000	AMPLICON	PCR
ERX4403500	ERR4463129	3	20200319	Illumina NovaSeq 6000	AMPLICON	PCR
ERX4403502	ERR4463131	3	20200319	Illumina NovaSeq 6000	AMPLICON	PCR
ERX4403506	ERR4463135	3	20200319	Illumina NovaSeq 6000	AMPLICON	PCR
ERX4403508	ERR4463137	3	20200319	Illumina NovaSeq 6000	AMPLICON	PCR
ERX4403513	ERR4463142	3	20200319	Illumina NovaSeq 6000	AMPLICON	PCR
ERX4403514	ERR4463143	3	20200319	Illumina NovaSeq 6000	AMPLICON	PCR
ERX4516572	ERR4581033	3	20200319	Illumina NovaSeq 6000	AMPLICON	PCR
ERX4516580	ERR4581041	3	20200319	Illumina NovaSeq 6000	AMPLICON	PCR
ERX4516618	ERR4581079	3	20200319	Illumina NovaSeq 6000	AMPLICON	PCR
ERX4363151	ERR4422593	3	20200320	Illumina NovaSeq 6000	AMPLICON	PCR
ERX4363160	ERR4422602	3	20200320	Illumina NovaSeq 6000	AMPLICON	PCR
ERX4363738	ERR4423180	3	20200320	Illumina NovaSeq 6000	AMPLICON	PCR
ERX4363758	ERR4423200	3	20200320	Illumina NovaSeq 6000	AMPLICON	PCR
ERX4363832	ERR4423274	3	20200320	Illumina NovaSeq 6000	AMPLICON	PCR
ERX4363901	ERR4423343	3	20200320	Illumina NovaSeq 6000	AMPLICON	PCR
ERX4363910	ERR4423352	3	20200320	Illumina NovaSeq 6000	AMPLICON	PCR
ERX4363913	ERR4423355	3	20200320	Illumina NovaSeq 6000	AMPLICON	PCR
ERX4363927	ERR4423369	3	20200320	Illumina NovaSeq 6000	AMPLICON	PCR
ERX4363942	ERR4423384	3	20200320	Illumina NovaSeq 6000	AMPLICON	PCR
ERX4363952	ERR4423394	3	20200320	Illumina NovaSeq 6000	AMPLICON	PCR
ERX4363957	ERR4423399	3	20200320	Illumina NovaSeq 6000	AMPLICON	PCR
ERX4363963	ERR4423405	3	20200320	Illumina NovaSeq 6000	AMPLICON	PCR
ERX4363969	ERR4423411	3	20200320	Illumina NovaSeq 6000	AMPLICON	PCR
ERX4377958	ERR4437455	3	20200320	Illumina NovaSeq 6000	AMPLICON	PCR
ERX4377964	ERR4437461	3	20200320	Illumina NovaSeq 6000	AMPLICON	PCR
ERX4377978	ERR4437475	3	20200320	Illumina NovaSeq 6000	AMPLICON	PCR
ERX4377994	ERR4437491	3	20200320	Illumina NovaSeq 6000	AMPLICON	PCR
ERX4378013	ERR4437510	3	20200320	Illumina NovaSeq 6000	AMPLICON	PCR
ERX4378025	ERR4437522	3	20200320	Illumina NovaSeq 6000	AMPLICON	PCR
ERX4378026	ERR4437523	3	20200320	Illumina NovaSeq 6000	AMPLICON	PCR
ERX4378030	ERR4437527	3	20200320	Illumina NovaSeq 6000	AMPLICON	PCR
ERX4398880	ERR4458509	3	20200320	Illumina NovaSeq 6000	AMPLICON	PCR
ERX4398898	ERR4458527	3	20200320	Illumina NovaSeq 6000	AMPLICON	PCR
ERX4398914	ERR4458543	3	20200320	Illumina NovaSeq 6000	AMPLICON	PCR
ERX4398930	ERR4458559	3	20200320	Illumina NovaSeq 6000	AMPLICON	PCR
ERX4398961	ERR4458590	3	20200320	Illumina NovaSeq 6000	AMPLICON	PCR
ERX4398967	ERR4458596	3	20200320	Illumina NovaSeq 6000	AMPLICON	PCR
ERX4399018	ERR4458647	3	20200320	Illumina NovaSeq 6000	AMPLICON	PCR
ERX4399023	ERR4458652	3	20200320	Illumina NovaSeq 6000	AMPLICON	PCR
ERX4399051	ERR4458680	3	20200320	Illumina NovaSeq 6000	AMPLICON	PCR
ERX4399055	ERR4458684	3	20200320	Illumina NovaSeq 6000	AMPLICON	PCR
ERX4399057	ERR4458686	3	20200320	Illumina NovaSeq 6000	AMPLICON	PCR
ERX4399064	ERR4458693	3	20200320	Illumina NovaSeq 6000	AMPLICON	PCR
ERX4399067	ERR4458696	3	20200320	Illumina NovaSeq 6000	AMPLICON	PCR
ERX4399071	ERR4458700	3	20200320	Illumina NovaSeq 6000	AMPLICON	PCR
ERX4399075	ERR4458704	3	20200320	Illumina NovaSeq 6000	AMPLICON	PCR
ERX4399080	ERR4458709	3	20200320	Illumina NovaSeq 6000	AMPLICON	PCR
ERX4399096	ERR4458725	3	20200320	Illumina NovaSeq 6000	AMPLICON	PCR
ERX4399097	ERR4458726	3	20200320	Illumina NovaSeq 6000	AMPLICON	PCR
ERX4399103	ERR4458732	3	20200320	Illumina NovaSeq 6000	AMPLICON	PCR
ERX4399107	ERR4458736	3	20200320	Illumina NovaSeq 6000	AMPLICON	PCR
ERX4399109	ERR4458738	3	20200320	Illumina NovaSeq 6000	AMPLICON	PCR
ERX4399123	ERR4458752	3	20200320	Illumina NovaSeq 6000	AMPLICON	PCR
ERX4399145	ERR4458774	3	20200320	Illumina NovaSeq 6000	AMPLICON	PCR
ERX4399151	ERR4458780	3	20200320	Illumina NovaSeq 6000	AMPLICON	PCR
ERX4399152	ERR4458781	3	20200320	Illumina NovaSeq 6000	AMPLICON	PCR
ERX4399158	ERR4458787	3	20200320	Illumina NovaSeq 6000	AMPLICON	PCR
ERX4399182	ERR4458811	3	20200320	Illumina NovaSeq 6000	AMPLICON	PCR
ERX4399189	ERR4458818	3	20200320	Illumina NovaSeq 6000	AMPLICON	PCR
ERX4399191	ERR4458820	3	20200320	Illumina NovaSeq 6000	AMPLICON	PCR
ERX4399193	ERR4458822	3	20200320	Illumina NovaSeq 6000	AMPLICON	PCR
ERX4399198	ERR4458827	3	20200320	Illumina NovaSeq 6000	AMPLICON	PCR
ERX4399200	ERR4458829	3	20200320	Illumina NovaSeq 6000	AMPLICON	PCR
ERX4399202	ERR4458831	3	20200320	Illumina NovaSeq 6000	AMPLICON	PCR
ERX4402907	ERR4462536	3	20200320	Illumina NovaSeq 6000	AMPLICON	PCR
ERX4402922	ERR4462551	3	20200320	Illumina NovaSeq 6000	AMPLICON	PCR
ERX4403449	ERR4463078	3	20200320	Illumina NovaSeq 6000	AMPLICON	PCR
ERX4403450	ERR4463079	3	20200320	Illumina NovaSeq 6000	AMPLICON	PCR
ERX4403451	ERR4463080	3	20200320	Illumina NovaSeq 6000	AMPLICON	PCR
ERX4403453	ERR4463082	3	20200320	Illumina NovaSeq 6000	AMPLICON	PCR
ERX4403458	ERR4463087	3	20200320	Illumina NovaSeq 6000	AMPLICON	PCR
ERX4403459	ERR4463088	3	20200320	Illumina NovaSeq 6000	AMPLICON	PCR
ERX4403461	ERR4463090	3	20200320	Illumina NovaSeq 6000	AMPLICON	PCR
ERX4403464	ERR4463093	3	20200320	Illumina NovaSeq 6000	AMPLICON	PCR
ERX4403465	ERR4463094	3	20200320	Illumina NovaSeq 6000	AMPLICON	PCR
ERX4403467	ERR4463096	3	20200320	Illumina NovaSeq 6000	AMPLICON	PCR
ERX4403468	ERR4463097	3	20200320	Illumina NovaSeq 6000	AMPLICON	PCR
ERX4403473	ERR4463102	3	20200320	Illumina NovaSeq 6000	AMPLICON	PCR
ERX4403474	ERR4463103	3	20200320	Illumina NovaSeq 6000	AMPLICON	PCR
ERX4403477	ERR4463106	3	20200320	Illumina NovaSeq 6000	AMPLICON	PCR
ERX4403479	ERR4463108	3	20200320	Illumina NovaSeq 6000	AMPLICON	PCR
ERX4403483	ERR4463112	3	20200320	Illumina NovaSeq 6000	AMPLICON	PCR
ERX4403487	ERR4463116	3	20200320	Illumina NovaSeq 6000	AMPLICON	PCR
ERX4403488	ERR4463117	3	20200320	Illumina NovaSeq 6000	AMPLICON	PCR
ERX4403492	ERR4463121	3	20200320	Illumina NovaSeq 6000	AMPLICON	PCR
ERX4403503	ERR4463132	3	20200320	Illumina NovaSeq 6000	AMPLICON	PCR
ERX4403504	ERR4463133	3	20200320	Illumina NovaSeq 6000	AMPLICON	PCR
ERX4403505	ERR4463134	3	20200320	Illumina NovaSeq 6000	AMPLICON	PCR
ERX4403507	ERR4463136	3	20200320	Illumina NovaSeq 6000	AMPLICON	PCR
ERX4403510	ERR4463139	3	20200320	Illumina NovaSeq 6000	AMPLICON	PCR
ERX4403512	ERR4463141	3	20200320	Illumina NovaSeq 6000	AMPLICON	PCR
ERX4535934	ERR4603787	3	20200320	Illumina NovaSeq 6000	AMPLICON	PCR
ERX4536093	ERR4603946	3	20200320	Illumina NovaSeq 6000	AMPLICON	PCR
ERX4363141	ERR4422583	3	20200321	Illumina NovaSeq 6000	AMPLICON	PCR
ERX4363178	ERR4422620	3	20200321	Illumina NovaSeq 6000	AMPLICON	PCR
ERX4363677	ERR4423119	3	20200321	Illumina NovaSeq 6000	AMPLICON	PCR
ERX4363839	ERR4423281	3	20200321	Illumina NovaSeq 6000	AMPLICON	PCR
ERX4363872	ERR4423314	3	20200321	Illumina NovaSeq 6000	AMPLICON	PCR
ERX4363887	ERR4423329	3	20200321	Illumina NovaSeq 6000	AMPLICON	PCR
ERX4363931	ERR4423373	3	20200321	Illumina NovaSeq 6000	AMPLICON	PCR
ERX4363935	ERR4423377	3	20200321	Illumina NovaSeq 6000	AMPLICON	PCR
ERX4363936	ERR4423378	3	20200321	Illumina NovaSeq 6000	AMPLICON	PCR
ERX4363946	ERR4423388	3	20200321	Illumina NovaSeq 6000	AMPLICON	PCR
ERX4363970	ERR4423412	3	20200321	Illumina NovaSeq 6000	AMPLICON	PCR
ERX4363971	ERR4423413	3	20200321	Illumina NovaSeq 6000	AMPLICON	PCR
ERX4363973	ERR4423415	3	20200321	Illumina NovaSeq 6000	AMPLICON	PCR
ERX4363975	ERR4423417	3	20200321	Illumina NovaSeq 6000	AMPLICON	PCR
ERX4363981	ERR4423423	3	20200321	Illumina NovaSeq 6000	AMPLICON	PCR
ERX4377966	ERR4437463	3	20200321	Illumina NovaSeq 6000	AMPLICON	PCR
ERX4377975	ERR4437472	3	20200321	Illumina NovaSeq 6000	AMPLICON	PCR
ERX4377983	ERR4437480	3	20200321	Illumina NovaSeq 6000	AMPLICON	PCR
ERX4378018	ERR4437515	3	20200321	Illumina NovaSeq 6000	AMPLICON	PCR
ERX4378031	ERR4437528	3	20200321	Illumina NovaSeq 6000	AMPLICON	PCR
ERX4378055	ERR4437552	3	20200321	Illumina NovaSeq 6000	AMPLICON	PCR
ERX4378061	ERR4437558	3	20200321	Illumina NovaSeq 6000	AMPLICON	PCR
ERX4378073	ERR4437570	3	20200321	Illumina NovaSeq 6000	AMPLICON	PCR
ERX4379373	ERR4438870	3	20200321	Illumina NovaSeq 6000	AMPLICON	PCR
ERX4379374	ERR4438871	3	20200321	Illumina NovaSeq 6000	AMPLICON	PCR
ERX4379387	ERR4438884	3	20200321	Illumina NovaSeq 6000	AMPLICON	PCR
ERX4379398	ERR4438895	3	20200321	Illumina NovaSeq 6000	AMPLICON	PCR
ERX4398876	ERR4458505	3	20200321	Illumina NovaSeq 6000	AMPLICON	PCR
ERX4398877	ERR4458506	3	20200321	Illumina NovaSeq 6000	AMPLICON	PCR
ERX4398879	ERR4458508	3	20200321	Illumina NovaSeq 6000	AMPLICON	PCR
ERX4398885	ERR4458514	3	20200321	Illumina NovaSeq 6000	AMPLICON	PCR
ERX4398893	ERR4458522	3	20200321	Illumina NovaSeq 6000	AMPLICON	PCR
ERX4398900	ERR4458529	3	20200321	Illumina NovaSeq 6000	AMPLICON	PCR
ERX4398903	ERR4458532	3	20200321	Illumina NovaSeq 6000	AMPLICON	PCR
ERX4398904	ERR4458533	3	20200321	Illumina NovaSeq 6000	AMPLICON	PCR
ERX4398910	ERR4458539	3	20200321	Illumina NovaSeq 6000	AMPLICON	PCR
ERX4398916	ERR4458545	3	20200321	Illumina NovaSeq 6000	AMPLICON	PCR
ERX4398919	ERR4458548	3	20200321	Illumina NovaSeq 6000	AMPLICON	PCR
ERX4398926	ERR4458555	3	20200321	Illumina NovaSeq 6000	AMPLICON	PCR
ERX4398936	ERR4458565	3	20200321	Illumina NovaSeq 6000	AMPLICON	PCR
ERX4398940	ERR4458569	3	20200321	Illumina NovaSeq 6000	AMPLICON	PCR
ERX4398956	ERR4458585	3	20200321	Illumina NovaSeq 6000	AMPLICON	PCR
ERX4398972	ERR4458601	3	20200321	Illumina NovaSeq 6000	AMPLICON	PCR
ERX4398973	ERR4458602	3	20200321	Illumina NovaSeq 6000	AMPLICON	PCR
ERX4398990	ERR4458619	3	20200321	Illumina NovaSeq 6000	AMPLICON	PCR
ERX4398991	ERR4458620	3	20200321	Illumina NovaSeq 6000	AMPLICON	PCR
ERX4398996	ERR4458625	3	20200321	Illumina NovaSeq 6000	AMPLICON	PCR
ERX4398998	ERR4458627	3	20200321	Illumina NovaSeq 6000	AMPLICON	PCR
ERX4399001	ERR4458630	3	20200321	Illumina NovaSeq 6000	AMPLICON	PCR
ERX4399012	ERR4458641	3	20200321	Illumina NovaSeq 6000	AMPLICON	PCR
ERX4399015	ERR4458644	3	20200321	Illumina NovaSeq 6000	AMPLICON	PCR
ERX4399016	ERR4458645	3	20200321	Illumina NovaSeq 6000	AMPLICON	PCR
ERX4399021	ERR4458650	3	20200321	Illumina NovaSeq 6000	AMPLICON	PCR
ERX4399027	ERR4458656	3	20200321	Illumina NovaSeq 6000	AMPLICON	PCR
ERX4399031	ERR4458660	3	20200321	Illumina NovaSeq 6000	AMPLICON	PCR
ERX4399035	ERR4458664	3	20200321	Illumina NovaSeq 6000	AMPLICON	PCR
ERX4399048	ERR4458677	3	20200321	Illumina NovaSeq 6000	AMPLICON	PCR
ERX4399049	ERR4458678	3	20200321	Illumina NovaSeq 6000	AMPLICON	PCR
ERX4399050	ERR4458679	3	20200321	Illumina NovaSeq 6000	AMPLICON	PCR
ERX4399056	ERR4458685	3	20200321	Illumina NovaSeq 6000	AMPLICON	PCR
ERX4399063	ERR4458692	3	20200321	Illumina NovaSeq 6000	AMPLICON	PCR
ERX4399070	ERR4458699	3	20200321	Illumina NovaSeq 6000	AMPLICON	PCR
ERX4399083	ERR4458712	3	20200321	Illumina NovaSeq 6000	AMPLICON	PCR
ERX4399084	ERR4458713	3	20200321	Illumina NovaSeq 6000	AMPLICON	PCR
ERX4399087	ERR4458716	3	20200321	Illumina NovaSeq 6000	AMPLICON	PCR
ERX4399088	ERR4458717	3	20200321	Illumina NovaSeq 6000	AMPLICON	PCR
ERX4399091	ERR4458720	3	20200321	Illumina NovaSeq 6000	AMPLICON	PCR
ERX4399106	ERR4458735	3	20200321	Illumina NovaSeq 6000	AMPLICON	PCR
ERX4399115	ERR4458744	3	20200321	Illumina NovaSeq 6000	AMPLICON	PCR
ERX4399126	ERR4458755	3	20200321	Illumina NovaSeq 6000	AMPLICON	PCR
ERX4399127	ERR4458756	3	20200321	Illumina NovaSeq 6000	AMPLICON	PCR
ERX4399129	ERR4458758	3	20200321	Illumina NovaSeq 6000	AMPLICON	PCR
ERX4399138	ERR4458767	3	20200321	Illumina NovaSeq 6000	AMPLICON	PCR
ERX4399139	ERR4458768	3	20200321	Illumina NovaSeq 6000	AMPLICON	PCR
ERX4399141	ERR4458770	3	20200321	Illumina NovaSeq 6000	AMPLICON	PCR
ERX4399146	ERR4458775	3	20200321	Illumina NovaSeq 6000	AMPLICON	PCR
ERX4399147	ERR4458776	3	20200321	Illumina NovaSeq 6000	AMPLICON	PCR
ERX4399165	ERR4458794	3	20200321	Illumina NovaSeq 6000	AMPLICON	PCR
ERX4399171	ERR4458800	3	20200321	Illumina NovaSeq 6000	AMPLICON	PCR
ERX4399173	ERR4458802	3	20200321	Illumina NovaSeq 6000	AMPLICON	PCR
ERX4399195	ERR4458824	3	20200321	Illumina NovaSeq 6000	AMPLICON	PCR
ERX4399196	ERR4458825	3	20200321	Illumina NovaSeq 6000	AMPLICON	PCR
ERX4399204	ERR4458833	3	20200321	Illumina NovaSeq 6000	AMPLICON	PCR
ERX4399212	ERR4458841	3	20200321	Illumina NovaSeq 6000	AMPLICON	PCR
ERX4399238	ERR4458867	3	20200321	Illumina NovaSeq 6000	AMPLICON	PCR
ERX4399290	ERR4458919	3	20200321	Illumina NovaSeq 6000	AMPLICON	PCR
ERX4399436	ERR4459065	3	20200321	Illumina NovaSeq 6000	AMPLICON	PCR
ERX4402368	ERR4461997	3	20200321	Illumina NovaSeq 6000	AMPLICON	PCR
ERX4402492	ERR4462121	3	20200321	Illumina NovaSeq 6000	AMPLICON	PCR
ERX4402575	ERR4462204	3	20200321	Illumina NovaSeq 6000	AMPLICON	PCR
ERX4403501	ERR4463130	3	20200321	Illumina NovaSeq 6000	AMPLICON	PCR
ERX4399175	ERR4458804	3	20200321	Illumina NovaSeq 6000	AMPLICON	PCR
ERX4363991	ERR4423433	3	20200321	Illumina NovaSeq 6000	AMPLICON	PCR
ERX4399305	ERR4458934	3	20200321	Illumina NovaSeq 6000	AMPLICON	PCR
ERX4398941	ERR4458570	3	20200321	Illumina NovaSeq 6000	AMPLICON	PCR
ERX4399078	ERR4458707	3	20200321	Illumina NovaSeq 6000	AMPLICON	PCR
ERX4398980	ERR4458609	3	20200321	Illumina NovaSeq 6000	AMPLICON	PCR
ERX4399167	ERR4458796	3	20200321	Illumina NovaSeq 6000	AMPLICON	PCR
ERX4399090	ERR4458719	3	20200321	Illumina NovaSeq 6000	AMPLICON	PCR
ERX4398979	ERR4458608	3	20200321	Illumina NovaSeq 6000	AMPLICON	PCR
ERX4363119	ERR4422561	3	20200322	Illumina NovaSeq 6000	AMPLICON	PCR
ERX4363648	ERR4423090	3	20200322	Illumina NovaSeq 6000	AMPLICON	PCR
ERX4363905	ERR4423347	3	20200322	Illumina NovaSeq 6000	AMPLICON	PCR
ERX4363917	ERR4423359	3	20200322	Illumina NovaSeq 6000	AMPLICON	PCR
ERX4363972	ERR4423414	3	20200322	Illumina NovaSeq 6000	AMPLICON	PCR
ERX4364779	ERR4424221	3	20200322	Illumina NovaSeq 6000	AMPLICON	PCR
ERX4364808	ERR4424250	3	20200322	Illumina NovaSeq 6000	AMPLICON	PCR
ERX4377961	ERR4437458	3	20200322	Illumina NovaSeq 6000	AMPLICON	PCR
ERX4377963	ERR4437460	3	20200322	Illumina NovaSeq 6000	AMPLICON	PCR
ERX4377968	ERR4437465	3	20200322	Illumina NovaSeq 6000	AMPLICON	PCR
ERX4378014	ERR4437511	3	20200322	Illumina NovaSeq 6000	AMPLICON	PCR
ERX4378029	ERR4437526	3	20200322	Illumina NovaSeq 6000	AMPLICON	PCR
ERX4378038	ERR4437535	3	20200322	Illumina NovaSeq 6000	AMPLICON	PCR
ERX4378057	ERR4437554	3	20200322	Illumina NovaSeq 6000	AMPLICON	PCR
ERX4378072	ERR4437569	3	20200322	Illumina NovaSeq 6000	AMPLICON	PCR
ERX4378081	ERR4437578	3	20200322	Illumina NovaSeq 6000	AMPLICON	PCR
ERX4378084	ERR4437581	3	20200322	Illumina NovaSeq 6000	AMPLICON	PCR
ERX4379385	ERR4438882	3	20200322	Illumina NovaSeq 6000	AMPLICON	PCR
ERX4398865	ERR4458494	3	20200322	Illumina NovaSeq 6000	AMPLICON	PCR
ERX4398866	ERR4458495	3	20200322	Illumina NovaSeq 6000	AMPLICON	PCR
ERX4398871	ERR4458500	3	20200322	Illumina NovaSeq 6000	AMPLICON	PCR
ERX4398883	ERR4458512	3	20200322	Illumina NovaSeq 6000	AMPLICON	PCR
ERX4398886	ERR4458515	3	20200322	Illumina NovaSeq 6000	AMPLICON	PCR
ERX4398895	ERR4458524	3	20200322	Illumina NovaSeq 6000	AMPLICON	PCR
ERX4398897	ERR4458526	3	20200322	Illumina NovaSeq 6000	AMPLICON	PCR
ERX4398905	ERR4458534	3	20200322	Illumina NovaSeq 6000	AMPLICON	PCR
ERX4398915	ERR4458544	3	20200322	Illumina NovaSeq 6000	AMPLICON	PCR
ERX4398917	ERR4458546	3	20200322	Illumina NovaSeq 6000	AMPLICON	PCR
ERX4398921	ERR4458550	3	20200322	Illumina NovaSeq 6000	AMPLICON	PCR
ERX4398928	ERR4458557	3	20200322	Illumina NovaSeq 6000	AMPLICON	PCR
ERX4398935	ERR4458564	3	20200322	Illumina NovaSeq 6000	AMPLICON	PCR
ERX4398942	ERR4458571	3	20200322	Illumina NovaSeq 6000	AMPLICON	PCR
ERX4398950	ERR4458579	3	20200322	Illumina NovaSeq 6000	AMPLICON	PCR
ERX4398964	ERR4458593	3	20200322	Illumina NovaSeq 6000	AMPLICON	PCR
ERX4398992	ERR4458621	3	20200322	Illumina NovaSeq 6000	AMPLICON	PCR
ERX4398993	ERR4458622	3	20200322	Illumina NovaSeq 6000	AMPLICON	PCR
ERX4398994	ERR4458623	3	20200322	Illumina NovaSeq 6000	AMPLICON	PCR
ERX4398999	ERR4458628	3	20200322	Illumina NovaSeq 6000	AMPLICON	PCR
ERX4399005	ERR4458634	3	20200322	Illumina NovaSeq 6000	AMPLICON	PCR
ERX4399013	ERR4458642	3	20200322	Illumina NovaSeq 6000	AMPLICON	PCR
ERX4399014	ERR4458643	3	20200322	Illumina NovaSeq 6000	AMPLICON	PCR
ERX4399040	ERR4458669	3	20200322	Illumina NovaSeq 6000	AMPLICON	PCR
ERX4399044	ERR4458673	3	20200322	Illumina NovaSeq 6000	AMPLICON	PCR
ERX4399045	ERR4458674	3	20200322	Illumina NovaSeq 6000	AMPLICON	PCR
ERX4399046	ERR4458675	3	20200322	Illumina NovaSeq 6000	AMPLICON	PCR
ERX4399047	ERR4458676	3	20200322	Illumina NovaSeq 6000	AMPLICON	PCR
ERX4399058	ERR4458687	3	20200322	Illumina NovaSeq 6000	AMPLICON	PCR
ERX4399065	ERR4458694	3	20200322	Illumina NovaSeq 6000	AMPLICON	PCR
ERX4399068	ERR4458697	3	20200322	Illumina NovaSeq 6000	AMPLICON	PCR
ERX4399073	ERR4458702	3	20200322	Illumina NovaSeq 6000	AMPLICON	PCR
ERX4399077	ERR4458706	3	20200322	Illumina NovaSeq 6000	AMPLICON	PCR
ERX4399079	ERR4458708	3	20200322	Illumina NovaSeq 6000	AMPLICON	PCR
ERX4399082	ERR4458711	3	20200322	Illumina NovaSeq 6000	AMPLICON	PCR
ERX4399085	ERR4458714	3	20200322	Illumina NovaSeq 6000	AMPLICON	PCR
ERX4399093	ERR4458722	3	20200322	Illumina NovaSeq 6000	AMPLICON	PCR
ERX4399101	ERR4458730	3	20200322	Illumina NovaSeq 6000	AMPLICON	PCR
ERX4399114	ERR4458743	3	20200322	Illumina NovaSeq 6000	AMPLICON	PCR
ERX4399131	ERR4458760	3	20200322	Illumina NovaSeq 6000	AMPLICON	PCR
ERX4399132	ERR4458761	3	20200322	Illumina NovaSeq 6000	AMPLICON	PCR
ERX4399133	ERR4458762	3	20200322	Illumina NovaSeq 6000	AMPLICON	PCR
ERX4399134	ERR4458763	3	20200322	Illumina NovaSeq 6000	AMPLICON	PCR
ERX4399135	ERR4458764	3	20200322	Illumina NovaSeq 6000	AMPLICON	PCR
ERX4399137	ERR4458766	3	20200322	Illumina NovaSeq 6000	AMPLICON	PCR
ERX4399149	ERR4458778	3	20200322	Illumina NovaSeq 6000	AMPLICON	PCR
ERX4399164	ERR4458793	3	20200322	Illumina NovaSeq 6000	AMPLICON	PCR
ERX4399170	ERR4458799	3	20200322	Illumina NovaSeq 6000	AMPLICON	PCR
ERX4399178	ERR4458807	3	20200322	Illumina NovaSeq 6000	AMPLICON	PCR
ERX4399186	ERR4458815	3	20200322	Illumina NovaSeq 6000	AMPLICON	PCR
ERX4399188	ERR4458817	3	20200322	Illumina NovaSeq 6000	AMPLICON	PCR
ERX4399203	ERR4458832	3	20200322	Illumina NovaSeq 6000	AMPLICON	PCR
ERX4399205	ERR4458834	3	20200322	Illumina NovaSeq 6000	AMPLICON	PCR
ERX4399214	ERR4458843	3	20200322	Illumina NovaSeq 6000	AMPLICON	PCR
ERX4399273	ERR4458902	3	20200322	Illumina NovaSeq 6000	AMPLICON	PCR
ERX4399284	ERR4458913	3	20200322	Illumina NovaSeq 6000	AMPLICON	PCR
ERX4399296	ERR4458925	3	20200322	Illumina NovaSeq 6000	AMPLICON	PCR
ERX4399329	ERR4458958	3	20200322	Illumina NovaSeq 6000	AMPLICON	PCR
ERX4399357	ERR4458986	3	20200322	Illumina NovaSeq 6000	AMPLICON	PCR
ERX4399412	ERR4459041	3	20200322	Illumina NovaSeq 6000	AMPLICON	PCR
ERX4399439	ERR4459068	3	20200322	Illumina NovaSeq 6000	AMPLICON	PCR
ERX4402350	ERR4461979	3	20200322	Illumina NovaSeq 6000	AMPLICON	PCR
ERX4402355	ERR4461984	3	20200322	Illumina NovaSeq 6000	AMPLICON	PCR
ERX4402872	ERR4462501	3	20200322	Illumina NovaSeq 6000	AMPLICON	PCR
ERX4402914	ERR4462543	3	20200322	Illumina NovaSeq 6000	AMPLICON	PCR
ERX4402952	ERR4462581	3	20200322	Illumina NovaSeq 6000	AMPLICON	PCR
ERX4535928	ERR4603781	3	20200322	Illumina NovaSeq 6000	AMPLICON	PCR
ERX4535954	ERR4603807	3	20200322	Illumina NovaSeq 6000	AMPLICON	PCR
ERX4536218	ERR4604071	3	20200322	Illumina NovaSeq 6000	AMPLICON	PCR
ERX4399052	ERR4458681	3	20200322	Illumina NovaSeq 6000	AMPLICON	PCR
ERX4398907	ERR4458536	3	20200322	Illumina NovaSeq 6000	AMPLICON	PCR
ERX4398913	ERR4458542	3	20200322	Illumina NovaSeq 6000	AMPLICON	PCR
ERX4399207	ERR4458836	3	20200322	Illumina NovaSeq 6000	AMPLICON	PCR
ERX4536308	ERR4604161	3	20200322	Illumina NovaSeq 6000	AMPLICON	PCR
ERX4399117	ERR4458746	3	20200322	Illumina NovaSeq 6000	AMPLICON	PCR
ERX4363825	ERR4423267	3	20200322	Illumina NovaSeq 6000	AMPLICON	PCR
ERX4399142	ERR4458771	3	20200322	Illumina NovaSeq 6000	AMPLICON	PCR
ERX4378085	ERR4437582	3	20200322	Illumina NovaSeq 6000	AMPLICON	PCR
ERX4363984	ERR4423426	3	20200322	Illumina NovaSeq 6000	AMPLICON	PCR
ERX4378051	ERR4437548	3	20200322	Illumina NovaSeq 6000	AMPLICON	PCR
ERX4398918	ERR4458547	3	20200322	Illumina NovaSeq 6000	AMPLICON	PCR
ERX4399029	ERR4458658	3	20200322	Illumina NovaSeq 6000	AMPLICON	PCR
ERX4363668	ERR4423110	3	20200323	Illumina NovaSeq 6000	AMPLICON	PCR
ERX4363859	ERR4423301	3	20200323	Illumina NovaSeq 6000	AMPLICON	PCR
ERX4363911	ERR4423353	3	20200323	Illumina NovaSeq 6000	AMPLICON	PCR
ERX4363949	ERR4423391	3	20200323	Illumina NovaSeq 6000	AMPLICON	PCR
ERX4363961	ERR4423403	3	20200323	Illumina NovaSeq 6000	AMPLICON	PCR
ERX4364672	ERR4424114	3	20200323	Illumina NovaSeq 6000	AMPLICON	PCR
ERX4364689	ERR4424131	3	20200323	Illumina NovaSeq 6000	AMPLICON	PCR
ERX4364867	ERR4424309	3	20200323	Illumina NovaSeq 6000	AMPLICON	PCR
ERX4365122	ERR4424564	3	20200323	Illumina NovaSeq 6000	AMPLICON	PCR
ERX4365213	ERR4424655	3	20200323	Illumina NovaSeq 6000	AMPLICON	PCR
ERX4365327	ERR4424769	3	20200323	Illumina NovaSeq 6000	AMPLICON	PCR
ERX4377974	ERR4437471	3	20200323	Illumina NovaSeq 6000	AMPLICON	PCR
ERX4377988	ERR4437485	3	20200323	Illumina NovaSeq 6000	AMPLICON	PCR
ERX4378000	ERR4437497	3	20200323	Illumina NovaSeq 6000	AMPLICON	PCR
ERX4378039	ERR4437536	3	20200323	Illumina NovaSeq 6000	AMPLICON	PCR
ERX4378043	ERR4437540	3	20200323	Illumina NovaSeq 6000	AMPLICON	PCR
ERX4378071	ERR4437568	3	20200323	Illumina NovaSeq 6000	AMPLICON	PCR
ERX4378078	ERR4437575	3	20200323	Illumina NovaSeq 6000	AMPLICON	PCR
ERX4379351	ERR4438848	3	20200323	Illumina NovaSeq 6000	AMPLICON	PCR
ERX4379362	ERR4438859	3	20200323	Illumina NovaSeq 6000	AMPLICON	PCR
ERX4379372	ERR4438869	3	20200323	Illumina NovaSeq 6000	AMPLICON	PCR
ERX4379377	ERR4438874	3	20200323	Illumina NovaSeq 6000	AMPLICON	PCR
ERX4379379	ERR4438876	3	20200323	Illumina NovaSeq 6000	AMPLICON	PCR
ERX4379413	ERR4438910	3	20200323	Illumina NovaSeq 6000	AMPLICON	PCR
ERX4398912	ERR4458541	3	20200323	Illumina NovaSeq 6000	AMPLICON	PCR
ERX4398970	ERR4458599	3	20200323	Illumina NovaSeq 6000	AMPLICON	PCR
ERX4399002	ERR4458631	3	20200323	Illumina NovaSeq 6000	AMPLICON	PCR
ERX4399004	ERR4458633	3	20200323	Illumina NovaSeq 6000	AMPLICON	PCR
ERX4399024	ERR4458653	3	20200323	Illumina NovaSeq 6000	AMPLICON	PCR
ERX4399030	ERR4458659	3	20200323	Illumina NovaSeq 6000	AMPLICON	PCR
ERX4399037	ERR4458666	3	20200323	Illumina NovaSeq 6000	AMPLICON	PCR
ERX4399039	ERR4458668	3	20200323	Illumina NovaSeq 6000	AMPLICON	PCR
ERX4399041	ERR4458670	3	20200323	Illumina NovaSeq 6000	AMPLICON	PCR
ERX4399054	ERR4458683	3	20200323	Illumina NovaSeq 6000	AMPLICON	PCR
ERX4399061	ERR4458690	3	20200323	Illumina NovaSeq 6000	AMPLICON	PCR
ERX4399140	ERR4458769	3	20200323	Illumina NovaSeq 6000	AMPLICON	PCR
ERX4399161	ERR4458790	3	20200323	Illumina NovaSeq 6000	AMPLICON	PCR
ERX4399163	ERR4458792	3	20200323	Illumina NovaSeq 6000	AMPLICON	PCR
ERX4399168	ERR4458797	3	20200323	Illumina NovaSeq 6000	AMPLICON	PCR
ERX4399210	ERR4458839	3	20200323	Illumina NovaSeq 6000	AMPLICON	PCR
ERX4399215	ERR4458844	3	20200323	Illumina NovaSeq 6000	AMPLICON	PCR
ERX4399217	ERR4458846	3	20200323	Illumina NovaSeq 6000	AMPLICON	PCR
ERX4399227	ERR4458856	3	20200323	Illumina NovaSeq 6000	AMPLICON	PCR
ERX4399256	ERR4458885	3	20200323	Illumina NovaSeq 6000	AMPLICON	PCR
ERX4399263	ERR4458892	3	20200323	Illumina NovaSeq 6000	AMPLICON	PCR
ERX4399324	ERR4458953	3	20200323	Illumina NovaSeq 6000	AMPLICON	PCR
ERX4399331	ERR4458960	3	20200323	Illumina NovaSeq 6000	AMPLICON	PCR
ERX4399334	ERR4458963	3	20200323	Illumina NovaSeq 6000	AMPLICON	PCR
ERX4399360	ERR4458989	3	20200323	Illumina NovaSeq 6000	AMPLICON	PCR
ERX4399370	ERR4458999	3	20200323	Illumina NovaSeq 6000	AMPLICON	PCR
ERX4399372	ERR4459001	3	20200323	Illumina NovaSeq 6000	AMPLICON	PCR
ERX4399379	ERR4459008	3	20200323	Illumina NovaSeq 6000	AMPLICON	PCR
ERX4399390	ERR4459019	3	20200323	Illumina NovaSeq 6000	AMPLICON	PCR
ERX4399392	ERR4459021	3	20200323	Illumina NovaSeq 6000	AMPLICON	PCR
ERX4399404	ERR4459033	3	20200323	Illumina NovaSeq 6000	AMPLICON	PCR
ERX4399410	ERR4459039	3	20200323	Illumina NovaSeq 6000	AMPLICON	PCR
ERX4399411	ERR4459040	3	20200323	Illumina NovaSeq 6000	AMPLICON	PCR
ERX4399425	ERR4459054	3	20200323	Illumina NovaSeq 6000	AMPLICON	PCR
ERX4399428	ERR4459057	3	20200323	Illumina NovaSeq 6000	AMPLICON	PCR
ERX4399437	ERR4459066	3	20200323	Illumina NovaSeq 6000	AMPLICON	PCR
ERX4399443	ERR4459072	3	20200323	Illumina NovaSeq 6000	AMPLICON	PCR
ERX4399446	ERR4459075	3	20200323	Illumina NovaSeq 6000	AMPLICON	PCR
ERX4402348	ERR4461977	3	20200323	Illumina NovaSeq 6000	AMPLICON	PCR
ERX4402358	ERR4461987	3	20200323	Illumina NovaSeq 6000	AMPLICON	PCR
ERX4402366	ERR4461995	3	20200323	Illumina NovaSeq 6000	AMPLICON	PCR
ERX4402369	ERR4461998	3	20200323	Illumina NovaSeq 6000	AMPLICON	PCR
ERX4402376	ERR4462005	3	20200323	Illumina NovaSeq 6000	AMPLICON	PCR
ERX4402388	ERR4462017	3	20200323	Illumina NovaSeq 6000	AMPLICON	PCR
ERX4402390	ERR4462019	3	20200323	Illumina NovaSeq 6000	AMPLICON	PCR
ERX4402400	ERR4462029	3	20200323	Illumina NovaSeq 6000	AMPLICON	PCR
ERX4402402	ERR4462031	3	20200323	Illumina NovaSeq 6000	AMPLICON	PCR
ERX4402418	ERR4462047	3	20200323	Illumina NovaSeq 6000	AMPLICON	PCR
ERX4402444	ERR4462073	3	20200323	Illumina NovaSeq 6000	AMPLICON	PCR
ERX4402467	ERR4462096	3	20200323	Illumina NovaSeq 6000	AMPLICON	PCR
ERX4402470	ERR4462099	3	20200323	Illumina NovaSeq 6000	AMPLICON	PCR
ERX4402499	ERR4462128	3	20200323	Illumina NovaSeq 6000	AMPLICON	PCR
ERX4402512	ERR4462141	3	20200323	Illumina NovaSeq 6000	AMPLICON	PCR
ERX4402516	ERR4462145	3	20200323	Illumina NovaSeq 6000	AMPLICON	PCR
ERX4402536	ERR4462165	3	20200323	Illumina NovaSeq 6000	AMPLICON	PCR
ERX4402543	ERR4462172	3	20200323	Illumina NovaSeq 6000	AMPLICON	PCR
ERX4402566	ERR4462195	3	20200323	Illumina NovaSeq 6000	AMPLICON	PCR
ERX4402883	ERR4462512	3	20200323	Illumina NovaSeq 6000	AMPLICON	PCR
ERX4402925	ERR4462554	3	20200323	Illumina NovaSeq 6000	AMPLICON	PCR
ERX4402987	ERR4462616	3	20200323	Illumina NovaSeq 6000	AMPLICON	PCR
ERX4536069	ERR4603922	3	20200323	Illumina NovaSeq 6000	AMPLICON	PCR
ERX4536328	ERR4604181	3	20200323	Illumina NovaSeq 6000	AMPLICON	PCR
ERX4379408	ERR4438905	3	20200323	Illumina NovaSeq 6000	AMPLICON	PCR
ERX4364856	ERR4424298	3	20200323	Illumina NovaSeq 6000	AMPLICON	PCR
ERX4535858	ERR4603711	3	20200323	Illumina NovaSeq 6000	AMPLICON	PCR
ERX4378034	ERR4437531	3	20200323	Illumina NovaSeq 6000	AMPLICON	PCR
ERX4379426	ERR4438923	3	20200323	Illumina NovaSeq 6000	AMPLICON	PCR
ERX4378063	ERR4437560	3	20200323	Illumina NovaSeq 6000	AMPLICON	PCR
ERX4402391	ERR4462020	3	20200323	Illumina NovaSeq 6000	AMPLICON	PCR
ERX4399159	ERR4458788	3	20200323	Illumina NovaSeq 6000	AMPLICON	PCR
ERX4402494	ERR4462123	3	20200323	Illumina NovaSeq 6000	AMPLICON	PCR
ERX4398862	ERR4458491	3	20200323	Illumina NovaSeq 6000	AMPLICON	PCR
ERX4402354	ERR4461983	3	20200323	Illumina NovaSeq 6000	AMPLICON	PCR
ERX4399226	ERR4458855	3	20200323	Illumina NovaSeq 6000	AMPLICON	PCR
ERX4399181	ERR4458810	3	20200323	Illumina NovaSeq 6000	AMPLICON	PCR
ERX4402481	ERR4462110	3	20200323	Illumina NovaSeq 6000	AMPLICON	PCR
ERX4363769	ERR4423211	3	20200324	Illumina NovaSeq 6000	AMPLICON	PCR
ERX4363840	ERR4423282	3	20200324	Illumina NovaSeq 6000	AMPLICON	PCR
ERX4363883	ERR4423325	3	20200324	Illumina NovaSeq 6000	AMPLICON	PCR
ERX4364364	ERR4423806	3	20200324	Illumina NovaSeq 6000	AMPLICON	PCR
ERX4364740	ERR4424182	3	20200324	Illumina NovaSeq 6000	AMPLICON	PCR
ERX4364866	ERR4424308	3	20200324	Illumina NovaSeq 6000	AMPLICON	PCR
ERX4365115	ERR4424557	3	20200324	Illumina NovaSeq 6000	AMPLICON	PCR
ERX4365261	ERR4424703	3	20200324	Illumina NovaSeq 6000	AMPLICON	PCR
ERX4379354	ERR4438851	3	20200324	Illumina NovaSeq 6000	AMPLICON	PCR
ERX4379365	ERR4438862	3	20200324	Illumina NovaSeq 6000	AMPLICON	PCR
ERX4379381	ERR4438878	3	20200324	Illumina NovaSeq 6000	AMPLICON	PCR
ERX4379389	ERR4438886	3	20200324	Illumina NovaSeq 6000	AMPLICON	PCR
ERX4379391	ERR4438888	3	20200324	Illumina NovaSeq 6000	AMPLICON	PCR
ERX4379393	ERR4438890	3	20200324	Illumina NovaSeq 6000	AMPLICON	PCR
ERX4379395	ERR4438892	3	20200324	Illumina NovaSeq 6000	AMPLICON	PCR
ERX4379396	ERR4438893	3	20200324	Illumina NovaSeq 6000	AMPLICON	PCR
ERX4379404	ERR4438901	3	20200324	Illumina NovaSeq 6000	AMPLICON	PCR
ERX4379417	ERR4438914	3	20200324	Illumina NovaSeq 6000	AMPLICON	PCR
ERX4379424	ERR4438921	3	20200324	Illumina NovaSeq 6000	AMPLICON	PCR
ERX4379428	ERR4438925	3	20200324	Illumina NovaSeq 6000	AMPLICON	PCR
ERX4399221	ERR4458850	3	20200324	Illumina NovaSeq 6000	AMPLICON	PCR
ERX4399258	ERR4458887	3	20200324	Illumina NovaSeq 6000	AMPLICON	PCR
ERX4399260	ERR4458889	3	20200324	Illumina NovaSeq 6000	AMPLICON	PCR
ERX4399285	ERR4458914	3	20200324	Illumina NovaSeq 6000	AMPLICON	PCR
ERX4399286	ERR4458915	3	20200324	Illumina NovaSeq 6000	AMPLICON	PCR
ERX4399294	ERR4458923	3	20200324	Illumina NovaSeq 6000	AMPLICON	PCR
ERX4399326	ERR4458955	3	20200324	Illumina NovaSeq 6000	AMPLICON	PCR
ERX4399332	ERR4458961	3	20200324	Illumina NovaSeq 6000	AMPLICON	PCR
ERX4399333	ERR4458962	3	20200324	Illumina NovaSeq 6000	AMPLICON	PCR
ERX4399377	ERR4459006	3	20200324	Illumina NovaSeq 6000	AMPLICON	PCR
ERX4399402	ERR4459031	3	20200324	Illumina NovaSeq 6000	AMPLICON	PCR
ERX4399417	ERR4459046	3	20200324	Illumina NovaSeq 6000	AMPLICON	PCR
ERX4399423	ERR4459052	3	20200324	Illumina NovaSeq 6000	AMPLICON	PCR
ERX4399441	ERR4459070	3	20200324	Illumina NovaSeq 6000	AMPLICON	PCR
ERX4401601	ERR4461230	3	20200324	Illumina NovaSeq 6000	AMPLICON	PCR
ERX4401740	ERR4461369	3	20200324	Illumina NovaSeq 6000	AMPLICON	PCR
ERX4401794	ERR4461423	3	20200324	Illumina NovaSeq 6000	AMPLICON	PCR
ERX4401917	ERR4461546	3	20200324	Illumina NovaSeq 6000	AMPLICON	PCR
ERX4402349	ERR4461978	3	20200324	Illumina NovaSeq 6000	AMPLICON	PCR
ERX4402353	ERR4461982	3	20200324	Illumina NovaSeq 6000	AMPLICON	PCR
ERX4402356	ERR4461985	3	20200324	Illumina NovaSeq 6000	AMPLICON	PCR
ERX4402360	ERR4461989	3	20200324	Illumina NovaSeq 6000	AMPLICON	PCR
ERX4402372	ERR4462001	3	20200324	Illumina NovaSeq 6000	AMPLICON	PCR
ERX4402384	ERR4462013	3	20200324	Illumina NovaSeq 6000	AMPLICON	PCR
ERX4402385	ERR4462014	3	20200324	Illumina NovaSeq 6000	AMPLICON	PCR
ERX4402397	ERR4462026	3	20200324	Illumina NovaSeq 6000	AMPLICON	PCR
ERX4402420	ERR4462049	3	20200324	Illumina NovaSeq 6000	AMPLICON	PCR
ERX4402426	ERR4462055	3	20200324	Illumina NovaSeq 6000	AMPLICON	PCR
ERX4402433	ERR4462062	3	20200324	Illumina NovaSeq 6000	AMPLICON	PCR
ERX4402437	ERR4462066	3	20200324	Illumina NovaSeq 6000	AMPLICON	PCR
ERX4402439	ERR4462068	3	20200324	Illumina NovaSeq 6000	AMPLICON	PCR
ERX4402447	ERR4462076	3	20200324	Illumina NovaSeq 6000	AMPLICON	PCR
ERX4402449	ERR4462078	3	20200324	Illumina NovaSeq 6000	AMPLICON	PCR
ERX4402450	ERR4462079	3	20200324	Illumina NovaSeq 6000	AMPLICON	PCR
ERX4402459	ERR4462088	3	20200324	Illumina NovaSeq 6000	AMPLICON	PCR
ERX4402477	ERR4462106	3	20200324	Illumina NovaSeq 6000	AMPLICON	PCR
ERX4402482	ERR4462111	3	20200324	Illumina NovaSeq 6000	AMPLICON	PCR
ERX4402489	ERR4462118	3	20200324	Illumina NovaSeq 6000	AMPLICON	PCR
ERX4402495	ERR4462124	3	20200324	Illumina NovaSeq 6000	AMPLICON	PCR
ERX4402501	ERR4462130	3	20200324	Illumina NovaSeq 6000	AMPLICON	PCR
ERX4402502	ERR4462131	3	20200324	Illumina NovaSeq 6000	AMPLICON	PCR
ERX4402505	ERR4462134	3	20200324	Illumina NovaSeq 6000	AMPLICON	PCR
ERX4402506	ERR4462135	3	20200324	Illumina NovaSeq 6000	AMPLICON	PCR
ERX4402518	ERR4462147	3	20200324	Illumina NovaSeq 6000	AMPLICON	PCR
ERX4402526	ERR4462155	3	20200324	Illumina NovaSeq 6000	AMPLICON	PCR
ERX4402529	ERR4462158	3	20200324	Illumina NovaSeq 6000	AMPLICON	PCR
ERX4402541	ERR4462170	3	20200324	Illumina NovaSeq 6000	AMPLICON	PCR
ERX4402544	ERR4462173	3	20200324	Illumina NovaSeq 6000	AMPLICON	PCR
ERX4402551	ERR4462180	3	20200324	Illumina NovaSeq 6000	AMPLICON	PCR
ERX4402561	ERR4462190	3	20200324	Illumina NovaSeq 6000	AMPLICON	PCR
ERX4402860	ERR4462489	3	20200324	Illumina NovaSeq 6000	AMPLICON	PCR
ERX4402884	ERR4462513	3	20200324	Illumina NovaSeq 6000	AMPLICON	PCR
ERX4402901	ERR4462530	3	20200324	Illumina NovaSeq 6000	AMPLICON	PCR
ERX4402933	ERR4462562	3	20200324	Illumina NovaSeq 6000	AMPLICON	PCR
ERX4402942	ERR4462571	3	20200324	Illumina NovaSeq 6000	AMPLICON	PCR
ERX4402983	ERR4462612	3	20200324	Illumina NovaSeq 6000	AMPLICON	PCR
ERX4402988	ERR4462617	3	20200324	Illumina NovaSeq 6000	AMPLICON	PCR
ERX4535911	ERR4603764	3	20200324	Illumina NovaSeq 6000	AMPLICON	PCR
ERX4535937	ERR4603790	3	20200324	Illumina NovaSeq 6000	AMPLICON	PCR
ERX4535953	ERR4603806	3	20200324	Illumina NovaSeq 6000	AMPLICON	PCR
ERX4536002	ERR4603855	3	20200324	Illumina NovaSeq 6000	AMPLICON	PCR
ERX4536071	ERR4603924	3	20200324	Illumina NovaSeq 6000	AMPLICON	PCR
ERX4536310	ERR4604163	3	20200324	Illumina NovaSeq 6000	AMPLICON	PCR
ERX4536317	ERR4604170	3	20200324	Illumina NovaSeq 6000	AMPLICON	PCR
ERX4536318	ERR4604171	3	20200324	Illumina NovaSeq 6000	AMPLICON	PCR
ERX4536322	ERR4604175	3	20200324	Illumina NovaSeq 6000	AMPLICON	PCR
ERX4536334	ERR4604187	3	20200324	Illumina NovaSeq 6000	AMPLICON	PCR
ERX4379427	ERR4438924	3	20200324	Illumina NovaSeq 6000	AMPLICON	PCR
ERX4402453	ERR4462082	3	20200324	Illumina NovaSeq 6000	AMPLICON	PCR
ERX4363954	ERR4423396	3	20200324	Illumina NovaSeq 6000	AMPLICON	PCR
ERX4379386	ERR4438883	3	20200324	Illumina NovaSeq 6000	AMPLICON	PCR
ERX4402537	ERR4462166	3	20200324	Illumina NovaSeq 6000	AMPLICON	PCR
ERX4402416	ERR4462045	3	20200324	Illumina NovaSeq 6000	AMPLICON	PCR
ERX4399388	ERR4459017	3	20200324	Illumina NovaSeq 6000	AMPLICON	PCR
ERX4399400	ERR4459029	3	20200324	Illumina NovaSeq 6000	AMPLICON	PCR
ERX4379409	ERR4438906	3	20200324	Illumina NovaSeq 6000	AMPLICON	PCR
ERX4535959	ERR4603812	3	20200324	Illumina NovaSeq 6000	AMPLICON	PCR
ERX4402469	ERR4462098	3	20200324	Illumina NovaSeq 6000	AMPLICON	PCR
ERX4402473	ERR4462102	3	20200324	Illumina NovaSeq 6000	AMPLICON	PCR
ERX4363136	ERR4422578	3	20200324	Illumina NovaSeq 6000	AMPLICON	PCR
ERX4363629	ERR4423071	3	20200325	Illumina NovaSeq 6000	AMPLICON	PCR
ERX4363636	ERR4423078	3	20200325	Illumina NovaSeq 6000	AMPLICON	PCR
ERX4363641	ERR4423083	3	20200325	Illumina NovaSeq 6000	AMPLICON	PCR
ERX4363676	ERR4423118	3	20200325	Illumina NovaSeq 6000	AMPLICON	PCR
ERX4363694	ERR4423136	3	20200325	Illumina NovaSeq 6000	AMPLICON	PCR
ERX4363733	ERR4423175	3	20200325	Illumina NovaSeq 6000	AMPLICON	PCR
ERX4363784	ERR4423226	3	20200325	Illumina NovaSeq 6000	AMPLICON	PCR
ERX4363815	ERR4423257	3	20200325	Illumina NovaSeq 6000	AMPLICON	PCR
ERX4363833	ERR4423275	3	20200325	Illumina NovaSeq 6000	AMPLICON	PCR
ERX4363889	ERR4423331	3	20200325	Illumina NovaSeq 6000	AMPLICON	PCR
ERX4364454	ERR4423896	3	20200325	Illumina NovaSeq 6000	AMPLICON	PCR
ERX4364972	ERR4424414	3	20200325	Illumina NovaSeq 6000	AMPLICON	PCR
ERX4377761	ERR4437258	3	20200325	Illumina NovaSeq 6000	AMPLICON	PCR
ERX4377962	ERR4437459	3	20200325	Illumina NovaSeq 6000	AMPLICON	PCR
ERX4377967	ERR4437464	3	20200325	Illumina NovaSeq 6000	AMPLICON	PCR
ERX4378035	ERR4437532	3	20200325	Illumina NovaSeq 6000	AMPLICON	PCR
ERX4379356	ERR4438853	3	20200325	Illumina NovaSeq 6000	AMPLICON	PCR
ERX4379364	ERR4438861	3	20200325	Illumina NovaSeq 6000	AMPLICON	PCR
ERX4379368	ERR4438865	3	20200325	Illumina NovaSeq 6000	AMPLICON	PCR
ERX4379399	ERR4438896	3	20200325	Illumina NovaSeq 6000	AMPLICON	PCR
ERX4379407	ERR4438904	3	20200325	Illumina NovaSeq 6000	AMPLICON	PCR
ERX4401579	ERR4461208	3	20200325	Illumina NovaSeq 6000	AMPLICON	PCR
ERX4401611	ERR4461240	3	20200325	Illumina NovaSeq 6000	AMPLICON	PCR
ERX4401625	ERR4461254	3	20200325	Illumina NovaSeq 6000	AMPLICON	PCR
ERX4401627	ERR4461256	3	20200325	Illumina NovaSeq 6000	AMPLICON	PCR
ERX4401630	ERR4461259	3	20200325	Illumina NovaSeq 6000	AMPLICON	PCR
ERX4401633	ERR4461262	3	20200325	Illumina NovaSeq 6000	AMPLICON	PCR
ERX4401636	ERR4461265	3	20200325	Illumina NovaSeq 6000	AMPLICON	PCR
ERX4401637	ERR4461266	3	20200325	Illumina NovaSeq 6000	AMPLICON	PCR
ERX4401654	ERR4461283	3	20200325	Illumina NovaSeq 6000	AMPLICON	PCR
ERX4401670	ERR4461299	3	20200325	Illumina NovaSeq 6000	AMPLICON	PCR
ERX4401692	ERR4461321	3	20200325	Illumina NovaSeq 6000	AMPLICON	PCR
ERX4401707	ERR4461336	3	20200325	Illumina NovaSeq 6000	AMPLICON	PCR
ERX4401712	ERR4461341	3	20200325	Illumina NovaSeq 6000	AMPLICON	PCR
ERX4401729	ERR4461358	3	20200325	Illumina NovaSeq 6000	AMPLICON	PCR
ERX4401732	ERR4461361	3	20200325	Illumina NovaSeq 6000	AMPLICON	PCR
ERX4401736	ERR4461365	3	20200325	Illumina NovaSeq 6000	AMPLICON	PCR
ERX4401787	ERR4461416	3	20200325	Illumina NovaSeq 6000	AMPLICON	PCR
ERX4401797	ERR4461426	3	20200325	Illumina NovaSeq 6000	AMPLICON	PCR
ERX4401812	ERR4461441	3	20200325	Illumina NovaSeq 6000	AMPLICON	PCR
ERX4401821	ERR4461450	3	20200325	Illumina NovaSeq 6000	AMPLICON	PCR
ERX4401843	ERR4461472	3	20200325	Illumina NovaSeq 6000	AMPLICON	PCR
ERX4401853	ERR4461482	3	20200325	Illumina NovaSeq 6000	AMPLICON	PCR
ERX4401855	ERR4461484	3	20200325	Illumina NovaSeq 6000	AMPLICON	PCR
ERX4401915	ERR4461544	3	20200325	Illumina NovaSeq 6000	AMPLICON	PCR
ERX4401922	ERR4461551	3	20200325	Illumina NovaSeq 6000	AMPLICON	PCR
ERX4402377	ERR4462006	3	20200325	Illumina NovaSeq 6000	AMPLICON	PCR
ERX4402380	ERR4462009	3	20200325	Illumina NovaSeq 6000	AMPLICON	PCR
ERX4402387	ERR4462016	3	20200325	Illumina NovaSeq 6000	AMPLICON	PCR
ERX4402393	ERR4462022	3	20200325	Illumina NovaSeq 6000	AMPLICON	PCR
ERX4402410	ERR4462039	3	20200325	Illumina NovaSeq 6000	AMPLICON	PCR
ERX4402412	ERR4462041	3	20200325	Illumina NovaSeq 6000	AMPLICON	PCR
ERX4402415	ERR4462044	3	20200325	Illumina NovaSeq 6000	AMPLICON	PCR
ERX4402421	ERR4462050	3	20200325	Illumina NovaSeq 6000	AMPLICON	PCR
ERX4402427	ERR4462056	3	20200325	Illumina NovaSeq 6000	AMPLICON	PCR
ERX4402430	ERR4462059	3	20200325	Illumina NovaSeq 6000	AMPLICON	PCR
ERX4402434	ERR4462063	3	20200325	Illumina NovaSeq 6000	AMPLICON	PCR
ERX4402435	ERR4462064	3	20200325	Illumina NovaSeq 6000	AMPLICON	PCR
ERX4402436	ERR4462065	3	20200325	Illumina NovaSeq 6000	AMPLICON	PCR
ERX4402452	ERR4462081	3	20200325	Illumina NovaSeq 6000	AMPLICON	PCR
ERX4402454	ERR4462083	3	20200325	Illumina NovaSeq 6000	AMPLICON	PCR
ERX4402456	ERR4462085	3	20200325	Illumina NovaSeq 6000	AMPLICON	PCR
ERX4402471	ERR4462100	3	20200325	Illumina NovaSeq 6000	AMPLICON	PCR
ERX4402472	ERR4462101	3	20200325	Illumina NovaSeq 6000	AMPLICON	PCR
ERX4402478	ERR4462107	3	20200325	Illumina NovaSeq 6000	AMPLICON	PCR
ERX4402486	ERR4462115	3	20200325	Illumina NovaSeq 6000	AMPLICON	PCR
ERX4402487	ERR4462116	3	20200325	Illumina NovaSeq 6000	AMPLICON	PCR
ERX4402507	ERR4462136	3	20200325	Illumina NovaSeq 6000	AMPLICON	PCR
ERX4402508	ERR4462137	3	20200325	Illumina NovaSeq 6000	AMPLICON	PCR
ERX4402509	ERR4462138	3	20200325	Illumina NovaSeq 6000	AMPLICON	PCR
ERX4402510	ERR4462139	3	20200325	Illumina NovaSeq 6000	AMPLICON	PCR
ERX4402511	ERR4462140	3	20200325	Illumina NovaSeq 6000	AMPLICON	PCR
ERX4402522	ERR4462151	3	20200325	Illumina NovaSeq 6000	AMPLICON	PCR
ERX4402531	ERR4462160	3	20200325	Illumina NovaSeq 6000	AMPLICON	PCR
ERX4402553	ERR4462182	3	20200325	Illumina NovaSeq 6000	AMPLICON	PCR
ERX4402557	ERR4462186	3	20200325	Illumina NovaSeq 6000	AMPLICON	PCR
ERX4402558	ERR4462187	3	20200325	Illumina NovaSeq 6000	AMPLICON	PCR
ERX4402573	ERR4462202	3	20200325	Illumina NovaSeq 6000	AMPLICON	PCR
ERX4402578	ERR4462207	3	20200325	Illumina NovaSeq 6000	AMPLICON	PCR
ERX4402936	ERR4462565	3	20200325	Illumina NovaSeq 6000	AMPLICON	PCR
ERX4402967	ERR4462596	3	20200325	Illumina NovaSeq 6000	AMPLICON	PCR
ERX4517190	ERR4581650	3	20200325	Illumina NovaSeq 6000	AMPLICON	PCR
ERX4535915	ERR4603768	3	20200325	Illumina NovaSeq 6000	AMPLICON	PCR
ERX4535927	ERR4603780	3	20200325	Illumina NovaSeq 6000	AMPLICON	PCR
ERX4535936	ERR4603789	3	20200325	Illumina NovaSeq 6000	AMPLICON	PCR
ERX4535963	ERR4603816	3	20200325	Illumina NovaSeq 6000	AMPLICON	PCR
ERX4536307	ERR4604160	3	20200325	Illumina NovaSeq 6000	AMPLICON	PCR
ERX4401781	ERR4461410	3	20200325	Illumina NovaSeq 6000	AMPLICON	PCR
ERX4401916	ERR4461545	3	20200325	Illumina NovaSeq 6000	AMPLICON	PCR
ERX4401709	ERR4461338	3	20200325	Illumina NovaSeq 6000	AMPLICON	PCR
ERX4402517	ERR4462146	3	20200325	Illumina NovaSeq 6000	AMPLICON	PCR
ERX4401647	ERR4461276	3	20200325	Illumina NovaSeq 6000	AMPLICON	PCR
ERX4401901	ERR4461530	3	20200325	Illumina NovaSeq 6000	AMPLICON	PCR
ERX4402455	ERR4462084	3	20200325	Illumina NovaSeq 6000	AMPLICON	PCR
ERX4363897	ERR4423339	3	20200325	Illumina NovaSeq 6000	AMPLICON	PCR
ERX4401634	ERR4461263	3	20200325	Illumina NovaSeq 6000	AMPLICON	PCR
ERX4402357	ERR4461986	3	20200325	Illumina NovaSeq 6000	AMPLICON	PCR
ERX4401848	ERR4461477	3	20200325	Illumina NovaSeq 6000	AMPLICON	PCR
ERX4545099	ERR4616058	3	20200325	Illumina NovaSeq 6000	AMPLICON	PCR
ERX4401612	ERR4461241	3	20200325	Illumina NovaSeq 6000	AMPLICON	PCR
ERX4363101	ERR4422543	3	20200326	Illumina NovaSeq 6000	AMPLICON	PCR
ERX4363139	ERR4422581	3	20200326	Illumina NovaSeq 6000	AMPLICON	PCR
ERX4363669	ERR4423111	3	20200326	Illumina NovaSeq 6000	AMPLICON	PCR
ERX4363683	ERR4423125	3	20200326	Illumina NovaSeq 6000	AMPLICON	PCR
ERX4363686	ERR4423128	3	20200326	Illumina NovaSeq 6000	AMPLICON	PCR
ERX4363752	ERR4423194	3	20200326	Illumina NovaSeq 6000	AMPLICON	PCR
ERX4363767	ERR4423209	3	20200326	Illumina NovaSeq 6000	AMPLICON	PCR
ERX4363822	ERR4423264	3	20200326	Illumina NovaSeq 6000	AMPLICON	PCR
ERX4363828	ERR4423270	3	20200326	Illumina NovaSeq 6000	AMPLICON	PCR
ERX4364428	ERR4423870	3	20200326	Illumina NovaSeq 6000	AMPLICON	PCR
ERX4365317	ERR4424759	3	20200326	Illumina NovaSeq 6000	AMPLICON	PCR
ERX4377760	ERR4437257	3	20200326	Illumina NovaSeq 6000	AMPLICON	PCR
ERX4377973	ERR4437470	3	20200326	Illumina NovaSeq 6000	AMPLICON	PCR
ERX4377990	ERR4437487	3	20200326	Illumina NovaSeq 6000	AMPLICON	PCR
ERX4378015	ERR4437512	3	20200326	Illumina NovaSeq 6000	AMPLICON	PCR
ERX4378020	ERR4437517	3	20200326	Illumina NovaSeq 6000	AMPLICON	PCR
ERX4378024	ERR4437521	3	20200326	Illumina NovaSeq 6000	AMPLICON	PCR
ERX4378096	ERR4437593	3	20200326	Illumina NovaSeq 6000	AMPLICON	PCR
ERX4378683	ERR4438180	3	20200326	Illumina NovaSeq 6000	AMPLICON	PCR
ERX4378833	ERR4438330	3	20200326	Illumina NovaSeq 6000	AMPLICON	PCR
ERX4379352	ERR4438849	3	20200326	Illumina NovaSeq 6000	AMPLICON	PCR
ERX4379400	ERR4438897	3	20200326	Illumina NovaSeq 6000	AMPLICON	PCR
ERX4400465	ERR4460094	3	20200326	Illumina NovaSeq 6000	AMPLICON	PCR
ERX4400500	ERR4460129	3	20200326	Illumina NovaSeq 6000	AMPLICON	PCR
ERX4400515	ERR4460144	3	20200326	Illumina NovaSeq 6000	AMPLICON	PCR
ERX4400519	ERR4460148	3	20200326	Illumina NovaSeq 6000	AMPLICON	PCR
ERX4400525	ERR4460154	3	20200326	Illumina NovaSeq 6000	AMPLICON	PCR
ERX4400530	ERR4460159	3	20200326	Illumina NovaSeq 6000	AMPLICON	PCR
ERX4401587	ERR4461216	3	20200326	Illumina NovaSeq 6000	AMPLICON	PCR
ERX4401596	ERR4461225	3	20200326	Illumina NovaSeq 6000	AMPLICON	PCR
ERX4401613	ERR4461242	3	20200326	Illumina NovaSeq 6000	AMPLICON	PCR
ERX4401657	ERR4461286	3	20200326	Illumina NovaSeq 6000	AMPLICON	PCR
ERX4401665	ERR4461294	3	20200326	Illumina NovaSeq 6000	AMPLICON	PCR
ERX4401688	ERR4461317	3	20200326	Illumina NovaSeq 6000	AMPLICON	PCR
ERX4401700	ERR4461329	3	20200326	Illumina NovaSeq 6000	AMPLICON	PCR
ERX4401705	ERR4461334	3	20200326	Illumina NovaSeq 6000	AMPLICON	PCR
ERX4401711	ERR4461340	3	20200326	Illumina NovaSeq 6000	AMPLICON	PCR
ERX4401742	ERR4461371	3	20200326	Illumina NovaSeq 6000	AMPLICON	PCR
ERX4401751	ERR4461380	3	20200326	Illumina NovaSeq 6000	AMPLICON	PCR
ERX4401756	ERR4461385	3	20200326	Illumina NovaSeq 6000	AMPLICON	PCR
ERX4401760	ERR4461389	3	20200326	Illumina NovaSeq 6000	AMPLICON	PCR
ERX4401770	ERR4461399	3	20200326	Illumina NovaSeq 6000	AMPLICON	PCR
ERX4401771	ERR4461400	3	20200326	Illumina NovaSeq 6000	AMPLICON	PCR
ERX4401773	ERR4461402	3	20200326	Illumina NovaSeq 6000	AMPLICON	PCR
ERX4401802	ERR4461431	3	20200326	Illumina NovaSeq 6000	AMPLICON	PCR
ERX4401806	ERR4461435	3	20200326	Illumina NovaSeq 6000	AMPLICON	PCR
ERX4401817	ERR4461446	3	20200326	Illumina NovaSeq 6000	AMPLICON	PCR
ERX4401828	ERR4461457	3	20200326	Illumina NovaSeq 6000	AMPLICON	PCR
ERX4401847	ERR4461476	3	20200326	Illumina NovaSeq 6000	AMPLICON	PCR
ERX4401849	ERR4461478	3	20200326	Illumina NovaSeq 6000	AMPLICON	PCR
ERX4401857	ERR4461486	3	20200326	Illumina NovaSeq 6000	AMPLICON	PCR
ERX4401861	ERR4461490	3	20200326	Illumina NovaSeq 6000	AMPLICON	PCR
ERX4401862	ERR4461491	3	20200326	Illumina NovaSeq 6000	AMPLICON	PCR
ERX4401864	ERR4461493	3	20200326	Illumina NovaSeq 6000	AMPLICON	PCR
ERX4401870	ERR4461499	3	20200326	Illumina NovaSeq 6000	AMPLICON	PCR
ERX4401882	ERR4461511	3	20200326	Illumina NovaSeq 6000	AMPLICON	PCR
ERX4401888	ERR4461517	3	20200326	Illumina NovaSeq 6000	AMPLICON	PCR
ERX4401894	ERR4461523	3	20200326	Illumina NovaSeq 6000	AMPLICON	PCR
ERX4401896	ERR4461525	3	20200326	Illumina NovaSeq 6000	AMPLICON	PCR
ERX4401903	ERR4461532	3	20200326	Illumina NovaSeq 6000	AMPLICON	PCR
ERX4401907	ERR4461536	3	20200326	Illumina NovaSeq 6000	AMPLICON	PCR
ERX4401908	ERR4461537	3	20200326	Illumina NovaSeq 6000	AMPLICON	PCR
ERX4401919	ERR4461548	3	20200326	Illumina NovaSeq 6000	AMPLICON	PCR
ERX4401926	ERR4461555	3	20200326	Illumina NovaSeq 6000	AMPLICON	PCR
ERX4402389	ERR4462018	3	20200326	Illumina NovaSeq 6000	AMPLICON	PCR
ERX4402396	ERR4462025	3	20200326	Illumina NovaSeq 6000	AMPLICON	PCR
ERX4402408	ERR4462037	3	20200326	Illumina NovaSeq 6000	AMPLICON	PCR
ERX4402475	ERR4462104	3	20200326	Illumina NovaSeq 6000	AMPLICON	PCR
ERX4402498	ERR4462127	3	20200326	Illumina NovaSeq 6000	AMPLICON	PCR
ERX4402514	ERR4462143	3	20200326	Illumina NovaSeq 6000	AMPLICON	PCR
ERX4402521	ERR4462150	3	20200326	Illumina NovaSeq 6000	AMPLICON	PCR
ERX4402524	ERR4462153	3	20200326	Illumina NovaSeq 6000	AMPLICON	PCR
ERX4402530	ERR4462159	3	20200326	Illumina NovaSeq 6000	AMPLICON	PCR
ERX4402542	ERR4462171	3	20200326	Illumina NovaSeq 6000	AMPLICON	PCR
ERX4402562	ERR4462191	3	20200326	Illumina NovaSeq 6000	AMPLICON	PCR
ERX4402570	ERR4462199	3	20200326	Illumina NovaSeq 6000	AMPLICON	PCR
ERX4402572	ERR4462201	3	20200326	Illumina NovaSeq 6000	AMPLICON	PCR
ERX4402576	ERR4462205	3	20200326	Illumina NovaSeq 6000	AMPLICON	PCR
ERX4402903	ERR4462532	3	20200326	Illumina NovaSeq 6000	AMPLICON	PCR
ERX4402919	ERR4462548	3	20200326	Illumina NovaSeq 6000	AMPLICON	PCR
ERX4402934	ERR4462563	3	20200326	Illumina NovaSeq 6000	AMPLICON	PCR
ERX4402979	ERR4462608	3	20200326	Illumina NovaSeq 6000	AMPLICON	PCR
ERX4402991	ERR4462620	3	20200326	Illumina NovaSeq 6000	AMPLICON	PCR
ERX4402992	ERR4462621	3	20200326	Illumina NovaSeq 6000	AMPLICON	PCR
ERX4535907	ERR4603760	3	20200326	Illumina NovaSeq 6000	AMPLICON	PCR
ERX4535945	ERR4603798	3	20200326	Illumina NovaSeq 6000	AMPLICON	PCR
ERX4535950	ERR4603803	3	20200326	Illumina NovaSeq 6000	AMPLICON	PCR
ERX4536273	ERR4604126	3	20200326	Illumina NovaSeq 6000	AMPLICON	PCR
ERX4536276	ERR4604129	3	20200326	Illumina NovaSeq 6000	AMPLICON	PCR
ERX4536288	ERR4604141	3	20200326	Illumina NovaSeq 6000	AMPLICON	PCR
ERX4536296	ERR4604149	3	20200326	Illumina NovaSeq 6000	AMPLICON	PCR
ERX4401807	ERR4461436	3	20200326	Illumina NovaSeq 6000	AMPLICON	PCR
ERX4401799	ERR4461428	3	20200326	Illumina NovaSeq 6000	AMPLICON	PCR
ERX4363737	ERR4423179	3	20200326	Illumina NovaSeq 6000	AMPLICON	PCR
ERX4363696	ERR4423138	3	20200326	Illumina NovaSeq 6000	AMPLICON	PCR
ERX4401753	ERR4461382	3	20200326	Illumina NovaSeq 6000	AMPLICON	PCR
ERX4377996	ERR4437493	3	20200326	Illumina NovaSeq 6000	AMPLICON	PCR
ERX4400513	ERR4460142	3	20200326	Illumina NovaSeq 6000	AMPLICON	PCR
ERX4401745	ERR4461374	3	20200326	Illumina NovaSeq 6000	AMPLICON	PCR
ERX4402888	ERR4462517	3	20200326	Illumina NovaSeq 6000	AMPLICON	PCR
ERX4363637	ERR4423079	3	20200327	Illumina NovaSeq 6000	AMPLICON	PCR
ERX4363638	ERR4423080	3	20200327	Illumina NovaSeq 6000	AMPLICON	PCR
ERX4363640	ERR4423082	3	20200327	Illumina NovaSeq 6000	AMPLICON	PCR
ERX4363653	ERR4423095	3	20200327	Illumina NovaSeq 6000	AMPLICON	PCR
ERX4363710	ERR4423152	3	20200327	Illumina NovaSeq 6000	AMPLICON	PCR
ERX4363729	ERR4423171	3	20200327	Illumina NovaSeq 6000	AMPLICON	PCR
ERX4363731	ERR4423173	3	20200327	Illumina NovaSeq 6000	AMPLICON	PCR
ERX4363732	ERR4423174	3	20200327	Illumina NovaSeq 6000	AMPLICON	PCR
ERX4363734	ERR4423176	3	20200327	Illumina NovaSeq 6000	AMPLICON	PCR
ERX4363743	ERR4423185	3	20200327	Illumina NovaSeq 6000	AMPLICON	PCR
ERX4363757	ERR4423199	3	20200327	Illumina NovaSeq 6000	AMPLICON	PCR
ERX4363802	ERR4423244	3	20200327	Illumina NovaSeq 6000	AMPLICON	PCR
ERX4363805	ERR4423247	3	20200327	Illumina NovaSeq 6000	AMPLICON	PCR
ERX4363820	ERR4423262	3	20200327	Illumina NovaSeq 6000	AMPLICON	PCR
ERX4363873	ERR4423315	3	20200327	Illumina NovaSeq 6000	AMPLICON	PCR
ERX4364935	ERR4424377	3	20200327	Illumina NovaSeq 6000	AMPLICON	PCR
ERX4365018	ERR4424460	3	20200327	Illumina NovaSeq 6000	AMPLICON	PCR
ERX4365079	ERR4424521	3	20200327	Illumina NovaSeq 6000	AMPLICON	PCR
ERX4365163	ERR4424605	3	20200327	Illumina NovaSeq 6000	AMPLICON	PCR
ERX4365177	ERR4424619	3	20200327	Illumina NovaSeq 6000	AMPLICON	PCR
ERX4365227	ERR4424669	3	20200327	Illumina NovaSeq 6000	AMPLICON	PCR
ERX4377765	ERR4437262	3	20200327	Illumina NovaSeq 6000	AMPLICON	PCR
ERX4377812	ERR4437309	3	20200327	Illumina NovaSeq 6000	AMPLICON	PCR
ERX4377820	ERR4437317	3	20200327	Illumina NovaSeq 6000	AMPLICON	PCR
ERX4377826	ERR4437323	3	20200327	Illumina NovaSeq 6000	AMPLICON	PCR
ERX4377842	ERR4437339	3	20200327	Illumina NovaSeq 6000	AMPLICON	PCR
ERX4377855	ERR4437352	3	20200327	Illumina NovaSeq 6000	AMPLICON	PCR
ERX4377915	ERR4437412	3	20200327	Illumina NovaSeq 6000	AMPLICON	PCR
ERX4377921	ERR4437418	3	20200327	Illumina NovaSeq 6000	AMPLICON	PCR
ERX4377925	ERR4437422	3	20200327	Illumina NovaSeq 6000	AMPLICON	PCR
ERX4377997	ERR4437494	3	20200327	Illumina NovaSeq 6000	AMPLICON	PCR
ERX4377999	ERR4437496	3	20200327	Illumina NovaSeq 6000	AMPLICON	PCR
ERX4378027	ERR4437524	3	20200327	Illumina NovaSeq 6000	AMPLICON	PCR
ERX4378075	ERR4437572	3	20200327	Illumina NovaSeq 6000	AMPLICON	PCR
ERX4378089	ERR4437586	3	20200327	Illumina NovaSeq 6000	AMPLICON	PCR
ERX4378676	ERR4438173	3	20200327	Illumina NovaSeq 6000	AMPLICON	PCR
ERX4378678	ERR4438175	3	20200327	Illumina NovaSeq 6000	AMPLICON	PCR
ERX4378721	ERR4438218	3	20200327	Illumina NovaSeq 6000	AMPLICON	PCR
ERX4378756	ERR4438253	3	20200327	Illumina NovaSeq 6000	AMPLICON	PCR
ERX4378759	ERR4438256	3	20200327	Illumina NovaSeq 6000	AMPLICON	PCR
ERX4378781	ERR4438278	3	20200327	Illumina NovaSeq 6000	AMPLICON	PCR
ERX4399237	ERR4458866	3	20200327	Illumina NovaSeq 6000	AMPLICON	PCR
ERX4399251	ERR4458880	3	20200327	Illumina NovaSeq 6000	AMPLICON	PCR
ERX4400404	ERR4460033	3	20200327	Illumina NovaSeq 6000	AMPLICON	PCR
ERX4400436	ERR4460065	3	20200327	Illumina NovaSeq 6000	AMPLICON	PCR
ERX4400483	ERR4460112	3	20200327	Illumina NovaSeq 6000	AMPLICON	PCR
ERX4401589	ERR4461218	3	20200327	Illumina NovaSeq 6000	AMPLICON	PCR
ERX4401594	ERR4461223	3	20200327	Illumina NovaSeq 6000	AMPLICON	PCR
ERX4401599	ERR4461228	3	20200327	Illumina NovaSeq 6000	AMPLICON	PCR
ERX4401602	ERR4461231	3	20200327	Illumina NovaSeq 6000	AMPLICON	PCR
ERX4401615	ERR4461244	3	20200327	Illumina NovaSeq 6000	AMPLICON	PCR
ERX4401685	ERR4461314	3	20200327	Illumina NovaSeq 6000	AMPLICON	PCR
ERX4401693	ERR4461322	3	20200327	Illumina NovaSeq 6000	AMPLICON	PCR
ERX4401703	ERR4461332	3	20200327	Illumina NovaSeq 6000	AMPLICON	PCR
ERX4401713	ERR4461342	3	20200327	Illumina NovaSeq 6000	AMPLICON	PCR
ERX4401715	ERR4461344	3	20200327	Illumina NovaSeq 6000	AMPLICON	PCR
ERX4401768	ERR4461397	3	20200327	Illumina NovaSeq 6000	AMPLICON	PCR
ERX4401772	ERR4461401	3	20200327	Illumina NovaSeq 6000	AMPLICON	PCR
ERX4401778	ERR4461407	3	20200327	Illumina NovaSeq 6000	AMPLICON	PCR
ERX4401818	ERR4461447	3	20200327	Illumina NovaSeq 6000	AMPLICON	PCR
ERX4401846	ERR4461475	3	20200327	Illumina NovaSeq 6000	AMPLICON	PCR
ERX4401850	ERR4461479	3	20200327	Illumina NovaSeq 6000	AMPLICON	PCR
ERX4401860	ERR4461489	3	20200327	Illumina NovaSeq 6000	AMPLICON	PCR
ERX4401873	ERR4461502	3	20200327	Illumina NovaSeq 6000	AMPLICON	PCR
ERX4401875	ERR4461504	3	20200327	Illumina NovaSeq 6000	AMPLICON	PCR
ERX4401895	ERR4461524	3	20200327	Illumina NovaSeq 6000	AMPLICON	PCR
ERX4401912	ERR4461541	3	20200327	Illumina NovaSeq 6000	AMPLICON	PCR
ERX4401927	ERR4461556	3	20200327	Illumina NovaSeq 6000	AMPLICON	PCR
ERX4402352	ERR4461981	3	20200327	Illumina NovaSeq 6000	AMPLICON	PCR
ERX4402442	ERR4462071	3	20200327	Illumina NovaSeq 6000	AMPLICON	PCR
ERX4402476	ERR4462105	3	20200327	Illumina NovaSeq 6000	AMPLICON	PCR
ERX4402488	ERR4462117	3	20200327	Illumina NovaSeq 6000	AMPLICON	PCR
ERX4402504	ERR4462133	3	20200327	Illumina NovaSeq 6000	AMPLICON	PCR
ERX4402548	ERR4462177	3	20200327	Illumina NovaSeq 6000	AMPLICON	PCR
ERX4402555	ERR4462184	3	20200327	Illumina NovaSeq 6000	AMPLICON	PCR
ERX4402960	ERR4462589	3	20200327	Illumina NovaSeq 6000	AMPLICON	PCR
ERX4402971	ERR4462600	3	20200327	Illumina NovaSeq 6000	AMPLICON	PCR
ERX4402990	ERR4462619	3	20200327	Illumina NovaSeq 6000	AMPLICON	PCR
ERX4517097	ERR4581557	3	20200327	Illumina NovaSeq 6000	AMPLICON	PCR
ERX4535908	ERR4603761	3	20200327	Illumina NovaSeq 6000	AMPLICON	PCR
ERX4535919	ERR4603772	3	20200327	Illumina NovaSeq 6000	AMPLICON	PCR
ERX4535932	ERR4603785	3	20200327	Illumina NovaSeq 6000	AMPLICON	PCR
ERX4536004	ERR4603857	3	20200327	Illumina NovaSeq 6000	AMPLICON	PCR
ERX4536006	ERR4603859	3	20200327	Illumina NovaSeq 6000	AMPLICON	PCR
ERX4536008	ERR4603861	3	20200327	Illumina NovaSeq 6000	AMPLICON	PCR
ERX4536270	ERR4604123	3	20200327	Illumina NovaSeq 6000	AMPLICON	PCR
ERX4536275	ERR4604128	3	20200327	Illumina NovaSeq 6000	AMPLICON	PCR
ERX4536287	ERR4604140	3	20200327	Illumina NovaSeq 6000	AMPLICON	PCR
ERX4545095	ERR4616054	3	20200327	Illumina NovaSeq 6000	AMPLICON	PCR
ERX4401663	ERR4461292	3	20200327	Illumina NovaSeq 6000	AMPLICON	PCR
ERX4378763	ERR4438260	3	20200327	Illumina NovaSeq 6000	AMPLICON	PCR
ERX4402497	ERR4462126	3	20200327	Illumina NovaSeq 6000	AMPLICON	PCR
ERX4401595	ERR4461224	3	20200327	Illumina NovaSeq 6000	AMPLICON	PCR
ERX4402409	ERR4462038	3	20200327	Illumina NovaSeq 6000	AMPLICON	PCR
ERX4365055	ERR4424497	3	20200327	Illumina NovaSeq 6000	AMPLICON	PCR
ERX4399590	ERR4459219	3	20200327	Illumina NovaSeq 6000	AMPLICON	PCR
ERX4401695	ERR4461324	3	20200327	Illumina NovaSeq 6000	AMPLICON	PCR
ERX4535862	ERR4603715	3	20200327	Illumina NovaSeq 6000	AMPLICON	PCR
ERX4377989	ERR4437486	3	20200327	Illumina NovaSeq 6000	AMPLICON	PCR
ERX4401766	ERR4461395	3	20200327	Illumina NovaSeq 6000	AMPLICON	PCR
ERX4360850	ERR4413714	3	20200328	Illumina NovaSeq 6000	AMPLICON	PCR
ERX4363131	ERR4422573	3	20200328	Illumina NovaSeq 6000	AMPLICON	PCR
ERX4363630	ERR4423072	3	20200328	Illumina NovaSeq 6000	AMPLICON	PCR
ERX4363672	ERR4423114	3	20200328	Illumina NovaSeq 6000	AMPLICON	PCR
ERX4363708	ERR4423150	3	20200328	Illumina NovaSeq 6000	AMPLICON	PCR
ERX4363740	ERR4423182	3	20200328	Illumina NovaSeq 6000	AMPLICON	PCR
ERX4363844	ERR4423286	3	20200328	Illumina NovaSeq 6000	AMPLICON	PCR
ERX4363875	ERR4423317	3	20200328	Illumina NovaSeq 6000	AMPLICON	PCR
ERX4363882	ERR4423324	3	20200328	Illumina NovaSeq 6000	AMPLICON	PCR
ERX4363898	ERR4423340	3	20200328	Illumina NovaSeq 6000	AMPLICON	PCR
ERX4365252	ERR4424694	3	20200328	Illumina NovaSeq 6000	AMPLICON	PCR
ERX4377981	ERR4437478	3	20200328	Illumina NovaSeq 6000	AMPLICON	PCR
ERX4378042	ERR4437539	3	20200328	Illumina NovaSeq 6000	AMPLICON	PCR
ERX4378074	ERR4437571	3	20200328	Illumina NovaSeq 6000	AMPLICON	PCR
ERX4378090	ERR4437587	3	20200328	Illumina NovaSeq 6000	AMPLICON	PCR
ERX4378091	ERR4437588	3	20200328	Illumina NovaSeq 6000	AMPLICON	PCR
ERX4378098	ERR4437595	3	20200328	Illumina NovaSeq 6000	AMPLICON	PCR
ERX4378270	ERR4437767	3	20200328	Illumina NovaSeq 6000	AMPLICON	PCR
ERX4378841	ERR4438338	3	20200328	Illumina NovaSeq 6000	AMPLICON	PCR
ERX4399225	ERR4458854	3	20200328	Illumina NovaSeq 6000	AMPLICON	PCR
ERX4399231	ERR4458860	3	20200328	Illumina NovaSeq 6000	AMPLICON	PCR
ERX4399246	ERR4458875	3	20200328	Illumina NovaSeq 6000	AMPLICON	PCR
ERX4399265	ERR4458894	3	20200328	Illumina NovaSeq 6000	AMPLICON	PCR
ERX4399271	ERR4458900	3	20200328	Illumina NovaSeq 6000	AMPLICON	PCR
ERX4399277	ERR4458906	3	20200328	Illumina NovaSeq 6000	AMPLICON	PCR
ERX4399298	ERR4458927	3	20200328	Illumina NovaSeq 6000	AMPLICON	PCR
ERX4399312	ERR4458941	3	20200328	Illumina NovaSeq 6000	AMPLICON	PCR
ERX4399330	ERR4458959	3	20200328	Illumina NovaSeq 6000	AMPLICON	PCR
ERX4399347	ERR4458976	3	20200328	Illumina NovaSeq 6000	AMPLICON	PCR
ERX4399352	ERR4458981	3	20200328	Illumina NovaSeq 6000	AMPLICON	PCR
ERX4399368	ERR4458997	3	20200328	Illumina NovaSeq 6000	AMPLICON	PCR
ERX4399385	ERR4459014	3	20200328	Illumina NovaSeq 6000	AMPLICON	PCR
ERX4399432	ERR4459061	3	20200328	Illumina NovaSeq 6000	AMPLICON	PCR
ERX4399523	ERR4459152	3	20200328	Illumina NovaSeq 6000	AMPLICON	PCR
ERX4399536	ERR4459165	3	20200328	Illumina NovaSeq 6000	AMPLICON	PCR
ERX4399599	ERR4459228	3	20200328	Illumina NovaSeq 6000	AMPLICON	PCR
ERX4399610	ERR4459239	3	20200328	Illumina NovaSeq 6000	AMPLICON	PCR
ERX4399612	ERR4459241	3	20200328	Illumina NovaSeq 6000	AMPLICON	PCR
ERX4399619	ERR4459248	3	20200328	Illumina NovaSeq 6000	AMPLICON	PCR
ERX4399639	ERR4459268	3	20200328	Illumina NovaSeq 6000	AMPLICON	PCR
ERX4399644	ERR4459273	3	20200328	Illumina NovaSeq 6000	AMPLICON	PCR
ERX4399648	ERR4459277	3	20200328	Illumina NovaSeq 6000	AMPLICON	PCR
ERX4399668	ERR4459297	3	20200328	Illumina NovaSeq 6000	AMPLICON	PCR
ERX4399669	ERR4459298	3	20200328	Illumina NovaSeq 6000	AMPLICON	PCR
ERX4399692	ERR4459321	3	20200328	Illumina NovaSeq 6000	AMPLICON	PCR
ERX4399709	ERR4459338	3	20200328	Illumina NovaSeq 6000	AMPLICON	PCR
ERX4399735	ERR4459364	3	20200328	Illumina NovaSeq 6000	AMPLICON	PCR
ERX4399751	ERR4459380	3	20200328	Illumina NovaSeq 6000	AMPLICON	PCR
ERX4399755	ERR4459384	3	20200328	Illumina NovaSeq 6000	AMPLICON	PCR
ERX4401614	ERR4461243	3	20200328	Illumina NovaSeq 6000	AMPLICON	PCR
ERX4401643	ERR4461272	3	20200328	Illumina NovaSeq 6000	AMPLICON	PCR
ERX4401652	ERR4461281	3	20200328	Illumina NovaSeq 6000	AMPLICON	PCR
ERX4401669	ERR4461298	3	20200328	Illumina NovaSeq 6000	AMPLICON	PCR
ERX4401677	ERR4461306	3	20200328	Illumina NovaSeq 6000	AMPLICON	PCR
ERX4401723	ERR4461352	3	20200328	Illumina NovaSeq 6000	AMPLICON	PCR
ERX4401726	ERR4461355	3	20200328	Illumina NovaSeq 6000	AMPLICON	PCR
ERX4401730	ERR4461359	3	20200328	Illumina NovaSeq 6000	AMPLICON	PCR
ERX4401739	ERR4461368	3	20200328	Illumina NovaSeq 6000	AMPLICON	PCR
ERX4401767	ERR4461396	3	20200328	Illumina NovaSeq 6000	AMPLICON	PCR
ERX4401776	ERR4461405	3	20200328	Illumina NovaSeq 6000	AMPLICON	PCR
ERX4401780	ERR4461409	3	20200328	Illumina NovaSeq 6000	AMPLICON	PCR
ERX4401811	ERR4461440	3	20200328	Illumina NovaSeq 6000	AMPLICON	PCR
ERX4401885	ERR4461514	3	20200328	Illumina NovaSeq 6000	AMPLICON	PCR
ERX4401918	ERR4461547	3	20200328	Illumina NovaSeq 6000	AMPLICON	PCR
ERX4402869	ERR4462498	3	20200328	Illumina NovaSeq 6000	AMPLICON	PCR
ERX4402882	ERR4462511	3	20200328	Illumina NovaSeq 6000	AMPLICON	PCR
ERX4402892	ERR4462521	3	20200328	Illumina NovaSeq 6000	AMPLICON	PCR
ERX4402927	ERR4462556	3	20200328	Illumina NovaSeq 6000	AMPLICON	PCR
ERX4402935	ERR4462564	3	20200328	Illumina NovaSeq 6000	AMPLICON	PCR
ERX4402944	ERR4462573	3	20200328	Illumina NovaSeq 6000	AMPLICON	PCR
ERX4402953	ERR4462582	3	20200328	Illumina NovaSeq 6000	AMPLICON	PCR
ERX4402998	ERR4462627	3	20200328	Illumina NovaSeq 6000	AMPLICON	PCR
ERX4516579	ERR4581040	3	20200328	Illumina NovaSeq 6000	AMPLICON	PCR
ERX4516660	ERR4581120	3	20200328	Illumina NovaSeq 6000	AMPLICON	PCR
ERX4516681	ERR4581141	3	20200328	Illumina NovaSeq 6000	AMPLICON	PCR
ERX4516683	ERR4581143	3	20200328	Illumina NovaSeq 6000	AMPLICON	PCR
ERX4517092	ERR4581552	3	20200328	Illumina NovaSeq 6000	AMPLICON	PCR
ERX4517120	ERR4581580	3	20200328	Illumina NovaSeq 6000	AMPLICON	PCR
ERX4517194	ERR4581654	3	20200328	Illumina NovaSeq 6000	AMPLICON	PCR
ERX4517195	ERR4581655	3	20200328	Illumina NovaSeq 6000	AMPLICON	PCR
ERX4535909	ERR4603762	3	20200328	Illumina NovaSeq 6000	AMPLICON	PCR
ERX4536279	ERR4604132	3	20200328	Illumina NovaSeq 6000	AMPLICON	PCR
ERX4536280	ERR4604133	3	20200328	Illumina NovaSeq 6000	AMPLICON	PCR
ERX4401830	ERR4461459	3	20200328	Illumina NovaSeq 6000	AMPLICON	PCR
ERX4399314	ERR4458943	3	20200328	Illumina NovaSeq 6000	AMPLICON	PCR
ERX4399350	ERR4458979	3	20200328	Illumina NovaSeq 6000	AMPLICON	PCR
ERX4399243	ERR4458872	3	20200328	Illumina NovaSeq 6000	AMPLICON	PCR
ERX4377970	ERR4437467	3	20200328	Illumina NovaSeq 6000	AMPLICON	PCR
ERX4401578	ERR4461207	3	20200328	Illumina NovaSeq 6000	AMPLICON	PCR
ERX4377984	ERR4437481	3	20200328	Illumina NovaSeq 6000	AMPLICON	PCR
ERX4363722	ERR4423164	3	20200328	Illumina NovaSeq 6000	AMPLICON	PCR
ERX4517094	ERR4581554	3	20200328	Illumina NovaSeq 6000	AMPLICON	PCR
ERX4363772	ERR4423214	3	20200328	Illumina NovaSeq 6000	AMPLICON	PCR
ERX4401808	ERR4461437	3	20200328	Illumina NovaSeq 6000	AMPLICON	PCR
ERX4377762	ERR4437259	3	20200328	Illumina NovaSeq 6000	AMPLICON	PCR
ERX4399659	ERR4459288	3	20200328	Illumina NovaSeq 6000	AMPLICON	PCR
ERX4401600	ERR4461229	3	20200328	Illumina NovaSeq 6000	AMPLICON	PCR
ERX4363656	ERR4423098	3	20200328	Illumina NovaSeq 6000	AMPLICON	PCR
ERX4363713	ERR4423155	3	20200328	Illumina NovaSeq 6000	AMPLICON	PCR
ERX4363884	ERR4423326	3	20200328	Illumina NovaSeq 6000	AMPLICON	PCR
ERX4360681	ERR4413545	3	20200329	Illumina NovaSeq 6000	AMPLICON	PCR
ERX4360749	ERR4413613	3	20200329	Illumina NovaSeq 6000	AMPLICON	PCR
ERX4360828	ERR4413692	3	20200329	Illumina NovaSeq 6000	AMPLICON	PCR
ERX4360863	ERR4413727	3	20200329	Illumina NovaSeq 6000	AMPLICON	PCR
ERX4363153	ERR4422595	3	20200329	Illumina NovaSeq 6000	AMPLICON	PCR
ERX4363645	ERR4423087	3	20200329	Illumina NovaSeq 6000	AMPLICON	PCR
ERX4363649	ERR4423091	3	20200329	Illumina NovaSeq 6000	AMPLICON	PCR
ERX4363751	ERR4423193	3	20200329	Illumina NovaSeq 6000	AMPLICON	PCR
ERX4363775	ERR4423217	3	20200329	Illumina NovaSeq 6000	AMPLICON	PCR
ERX4363789	ERR4423231	3	20200329	Illumina NovaSeq 6000	AMPLICON	PCR
ERX4365319	ERR4424761	3	20200329	Illumina NovaSeq 6000	AMPLICON	PCR
ERX4377972	ERR4437469	3	20200329	Illumina NovaSeq 6000	AMPLICON	PCR
ERX4378050	ERR4437547	3	20200329	Illumina NovaSeq 6000	AMPLICON	PCR
ERX4378255	ERR4437752	3	20200329	Illumina NovaSeq 6000	AMPLICON	PCR
ERX4378300	ERR4437797	3	20200329	Illumina NovaSeq 6000	AMPLICON	PCR
ERX4378702	ERR4438199	3	20200329	Illumina NovaSeq 6000	AMPLICON	PCR
ERX4399279	ERR4458908	3	20200329	Illumina NovaSeq 6000	AMPLICON	PCR
ERX4399282	ERR4458911	3	20200329	Illumina NovaSeq 6000	AMPLICON	PCR
ERX4399316	ERR4458945	3	20200329	Illumina NovaSeq 6000	AMPLICON	PCR
ERX4399323	ERR4458952	3	20200329	Illumina NovaSeq 6000	AMPLICON	PCR
ERX4399356	ERR4458985	3	20200329	Illumina NovaSeq 6000	AMPLICON	PCR
ERX4399361	ERR4458990	3	20200329	Illumina NovaSeq 6000	AMPLICON	PCR
ERX4399503	ERR4459132	3	20200329	Illumina NovaSeq 6000	AMPLICON	PCR
ERX4399509	ERR4459138	3	20200329	Illumina NovaSeq 6000	AMPLICON	PCR
ERX4399531	ERR4459160	3	20200329	Illumina NovaSeq 6000	AMPLICON	PCR
ERX4399541	ERR4459170	3	20200329	Illumina NovaSeq 6000	AMPLICON	PCR
ERX4399544	ERR4459173	3	20200329	Illumina NovaSeq 6000	AMPLICON	PCR
ERX4399552	ERR4459181	3	20200329	Illumina NovaSeq 6000	AMPLICON	PCR
ERX4399556	ERR4459185	3	20200329	Illumina NovaSeq 6000	AMPLICON	PCR
ERX4399559	ERR4459188	3	20200329	Illumina NovaSeq 6000	AMPLICON	PCR
ERX4399566	ERR4459195	3	20200329	Illumina NovaSeq 6000	AMPLICON	PCR
ERX4399571	ERR4459200	3	20200329	Illumina NovaSeq 6000	AMPLICON	PCR
ERX4399577	ERR4459206	3	20200329	Illumina NovaSeq 6000	AMPLICON	PCR
ERX4399581	ERR4459210	3	20200329	Illumina NovaSeq 6000	AMPLICON	PCR
ERX4399594	ERR4459223	3	20200329	Illumina NovaSeq 6000	AMPLICON	PCR
ERX4399598	ERR4459227	3	20200329	Illumina NovaSeq 6000	AMPLICON	PCR
ERX4399602	ERR4459231	3	20200329	Illumina NovaSeq 6000	AMPLICON	PCR
ERX4399617	ERR4459246	3	20200329	Illumina NovaSeq 6000	AMPLICON	PCR
ERX4399624	ERR4459253	3	20200329	Illumina NovaSeq 6000	AMPLICON	PCR
ERX4399635	ERR4459264	3	20200329	Illumina NovaSeq 6000	AMPLICON	PCR
ERX4399637	ERR4459266	3	20200329	Illumina NovaSeq 6000	AMPLICON	PCR
ERX4399654	ERR4459283	3	20200329	Illumina NovaSeq 6000	AMPLICON	PCR
ERX4399677	ERR4459306	3	20200329	Illumina NovaSeq 6000	AMPLICON	PCR
ERX4399691	ERR4459320	3	20200329	Illumina NovaSeq 6000	AMPLICON	PCR
ERX4399703	ERR4459332	3	20200329	Illumina NovaSeq 6000	AMPLICON	PCR
ERX4399721	ERR4459350	3	20200329	Illumina NovaSeq 6000	AMPLICON	PCR
ERX4399729	ERR4459358	3	20200329	Illumina NovaSeq 6000	AMPLICON	PCR
ERX4399738	ERR4459367	3	20200329	Illumina NovaSeq 6000	AMPLICON	PCR
ERX4399739	ERR4459368	3	20200329	Illumina NovaSeq 6000	AMPLICON	PCR
ERX4399750	ERR4459379	3	20200329	Illumina NovaSeq 6000	AMPLICON	PCR
ERX4401622	ERR4461251	3	20200329	Illumina NovaSeq 6000	AMPLICON	PCR
ERX4401653	ERR4461282	3	20200329	Illumina NovaSeq 6000	AMPLICON	PCR
ERX4401671	ERR4461300	3	20200329	Illumina NovaSeq 6000	AMPLICON	PCR
ERX4401702	ERR4461331	3	20200329	Illumina NovaSeq 6000	AMPLICON	PCR
ERX4401801	ERR4461430	3	20200329	Illumina NovaSeq 6000	AMPLICON	PCR
ERX4401863	ERR4461492	3	20200329	Illumina NovaSeq 6000	AMPLICON	PCR
ERX4401869	ERR4461498	3	20200329	Illumina NovaSeq 6000	AMPLICON	PCR
ERX4401878	ERR4461507	3	20200329	Illumina NovaSeq 6000	AMPLICON	PCR
ERX4401883	ERR4461512	3	20200329	Illumina NovaSeq 6000	AMPLICON	PCR
ERX4401889	ERR4461518	3	20200329	Illumina NovaSeq 6000	AMPLICON	PCR
ERX4401900	ERR4461529	3	20200329	Illumina NovaSeq 6000	AMPLICON	PCR
ERX4402881	ERR4462510	3	20200329	Illumina NovaSeq 6000	AMPLICON	PCR
ERX4402887	ERR4462516	3	20200329	Illumina NovaSeq 6000	AMPLICON	PCR
ERX4402974	ERR4462603	3	20200329	Illumina NovaSeq 6000	AMPLICON	PCR
ERX4402976	ERR4462605	3	20200329	Illumina NovaSeq 6000	AMPLICON	PCR
ERX4402980	ERR4462609	3	20200329	Illumina NovaSeq 6000	AMPLICON	PCR
ERX4402984	ERR4462613	3	20200329	Illumina NovaSeq 6000	AMPLICON	PCR
ERX4402996	ERR4462625	3	20200329	Illumina NovaSeq 6000	AMPLICON	PCR
ERX4516678	ERR4581138	3	20200329	Illumina NovaSeq 6000	AMPLICON	PCR
ERX4516680	ERR4581140	3	20200329	Illumina NovaSeq 6000	AMPLICON	PCR
ERX4517080	ERR4581540	3	20200329	Illumina NovaSeq 6000	AMPLICON	PCR
ERX4517082	ERR4581542	3	20200329	Illumina NovaSeq 6000	AMPLICON	PCR
ERX4517095	ERR4581555	3	20200329	Illumina NovaSeq 6000	AMPLICON	PCR
ERX4517118	ERR4581578	3	20200329	Illumina NovaSeq 6000	AMPLICON	PCR
ERX4517134	ERR4581594	3	20200329	Illumina NovaSeq 6000	AMPLICON	PCR
ERX4517152	ERR4581612	3	20200329	Illumina NovaSeq 6000	AMPLICON	PCR
ERX4517210	ERR4581670	3	20200329	Illumina NovaSeq 6000	AMPLICON	PCR
ERX4517214	ERR4581674	3	20200329	Illumina NovaSeq 6000	AMPLICON	PCR
ERX4517216	ERR4581676	3	20200329	Illumina NovaSeq 6000	AMPLICON	PCR
ERX4517231	ERR4581691	3	20200329	Illumina NovaSeq 6000	AMPLICON	PCR
ERX4535921	ERR4603774	3	20200329	Illumina NovaSeq 6000	AMPLICON	PCR
ERX4536023	ERR4603876	3	20200329	Illumina NovaSeq 6000	AMPLICON	PCR
ERX4536258	ERR4604111	3	20200329	Illumina NovaSeq 6000	AMPLICON	PCR
ERX4536289	ERR4604142	3	20200329	Illumina NovaSeq 6000	AMPLICON	PCR
ERX4536290	ERR4604143	3	20200329	Illumina NovaSeq 6000	AMPLICON	PCR
ERX4545090	ERR4616049	3	20200329	Illumina NovaSeq 6000	AMPLICON	PCR
ERX4363625	ERR4423067	3	20200329	Illumina NovaSeq 6000	AMPLICON	PCR
ERX4536286	ERR4604139	3	20200329	Illumina NovaSeq 6000	AMPLICON	PCR
ERX4401838	ERR4461467	3	20200329	Illumina NovaSeq 6000	AMPLICON	PCR
ERX4399430	ERR4459059	3	20200329	Illumina NovaSeq 6000	AMPLICON	PCR
ERX4401893	ERR4461522	3	20200329	Illumina NovaSeq 6000	AMPLICON	PCR
ERX4402986	ERR4462615	3	20200329	Illumina NovaSeq 6000	AMPLICON	PCR
ERX4401588	ERR4461217	3	20200329	Illumina NovaSeq 6000	AMPLICON	PCR
ERX4399546	ERR4459175	3	20200329	Illumina NovaSeq 6000	AMPLICON	PCR
ERX4378289	ERR4437786	3	20200329	Illumina NovaSeq 6000	AMPLICON	PCR
ERX4378291	ERR4437788	3	20200329	Illumina NovaSeq 6000	AMPLICON	PCR
ERX4401581	ERR4461210	3	20200329	Illumina NovaSeq 6000	AMPLICON	PCR
ERX4517184	ERR4581644	3	20200329	Illumina NovaSeq 6000	AMPLICON	PCR
ERX4402890	ERR4462519	3	20200329	Illumina NovaSeq 6000	AMPLICON	PCR
ERX4399241	ERR4458870	3	20200329	Illumina NovaSeq 6000	AMPLICON	PCR
ERX4360672	ERR4413536	3	20200330	Illumina NovaSeq 6000	AMPLICON	PCR
ERX4360680	ERR4413544	3	20200330	Illumina NovaSeq 6000	AMPLICON	PCR
ERX4360685	ERR4413549	3	20200330	Illumina NovaSeq 6000	AMPLICON	PCR
ERX4360723	ERR4413587	3	20200330	Illumina NovaSeq 6000	AMPLICON	PCR
ERX4360770	ERR4413634	3	20200330	Illumina NovaSeq 6000	AMPLICON	PCR
ERX4360818	ERR4413682	3	20200330	Illumina NovaSeq 6000	AMPLICON	PCR
ERX4360847	ERR4413711	3	20200330	Illumina NovaSeq 6000	AMPLICON	PCR
ERX4360872	ERR4413736	3	20200330	Illumina NovaSeq 6000	AMPLICON	PCR
ERX4363118	ERR4422560	3	20200330	Illumina NovaSeq 6000	AMPLICON	PCR
ERX4363631	ERR4423073	3	20200330	Illumina NovaSeq 6000	AMPLICON	PCR
ERX4363706	ERR4423148	3	20200330	Illumina NovaSeq 6000	AMPLICON	PCR
ERX4363771	ERR4423213	3	20200330	Illumina NovaSeq 6000	AMPLICON	PCR
ERX4363888	ERR4423330	3	20200330	Illumina NovaSeq 6000	AMPLICON	PCR
ERX4363892	ERR4423334	3	20200330	Illumina NovaSeq 6000	AMPLICON	PCR
ERX4364592	ERR4424034	3	20200330	Illumina NovaSeq 6000	AMPLICON	PCR
ERX4364965	ERR4424407	3	20200330	Illumina NovaSeq 6000	AMPLICON	PCR
ERX4365748	ERR4425190	3	20200330	Illumina NovaSeq 6000	AMPLICON	PCR
ERX4378254	ERR4437751	3	20200330	Illumina NovaSeq 6000	AMPLICON	PCR
ERX4378256	ERR4437753	3	20200330	Illumina NovaSeq 6000	AMPLICON	PCR
ERX4378258	ERR4437755	3	20200330	Illumina NovaSeq 6000	AMPLICON	PCR
ERX4378267	ERR4437764	3	20200330	Illumina NovaSeq 6000	AMPLICON	PCR
ERX4378269	ERR4437766	3	20200330	Illumina NovaSeq 6000	AMPLICON	PCR
ERX4378278	ERR4437775	3	20200330	Illumina NovaSeq 6000	AMPLICON	PCR
ERX4378281	ERR4437778	3	20200330	Illumina NovaSeq 6000	AMPLICON	PCR
ERX4378282	ERR4437779	3	20200330	Illumina NovaSeq 6000	AMPLICON	PCR
ERX4378287	ERR4437784	3	20200330	Illumina NovaSeq 6000	AMPLICON	PCR
ERX4378294	ERR4437791	3	20200330	Illumina NovaSeq 6000	AMPLICON	PCR
ERX4378301	ERR4437798	3	20200330	Illumina NovaSeq 6000	AMPLICON	PCR
ERX4378305	ERR4437802	3	20200330	Illumina NovaSeq 6000	AMPLICON	PCR
ERX4378309	ERR4437806	3	20200330	Illumina NovaSeq 6000	AMPLICON	PCR
ERX4378311	ERR4437808	3	20200330	Illumina NovaSeq 6000	AMPLICON	PCR
ERX4378321	ERR4437818	3	20200330	Illumina NovaSeq 6000	AMPLICON	PCR
ERX4378805	ERR4438302	3	20200330	Illumina NovaSeq 6000	AMPLICON	PCR
ERX4378812	ERR4438309	3	20200330	Illumina NovaSeq 6000	AMPLICON	PCR
ERX4398878	ERR4458507	3	20200330	Illumina NovaSeq 6000	AMPLICON	PCR
ERX4398887	ERR4458516	3	20200330	Illumina NovaSeq 6000	AMPLICON	PCR
ERX4399255	ERR4458884	3	20200330	Illumina NovaSeq 6000	AMPLICON	PCR
ERX4399313	ERR4458942	3	20200330	Illumina NovaSeq 6000	AMPLICON	PCR
ERX4399387	ERR4459016	3	20200330	Illumina NovaSeq 6000	AMPLICON	PCR
ERX4399515	ERR4459144	3	20200330	Illumina NovaSeq 6000	AMPLICON	PCR
ERX4399519	ERR4459148	3	20200330	Illumina NovaSeq 6000	AMPLICON	PCR
ERX4399530	ERR4459159	3	20200330	Illumina NovaSeq 6000	AMPLICON	PCR
ERX4399545	ERR4459174	3	20200330	Illumina NovaSeq 6000	AMPLICON	PCR
ERX4399557	ERR4459186	3	20200330	Illumina NovaSeq 6000	AMPLICON	PCR
ERX4399572	ERR4459201	3	20200330	Illumina NovaSeq 6000	AMPLICON	PCR
ERX4399592	ERR4459221	3	20200330	Illumina NovaSeq 6000	AMPLICON	PCR
ERX4399607	ERR4459236	3	20200330	Illumina NovaSeq 6000	AMPLICON	PCR
ERX4399613	ERR4459242	3	20200330	Illumina NovaSeq 6000	AMPLICON	PCR
ERX4399647	ERR4459276	3	20200330	Illumina NovaSeq 6000	AMPLICON	PCR
ERX4399653	ERR4459282	3	20200330	Illumina NovaSeq 6000	AMPLICON	PCR
ERX4399656	ERR4459285	3	20200330	Illumina NovaSeq 6000	AMPLICON	PCR
ERX4399666	ERR4459295	3	20200330	Illumina NovaSeq 6000	AMPLICON	PCR
ERX4399671	ERR4459300	3	20200330	Illumina NovaSeq 6000	AMPLICON	PCR
ERX4399695	ERR4459324	3	20200330	Illumina NovaSeq 6000	AMPLICON	PCR
ERX4399746	ERR4459375	3	20200330	Illumina NovaSeq 6000	AMPLICON	PCR
ERX4399747	ERR4459376	3	20200330	Illumina NovaSeq 6000	AMPLICON	PCR
ERX4399754	ERR4459383	3	20200330	Illumina NovaSeq 6000	AMPLICON	PCR
ERX4399756	ERR4459385	3	20200330	Illumina NovaSeq 6000	AMPLICON	PCR
ERX4401580	ERR4461209	3	20200330	Illumina NovaSeq 6000	AMPLICON	PCR
ERX4401598	ERR4461227	3	20200330	Illumina NovaSeq 6000	AMPLICON	PCR
ERX4401658	ERR4461287	3	20200330	Illumina NovaSeq 6000	AMPLICON	PCR
ERX4401672	ERR4461301	3	20200330	Illumina NovaSeq 6000	AMPLICON	PCR
ERX4401678	ERR4461307	3	20200330	Illumina NovaSeq 6000	AMPLICON	PCR
ERX4401714	ERR4461343	3	20200330	Illumina NovaSeq 6000	AMPLICON	PCR
ERX4401721	ERR4461350	3	20200330	Illumina NovaSeq 6000	AMPLICON	PCR
ERX4401748	ERR4461377	3	20200330	Illumina NovaSeq 6000	AMPLICON	PCR
ERX4401800	ERR4461429	3	20200330	Illumina NovaSeq 6000	AMPLICON	PCR
ERX4401804	ERR4461433	3	20200330	Illumina NovaSeq 6000	AMPLICON	PCR
ERX4401819	ERR4461448	3	20200330	Illumina NovaSeq 6000	AMPLICON	PCR
ERX4401825	ERR4461454	3	20200330	Illumina NovaSeq 6000	AMPLICON	PCR
ERX4401827	ERR4461456	3	20200330	Illumina NovaSeq 6000	AMPLICON	PCR
ERX4401852	ERR4461481	3	20200330	Illumina NovaSeq 6000	AMPLICON	PCR
ERX4401920	ERR4461549	3	20200330	Illumina NovaSeq 6000	AMPLICON	PCR
ERX4402915	ERR4462544	3	20200330	Illumina NovaSeq 6000	AMPLICON	PCR
ERX4402963	ERR4462592	3	20200330	Illumina NovaSeq 6000	AMPLICON	PCR
ERX4403189	ERR4462818	3	20200330	Illumina NovaSeq 6000	AMPLICON	PCR
ERX4517078	ERR4581538	3	20200330	Illumina NovaSeq 6000	AMPLICON	PCR
ERX4517228	ERR4581688	3	20200330	Illumina NovaSeq 6000	AMPLICON	PCR
ERX4535870	ERR4603723	3	20200330	Illumina NovaSeq 6000	AMPLICON	PCR
ERX4535914	ERR4603767	3	20200330	Illumina NovaSeq 6000	AMPLICON	PCR
ERX4536214	ERR4604067	3	20200330	Illumina NovaSeq 6000	AMPLICON	PCR
ERX4536242	ERR4604095	3	20200330	Illumina NovaSeq 6000	AMPLICON	PCR
ERX4536302	ERR4604155	3	20200330	Illumina NovaSeq 6000	AMPLICON	PCR
ERX4399681	ERR4459310	3	20200330	Illumina NovaSeq 6000	AMPLICON	PCR
ERX4360861	ERR4413725	3	20200330	Illumina NovaSeq 6000	AMPLICON	PCR
ERX4378303	ERR4437800	3	20200330	Illumina NovaSeq 6000	AMPLICON	PCR
ERX4360688	ERR4413552	3	20200330	Illumina NovaSeq 6000	AMPLICON	PCR
ERX4401691	ERR4461320	3	20200330	Illumina NovaSeq 6000	AMPLICON	PCR
ERX4360790	ERR4413654	3	20200330	Illumina NovaSeq 6000	AMPLICON	PCR
ERX4360700	ERR4413564	3	20200330	Illumina NovaSeq 6000	AMPLICON	PCR
ERX4360702	ERR4413566	3	20200330	Illumina NovaSeq 6000	AMPLICON	PCR
ERX4399694	ERR4459323	3	20200330	Illumina NovaSeq 6000	AMPLICON	PCR
ERX4378322	ERR4437819	3	20200330	Illumina NovaSeq 6000	AMPLICON	PCR
ERX4378251	ERR4437748	3	20200330	Illumina NovaSeq 6000	AMPLICON	PCR
ERX4401684	ERR4461313	3	20200330	Illumina NovaSeq 6000	AMPLICON	PCR
ERX4399708	ERR4459337	3	20200330	Illumina NovaSeq 6000	AMPLICON	PCR
ERX4360677	ERR4413541	3	20200330	Illumina NovaSeq 6000	AMPLICON	PCR
ERX4401836	ERR4461465	3	20200330	Illumina NovaSeq 6000	AMPLICON	PCR
ERX4360824	ERR4413688	3	20200330	Illumina NovaSeq 6000	AMPLICON	PCR
ERX4401750	ERR4461379	3	20200330	Illumina NovaSeq 6000	AMPLICON	PCR
ERX4360668	ERR4413532	3	20200331	Illumina NovaSeq 6000	AMPLICON	PCR
ERX4360686	ERR4413550	3	20200331	Illumina NovaSeq 6000	AMPLICON	PCR
ERX4360687	ERR4413551	3	20200331	Illumina NovaSeq 6000	AMPLICON	PCR
ERX4360694	ERR4413558	3	20200331	Illumina NovaSeq 6000	AMPLICON	PCR
ERX4360704	ERR4413568	3	20200331	Illumina NovaSeq 6000	AMPLICON	PCR
ERX4360705	ERR4413569	3	20200331	Illumina NovaSeq 6000	AMPLICON	PCR
ERX4360706	ERR4413570	3	20200331	Illumina NovaSeq 6000	AMPLICON	PCR
ERX4360718	ERR4413582	3	20200331	Illumina NovaSeq 6000	AMPLICON	PCR
ERX4360719	ERR4413583	3	20200331	Illumina NovaSeq 6000	AMPLICON	PCR
ERX4360728	ERR4413592	3	20200331	Illumina NovaSeq 6000	AMPLICON	PCR
ERX4360741	ERR4413605	3	20200331	Illumina NovaSeq 6000	AMPLICON	PCR
ERX4360751	ERR4413615	3	20200331	Illumina NovaSeq 6000	AMPLICON	PCR
ERX4360752	ERR4413616	3	20200331	Illumina NovaSeq 6000	AMPLICON	PCR
ERX4360756	ERR4413620	3	20200331	Illumina NovaSeq 6000	AMPLICON	PCR
ERX4360761	ERR4413625	3	20200331	Illumina NovaSeq 6000	AMPLICON	PCR
ERX4360768	ERR4413632	3	20200331	Illumina NovaSeq 6000	AMPLICON	PCR
ERX4360769	ERR4413633	3	20200331	Illumina NovaSeq 6000	AMPLICON	PCR
ERX4360777	ERR4413641	3	20200331	Illumina NovaSeq 6000	AMPLICON	PCR
ERX4360779	ERR4413643	3	20200331	Illumina NovaSeq 6000	AMPLICON	PCR
ERX4360815	ERR4413679	3	20200331	Illumina NovaSeq 6000	AMPLICON	PCR
ERX4360826	ERR4413690	3	20200331	Illumina NovaSeq 6000	AMPLICON	PCR
ERX4360834	ERR4413698	3	20200331	Illumina NovaSeq 6000	AMPLICON	PCR
ERX4360837	ERR4413701	3	20200331	Illumina NovaSeq 6000	AMPLICON	PCR
ERX4360839	ERR4413703	3	20200331	Illumina NovaSeq 6000	AMPLICON	PCR
ERX4360851	ERR4413715	3	20200331	Illumina NovaSeq 6000	AMPLICON	PCR
ERX4360867	ERR4413731	3	20200331	Illumina NovaSeq 6000	AMPLICON	PCR
ERX4363684	ERR4423126	3	20200331	Illumina NovaSeq 6000	AMPLICON	PCR
ERX4363695	ERR4423137	3	20200331	Illumina NovaSeq 6000	AMPLICON	PCR
ERX4363698	ERR4423140	3	20200331	Illumina NovaSeq 6000	AMPLICON	PCR
ERX4363762	ERR4423204	3	20200331	Illumina NovaSeq 6000	AMPLICON	PCR
ERX4363818	ERR4423260	3	20200331	Illumina NovaSeq 6000	AMPLICON	PCR
ERX4363826	ERR4423268	3	20200331	Illumina NovaSeq 6000	AMPLICON	PCR
ERX4363830	ERR4423272	3	20200331	Illumina NovaSeq 6000	AMPLICON	PCR
ERX4363860	ERR4423302	3	20200331	Illumina NovaSeq 6000	AMPLICON	PCR
ERX4363861	ERR4423303	3	20200331	Illumina NovaSeq 6000	AMPLICON	PCR
ERX4363899	ERR4423341	3	20200331	Illumina NovaSeq 6000	AMPLICON	PCR
ERX4364971	ERR4424413	3	20200331	Illumina NovaSeq 6000	AMPLICON	PCR
ERX4365105	ERR4424547	3	20200331	Illumina NovaSeq 6000	AMPLICON	PCR
ERX4365139	ERR4424581	3	20200331	Illumina NovaSeq 6000	AMPLICON	PCR
ERX4378252	ERR4437749	3	20200331	Illumina NovaSeq 6000	AMPLICON	PCR
ERX4378265	ERR4437762	3	20200331	Illumina NovaSeq 6000	AMPLICON	PCR
ERX4378307	ERR4437804	3	20200331	Illumina NovaSeq 6000	AMPLICON	PCR
ERX4378318	ERR4437815	3	20200331	Illumina NovaSeq 6000	AMPLICON	PCR
ERX4378679	ERR4438176	3	20200331	Illumina NovaSeq 6000	AMPLICON	PCR
ERX4378740	ERR4438237	3	20200331	Illumina NovaSeq 6000	AMPLICON	PCR
ERX4378744	ERR4438241	3	20200331	Illumina NovaSeq 6000	AMPLICON	PCR
ERX4378749	ERR4438246	3	20200331	Illumina NovaSeq 6000	AMPLICON	PCR
ERX4378820	ERR4438317	3	20200331	Illumina NovaSeq 6000	AMPLICON	PCR
ERX4398506	ERR4458135	3	20200331	Illumina NovaSeq 6000	AMPLICON	PCR
ERX4398524	ERR4458153	3	20200331	Illumina NovaSeq 6000	AMPLICON	PCR
ERX4398595	ERR4458224	3	20200331	Illumina NovaSeq 6000	AMPLICON	PCR
ERX4398610	ERR4458239	3	20200331	Illumina NovaSeq 6000	AMPLICON	PCR
ERX4398627	ERR4458256	3	20200331	Illumina NovaSeq 6000	AMPLICON	PCR
ERX4399081	ERR4458710	3	20200331	Illumina NovaSeq 6000	AMPLICON	PCR
ERX4399201	ERR4458830	3	20200331	Illumina NovaSeq 6000	AMPLICON	PCR
ERX4399222	ERR4458851	3	20200331	Illumina NovaSeq 6000	AMPLICON	PCR
ERX4399309	ERR4458938	3	20200331	Illumina NovaSeq 6000	AMPLICON	PCR
ERX4399424	ERR4459053	3	20200331	Illumina NovaSeq 6000	AMPLICON	PCR
ERX4399426	ERR4459055	3	20200331	Illumina NovaSeq 6000	AMPLICON	PCR
ERX4399457	ERR4459086	3	20200331	Illumina NovaSeq 6000	AMPLICON	PCR
ERX4399482	ERR4459111	3	20200331	Illumina NovaSeq 6000	AMPLICON	PCR
ERX4399494	ERR4459123	3	20200331	Illumina NovaSeq 6000	AMPLICON	PCR
ERX4399511	ERR4459140	3	20200331	Illumina NovaSeq 6000	AMPLICON	PCR
ERX4399526	ERR4459155	3	20200331	Illumina NovaSeq 6000	AMPLICON	PCR
ERX4399563	ERR4459192	3	20200331	Illumina NovaSeq 6000	AMPLICON	PCR
ERX4399587	ERR4459216	3	20200331	Illumina NovaSeq 6000	AMPLICON	PCR
ERX4399631	ERR4459260	3	20200331	Illumina NovaSeq 6000	AMPLICON	PCR
ERX4399673	ERR4459302	3	20200331	Illumina NovaSeq 6000	AMPLICON	PCR
ERX4399713	ERR4459342	3	20200331	Illumina NovaSeq 6000	AMPLICON	PCR
ERX4399730	ERR4459359	3	20200331	Illumina NovaSeq 6000	AMPLICON	PCR
ERX4399737	ERR4459366	3	20200331	Illumina NovaSeq 6000	AMPLICON	PCR
ERX4400123	ERR4459752	3	20200331	Illumina NovaSeq 6000	AMPLICON	PCR
ERX4400319	ERR4459948	3	20200331	Illumina NovaSeq 6000	AMPLICON	PCR
ERX4400428	ERR4460057	3	20200331	Illumina NovaSeq 6000	AMPLICON	PCR
ERX4400524	ERR4460153	3	20200331	Illumina NovaSeq 6000	AMPLICON	PCR
ERX4402902	ERR4462531	3	20200331	Illumina NovaSeq 6000	AMPLICON	PCR
ERX4402906	ERR4462535	3	20200331	Illumina NovaSeq 6000	AMPLICON	PCR
ERX4402930	ERR4462559	3	20200331	Illumina NovaSeq 6000	AMPLICON	PCR
ERX4402931	ERR4462560	3	20200331	Illumina NovaSeq 6000	AMPLICON	PCR
ERX4402932	ERR4462561	3	20200331	Illumina NovaSeq 6000	AMPLICON	PCR
ERX4402954	ERR4462583	3	20200331	Illumina NovaSeq 6000	AMPLICON	PCR
ERX4402956	ERR4462585	3	20200331	Illumina NovaSeq 6000	AMPLICON	PCR
ERX4402972	ERR4462601	3	20200331	Illumina NovaSeq 6000	AMPLICON	PCR
ERX4403058	ERR4462687	3	20200331	Illumina NovaSeq 6000	AMPLICON	PCR
ERX4403148	ERR4462777	3	20200331	Illumina NovaSeq 6000	AMPLICON	PCR
ERX4403194	ERR4462823	3	20200331	Illumina NovaSeq 6000	AMPLICON	PCR
ERX4403202	ERR4462831	3	20200331	Illumina NovaSeq 6000	AMPLICON	PCR
ERX4403204	ERR4462833	3	20200331	Illumina NovaSeq 6000	AMPLICON	PCR
ERX4535860	ERR4603713	3	20200331	Illumina NovaSeq 6000	AMPLICON	PCR
ERX4535949	ERR4603802	3	20200331	Illumina NovaSeq 6000	AMPLICON	PCR
ERX4535993	ERR4603846	3	20200331	Illumina NovaSeq 6000	AMPLICON	PCR
ERX4536049	ERR4603902	3	20200331	Illumina NovaSeq 6000	AMPLICON	PCR
ERX4536249	ERR4604102	3	20200331	Illumina NovaSeq 6000	AMPLICON	PCR
ERX4545084	ERR4616043	3	20200331	Illumina NovaSeq 6000	AMPLICON	PCR
ERX4545108	ERR4616067	3	20200331	Illumina NovaSeq 6000	AMPLICON	PCR
ERX4360747	ERR4413611	3	20200331	Illumina NovaSeq 6000	AMPLICON	PCR
ERX4365345	ERR4424787	3	20200331	Illumina NovaSeq 6000	AMPLICON	PCR
ERX4360825	ERR4413689	3	20200331	Illumina NovaSeq 6000	AMPLICON	PCR
ERX4360816	ERR4413680	3	20200331	Illumina NovaSeq 6000	AMPLICON	PCR
ERX4363811	ERR4423253	3	20200331	Illumina NovaSeq 6000	AMPLICON	PCR
ERX4276047	ERR4329213	3	20200401	Illumina NovaSeq 6000	AMPLICON	PCR
ERX4276093	ERR4329259	3	20200401	Illumina NovaSeq 6000	AMPLICON	PCR
ERX4276149	ERR4329315	3	20200401	Illumina NovaSeq 6000	AMPLICON	PCR
ERX4276160	ERR4329326	3	20200401	Illumina NovaSeq 6000	AMPLICON	PCR
ERX4276183	ERR4329349	3	20200401	Illumina NovaSeq 6000	AMPLICON	PCR
ERX4276220	ERR4329386	3	20200401	Illumina NovaSeq 6000	AMPLICON	PCR
ERX4276239	ERR4329405	3	20200401	Illumina NovaSeq 6000	AMPLICON	PCR
ERX4276264	ERR4329430	3	20200401	Illumina NovaSeq 6000	AMPLICON	PCR
ERX4360670	ERR4413534	3	20200401	Illumina NovaSeq 6000	AMPLICON	PCR
ERX4360678	ERR4413542	3	20200401	Illumina NovaSeq 6000	AMPLICON	PCR
ERX4360682	ERR4413546	3	20200401	Illumina NovaSeq 6000	AMPLICON	PCR
ERX4360683	ERR4413547	3	20200401	Illumina NovaSeq 6000	AMPLICON	PCR
ERX4360698	ERR4413562	3	20200401	Illumina NovaSeq 6000	AMPLICON	PCR
ERX4360708	ERR4413572	3	20200401	Illumina NovaSeq 6000	AMPLICON	PCR
ERX4360709	ERR4413573	3	20200401	Illumina NovaSeq 6000	AMPLICON	PCR
ERX4360714	ERR4413578	3	20200401	Illumina NovaSeq 6000	AMPLICON	PCR
ERX4360716	ERR4413580	3	20200401	Illumina NovaSeq 6000	AMPLICON	PCR
ERX4360767	ERR4413631	3	20200401	Illumina NovaSeq 6000	AMPLICON	PCR
ERX4360772	ERR4413636	3	20200401	Illumina NovaSeq 6000	AMPLICON	PCR
ERX4360773	ERR4413637	3	20200401	Illumina NovaSeq 6000	AMPLICON	PCR
ERX4360775	ERR4413639	3	20200401	Illumina NovaSeq 6000	AMPLICON	PCR
ERX4360782	ERR4413646	3	20200401	Illumina NovaSeq 6000	AMPLICON	PCR
ERX4360785	ERR4413649	3	20200401	Illumina NovaSeq 6000	AMPLICON	PCR
ERX4360807	ERR4413671	3	20200401	Illumina NovaSeq 6000	AMPLICON	PCR
ERX4360821	ERR4413685	3	20200401	Illumina NovaSeq 6000	AMPLICON	PCR
ERX4360830	ERR4413694	3	20200401	Illumina NovaSeq 6000	AMPLICON	PCR
ERX4360860	ERR4413724	3	20200401	Illumina NovaSeq 6000	AMPLICON	PCR
ERX4360862	ERR4413726	3	20200401	Illumina NovaSeq 6000	AMPLICON	PCR
ERX4360873	ERR4413737	3	20200401	Illumina NovaSeq 6000	AMPLICON	PCR
ERX4360897	ERR4413761	3	20200401	Illumina NovaSeq 6000	AMPLICON	PCR
ERX4363719	ERR4423161	3	20200401	Illumina NovaSeq 6000	AMPLICON	PCR
ERX4363726	ERR4423168	3	20200401	Illumina NovaSeq 6000	AMPLICON	PCR
ERX4363735	ERR4423177	3	20200401	Illumina NovaSeq 6000	AMPLICON	PCR
ERX4363800	ERR4423242	3	20200401	Illumina NovaSeq 6000	AMPLICON	PCR
ERX4363835	ERR4423277	3	20200401	Illumina NovaSeq 6000	AMPLICON	PCR
ERX4363842	ERR4423284	3	20200401	Illumina NovaSeq 6000	AMPLICON	PCR
ERX4363850	ERR4423292	3	20200401	Illumina NovaSeq 6000	AMPLICON	PCR
ERX4363894	ERR4423336	3	20200401	Illumina NovaSeq 6000	AMPLICON	PCR
ERX4365080	ERR4424522	3	20200401	Illumina NovaSeq 6000	AMPLICON	PCR
ERX4365102	ERR4424544	3	20200401	Illumina NovaSeq 6000	AMPLICON	PCR
ERX4365108	ERR4424550	3	20200401	Illumina NovaSeq 6000	AMPLICON	PCR
ERX4365318	ERR4424760	3	20200401	Illumina NovaSeq 6000	AMPLICON	PCR
ERX4365438	ERR4424880	3	20200401	Illumina NovaSeq 6000	AMPLICON	PCR
ERX4365531	ERR4424973	3	20200401	Illumina NovaSeq 6000	AMPLICON	PCR
ERX4365541	ERR4424983	3	20200401	Illumina NovaSeq 6000	AMPLICON	PCR
ERX4365591	ERR4425033	3	20200401	Illumina NovaSeq 6000	AMPLICON	PCR
ERX4378709	ERR4438206	3	20200401	Illumina NovaSeq 6000	AMPLICON	PCR
ERX4398532	ERR4458161	3	20200401	Illumina NovaSeq 6000	AMPLICON	PCR
ERX4398545	ERR4458174	3	20200401	Illumina NovaSeq 6000	AMPLICON	PCR
ERX4399399	ERR4459028	3	20200401	Illumina NovaSeq 6000	AMPLICON	PCR
ERX4399474	ERR4459103	3	20200401	Illumina NovaSeq 6000	AMPLICON	PCR
ERX4399478	ERR4459107	3	20200401	Illumina NovaSeq 6000	AMPLICON	PCR
ERX4399488	ERR4459117	3	20200401	Illumina NovaSeq 6000	AMPLICON	PCR
ERX4399811	ERR4459440	3	20200401	Illumina NovaSeq 6000	AMPLICON	PCR
ERX4399843	ERR4459472	3	20200401	Illumina NovaSeq 6000	AMPLICON	PCR
ERX4399930	ERR4459559	3	20200401	Illumina NovaSeq 6000	AMPLICON	PCR
ERX4399953	ERR4459582	3	20200401	Illumina NovaSeq 6000	AMPLICON	PCR
ERX4399982	ERR4459611	3	20200401	Illumina NovaSeq 6000	AMPLICON	PCR
ERX4399987	ERR4459616	3	20200401	Illumina NovaSeq 6000	AMPLICON	PCR
ERX4400006	ERR4459635	3	20200401	Illumina NovaSeq 6000	AMPLICON	PCR
ERX4400016	ERR4459645	3	20200401	Illumina NovaSeq 6000	AMPLICON	PCR
ERX4400037	ERR4459666	3	20200401	Illumina NovaSeq 6000	AMPLICON	PCR
ERX4400051	ERR4459680	3	20200401	Illumina NovaSeq 6000	AMPLICON	PCR
ERX4400074	ERR4459703	3	20200401	Illumina NovaSeq 6000	AMPLICON	PCR
ERX4400078	ERR4459707	3	20200401	Illumina NovaSeq 6000	AMPLICON	PCR
ERX4400091	ERR4459720	3	20200401	Illumina NovaSeq 6000	AMPLICON	PCR
ERX4400108	ERR4459737	3	20200401	Illumina NovaSeq 6000	AMPLICON	PCR
ERX4400138	ERR4459767	3	20200401	Illumina NovaSeq 6000	AMPLICON	PCR
ERX4400145	ERR4459774	3	20200401	Illumina NovaSeq 6000	AMPLICON	PCR
ERX4400151	ERR4459780	3	20200401	Illumina NovaSeq 6000	AMPLICON	PCR
ERX4400176	ERR4459805	3	20200401	Illumina NovaSeq 6000	AMPLICON	PCR
ERX4400183	ERR4459812	3	20200401	Illumina NovaSeq 6000	AMPLICON	PCR
ERX4400233	ERR4459862	3	20200401	Illumina NovaSeq 6000	AMPLICON	PCR
ERX4400283	ERR4459912	3	20200401	Illumina NovaSeq 6000	AMPLICON	PCR
ERX4400301	ERR4459930	3	20200401	Illumina NovaSeq 6000	AMPLICON	PCR
ERX4400398	ERR4460027	3	20200401	Illumina NovaSeq 6000	AMPLICON	PCR
ERX4402889	ERR4462518	3	20200401	Illumina NovaSeq 6000	AMPLICON	PCR
ERX4402898	ERR4462527	3	20200401	Illumina NovaSeq 6000	AMPLICON	PCR
ERX4402926	ERR4462555	3	20200401	Illumina NovaSeq 6000	AMPLICON	PCR
ERX4402939	ERR4462568	3	20200401	Illumina NovaSeq 6000	AMPLICON	PCR
ERX4402975	ERR4462604	3	20200401	Illumina NovaSeq 6000	AMPLICON	PCR
ERX4402985	ERR4462614	3	20200401	Illumina NovaSeq 6000	AMPLICON	PCR
ERX4402995	ERR4462624	3	20200401	Illumina NovaSeq 6000	AMPLICON	PCR
ERX4402997	ERR4462626	3	20200401	Illumina NovaSeq 6000	AMPLICON	PCR
ERX4535922	ERR4603775	3	20200401	Illumina NovaSeq 6000	AMPLICON	PCR
ERX4535997	ERR4603850	3	20200401	Illumina NovaSeq 6000	AMPLICON	PCR
ERX4536061	ERR4603914	3	20200401	Illumina NovaSeq 6000	AMPLICON	PCR
ERX4536062	ERR4603915	3	20200401	Illumina NovaSeq 6000	AMPLICON	PCR
ERX4536092	ERR4603945	3	20200401	Illumina NovaSeq 6000	AMPLICON	PCR
ERX4536130	ERR4603983	3	20200401	Illumina NovaSeq 6000	AMPLICON	PCR
ERX4536223	ERR4604076	3	20200401	Illumina NovaSeq 6000	AMPLICON	PCR
ERX4360856	ERR4413720	3	20200401	Illumina NovaSeq 6000	AMPLICON	PCR
ERX4536096	ERR4603949	3	20200401	Illumina NovaSeq 6000	AMPLICON	PCR
ERX4400007	ERR4459636	3	20200401	Illumina NovaSeq 6000	AMPLICON	PCR
ERX4536079	ERR4603932	3	20200401	Illumina NovaSeq 6000	AMPLICON	PCR
ERX4276257	ERR4329423	3	20200401	Illumina NovaSeq 6000	AMPLICON	PCR
ERX4399483	ERR4459112	3	20200401	Illumina NovaSeq 6000	AMPLICON	PCR
ERX4378723	ERR4438220	3	20200401	Illumina NovaSeq 6000	AMPLICON	PCR
ERX4399880	ERR4459509	3	20200401	Illumina NovaSeq 6000	AMPLICON	PCR
ERX4399491	ERR4459120	3	20200401	Illumina NovaSeq 6000	AMPLICON	PCR
ERX4276095	ERR4329261	3	20200402	Illumina NovaSeq 6000	AMPLICON	PCR
ERX4276098	ERR4329264	3	20200402	Illumina NovaSeq 6000	AMPLICON	PCR
ERX4276154	ERR4329320	3	20200402	Illumina NovaSeq 6000	AMPLICON	PCR
ERX4276170	ERR4329336	3	20200402	Illumina NovaSeq 6000	AMPLICON	PCR
ERX4276221	ERR4329387	3	20200402	Illumina NovaSeq 6000	AMPLICON	PCR
ERX4360739	ERR4413603	3	20200402	Illumina NovaSeq 6000	AMPLICON	PCR
ERX4363788	ERR4423230	3	20200402	Illumina NovaSeq 6000	AMPLICON	PCR
ERX4363855	ERR4423297	3	20200402	Illumina NovaSeq 6000	AMPLICON	PCR
ERX4363903	ERR4423345	3	20200402	Illumina NovaSeq 6000	AMPLICON	PCR
ERX4365132	ERR4424574	3	20200402	Illumina NovaSeq 6000	AMPLICON	PCR
ERX4365365	ERR4424807	3	20200402	Illumina NovaSeq 6000	AMPLICON	PCR
ERX4365432	ERR4424874	3	20200402	Illumina NovaSeq 6000	AMPLICON	PCR
ERX4365451	ERR4424893	3	20200402	Illumina NovaSeq 6000	AMPLICON	PCR
ERX4365596	ERR4425038	3	20200402	Illumina NovaSeq 6000	AMPLICON	PCR
ERX4365597	ERR4425039	3	20200402	Illumina NovaSeq 6000	AMPLICON	PCR
ERX4365784	ERR4425226	3	20200402	Illumina NovaSeq 6000	AMPLICON	PCR
ERX4378688	ERR4438185	3	20200402	Illumina NovaSeq 6000	AMPLICON	PCR
ERX4378802	ERR4438299	3	20200402	Illumina NovaSeq 6000	AMPLICON	PCR
ERX4378825	ERR4438322	3	20200402	Illumina NovaSeq 6000	AMPLICON	PCR
ERX4399455	ERR4459084	3	20200402	Illumina NovaSeq 6000	AMPLICON	PCR
ERX4399490	ERR4459119	3	20200402	Illumina NovaSeq 6000	AMPLICON	PCR
ERX4399765	ERR4459394	3	20200402	Illumina NovaSeq 6000	AMPLICON	PCR
ERX4399779	ERR4459408	3	20200402	Illumina NovaSeq 6000	AMPLICON	PCR
ERX4399788	ERR4459417	3	20200402	Illumina NovaSeq 6000	AMPLICON	PCR
ERX4399808	ERR4459437	3	20200402	Illumina NovaSeq 6000	AMPLICON	PCR
ERX4399817	ERR4459446	3	20200402	Illumina NovaSeq 6000	AMPLICON	PCR
ERX4399842	ERR4459471	3	20200402	Illumina NovaSeq 6000	AMPLICON	PCR
ERX4399845	ERR4459474	3	20200402	Illumina NovaSeq 6000	AMPLICON	PCR
ERX4399859	ERR4459488	3	20200402	Illumina NovaSeq 6000	AMPLICON	PCR
ERX4399877	ERR4459506	3	20200402	Illumina NovaSeq 6000	AMPLICON	PCR
ERX4399911	ERR4459540	3	20200402	Illumina NovaSeq 6000	AMPLICON	PCR
ERX4399929	ERR4459558	3	20200402	Illumina NovaSeq 6000	AMPLICON	PCR
ERX4400001	ERR4459630	3	20200402	Illumina NovaSeq 6000	AMPLICON	PCR
ERX4400004	ERR4459633	3	20200402	Illumina NovaSeq 6000	AMPLICON	PCR
ERX4400010	ERR4459639	3	20200402	Illumina NovaSeq 6000	AMPLICON	PCR
ERX4400042	ERR4459671	3	20200402	Illumina NovaSeq 6000	AMPLICON	PCR
ERX4400066	ERR4459695	3	20200402	Illumina NovaSeq 6000	AMPLICON	PCR
ERX4400067	ERR4459696	3	20200402	Illumina NovaSeq 6000	AMPLICON	PCR
ERX4400071	ERR4459700	3	20200402	Illumina NovaSeq 6000	AMPLICON	PCR
ERX4400080	ERR4459709	3	20200402	Illumina NovaSeq 6000	AMPLICON	PCR
ERX4400086	ERR4459715	3	20200402	Illumina NovaSeq 6000	AMPLICON	PCR
ERX4400099	ERR4459728	3	20200402	Illumina NovaSeq 6000	AMPLICON	PCR
ERX4400105	ERR4459734	3	20200402	Illumina NovaSeq 6000	AMPLICON	PCR
ERX4400110	ERR4459739	3	20200402	Illumina NovaSeq 6000	AMPLICON	PCR
ERX4400114	ERR4459743	3	20200402	Illumina NovaSeq 6000	AMPLICON	PCR
ERX4400144	ERR4459773	3	20200402	Illumina NovaSeq 6000	AMPLICON	PCR
ERX4400189	ERR4459818	3	20200402	Illumina NovaSeq 6000	AMPLICON	PCR
ERX4400210	ERR4459839	3	20200402	Illumina NovaSeq 6000	AMPLICON	PCR
ERX4400227	ERR4459856	3	20200402	Illumina NovaSeq 6000	AMPLICON	PCR
ERX4400229	ERR4459858	3	20200402	Illumina NovaSeq 6000	AMPLICON	PCR
ERX4400235	ERR4459864	3	20200402	Illumina NovaSeq 6000	AMPLICON	PCR
ERX4400246	ERR4459875	3	20200402	Illumina NovaSeq 6000	AMPLICON	PCR
ERX4400248	ERR4459877	3	20200402	Illumina NovaSeq 6000	AMPLICON	PCR
ERX4400252	ERR4459881	3	20200402	Illumina NovaSeq 6000	AMPLICON	PCR
ERX4400258	ERR4459887	3	20200402	Illumina NovaSeq 6000	AMPLICON	PCR
ERX4400259	ERR4459888	3	20200402	Illumina NovaSeq 6000	AMPLICON	PCR
ERX4400267	ERR4459896	3	20200402	Illumina NovaSeq 6000	AMPLICON	PCR
ERX4400273	ERR4459902	3	20200402	Illumina NovaSeq 6000	AMPLICON	PCR
ERX4400288	ERR4459917	3	20200402	Illumina NovaSeq 6000	AMPLICON	PCR
ERX4400289	ERR4459918	3	20200402	Illumina NovaSeq 6000	AMPLICON	PCR
ERX4400291	ERR4459920	3	20200402	Illumina NovaSeq 6000	AMPLICON	PCR
ERX4400296	ERR4459925	3	20200402	Illumina NovaSeq 6000	AMPLICON	PCR
ERX4400299	ERR4459928	3	20200402	Illumina NovaSeq 6000	AMPLICON	PCR
ERX4400312	ERR4459941	3	20200402	Illumina NovaSeq 6000	AMPLICON	PCR
ERX4400318	ERR4459947	3	20200402	Illumina NovaSeq 6000	AMPLICON	PCR
ERX4400320	ERR4459949	3	20200402	Illumina NovaSeq 6000	AMPLICON	PCR
ERX4400326	ERR4459955	3	20200402	Illumina NovaSeq 6000	AMPLICON	PCR
ERX4400328	ERR4459957	3	20200402	Illumina NovaSeq 6000	AMPLICON	PCR
ERX4400335	ERR4459964	3	20200402	Illumina NovaSeq 6000	AMPLICON	PCR
ERX4400341	ERR4459970	3	20200402	Illumina NovaSeq 6000	AMPLICON	PCR
ERX4400358	ERR4459987	3	20200402	Illumina NovaSeq 6000	AMPLICON	PCR
ERX4400359	ERR4459988	3	20200402	Illumina NovaSeq 6000	AMPLICON	PCR
ERX4400361	ERR4459990	3	20200402	Illumina NovaSeq 6000	AMPLICON	PCR
ERX4400367	ERR4459996	3	20200402	Illumina NovaSeq 6000	AMPLICON	PCR
ERX4400370	ERR4459999	3	20200402	Illumina NovaSeq 6000	AMPLICON	PCR
ERX4400371	ERR4460000	3	20200402	Illumina NovaSeq 6000	AMPLICON	PCR
ERX4400373	ERR4460002	3	20200402	Illumina NovaSeq 6000	AMPLICON	PCR
ERX4400377	ERR4460006	3	20200402	Illumina NovaSeq 6000	AMPLICON	PCR
ERX4400384	ERR4460013	3	20200402	Illumina NovaSeq 6000	AMPLICON	PCR
ERX4400388	ERR4460017	3	20200402	Illumina NovaSeq 6000	AMPLICON	PCR
ERX4400393	ERR4460022	3	20200402	Illumina NovaSeq 6000	AMPLICON	PCR
ERX4400396	ERR4460025	3	20200402	Illumina NovaSeq 6000	AMPLICON	PCR
ERX4402955	ERR4462584	3	20200402	Illumina NovaSeq 6000	AMPLICON	PCR
ERX4516659	ERR4581119	3	20200402	Illumina NovaSeq 6000	AMPLICON	PCR
ERX4516672	ERR4581132	3	20200402	Illumina NovaSeq 6000	AMPLICON	PCR
ERX4516704	ERR4581164	3	20200402	Illumina NovaSeq 6000	AMPLICON	PCR
ERX4516707	ERR4581167	3	20200402	Illumina NovaSeq 6000	AMPLICON	PCR
ERX4535980	ERR4603833	3	20200402	Illumina NovaSeq 6000	AMPLICON	PCR
ERX4536128	ERR4603981	3	20200402	Illumina NovaSeq 6000	AMPLICON	PCR
ERX4399849	ERR4459478	3	20200402	Illumina NovaSeq 6000	AMPLICON	PCR
ERX4399873	ERR4459502	3	20200402	Illumina NovaSeq 6000	AMPLICON	PCR
ERX4399951	ERR4459580	3	20200402	Illumina NovaSeq 6000	AMPLICON	PCR
ERX4400354	ERR4459983	3	20200402	Illumina NovaSeq 6000	AMPLICON	PCR
ERX4276148	ERR4329314	3	20200402	Illumina NovaSeq 6000	AMPLICON	PCR
ERX4400454	ERR4460083	3	20200402	Illumina NovaSeq 6000	AMPLICON	PCR
ERX4365267	ERR4424709	3	20200402	Illumina NovaSeq 6000	AMPLICON	PCR
ERX4400276	ERR4459905	3	20200402	Illumina NovaSeq 6000	AMPLICON	PCR
ERX4400746	ERR4460375	3	20200402	Illumina NovaSeq 6000	AMPLICON	PCR
ERX4400214	ERR4459843	3	20200402	Illumina NovaSeq 6000	AMPLICON	PCR
ERX4400106	ERR4459735	3	20200402	Illumina NovaSeq 6000	AMPLICON	PCR
ERX4363658	ERR4423100	3	20200403	Illumina NovaSeq 6000	AMPLICON	PCR
ERX4363660	ERR4423102	3	20200403	Illumina NovaSeq 6000	AMPLICON	PCR
ERX4363728	ERR4423170	3	20200403	Illumina NovaSeq 6000	AMPLICON	PCR
ERX4363808	ERR4423250	3	20200403	Illumina NovaSeq 6000	AMPLICON	PCR
ERX4363868	ERR4423310	3	20200403	Illumina NovaSeq 6000	AMPLICON	PCR
ERX4363900	ERR4423342	3	20200403	Illumina NovaSeq 6000	AMPLICON	PCR
ERX4364362	ERR4423804	3	20200403	Illumina NovaSeq 6000	AMPLICON	PCR
ERX4364463	ERR4423905	3	20200403	Illumina NovaSeq 6000	AMPLICON	PCR
ERX4364578	ERR4424020	3	20200403	Illumina NovaSeq 6000	AMPLICON	PCR
ERX4364580	ERR4424022	3	20200403	Illumina NovaSeq 6000	AMPLICON	PCR
ERX4364612	ERR4424054	3	20200403	Illumina NovaSeq 6000	AMPLICON	PCR
ERX4365145	ERR4424587	3	20200403	Illumina NovaSeq 6000	AMPLICON	PCR
ERX4378687	ERR4438184	3	20200403	Illumina NovaSeq 6000	AMPLICON	PCR
ERX4378726	ERR4438223	3	20200403	Illumina NovaSeq 6000	AMPLICON	PCR
ERX4378758	ERR4438255	3	20200403	Illumina NovaSeq 6000	AMPLICON	PCR
ERX4378771	ERR4438268	3	20200403	Illumina NovaSeq 6000	AMPLICON	PCR
ERX4378783	ERR4438280	3	20200403	Illumina NovaSeq 6000	AMPLICON	PCR
ERX4378784	ERR4438281	3	20200403	Illumina NovaSeq 6000	AMPLICON	PCR
ERX4378831	ERR4438328	3	20200403	Illumina NovaSeq 6000	AMPLICON	PCR
ERX4398442	ERR4458071	3	20200403	Illumina NovaSeq 6000	AMPLICON	PCR
ERX4399472	ERR4459101	3	20200403	Illumina NovaSeq 6000	AMPLICON	PCR
ERX4399770	ERR4459399	3	20200403	Illumina NovaSeq 6000	AMPLICON	PCR
ERX4399775	ERR4459404	3	20200403	Illumina NovaSeq 6000	AMPLICON	PCR
ERX4399777	ERR4459406	3	20200403	Illumina NovaSeq 6000	AMPLICON	PCR
ERX4399800	ERR4459429	3	20200403	Illumina NovaSeq 6000	AMPLICON	PCR
ERX4399844	ERR4459473	3	20200403	Illumina NovaSeq 6000	AMPLICON	PCR
ERX4399875	ERR4459504	3	20200403	Illumina NovaSeq 6000	AMPLICON	PCR
ERX4399885	ERR4459514	3	20200403	Illumina NovaSeq 6000	AMPLICON	PCR
ERX4399889	ERR4459518	3	20200403	Illumina NovaSeq 6000	AMPLICON	PCR
ERX4399899	ERR4459528	3	20200403	Illumina NovaSeq 6000	AMPLICON	PCR
ERX4399907	ERR4459536	3	20200403	Illumina NovaSeq 6000	AMPLICON	PCR
ERX4399914	ERR4459543	3	20200403	Illumina NovaSeq 6000	AMPLICON	PCR
ERX4399915	ERR4459544	3	20200403	Illumina NovaSeq 6000	AMPLICON	PCR
ERX4399927	ERR4459556	3	20200403	Illumina NovaSeq 6000	AMPLICON	PCR
ERX4399947	ERR4459576	3	20200403	Illumina NovaSeq 6000	AMPLICON	PCR
ERX4399962	ERR4459591	3	20200403	Illumina NovaSeq 6000	AMPLICON	PCR
ERX4399988	ERR4459617	3	20200403	Illumina NovaSeq 6000	AMPLICON	PCR
ERX4399991	ERR4459620	3	20200403	Illumina NovaSeq 6000	AMPLICON	PCR
ERX4399994	ERR4459623	3	20200403	Illumina NovaSeq 6000	AMPLICON	PCR
ERX4399997	ERR4459626	3	20200403	Illumina NovaSeq 6000	AMPLICON	PCR
ERX4400003	ERR4459632	3	20200403	Illumina NovaSeq 6000	AMPLICON	PCR
ERX4400011	ERR4459640	3	20200403	Illumina NovaSeq 6000	AMPLICON	PCR
ERX4400026	ERR4459655	3	20200403	Illumina NovaSeq 6000	AMPLICON	PCR
ERX4400032	ERR4459661	3	20200403	Illumina NovaSeq 6000	AMPLICON	PCR
ERX4400044	ERR4459673	3	20200403	Illumina NovaSeq 6000	AMPLICON	PCR
ERX4400048	ERR4459677	3	20200403	Illumina NovaSeq 6000	AMPLICON	PCR
ERX4400052	ERR4459681	3	20200403	Illumina NovaSeq 6000	AMPLICON	PCR
ERX4400053	ERR4459682	3	20200403	Illumina NovaSeq 6000	AMPLICON	PCR
ERX4400057	ERR4459686	3	20200403	Illumina NovaSeq 6000	AMPLICON	PCR
ERX4400068	ERR4459697	3	20200403	Illumina NovaSeq 6000	AMPLICON	PCR
ERX4400069	ERR4459698	3	20200403	Illumina NovaSeq 6000	AMPLICON	PCR
ERX4400075	ERR4459704	3	20200403	Illumina NovaSeq 6000	AMPLICON	PCR
ERX4400084	ERR4459713	3	20200403	Illumina NovaSeq 6000	AMPLICON	PCR
ERX4400101	ERR4459730	3	20200403	Illumina NovaSeq 6000	AMPLICON	PCR
ERX4400102	ERR4459731	3	20200403	Illumina NovaSeq 6000	AMPLICON	PCR
ERX4400118	ERR4459747	3	20200403	Illumina NovaSeq 6000	AMPLICON	PCR
ERX4400122	ERR4459751	3	20200403	Illumina NovaSeq 6000	AMPLICON	PCR
ERX4400128	ERR4459757	3	20200403	Illumina NovaSeq 6000	AMPLICON	PCR
ERX4400142	ERR4459771	3	20200403	Illumina NovaSeq 6000	AMPLICON	PCR
ERX4400147	ERR4459776	3	20200403	Illumina NovaSeq 6000	AMPLICON	PCR
ERX4400161	ERR4459790	3	20200403	Illumina NovaSeq 6000	AMPLICON	PCR
ERX4400164	ERR4459793	3	20200403	Illumina NovaSeq 6000	AMPLICON	PCR
ERX4400171	ERR4459800	3	20200403	Illumina NovaSeq 6000	AMPLICON	PCR
ERX4400172	ERR4459801	3	20200403	Illumina NovaSeq 6000	AMPLICON	PCR
ERX4400175	ERR4459804	3	20200403	Illumina NovaSeq 6000	AMPLICON	PCR
ERX4400177	ERR4459806	3	20200403	Illumina NovaSeq 6000	AMPLICON	PCR
ERX4400182	ERR4459811	3	20200403	Illumina NovaSeq 6000	AMPLICON	PCR
ERX4400186	ERR4459815	3	20200403	Illumina NovaSeq 6000	AMPLICON	PCR
ERX4400247	ERR4459876	3	20200403	Illumina NovaSeq 6000	AMPLICON	PCR
ERX4400362	ERR4459991	3	20200403	Illumina NovaSeq 6000	AMPLICON	PCR
ERX4400372	ERR4460001	3	20200403	Illumina NovaSeq 6000	AMPLICON	PCR
ERX4400385	ERR4460014	3	20200403	Illumina NovaSeq 6000	AMPLICON	PCR
ERX4400387	ERR4460016	3	20200403	Illumina NovaSeq 6000	AMPLICON	PCR
ERX4400389	ERR4460018	3	20200403	Illumina NovaSeq 6000	AMPLICON	PCR
ERX4400713	ERR4460342	3	20200403	Illumina NovaSeq 6000	AMPLICON	PCR
ERX4400773	ERR4460402	3	20200403	Illumina NovaSeq 6000	AMPLICON	PCR
ERX4400788	ERR4460417	3	20200403	Illumina NovaSeq 6000	AMPLICON	PCR
ERX4400906	ERR4460535	3	20200403	Illumina NovaSeq 6000	AMPLICON	PCR
ERX4400938	ERR4460567	3	20200403	Illumina NovaSeq 6000	AMPLICON	PCR
ERX4400969	ERR4460598	3	20200403	Illumina NovaSeq 6000	AMPLICON	PCR
ERX4401113	ERR4460742	3	20200403	Illumina NovaSeq 6000	AMPLICON	PCR
ERX4401121	ERR4460750	3	20200403	Illumina NovaSeq 6000	AMPLICON	PCR
ERX4516667	ERR4581127	3	20200403	Illumina NovaSeq 6000	AMPLICON	PCR
ERX4516673	ERR4581133	3	20200403	Illumina NovaSeq 6000	AMPLICON	PCR
ERX4516708	ERR4581168	3	20200403	Illumina NovaSeq 6000	AMPLICON	PCR
ERX4516709	ERR4581169	3	20200403	Illumina NovaSeq 6000	AMPLICON	PCR
ERX4535966	ERR4603819	3	20200403	Illumina NovaSeq 6000	AMPLICON	PCR
ERX4535989	ERR4603842	3	20200403	Illumina NovaSeq 6000	AMPLICON	PCR
ERX4536053	ERR4603906	3	20200403	Illumina NovaSeq 6000	AMPLICON	PCR
ERX4536078	ERR4603931	3	20200403	Illumina NovaSeq 6000	AMPLICON	PCR
ERX4517085	ERR4581545	3	20200403	Illumina NovaSeq 6000	AMPLICON	PCR
ERX4400076	ERR4459705	3	20200403	Illumina NovaSeq 6000	AMPLICON	PCR
ERX4400374	ERR4460003	3	20200403	Illumina NovaSeq 6000	AMPLICON	PCR
ERX4399854	ERR4459483	3	20200403	Illumina NovaSeq 6000	AMPLICON	PCR
ERX4378772	ERR4438269	3	20200403	Illumina NovaSeq 6000	AMPLICON	PCR
ERX4363787	ERR4423229	3	20200403	Illumina NovaSeq 6000	AMPLICON	PCR
ERX4516702	ERR4581162	3	20200403	Illumina NovaSeq 6000	AMPLICON	PCR
ERX4378707	ERR4438204	3	20200403	Illumina NovaSeq 6000	AMPLICON	PCR
ERX4364534	ERR4423976	3	20200403	Illumina NovaSeq 6000	AMPLICON	PCR
ERX4400265	ERR4459894	3	20200403	Illumina NovaSeq 6000	AMPLICON	PCR
ERX4363688	ERR4423130	3	20200404	Illumina NovaSeq 6000	AMPLICON	PCR
ERX4363770	ERR4423212	3	20200404	Illumina NovaSeq 6000	AMPLICON	PCR
ERX4363799	ERR4423241	3	20200404	Illumina NovaSeq 6000	AMPLICON	PCR
ERX4363806	ERR4423248	3	20200404	Illumina NovaSeq 6000	AMPLICON	PCR
ERX4363848	ERR4423290	3	20200404	Illumina NovaSeq 6000	AMPLICON	PCR
ERX4363967	ERR4423409	3	20200404	Illumina NovaSeq 6000	AMPLICON	PCR
ERX4363995	ERR4423437	3	20200404	Illumina NovaSeq 6000	AMPLICON	PCR
ERX4364742	ERR4424184	3	20200404	Illumina NovaSeq 6000	AMPLICON	PCR
ERX4364751	ERR4424193	3	20200404	Illumina NovaSeq 6000	AMPLICON	PCR
ERX4365144	ERR4424586	3	20200404	Illumina NovaSeq 6000	AMPLICON	PCR
ERX4365258	ERR4424700	3	20200404	Illumina NovaSeq 6000	AMPLICON	PCR
ERX4365272	ERR4424714	3	20200404	Illumina NovaSeq 6000	AMPLICON	PCR
ERX4377388	ERR4436885	3	20200404	Illumina NovaSeq 6000	AMPLICON	PCR
ERX4378690	ERR4438187	3	20200404	Illumina NovaSeq 6000	AMPLICON	PCR
ERX4378704	ERR4438201	3	20200404	Illumina NovaSeq 6000	AMPLICON	PCR
ERX4378732	ERR4438229	3	20200404	Illumina NovaSeq 6000	AMPLICON	PCR
ERX4378800	ERR4438297	3	20200404	Illumina NovaSeq 6000	AMPLICON	PCR
ERX4378808	ERR4438305	3	20200404	Illumina NovaSeq 6000	AMPLICON	PCR
ERX4399774	ERR4459403	3	20200404	Illumina NovaSeq 6000	AMPLICON	PCR
ERX4399776	ERR4459405	3	20200404	Illumina NovaSeq 6000	AMPLICON	PCR
ERX4399793	ERR4459422	3	20200404	Illumina NovaSeq 6000	AMPLICON	PCR
ERX4399801	ERR4459430	3	20200404	Illumina NovaSeq 6000	AMPLICON	PCR
ERX4399803	ERR4459432	3	20200404	Illumina NovaSeq 6000	AMPLICON	PCR
ERX4399813	ERR4459442	3	20200404	Illumina NovaSeq 6000	AMPLICON	PCR
ERX4399819	ERR4459448	3	20200404	Illumina NovaSeq 6000	AMPLICON	PCR
ERX4399840	ERR4459469	3	20200404	Illumina NovaSeq 6000	AMPLICON	PCR
ERX4399871	ERR4459500	3	20200404	Illumina NovaSeq 6000	AMPLICON	PCR
ERX4399901	ERR4459530	3	20200404	Illumina NovaSeq 6000	AMPLICON	PCR
ERX4399905	ERR4459534	3	20200404	Illumina NovaSeq 6000	AMPLICON	PCR
ERX4399921	ERR4459550	3	20200404	Illumina NovaSeq 6000	AMPLICON	PCR
ERX4399932	ERR4459561	3	20200404	Illumina NovaSeq 6000	AMPLICON	PCR
ERX4399934	ERR4459563	3	20200404	Illumina NovaSeq 6000	AMPLICON	PCR
ERX4399935	ERR4459564	3	20200404	Illumina NovaSeq 6000	AMPLICON	PCR
ERX4399939	ERR4459568	3	20200404	Illumina NovaSeq 6000	AMPLICON	PCR
ERX4400058	ERR4459687	3	20200404	Illumina NovaSeq 6000	AMPLICON	PCR
ERX4400179	ERR4459808	3	20200404	Illumina NovaSeq 6000	AMPLICON	PCR
ERX4400187	ERR4459816	3	20200404	Illumina NovaSeq 6000	AMPLICON	PCR
ERX4400266	ERR4459895	3	20200404	Illumina NovaSeq 6000	AMPLICON	PCR
ERX4400541	ERR4460170	3	20200404	Illumina NovaSeq 6000	AMPLICON	PCR
ERX4400547	ERR4460176	3	20200404	Illumina NovaSeq 6000	AMPLICON	PCR
ERX4400562	ERR4460191	3	20200404	Illumina NovaSeq 6000	AMPLICON	PCR
ERX4400564	ERR4460193	3	20200404	Illumina NovaSeq 6000	AMPLICON	PCR
ERX4400594	ERR4460223	3	20200404	Illumina NovaSeq 6000	AMPLICON	PCR
ERX4400658	ERR4460287	3	20200404	Illumina NovaSeq 6000	AMPLICON	PCR
ERX4400662	ERR4460291	3	20200404	Illumina NovaSeq 6000	AMPLICON	PCR
ERX4400682	ERR4460311	3	20200404	Illumina NovaSeq 6000	AMPLICON	PCR
ERX4400689	ERR4460318	3	20200404	Illumina NovaSeq 6000	AMPLICON	PCR
ERX4400694	ERR4460323	3	20200404	Illumina NovaSeq 6000	AMPLICON	PCR
ERX4400695	ERR4460324	3	20200404	Illumina NovaSeq 6000	AMPLICON	PCR
ERX4400700	ERR4460329	3	20200404	Illumina NovaSeq 6000	AMPLICON	PCR
ERX4400710	ERR4460339	3	20200404	Illumina NovaSeq 6000	AMPLICON	PCR
ERX4400717	ERR4460346	3	20200404	Illumina NovaSeq 6000	AMPLICON	PCR
ERX4400739	ERR4460368	3	20200404	Illumina NovaSeq 6000	AMPLICON	PCR
ERX4400783	ERR4460412	3	20200404	Illumina NovaSeq 6000	AMPLICON	PCR
ERX4400787	ERR4460416	3	20200404	Illumina NovaSeq 6000	AMPLICON	PCR
ERX4400791	ERR4460420	3	20200404	Illumina NovaSeq 6000	AMPLICON	PCR
ERX4400792	ERR4460421	3	20200404	Illumina NovaSeq 6000	AMPLICON	PCR
ERX4400809	ERR4460438	3	20200404	Illumina NovaSeq 6000	AMPLICON	PCR
ERX4400843	ERR4460472	3	20200404	Illumina NovaSeq 6000	AMPLICON	PCR
ERX4400860	ERR4460489	3	20200404	Illumina NovaSeq 6000	AMPLICON	PCR
ERX4400877	ERR4460506	3	20200404	Illumina NovaSeq 6000	AMPLICON	PCR
ERX4400879	ERR4460508	3	20200404	Illumina NovaSeq 6000	AMPLICON	PCR
ERX4400891	ERR4460520	3	20200404	Illumina NovaSeq 6000	AMPLICON	PCR
ERX4400903	ERR4460532	3	20200404	Illumina NovaSeq 6000	AMPLICON	PCR
ERX4400923	ERR4460552	3	20200404	Illumina NovaSeq 6000	AMPLICON	PCR
ERX4400935	ERR4460564	3	20200404	Illumina NovaSeq 6000	AMPLICON	PCR
ERX4400985	ERR4460614	3	20200404	Illumina NovaSeq 6000	AMPLICON	PCR
ERX4401088	ERR4460717	3	20200404	Illumina NovaSeq 6000	AMPLICON	PCR
ERX4401154	ERR4460783	3	20200404	Illumina NovaSeq 6000	AMPLICON	PCR
ERX4401300	ERR4460929	3	20200404	Illumina NovaSeq 6000	AMPLICON	PCR
ERX4402718	ERR4462347	3	20200404	Illumina NovaSeq 6000	AMPLICON	PCR
ERX4516542	ERR4581003	3	20200404	Illumina NovaSeq 6000	AMPLICON	PCR
ERX4516544	ERR4581005	3	20200404	Illumina NovaSeq 6000	AMPLICON	PCR
ERX4516553	ERR4581014	3	20200404	Illumina NovaSeq 6000	AMPLICON	PCR
ERX4516559	ERR4581020	3	20200404	Illumina NovaSeq 6000	AMPLICON	PCR
ERX4516581	ERR4581042	3	20200404	Illumina NovaSeq 6000	AMPLICON	PCR
ERX4516656	ERR4581116	3	20200404	Illumina NovaSeq 6000	AMPLICON	PCR
ERX4516657	ERR4581117	3	20200404	Illumina NovaSeq 6000	AMPLICON	PCR
ERX4516675	ERR4581135	3	20200404	Illumina NovaSeq 6000	AMPLICON	PCR
ERX4517083	ERR4581543	3	20200404	Illumina NovaSeq 6000	AMPLICON	PCR
ERX4517107	ERR4581567	3	20200404	Illumina NovaSeq 6000	AMPLICON	PCR
ERX4517222	ERR4581682	3	20200404	Illumina NovaSeq 6000	AMPLICON	PCR
ERX4535873	ERR4603726	3	20200404	Illumina NovaSeq 6000	AMPLICON	PCR
ERX4535974	ERR4603827	3	20200404	Illumina NovaSeq 6000	AMPLICON	PCR
ERX4535981	ERR4603834	3	20200404	Illumina NovaSeq 6000	AMPLICON	PCR
ERX4536029	ERR4603882	3	20200404	Illumina NovaSeq 6000	AMPLICON	PCR
ERX4536050	ERR4603903	3	20200404	Illumina NovaSeq 6000	AMPLICON	PCR
ERX4536064	ERR4603917	3	20200404	Illumina NovaSeq 6000	AMPLICON	PCR
ERX4536232	ERR4604085	3	20200404	Illumina NovaSeq 6000	AMPLICON	PCR
ERX4399500	ERR4459129	3	20200404	Illumina NovaSeq 6000	AMPLICON	PCR
ERX4400893	ERR4460522	3	20200404	Illumina NovaSeq 6000	AMPLICON	PCR
ERX4399855	ERR4459484	3	20200404	Illumina NovaSeq 6000	AMPLICON	PCR
ERX4363747	ERR4423189	3	20200404	Illumina NovaSeq 6000	AMPLICON	PCR
ERX4401105	ERR4460734	3	20200404	Illumina NovaSeq 6000	AMPLICON	PCR
ERX4400617	ERR4460246	3	20200404	Illumina NovaSeq 6000	AMPLICON	PCR
ERX4517071	ERR4581531	3	20200404	Illumina NovaSeq 6000	AMPLICON	PCR
ERX4535929	ERR4603782	3	20200404	Illumina NovaSeq 6000	AMPLICON	PCR
ERX4378691	ERR4438188	3	20200404	Illumina NovaSeq 6000	AMPLICON	PCR
[truncated: 94,559 more rows]

## Sheet: Supplementary Information 6
ERX ID	ERR ID	Artic primer version	Collection date	Instrument model	Library strategy	Library selection
ERX4365473	ERR4424915	3	20200301	Illumina NovaSeq 6000	AMPLICON	PCR
ERX4363947	ERR4423389	3	20200302	Illumina NovaSeq 6000	AMPLICON	PCR
ERX4363959	ERR4423401	3	20200302	Illumina NovaSeq 6000	AMPLICON	PCR
ERX4364558	ERR4424000	3	20200302	Illumina NovaSeq 6000	AMPLICON	PCR
ERX4398888	ERR4458517	3	20200302	Illumina NovaSeq 6000	AMPLICON	PCR
ERX4398891	ERR4458520	3	20200302	Illumina NovaSeq 6000	AMPLICON	PCR
ERX4398957	ERR4458586	3	20200302	Illumina NovaSeq 6000	AMPLICON	PCR
ERX4398958	ERR4458587	3	20200302	Illumina NovaSeq 6000	AMPLICON	PCR
ERX4363918	ERR4423360	3	20200303	Illumina NovaSeq 6000	AMPLICON	PCR
ERX4363962	ERR4423404	3	20200303	Illumina NovaSeq 6000	AMPLICON	PCR
ERX4364378	ERR4423820	3	20200303	Illumina NovaSeq 6000	AMPLICON	PCR
ERX4364396	ERR4423838	3	20200303	Illumina NovaSeq 6000	AMPLICON	PCR
ERX4364422	ERR4423864	3	20200303	Illumina NovaSeq 6000	AMPLICON	PCR
ERX4364464	ERR4423906	3	20200303	Illumina NovaSeq 6000	AMPLICON	PCR
ERX4364602	ERR4424044	3	20200303	Illumina NovaSeq 6000	AMPLICON	PCR
ERX4364642	ERR4424084	3	20200303	Illumina NovaSeq 6000	AMPLICON	PCR
ERX4365570	ERR4425012	3	20200303	Illumina NovaSeq 6000	AMPLICON	PCR
ERX4398932	ERR4458561	3	20200303	Illumina NovaSeq 6000	AMPLICON	PCR
ERX4398945	ERR4458574	3	20200303	Illumina NovaSeq 6000	AMPLICON	PCR
ERX4398947	ERR4458576	3	20200303	Illumina NovaSeq 6000	AMPLICON	PCR
ERX4398968	ERR4458597	3	20200303	Illumina NovaSeq 6000	AMPLICON	PCR
ERX4398982	ERR4458611	3	20200303	Illumina NovaSeq 6000	AMPLICON	PCR
ERX4398989	ERR4458618	3	20200303	Illumina NovaSeq 6000	AMPLICON	PCR
ERX4364515	ERR4423957	3	20200304	Illumina NovaSeq 6000	AMPLICON	PCR
ERX4398868	ERR4458497	3	20200304	Illumina NovaSeq 6000	AMPLICON	PCR
ERX4398922	ERR4458551	3	20200304	Illumina NovaSeq 6000	AMPLICON	PCR
ERX4398978	ERR4458607	3	20200304	Illumina NovaSeq 6000	AMPLICON	PCR
ERX4399026	ERR4458655	3	20200304	Illumina NovaSeq 6000	AMPLICON	PCR
ERX4363990	ERR4423432	3	20200305	Illumina NovaSeq 6000	AMPLICON	PCR
ERX4364524	ERR4423966	3	20200305	Illumina NovaSeq 6000	AMPLICON	PCR
ERX4364634	ERR4424076	3	20200305	Illumina NovaSeq 6000	AMPLICON	PCR
ERX4363988	ERR4423430	3	20200306	Illumina NovaSeq 6000	AMPLICON	PCR
ERX4364398	ERR4423840	3	20200306	Illumina NovaSeq 6000	AMPLICON	PCR
ERX4364433	ERR4423875	3	20200306	Illumina NovaSeq 6000	AMPLICON	PCR
ERX4364434	ERR4423876	3	20200306	Illumina NovaSeq 6000	AMPLICON	PCR
ERX4364442	ERR4423884	3	20200306	Illumina NovaSeq 6000	AMPLICON	PCR
ERX4364511	ERR4423953	3	20200306	Illumina NovaSeq 6000	AMPLICON	PCR
ERX4364551	ERR4423993	3	20200306	Illumina NovaSeq 6000	AMPLICON	PCR
ERX4364460	ERR4423902	3	20200307	Illumina NovaSeq 6000	AMPLICON	PCR
ERX4364542	ERR4423984	3	20200307	Illumina NovaSeq 6000	AMPLICON	PCR
ERX4364405	ERR4423847	3	20200308	Illumina NovaSeq 6000	AMPLICON	PCR
ERX4364496	ERR4423938	3	20200308	Illumina NovaSeq 6000	AMPLICON	PCR
ERX4398923	ERR4458552	3	20200308	Illumina NovaSeq 6000	AMPLICON	PCR
ERX4398938	ERR4458567	3	20200308	Illumina NovaSeq 6000	AMPLICON	PCR
ERX4516604	ERR4581065	3	20200308	Illumina NovaSeq 6000	AMPLICON	PCR
ERX4516614	ERR4581075	3	20200308	Illumina NovaSeq 6000	AMPLICON	PCR
ERX4363906	ERR4423348	3	20200309	Illumina NovaSeq 6000	AMPLICON	PCR
ERX4363914	ERR4423356	3	20200309	Illumina NovaSeq 6000	AMPLICON	PCR
ERX4363966	ERR4423408	3	20200309	Illumina NovaSeq 6000	AMPLICON	PCR
ERX4364536	ERR4423978	3	20200309	Illumina NovaSeq 6000	AMPLICON	PCR
ERX4398870	ERR4458499	3	20200309	Illumina NovaSeq 6000	AMPLICON	PCR
ERX4398911	ERR4458540	3	20200309	Illumina NovaSeq 6000	AMPLICON	PCR
ERX4398920	ERR4458549	3	20200309	Illumina NovaSeq 6000	AMPLICON	PCR
ERX4398943	ERR4458572	3	20200309	Illumina NovaSeq 6000	AMPLICON	PCR
ERX4398952	ERR4458581	3	20200309	Illumina NovaSeq 6000	AMPLICON	PCR
ERX4398962	ERR4458591	3	20200309	Illumina NovaSeq 6000	AMPLICON	PCR
ERX4516566	ERR4581027	3	20200309	Illumina NovaSeq 6000	AMPLICON	PCR
ERX4535923	ERR4603776	3	20200309	Illumina NovaSeq 6000	AMPLICON	PCR
ERX4535960	ERR4603813	3	20200309	Illumina NovaSeq 6000	AMPLICON	PCR
ERX4364400	ERR4423842	3	20200310	Illumina NovaSeq 6000	AMPLICON	PCR
ERX4364419	ERR4423861	3	20200310	Illumina NovaSeq 6000	AMPLICON	PCR
ERX4364491	ERR4423933	3	20200310	Illumina NovaSeq 6000	AMPLICON	PCR
ERX4364554	ERR4423996	3	20200310	Illumina NovaSeq 6000	AMPLICON	PCR
ERX4364601	ERR4424043	3	20200310	Illumina NovaSeq 6000	AMPLICON	PCR
ERX4364638	ERR4424080	3	20200310	Illumina NovaSeq 6000	AMPLICON	PCR
ERX4364773	ERR4424215	3	20200310	Illumina NovaSeq 6000	AMPLICON	PCR
ERX4365610	ERR4425052	3	20200310	Illumina NovaSeq 6000	AMPLICON	PCR
ERX4379344	ERR4438841	3	20200310	Illumina NovaSeq 6000	AMPLICON	PCR
ERX4398983	ERR4458612	3	20200310	Illumina NovaSeq 6000	AMPLICON	PCR
ERX4516560	ERR4581021	3	20200310	Illumina NovaSeq 6000	AMPLICON	PCR
ERX4516570	ERR4581031	3	20200310	Illumina NovaSeq 6000	AMPLICON	PCR
ERX4516575	ERR4581036	3	20200310	Illumina NovaSeq 6000	AMPLICON	PCR
ERX4516583	ERR4581044	3	20200310	Illumina NovaSeq 6000	AMPLICON	PCR
ERX4516641	ERR4581101	3	20200310	Illumina NovaSeq 6000	AMPLICON	PCR
ERX4536222	ERR4604075	3	20200310	Illumina NovaSeq 6000	AMPLICON	PCR
ERX4364366	ERR4423808	3	20200311	Illumina NovaSeq 6000	AMPLICON	PCR
ERX4364375	ERR4423817	3	20200311	Illumina NovaSeq 6000	AMPLICON	PCR
ERX4364377	ERR4423819	3	20200311	Illumina NovaSeq 6000	AMPLICON	PCR
ERX4364472	ERR4423914	3	20200311	Illumina NovaSeq 6000	AMPLICON	PCR
ERX4364543	ERR4423985	3	20200311	Illumina NovaSeq 6000	AMPLICON	PCR
ERX4364623	ERR4424065	3	20200311	Illumina NovaSeq 6000	AMPLICON	PCR
ERX4364843	ERR4424285	3	20200311	Illumina NovaSeq 6000	AMPLICON	PCR
ERX4364923	ERR4424365	3	20200311	Illumina NovaSeq 6000	AMPLICON	PCR
ERX4365524	ERR4424966	3	20200311	Illumina NovaSeq 6000	AMPLICON	PCR
ERX4398924	ERR4458553	3	20200311	Illumina NovaSeq 6000	AMPLICON	PCR
ERX4398949	ERR4458578	3	20200311	Illumina NovaSeq 6000	AMPLICON	PCR
ERX4398954	ERR4458583	3	20200311	Illumina NovaSeq 6000	AMPLICON	PCR
ERX4516558	ERR4581019	3	20200311	Illumina NovaSeq 6000	AMPLICON	PCR
ERX4516574	ERR4581035	3	20200311	Illumina NovaSeq 6000	AMPLICON	PCR
ERX4363624	ERR4423066	3	20200312	Illumina NovaSeq 6000	AMPLICON	PCR
ERX4363895	ERR4423337	3	20200312	Illumina NovaSeq 6000	AMPLICON	PCR
ERX4363922	ERR4423364	3	20200312	Illumina NovaSeq 6000	AMPLICON	PCR
ERX4363929	ERR4423371	3	20200312	Illumina NovaSeq 6000	AMPLICON	PCR
ERX4363965	ERR4423407	3	20200312	Illumina NovaSeq 6000	AMPLICON	PCR
ERX4364670	ERR4424112	3	20200312	Illumina NovaSeq 6000	AMPLICON	PCR
ERX4364745	ERR4424187	3	20200312	Illumina NovaSeq 6000	AMPLICON	PCR
ERX4364783	ERR4424225	3	20200312	Illumina NovaSeq 6000	AMPLICON	PCR
ERX4364852	ERR4424294	3	20200312	Illumina NovaSeq 6000	AMPLICON	PCR
ERX4364879	ERR4424321	3	20200312	Illumina NovaSeq 6000	AMPLICON	PCR
ERX4365551	ERR4424993	3	20200312	Illumina NovaSeq 6000	AMPLICON	PCR
ERX4379337	ERR4438834	3	20200312	Illumina NovaSeq 6000	AMPLICON	PCR
ERX4379346	ERR4438843	3	20200312	Illumina NovaSeq 6000	AMPLICON	PCR
ERX4398758	ERR4458387	3	20200312	Illumina NovaSeq 6000	AMPLICON	PCR
ERX4398762	ERR4458391	3	20200312	Illumina NovaSeq 6000	AMPLICON	PCR
ERX4398809	ERR4458438	3	20200312	Illumina NovaSeq 6000	AMPLICON	PCR
ERX4398845	ERR4458474	3	20200312	Illumina NovaSeq 6000	AMPLICON	PCR
ERX4398861	ERR4458490	3	20200312	Illumina NovaSeq 6000	AMPLICON	PCR
ERX4398890	ERR4458519	3	20200312	Illumina NovaSeq 6000	AMPLICON	PCR
ERX4516642	ERR4581102	3	20200312	Illumina NovaSeq 6000	AMPLICON	PCR
ERX4535964	ERR4603817	3	20200312	Illumina NovaSeq 6000	AMPLICON	PCR
ERX4536235	ERR4604088	3	20200312	Illumina NovaSeq 6000	AMPLICON	PCR
ERX4536240	ERR4604093	3	20200312	Illumina NovaSeq 6000	AMPLICON	PCR
ERX4363916	ERR4423358	3	20200313	Illumina NovaSeq 6000	AMPLICON	PCR
ERX4363950	ERR4423392	3	20200313	Illumina NovaSeq 6000	AMPLICON	PCR
ERX4363979	ERR4423421	3	20200313	Illumina NovaSeq 6000	AMPLICON	PCR
ERX4363993	ERR4423435	3	20200313	Illumina NovaSeq 6000	AMPLICON	PCR
ERX4364455	ERR4423897	3	20200313	Illumina NovaSeq 6000	AMPLICON	PCR
ERX4364727	ERR4424169	3	20200313	Illumina NovaSeq 6000	AMPLICON	PCR
ERX4364792	ERR4424234	3	20200313	Illumina NovaSeq 6000	AMPLICON	PCR
ERX4364803	ERR4424245	3	20200313	Illumina NovaSeq 6000	AMPLICON	PCR
ERX4364855	ERR4424297	3	20200313	Illumina NovaSeq 6000	AMPLICON	PCR
ERX4364905	ERR4424347	3	20200313	Illumina NovaSeq 6000	AMPLICON	PCR
ERX4364912	ERR4424354	3	20200313	Illumina NovaSeq 6000	AMPLICON	PCR
ERX4364917	ERR4424359	3	20200313	Illumina NovaSeq 6000	AMPLICON	PCR
ERX4365386	ERR4424828	3	20200313	Illumina NovaSeq 6000	AMPLICON	PCR
ERX4365491	ERR4424933	3	20200313	Illumina NovaSeq 6000	AMPLICON	PCR
ERX4398773	ERR4458402	3	20200313	Illumina NovaSeq 6000	AMPLICON	PCR
ERX4398778	ERR4458407	3	20200313	Illumina NovaSeq 6000	AMPLICON	PCR
ERX4398789	ERR4458418	3	20200313	Illumina NovaSeq 6000	AMPLICON	PCR
ERX4398792	ERR4458421	3	20200313	Illumina NovaSeq 6000	AMPLICON	PCR
ERX4398797	ERR4458426	3	20200313	Illumina NovaSeq 6000	AMPLICON	PCR
ERX4398804	ERR4458433	3	20200313	Illumina NovaSeq 6000	AMPLICON	PCR
ERX4398811	ERR4458440	3	20200313	Illumina NovaSeq 6000	AMPLICON	PCR
ERX4398815	ERR4458444	3	20200313	Illumina NovaSeq 6000	AMPLICON	PCR
ERX4398825	ERR4458454	3	20200313	Illumina NovaSeq 6000	AMPLICON	PCR
ERX4398834	ERR4458463	3	20200313	Illumina NovaSeq 6000	AMPLICON	PCR
ERX4398875	ERR4458504	3	20200313	Illumina NovaSeq 6000	AMPLICON	PCR
ERX4398955	ERR4458584	3	20200313	Illumina NovaSeq 6000	AMPLICON	PCR
ERX4398985	ERR4458614	3	20200313	Illumina NovaSeq 6000	AMPLICON	PCR
ERX4398995	ERR4458624	3	20200313	Illumina NovaSeq 6000	AMPLICON	PCR
ERX4399003	ERR4458632	3	20200313	Illumina NovaSeq 6000	AMPLICON	PCR
ERX4399006	ERR4458635	3	20200313	Illumina NovaSeq 6000	AMPLICON	PCR
ERX4399020	ERR4458649	3	20200313	Illumina NovaSeq 6000	AMPLICON	PCR
ERX4399128	ERR4458757	3	20200313	Illumina NovaSeq 6000	AMPLICON	PCR
ERX4516598	ERR4581059	3	20200313	Illumina NovaSeq 6000	AMPLICON	PCR
ERX4516623	ERR4581084	3	20200313	Illumina NovaSeq 6000	AMPLICON	PCR
ERX4363169	ERR4422611	3	20200314	Illumina NovaSeq 6000	AMPLICON	PCR
ERX4363766	ERR4423208	3	20200314	Illumina NovaSeq 6000	AMPLICON	PCR
ERX4363928	ERR4423370	3	20200314	Illumina NovaSeq 6000	AMPLICON	PCR
ERX4363985	ERR4423427	3	20200314	Illumina NovaSeq 6000	AMPLICON	PCR
ERX4364680	ERR4424122	3	20200314	Illumina NovaSeq 6000	AMPLICON	PCR
ERX4364715	ERR4424157	3	20200314	Illumina NovaSeq 6000	AMPLICON	PCR
ERX4364763	ERR4424205	3	20200314	Illumina NovaSeq 6000	AMPLICON	PCR
ERX4364793	ERR4424235	3	20200314	Illumina NovaSeq 6000	AMPLICON	PCR
ERX4379363	ERR4438860	3	20200314	Illumina NovaSeq 6000	AMPLICON	PCR
ERX4379405	ERR4438902	3	20200314	Illumina NovaSeq 6000	AMPLICON	PCR
ERX4398764	ERR4458393	3	20200314	Illumina NovaSeq 6000	AMPLICON	PCR
ERX4398765	ERR4458394	3	20200314	Illumina NovaSeq 6000	AMPLICON	PCR
ERX4398767	ERR4458396	3	20200314	Illumina NovaSeq 6000	AMPLICON	PCR
ERX4398788	ERR4458417	3	20200314	Illumina NovaSeq 6000	AMPLICON	PCR
ERX4398796	ERR4458425	3	20200314	Illumina NovaSeq 6000	AMPLICON	PCR
ERX4398806	ERR4458435	3	20200314	Illumina NovaSeq 6000	AMPLICON	PCR
ERX4398807	ERR4458436	3	20200314	Illumina NovaSeq 6000	AMPLICON	PCR
ERX4398820	ERR4458449	3	20200314	Illumina NovaSeq 6000	AMPLICON	PCR
ERX4398844	ERR4458473	3	20200314	Illumina NovaSeq 6000	AMPLICON	PCR
ERX4398894	ERR4458523	3	20200314	Illumina NovaSeq 6000	AMPLICON	PCR
ERX4398896	ERR4458525	3	20200314	Illumina NovaSeq 6000	AMPLICON	PCR
ERX4398906	ERR4458535	3	20200314	Illumina NovaSeq 6000	AMPLICON	PCR
ERX4399008	ERR4458637	3	20200314	Illumina NovaSeq 6000	AMPLICON	PCR
ERX4399009	ERR4458638	3	20200314	Illumina NovaSeq 6000	AMPLICON	PCR
ERX4399032	ERR4458661	3	20200314	Illumina NovaSeq 6000	AMPLICON	PCR
ERX4516612	ERR4581073	3	20200314	Illumina NovaSeq 6000	AMPLICON	PCR
ERX4516613	ERR4581074	3	20200314	Illumina NovaSeq 6000	AMPLICON	PCR
ERX4516694	ERR4581154	3	20200314	Illumina NovaSeq 6000	AMPLICON	PCR
ERX4535940	ERR4603793	3	20200314	Illumina NovaSeq 6000	AMPLICON	PCR
ERX4536211	ERR4604064	3	20200314	Illumina NovaSeq 6000	AMPLICON	PCR
ERX4363786	ERR4423228	3	20200315	Illumina NovaSeq 6000	AMPLICON	PCR
ERX4363865	ERR4423307	3	20200315	Illumina NovaSeq 6000	AMPLICON	PCR
ERX4363907	ERR4423349	3	20200315	Illumina NovaSeq 6000	AMPLICON	PCR
ERX4363945	ERR4423387	3	20200315	Illumina NovaSeq 6000	AMPLICON	PCR
ERX4363956	ERR4423398	3	20200315	Illumina NovaSeq 6000	AMPLICON	PCR
ERX4363960	ERR4423402	3	20200315	Illumina NovaSeq 6000	AMPLICON	PCR
ERX4398759	ERR4458388	3	20200315	Illumina NovaSeq 6000	AMPLICON	PCR
ERX4398787	ERR4458416	3	20200315	Illumina NovaSeq 6000	AMPLICON	PCR
ERX4398808	ERR4458437	3	20200315	Illumina NovaSeq 6000	AMPLICON	PCR
ERX4398816	ERR4458445	3	20200315	Illumina NovaSeq 6000	AMPLICON	PCR
ERX4398839	ERR4458468	3	20200315	Illumina NovaSeq 6000	AMPLICON	PCR
ERX4398846	ERR4458475	3	20200315	Illumina NovaSeq 6000	AMPLICON	PCR
ERX4398855	ERR4458484	3	20200315	Illumina NovaSeq 6000	AMPLICON	PCR
ERX4398873	ERR4458502	3	20200315	Illumina NovaSeq 6000	AMPLICON	PCR
ERX4398909	ERR4458538	3	20200315	Illumina NovaSeq 6000	AMPLICON	PCR
ERX4398929	ERR4458558	3	20200315	Illumina NovaSeq 6000	AMPLICON	PCR
ERX4398933	ERR4458562	3	20200315	Illumina NovaSeq 6000	AMPLICON	PCR
ERX4398981	ERR4458610	3	20200315	Illumina NovaSeq 6000	AMPLICON	PCR
ERX4516594	ERR4581055	3	20200315	Illumina NovaSeq 6000	AMPLICON	PCR
ERX4516596	ERR4581057	3	20200315	Illumina NovaSeq 6000	AMPLICON	PCR
ERX4516615	ERR4581076	3	20200315	Illumina NovaSeq 6000	AMPLICON	PCR
ERX4516616	ERR4581077	3	20200315	Illumina NovaSeq 6000	AMPLICON	PCR
ERX4516617	ERR4581078	3	20200315	Illumina NovaSeq 6000	AMPLICON	PCR
ERX4516634	ERR4581094	3	20200315	Illumina NovaSeq 6000	AMPLICON	PCR
ERX4516636	ERR4581096	3	20200315	Illumina NovaSeq 6000	AMPLICON	PCR
ERX4363643	ERR4423085	3	20200316	Illumina NovaSeq 6000	AMPLICON	PCR
ERX4363908	ERR4423350	3	20200316	Illumina NovaSeq 6000	AMPLICON	PCR
ERX4363925	ERR4423367	3	20200316	Illumina NovaSeq 6000	AMPLICON	PCR
ERX4363930	ERR4423372	3	20200316	Illumina NovaSeq 6000	AMPLICON	PCR
ERX4363937	ERR4423379	3	20200316	Illumina NovaSeq 6000	AMPLICON	PCR
ERX4363944	ERR4423386	3	20200316	Illumina NovaSeq 6000	AMPLICON	PCR
ERX4364704	ERR4424146	3	20200316	Illumina NovaSeq 6000	AMPLICON	PCR
ERX4364712	ERR4424154	3	20200316	Illumina NovaSeq 6000	AMPLICON	PCR
ERX4364836	ERR4424278	3	20200316	Illumina NovaSeq 6000	AMPLICON	PCR
ERX4398763	ERR4458392	3	20200316	Illumina NovaSeq 6000	AMPLICON	PCR
ERX4398766	ERR4458395	3	20200316	Illumina NovaSeq 6000	AMPLICON	PCR
ERX4398768	ERR4458397	3	20200316	Illumina NovaSeq 6000	AMPLICON	PCR
ERX4398771	ERR4458400	3	20200316	Illumina NovaSeq 6000	AMPLICON	PCR
ERX4398777	ERR4458406	3	20200316	Illumina NovaSeq 6000	AMPLICON	PCR
ERX4398791	ERR4458420	3	20200316	Illumina NovaSeq 6000	AMPLICON	PCR
ERX4398793	ERR4458422	3	20200316	Illumina NovaSeq 6000	AMPLICON	PCR
ERX4398795	ERR4458424	3	20200316	Illumina NovaSeq 6000	AMPLICON	PCR
ERX4398818	ERR4458447	3	20200316	Illumina NovaSeq 6000	AMPLICON	PCR
ERX4398819	ERR4458448	3	20200316	Illumina NovaSeq 6000	AMPLICON	PCR
ERX4398841	ERR4458470	3	20200316	Illumina NovaSeq 6000	AMPLICON	PCR
ERX4398858	ERR4458487	3	20200316	Illumina NovaSeq 6000	AMPLICON	PCR
ERX4398859	ERR4458488	3	20200316	Illumina NovaSeq 6000	AMPLICON	PCR
ERX4398860	ERR4458489	3	20200316	Illumina NovaSeq 6000	AMPLICON	PCR
ERX4398869	ERR4458498	3	20200316	Illumina NovaSeq 6000	AMPLICON	PCR
ERX4398884	ERR4458513	3	20200316	Illumina NovaSeq 6000	AMPLICON	PCR
ERX4398902	ERR4458531	3	20200316	Illumina NovaSeq 6000	AMPLICON	PCR
ERX4398948	ERR4458577	3	20200316	Illumina NovaSeq 6000	AMPLICON	PCR
ERX4398953	ERR4458582	3	20200316	Illumina NovaSeq 6000	AMPLICON	PCR
ERX4516551	ERR4581012	3	20200316	Illumina NovaSeq 6000	AMPLICON	PCR
ERX4516562	ERR4581023	3	20200316	Illumina NovaSeq 6000	AMPLICON	PCR
ERX4516587	ERR4581048	3	20200316	Illumina NovaSeq 6000	AMPLICON	PCR
ERX4516608	ERR4581069	3	20200316	Illumina NovaSeq 6000	AMPLICON	PCR
ERX4516619	ERR4581080	3	20200316	Illumina NovaSeq 6000	AMPLICON	PCR
ERX4516627	ERR4581088	3	20200316	Illumina NovaSeq 6000	AMPLICON	PCR
ERX4516628	ERR4581089	3	20200316	Illumina NovaSeq 6000	AMPLICON	PCR
ERX4516631	ERR4581092	3	20200316	Illumina NovaSeq 6000	AMPLICON	PCR
ERX4516639	ERR4581099	3	20200316	Illumina NovaSeq 6000	AMPLICON	PCR
ERX4516693	ERR4581153	3	20200316	Illumina NovaSeq 6000	AMPLICON	PCR
ERX4363746	ERR4423188	3	20200317	Illumina NovaSeq 6000	AMPLICON	PCR
ERX4363902	ERR4423344	3	20200317	Illumina NovaSeq 6000	AMPLICON	PCR
ERX4363924	ERR4423366	3	20200317	Illumina NovaSeq 6000	AMPLICON	PCR
ERX4363932	ERR4423374	3	20200317	Illumina NovaSeq 6000	AMPLICON	PCR
ERX4363951	ERR4423393	3	20200317	Illumina NovaSeq 6000	AMPLICON	PCR
ERX4363968	ERR4423410	3	20200317	Illumina NovaSeq 6000	AMPLICON	PCR
ERX4364778	ERR4424220	3	20200317	Illumina NovaSeq 6000	AMPLICON	PCR
ERX4378079	ERR4437576	3	20200317	Illumina NovaSeq 6000	AMPLICON	PCR
ERX4378083	ERR4437580	3	20200317	Illumina NovaSeq 6000	AMPLICON	PCR
ERX4398760	ERR4458389	3	20200317	Illumina NovaSeq 6000	AMPLICON	PCR
ERX4398770	ERR4458399	3	20200317	Illumina NovaSeq 6000	AMPLICON	PCR
ERX4398779	ERR4458408	3	20200317	Illumina NovaSeq 6000	AMPLICON	PCR
ERX4398780	ERR4458409	3	20200317	Illumina NovaSeq 6000	AMPLICON	PCR
ERX4398783	ERR4458412	3	20200317	Illumina NovaSeq 6000	AMPLICON	PCR
ERX4398784	ERR4458413	3	20200317	Illumina NovaSeq 6000	AMPLICON	PCR
ERX4398794	ERR4458423	3	20200317	Illumina NovaSeq 6000	AMPLICON	PCR
ERX4398799	ERR4458428	3	20200317	Illumina NovaSeq 6000	AMPLICON	PCR
ERX4398810	ERR4458439	3	20200317	Illumina NovaSeq 6000	AMPLICON	PCR
ERX4398832	ERR4458461	3	20200317	Illumina NovaSeq 6000	AMPLICON	PCR
ERX4398847	ERR4458476	3	20200317	Illumina NovaSeq 6000	AMPLICON	PCR
ERX4398848	ERR4458477	3	20200317	Illumina NovaSeq 6000	AMPLICON	PCR
ERX4398849	ERR4458478	3	20200317	Illumina NovaSeq 6000	AMPLICON	PCR
ERX4398851	ERR4458480	3	20200317	Illumina NovaSeq 6000	AMPLICON	PCR
ERX4398882	ERR4458511	3	20200317	Illumina NovaSeq 6000	AMPLICON	PCR
ERX4398899	ERR4458528	3	20200317	Illumina NovaSeq 6000	AMPLICON	PCR
ERX4398931	ERR4458560	3	20200317	Illumina NovaSeq 6000	AMPLICON	PCR
ERX4398934	ERR4458563	3	20200317	Illumina NovaSeq 6000	AMPLICON	PCR
ERX4398939	ERR4458568	3	20200317	Illumina NovaSeq 6000	AMPLICON	PCR
ERX4398965	ERR4458594	3	20200317	Illumina NovaSeq 6000	AMPLICON	PCR
ERX4398966	ERR4458595	3	20200317	Illumina NovaSeq 6000	AMPLICON	PCR
ERX4398975	ERR4458604	3	20200317	Illumina NovaSeq 6000	AMPLICON	PCR
ERX4399000	ERR4458629	3	20200317	Illumina NovaSeq 6000	AMPLICON	PCR
ERX4399011	ERR4458640	3	20200317	Illumina NovaSeq 6000	AMPLICON	PCR
ERX4399185	ERR4458814	3	20200317	Illumina NovaSeq 6000	AMPLICON	PCR
ERX4399192	ERR4458821	3	20200317	Illumina NovaSeq 6000	AMPLICON	PCR
ERX4403466	ERR4463095	3	20200317	Illumina NovaSeq 6000	AMPLICON	PCR
ERX4403470	ERR4463099	3	20200317	Illumina NovaSeq 6000	AMPLICON	PCR
ERX4403475	ERR4463104	3	20200317	Illumina NovaSeq 6000	AMPLICON	PCR
ERX4516541	ERR4581002	3	20200317	Illumina NovaSeq 6000	AMPLICON	PCR
ERX4516545	ERR4581006	3	20200317	Illumina NovaSeq 6000	AMPLICON	PCR
ERX4516547	ERR4581008	3	20200317	Illumina NovaSeq 6000	AMPLICON	PCR
ERX4516554	ERR4581015	3	20200317	Illumina NovaSeq 6000	AMPLICON	PCR
ERX4516556	ERR4581017	3	20200317	Illumina NovaSeq 6000	AMPLICON	PCR
ERX4516557	ERR4581018	3	20200317	Illumina NovaSeq 6000	AMPLICON	PCR
ERX4516569	ERR4581030	3	20200317	Illumina NovaSeq 6000	AMPLICON	PCR
ERX4516578	ERR4581039	3	20200317	Illumina NovaSeq 6000	AMPLICON	PCR
ERX4516590	ERR4581051	3	20200317	Illumina NovaSeq 6000	AMPLICON	PCR
ERX4516591	ERR4581052	3	20200317	Illumina NovaSeq 6000	AMPLICON	PCR
ERX4516592	ERR4581053	3	20200317	Illumina NovaSeq 6000	AMPLICON	PCR
ERX4535956	ERR4603809	3	20200317	Illumina NovaSeq 6000	AMPLICON	PCR
ERX4536212	ERR4604065	3	20200317	Illumina NovaSeq 6000	AMPLICON	PCR
ERX4363666	ERR4423108	3	20200318	Illumina NovaSeq 6000	AMPLICON	PCR
ERX4363699	ERR4423141	3	20200318	Illumina NovaSeq 6000	AMPLICON	PCR
ERX4363915	ERR4423357	3	20200318	Illumina NovaSeq 6000	AMPLICON	PCR
ERX4363920	ERR4423362	3	20200318	Illumina NovaSeq 6000	AMPLICON	PCR
ERX4363953	ERR4423395	3	20200318	Illumina NovaSeq 6000	AMPLICON	PCR
ERX4363958	ERR4423400	3	20200318	Illumina NovaSeq 6000	AMPLICON	PCR
ERX4363964	ERR4423406	3	20200318	Illumina NovaSeq 6000	AMPLICON	PCR
ERX4363977	ERR4423419	3	20200318	Illumina NovaSeq 6000	AMPLICON	PCR
ERX4363982	ERR4423424	3	20200318	Illumina NovaSeq 6000	AMPLICON	PCR
ERX4363987	ERR4423429	3	20200318	Illumina NovaSeq 6000	AMPLICON	PCR
ERX4378008	ERR4437505	3	20200318	Illumina NovaSeq 6000	AMPLICON	PCR
ERX4378012	ERR4437509	3	20200318	Illumina NovaSeq 6000	AMPLICON	PCR
ERX4378047	ERR4437544	3	20200318	Illumina NovaSeq 6000	AMPLICON	PCR
ERX4398785	ERR4458414	3	20200318	Illumina NovaSeq 6000	AMPLICON	PCR
ERX4398801	ERR4458430	3	20200318	Illumina NovaSeq 6000	AMPLICON	PCR
ERX4398812	ERR4458441	3	20200318	Illumina NovaSeq 6000	AMPLICON	PCR
ERX4398822	ERR4458451	3	20200318	Illumina NovaSeq 6000	AMPLICON	PCR
ERX4398856	ERR4458485	3	20200318	Illumina NovaSeq 6000	AMPLICON	PCR
ERX4398864	ERR4458493	3	20200318	Illumina NovaSeq 6000	AMPLICON	PCR
ERX4398867	ERR4458496	3	20200318	Illumina NovaSeq 6000	AMPLICON	PCR
ERX4398872	ERR4458501	3	20200318	Illumina NovaSeq 6000	AMPLICON	PCR
ERX4398881	ERR4458510	3	20200318	Illumina NovaSeq 6000	AMPLICON	PCR
ERX4398908	ERR4458537	3	20200318	Illumina NovaSeq 6000	AMPLICON	PCR
ERX4398927	ERR4458556	3	20200318	Illumina NovaSeq 6000	AMPLICON	PCR
ERX4398937	ERR4458566	3	20200318	Illumina NovaSeq 6000	AMPLICON	PCR
ERX4398951	ERR4458580	3	20200318	Illumina NovaSeq 6000	AMPLICON	PCR
ERX4398974	ERR4458603	3	20200318	Illumina NovaSeq 6000	AMPLICON	PCR
ERX4398976	ERR4458605	3	20200318	Illumina NovaSeq 6000	AMPLICON	PCR
ERX4398984	ERR4458613	3	20200318	Illumina NovaSeq 6000	AMPLICON	PCR
ERX4398986	ERR4458615	3	20200318	Illumina NovaSeq 6000	AMPLICON	PCR
ERX4398988	ERR4458617	3	20200318	Illumina NovaSeq 6000	AMPLICON	PCR
ERX4399007	ERR4458636	3	20200318	Illumina NovaSeq 6000	AMPLICON	PCR
ERX4399010	ERR4458639	3	20200318	Illumina NovaSeq 6000	AMPLICON	PCR
ERX4399022	ERR4458651	3	20200318	Illumina NovaSeq 6000	AMPLICON	PCR
ERX4399025	ERR4458654	3	20200318	Illumina NovaSeq 6000	AMPLICON	PCR
ERX4399033	ERR4458662	3	20200318	Illumina NovaSeq 6000	AMPLICON	PCR
ERX4399089	ERR4458718	3	20200318	Illumina NovaSeq 6000	AMPLICON	PCR
ERX4399122	ERR4458751	3	20200318	Illumina NovaSeq 6000	AMPLICON	PCR
ERX4399206	ERR4458835	3	20200318	Illumina NovaSeq 6000	AMPLICON	PCR
ERX4403442	ERR4463071	3	20200318	Illumina NovaSeq 6000	AMPLICON	PCR
ERX4403447	ERR4463076	3	20200318	Illumina NovaSeq 6000	AMPLICON	PCR
ERX4403454	ERR4463083	3	20200318	Illumina NovaSeq 6000	AMPLICON	PCR
ERX4403457	ERR4463086	3	20200318	Illumina NovaSeq 6000	AMPLICON	PCR
ERX4403460	ERR4463089	3	20200318	Illumina NovaSeq 6000	AMPLICON	PCR
ERX4403469	ERR4463098	3	20200318	Illumina NovaSeq 6000	AMPLICON	PCR
ERX4403471	ERR4463100	3	20200318	Illumina NovaSeq 6000	AMPLICON	PCR
ERX4403478	ERR4463107	3	20200318	Illumina NovaSeq 6000	AMPLICON	PCR
ERX4403481	ERR4463110	3	20200318	Illumina NovaSeq 6000	AMPLICON	PCR
ERX4403482	ERR4463111	3	20200318	Illumina NovaSeq 6000	AMPLICON	PCR
ERX4403490	ERR4463119	3	20200318	Illumina NovaSeq 6000	AMPLICON	PCR
ERX4403494	ERR4463123	3	20200318	Illumina NovaSeq 6000	AMPLICON	PCR
ERX4403497	ERR4463126	3	20200318	Illumina NovaSeq 6000	AMPLICON	PCR
ERX4403499	ERR4463128	3	20200318	Illumina NovaSeq 6000	AMPLICON	PCR
ERX4403509	ERR4463138	3	20200318	Illumina NovaSeq 6000	AMPLICON	PCR
ERX4403511	ERR4463140	3	20200318	Illumina NovaSeq 6000	AMPLICON	PCR
ERX4516549	ERR4581010	3	20200318	Illumina NovaSeq 6000	AMPLICON	PCR
ERX4516555	ERR4581016	3	20200318	Illumina NovaSeq 6000	AMPLICON	PCR
ERX4516564	ERR4581025	3	20200318	Illumina NovaSeq 6000	AMPLICON	PCR
ERX4516601	ERR4581062	3	20200318	Illumina NovaSeq 6000	AMPLICON	PCR
ERX4516632	ERR4581093	3	20200318	Illumina NovaSeq 6000	AMPLICON	PCR
ERX4535924	ERR4603777	3	20200318	Illumina NovaSeq 6000	AMPLICON	PCR
ERX4363678	ERR4423120	3	20200319	Illumina NovaSeq 6000	AMPLICON	PCR
ERX4363685	ERR4423127	3	20200319	Illumina NovaSeq 6000	AMPLICON	PCR
ERX4363712	ERR4423154	3	20200319	Illumina NovaSeq 6000	AMPLICON	PCR
ERX4363730	ERR4423172	3	20200319	Illumina NovaSeq 6000	AMPLICON	PCR
ERX4363831	ERR4423273	3	20200319	Illumina NovaSeq 6000	AMPLICON	PCR
ERX4363921	ERR4423363	3	20200319	Illumina NovaSeq 6000	AMPLICON	PCR
ERX4363923	ERR4423365	3	20200319	Illumina NovaSeq 6000	AMPLICON	PCR
ERX4363948	ERR4423390	3	20200319	Illumina NovaSeq 6000	AMPLICON	PCR
ERX4363980	ERR4423422	3	20200319	Illumina NovaSeq 6000	AMPLICON	PCR
ERX4363983	ERR4423425	3	20200319	Illumina NovaSeq 6000	AMPLICON	PCR
ERX4363992	ERR4423434	3	20200319	Illumina NovaSeq 6000	AMPLICON	PCR
ERX4365310	ERR4424752	3	20200319	Illumina NovaSeq 6000	AMPLICON	PCR
ERX4378005	ERR4437502	3	20200319	Illumina NovaSeq 6000	AMPLICON	PCR
ERX4378033	ERR4437530	3	20200319	Illumina NovaSeq 6000	AMPLICON	PCR
ERX4378086	ERR4437583	3	20200319	Illumina NovaSeq 6000	AMPLICON	PCR
ERX4398757	ERR4458386	3	20200319	Illumina NovaSeq 6000	AMPLICON	PCR
ERX4398857	ERR4458486	3	20200319	Illumina NovaSeq 6000	AMPLICON	PCR
ERX4398901	ERR4458530	3	20200319	Illumina NovaSeq 6000	AMPLICON	PCR
ERX4398960	ERR4458589	3	20200319	Illumina NovaSeq 6000	AMPLICON	PCR
ERX4398969	ERR4458598	3	20200319	Illumina NovaSeq 6000	AMPLICON	PCR
ERX4399062	ERR4458691	3	20200319	Illumina NovaSeq 6000	AMPLICON	PCR
ERX4399066	ERR4458695	3	20200319	Illumina NovaSeq 6000	AMPLICON	PCR
ERX4399069	ERR4458698	3	20200319	Illumina NovaSeq 6000	AMPLICON	PCR
ERX4399099	ERR4458728	3	20200319	Illumina NovaSeq 6000	AMPLICON	PCR
ERX4399111	ERR4458740	3	20200319	Illumina NovaSeq 6000	AMPLICON	PCR
ERX4399116	ERR4458745	3	20200319	Illumina NovaSeq 6000	AMPLICON	PCR
ERX4399119	ERR4458748	3	20200319	Illumina NovaSeq 6000	AMPLICON	PCR
ERX4399124	ERR4458753	3	20200319	Illumina NovaSeq 6000	AMPLICON	PCR
ERX4399155	ERR4458784	3	20200319	Illumina NovaSeq 6000	AMPLICON	PCR
ERX4399156	ERR4458785	3	20200319	Illumina NovaSeq 6000	AMPLICON	PCR
ERX4399179	ERR4458808	3	20200319	Illumina NovaSeq 6000	AMPLICON	PCR
ERX4399180	ERR4458809	3	20200319	Illumina NovaSeq 6000	AMPLICON	PCR
ERX4399187	ERR4458816	3	20200319	Illumina NovaSeq 6000	AMPLICON	PCR
ERX4399190	ERR4458819	3	20200319	Illumina NovaSeq 6000	AMPLICON	PCR
ERX4399211	ERR4458840	3	20200319	Illumina NovaSeq 6000	AMPLICON	PCR
ERX4403441	ERR4463070	3	20200319	Illumina NovaSeq 6000	AMPLICON	PCR
ERX4403443	ERR4463072	3	20200319	Illumina NovaSeq 6000	AMPLICON	PCR
ERX4403444	ERR4463073	3	20200319	Illumina NovaSeq 6000	AMPLICON	PCR
ERX4403445	ERR4463074	3	20200319	Illumina NovaSeq 6000	AMPLICON	PCR
ERX4403446	ERR4463075	3	20200319	Illumina NovaSeq 6000	AMPLICON	PCR
ERX4403448	ERR4463077	3	20200319	Illumina NovaSeq 6000	AMPLICON	PCR
ERX4403452	ERR4463081	3	20200319	Illumina NovaSeq 6000	AMPLICON	PCR
ERX4403455	ERR4463084	3	20200319	Illumina NovaSeq 6000	AMPLICON	PCR
ERX4403462	ERR4463091	3	20200319	Illumina NovaSeq 6000	AMPLICON	PCR
ERX4403463	ERR4463092	3	20200319	Illumina NovaSeq 6000	AMPLICON	PCR
ERX4403472	ERR4463101	3	20200319	Illumina NovaSeq 6000	AMPLICON	PCR
ERX4403476	ERR4463105	3	20200319	Illumina NovaSeq 6000	AMPLICON	PCR
ERX4403480	ERR4463109	3	20200319	Illumina NovaSeq 6000	AMPLICON	PCR
ERX4403484	ERR4463113	3	20200319	Illumina NovaSeq 6000	AMPLICON	PCR
ERX4403485	ERR4463114	3	20200319	Illumina NovaSeq 6000	AMPLICON	PCR
ERX4403486	ERR4463115	3	20200319	Illumina NovaSeq 6000	AMPLICON	PCR
ERX4403489	ERR4463118	3	20200319	Illumina NovaSeq 6000	AMPLICON	PCR
ERX4403491	ERR4463120	3	20200319	Illumina NovaSeq 6000	AMPLICON	PCR
ERX4403493	ERR4463122	3	20200319	Illumina NovaSeq 6000	AMPLICON	PCR
ERX4403495	ERR4463124	3	20200319	Illumina NovaSeq 6000	AMPLICON	PCR
ERX4403496	ERR4463125	3	20200319	Illumina NovaSeq 6000	AMPLICON	PCR
ERX4403498	ERR4463127	3	20200319	Illumina NovaSeq 6000	AMPLICON	PCR
ERX4403500	ERR4463129	3	20200319	Illumina NovaSeq 6000	AMPLICON	PCR
ERX4403502	ERR4463131	3	20200319	Illumina NovaSeq 6000	AMPLICON	PCR
ERX4403508	ERR4463137	3	20200319	Illumina NovaSeq 6000	AMPLICON	PCR
ERX4403513	ERR4463142	3	20200319	Illumina NovaSeq 6000	AMPLICON	PCR
ERX4403514	ERR4463143	3	20200319	Illumina NovaSeq 6000	AMPLICON	PCR
ERX4516572	ERR4581033	3	20200319	Illumina NovaSeq 6000	AMPLICON	PCR
ERX4516580	ERR4581041	3	20200319	Illumina NovaSeq 6000	AMPLICON	PCR
ERX4516618	ERR4581079	3	20200319	Illumina NovaSeq 6000	AMPLICON	PCR
ERX4363151	ERR4422593	3	20200320	Illumina NovaSeq 6000	AMPLICON	PCR
ERX4363160	ERR4422602	3	20200320	Illumina NovaSeq 6000	AMPLICON	PCR
ERX4363738	ERR4423180	3	20200320	Illumina NovaSeq 6000	AMPLICON	PCR
ERX4363758	ERR4423200	3	20200320	Illumina NovaSeq 6000	AMPLICON	PCR
ERX4363832	ERR4423274	3	20200320	Illumina NovaSeq 6000	AMPLICON	PCR
ERX4363901	ERR4423343	3	20200320	Illumina NovaSeq 6000	AMPLICON	PCR
ERX4363910	ERR4423352	3	20200320	Illumina NovaSeq 6000	AMPLICON	PCR
ERX4363913	ERR4423355	3	20200320	Illumina NovaSeq 6000	AMPLICON	PCR
ERX4363927	ERR4423369	3	20200320	Illumina NovaSeq 6000	AMPLICON	PCR
ERX4363942	ERR4423384	3	20200320	Illumina NovaSeq 6000	AMPLICON	PCR
ERX4363952	ERR4423394	3	20200320	Illumina NovaSeq 6000	AMPLICON	PCR
ERX4363957	ERR4423399	3	20200320	Illumina NovaSeq 6000	AMPLICON	PCR
ERX4363963	ERR4423405	3	20200320	Illumina NovaSeq 6000	AMPLICON	PCR
ERX4363969	ERR4423411	3	20200320	Illumina NovaSeq 6000	AMPLICON	PCR
ERX4377958	ERR4437455	3	20200320	Illumina NovaSeq 6000	AMPLICON	PCR
ERX4377964	ERR4437461	3	20200320	Illumina NovaSeq 6000	AMPLICON	PCR
ERX4377978	ERR4437475	3	20200320	Illumina NovaSeq 6000	AMPLICON	PCR
ERX4377994	ERR4437491	3	20200320	Illumina NovaSeq 6000	AMPLICON	PCR
ERX4378013	ERR4437510	3	20200320	Illumina NovaSeq 6000	AMPLICON	PCR
ERX4378025	ERR4437522	3	20200320	Illumina NovaSeq 6000	AMPLICON	PCR
ERX4378026	ERR4437523	3	20200320	Illumina NovaSeq 6000	AMPLICON	PCR
ERX4378030	ERR4437527	3	20200320	Illumina NovaSeq 6000	AMPLICON	PCR
ERX4398880	ERR4458509	3	20200320	Illumina NovaSeq 6000	AMPLICON	PCR
ERX4398898	ERR4458527	3	20200320	Illumina NovaSeq 6000	AMPLICON	PCR
ERX4398914	ERR4458543	3	20200320	Illumina NovaSeq 6000	AMPLICON	PCR
ERX4398930	ERR4458559	3	20200320	Illumina NovaSeq 6000	AMPLICON	PCR
ERX4398961	ERR4458590	3	20200320	Illumina NovaSeq 6000	AMPLICON	PCR
ERX4398967	ERR4458596	3	20200320	Illumina NovaSeq 6000	AMPLICON	PCR
ERX4399018	ERR4458647	3	20200320	Illumina NovaSeq 6000	AMPLICON	PCR
ERX4399023	ERR4458652	3	20200320	Illumina NovaSeq 6000	AMPLICON	PCR
ERX4399051	ERR4458680	3	20200320	Illumina NovaSeq 6000	AMPLICON	PCR
ERX4399055	ERR4458684	3	20200320	Illumina NovaSeq 6000	AMPLICON	PCR
ERX4399057	ERR4458686	3	20200320	Illumina NovaSeq 6000	AMPLICON	PCR
ERX4399064	ERR4458693	3	20200320	Illumina NovaSeq 6000	AMPLICON	PCR
ERX4399067	ERR4458696	3	20200320	Illumina NovaSeq 6000	AMPLICON	PCR
ERX4399071	ERR4458700	3	20200320	Illumina NovaSeq 6000	AMPLICON	PCR
ERX4399075	ERR4458704	3	20200320	Illumina NovaSeq 6000	AMPLICON	PCR
ERX4399080	ERR4458709	3	20200320	Illumina NovaSeq 6000	AMPLICON	PCR
ERX4399096	ERR4458725	3	20200320	Illumina NovaSeq 6000	AMPLICON	PCR
ERX4399097	ERR4458726	3	20200320	Illumina NovaSeq 6000	AMPLICON	PCR
ERX4399103	ERR4458732	3	20200320	Illumina NovaSeq 6000	AMPLICON	PCR
ERX4399107	ERR4458736	3	20200320	Illumina NovaSeq 6000	AMPLICON	PCR
ERX4399109	ERR4458738	3	20200320	Illumina NovaSeq 6000	AMPLICON	PCR
ERX4399123	ERR4458752	3	20200320	Illumina NovaSeq 6000	AMPLICON	PCR
ERX4399145	ERR4458774	3	20200320	Illumina NovaSeq 6000	AMPLICON	PCR
ERX4399151	ERR4458780	3	20200320	Illumina NovaSeq 6000	AMPLICON	PCR
ERX4399152	ERR4458781	3	20200320	Illumina NovaSeq 6000	AMPLICON	PCR
ERX4399158	ERR4458787	3	20200320	Illumina NovaSeq 6000	AMPLICON	PCR
ERX4399182	ERR4458811	3	20200320	Illumina NovaSeq 6000	AMPLICON	PCR
ERX4399189	ERR4458818	3	20200320	Illumina NovaSeq 6000	AMPLICON	PCR
ERX4399191	ERR4458820	3	20200320	Illumina NovaSeq 6000	AMPLICON	PCR
ERX4399193	ERR4458822	3	20200320	Illumina NovaSeq 6000	AMPLICON	PCR
ERX4399198	ERR4458827	3	20200320	Illumina NovaSeq 6000	AMPLICON	PCR
ERX4399200	ERR4458829	3	20200320	Illumina NovaSeq 6000	AMPLICON	PCR
ERX4399202	ERR4458831	3	20200320	Illumina NovaSeq 6000	AMPLICON	PCR
ERX4402907	ERR4462536	3	20200320	Illumina NovaSeq 6000	AMPLICON	PCR
ERX4402922	ERR4462551	3	20200320	Illumina NovaSeq 6000	AMPLICON	PCR
ERX4403449	ERR4463078	3	20200320	Illumina NovaSeq 6000	AMPLICON	PCR
ERX4403450	ERR4463079	3	20200320	Illumina NovaSeq 6000	AMPLICON	PCR
ERX4403451	ERR4463080	3	20200320	Illumina NovaSeq 6000	AMPLICON	PCR
ERX4403453	ERR4463082	3	20200320	Illumina NovaSeq 6000	AMPLICON	PCR
ERX4403458	ERR4463087	3	20200320	Illumina NovaSeq 6000	AMPLICON	PCR
ERX4403459	ERR4463088	3	20200320	Illumina NovaSeq 6000	AMPLICON	PCR
ERX4403461	ERR4463090	3	20200320	Illumina NovaSeq 6000	AMPLICON	PCR
ERX4403464	ERR4463093	3	20200320	Illumina NovaSeq 6000	AMPLICON	PCR
ERX4403465	ERR4463094	3	20200320	Illumina NovaSeq 6000	AMPLICON	PCR
ERX4403468	ERR4463097	3	20200320	Illumina NovaSeq 6000	AMPLICON	PCR
ERX4403473	ERR4463102	3	20200320	Illumina NovaSeq 6000	AMPLICON	PCR
ERX4403474	ERR4463103	3	20200320	Illumina NovaSeq 6000	AMPLICON	PCR
ERX4403477	ERR4463106	3	20200320	Illumina NovaSeq 6000	AMPLICON	PCR
ERX4403479	ERR4463108	3	20200320	Illumina NovaSeq 6000	AMPLICON	PCR
ERX4403483	ERR4463112	3	20200320	Illumina NovaSeq 6000	AMPLICON	PCR
ERX4403487	ERR4463116	3	20200320	Illumina NovaSeq 6000	AMPLICON	PCR
ERX4403488	ERR4463117	3	20200320	Illumina NovaSeq 6000	AMPLICON	PCR
ERX4403492	ERR4463121	3	20200320	Illumina NovaSeq 6000	AMPLICON	PCR
ERX4403503	ERR4463132	3	20200320	Illumina NovaSeq 6000	AMPLICON	PCR
ERX4403504	ERR4463133	3	20200320	Illumina NovaSeq 6000	AMPLICON	PCR
ERX4403505	ERR4463134	3	20200320	Illumina NovaSeq 6000	AMPLICON	PCR
ERX4403507	ERR4463136	3	20200320	Illumina NovaSeq 6000	AMPLICON	PCR
ERX4403510	ERR4463139	3	20200320	Illumina NovaSeq 6000	AMPLICON	PCR
ERX4403512	ERR4463141	3	20200320	Illumina NovaSeq 6000	AMPLICON	PCR
ERX4535934	ERR4603787	3	20200320	Illumina NovaSeq 6000	AMPLICON	PCR
ERX4536093	ERR4603946	3	20200320	Illumina NovaSeq 6000	AMPLICON	PCR
ERX4363141	ERR4422583	3	20200321	Illumina NovaSeq 6000	AMPLICON	PCR
ERX4363178	ERR4422620	3	20200321	Illumina NovaSeq 6000	AMPLICON	PCR
ERX4363677	ERR4423119	3	20200321	Illumina NovaSeq 6000	AMPLICON	PCR
ERX4363839	ERR4423281	3	20200321	Illumina NovaSeq 6000	AMPLICON	PCR
ERX4363872	ERR4423314	3	20200321	Illumina NovaSeq 6000	AMPLICON	PCR
ERX4363887	ERR4423329	3	20200321	Illumina NovaSeq 6000	AMPLICON	PCR
ERX4363931	ERR4423373	3	20200321	Illumina NovaSeq 6000	AMPLICON	PCR
ERX4363935	ERR4423377	3	20200321	Illumina NovaSeq 6000	AMPLICON	PCR
ERX4363936	ERR4423378	3	20200321	Illumina NovaSeq 6000	AMPLICON	PCR
ERX4363946	ERR4423388	3	20200321	Illumina NovaSeq 6000	AMPLICON	PCR
ERX4363970	ERR4423412	3	20200321	Illumina NovaSeq 6000	AMPLICON	PCR
ERX4363971	ERR4423413	3	20200321	Illumina NovaSeq 6000	AMPLICON	PCR
ERX4363973	ERR4423415	3	20200321	Illumina NovaSeq 6000	AMPLICON	PCR
ERX4363975	ERR4423417	3	20200321	Illumina NovaSeq 6000	AMPLICON	PCR
ERX4363981	ERR4423423	3	20200321	Illumina NovaSeq 6000	AMPLICON	PCR
ERX4377966	ERR4437463	3	20200321	Illumina NovaSeq 6000	AMPLICON	PCR
ERX4377975	ERR4437472	3	20200321	Illumina NovaSeq 6000	AMPLICON	PCR
ERX4377983	ERR4437480	3	20200321	Illumina NovaSeq 6000	AMPLICON	PCR
ERX4378018	ERR4437515	3	20200321	Illumina NovaSeq 6000	AMPLICON	PCR
ERX4378031	ERR4437528	3	20200321	Illumina NovaSeq 6000	AMPLICON	PCR
ERX4378055	ERR4437552	3	20200321	Illumina NovaSeq 6000	AMPLICON	PCR
ERX4378061	ERR4437558	3	20200321	Illumina NovaSeq 6000	AMPLICON	PCR
ERX4378073	ERR4437570	3	20200321	Illumina NovaSeq 6000	AMPLICON	PCR
ERX4379373	ERR4438870	3	20200321	Illumina NovaSeq 6000	AMPLICON	PCR
ERX4379374	ERR4438871	3	20200321	Illumina NovaSeq 6000	AMPLICON	PCR
ERX4379387	ERR4438884	3	20200321	Illumina NovaSeq 6000	AMPLICON	PCR
ERX4379398	ERR4438895	3	20200321	Illumina NovaSeq 6000	AMPLICON	PCR
ERX4398876	ERR4458505	3	20200321	Illumina NovaSeq 6000	AMPLICON	PCR
ERX4398877	ERR4458506	3	20200321	Illumina NovaSeq 6000	AMPLICON	PCR
ERX4398879	ERR4458508	3	20200321	Illumina NovaSeq 6000	AMPLICON	PCR
ERX4398885	ERR4458514	3	20200321	Illumina NovaSeq 6000	AMPLICON	PCR
ERX4398893	ERR4458522	3	20200321	Illumina NovaSeq 6000	AMPLICON	PCR
ERX4398900	ERR4458529	3	20200321	Illumina NovaSeq 6000	AMPLICON	PCR
ERX4398903	ERR4458532	3	20200321	Illumina NovaSeq 6000	AMPLICON	PCR
ERX4398904	ERR4458533	3	20200321	Illumina NovaSeq 6000	AMPLICON	PCR
ERX4398910	ERR4458539	3	20200321	Illumina NovaSeq 6000	AMPLICON	PCR
ERX4398916	ERR4458545	3	20200321	Illumina NovaSeq 6000	AMPLICON	PCR
ERX4398919	ERR4458548	3	20200321	Illumina NovaSeq 6000	AMPLICON	PCR
ERX4398926	ERR4458555	3	20200321	Illumina NovaSeq 6000	AMPLICON	PCR
ERX4398936	ERR4458565	3	20200321	Illumina NovaSeq 6000	AMPLICON	PCR
ERX4398940	ERR4458569	3	20200321	Illumina NovaSeq 6000	AMPLICON	PCR
ERX4398956	ERR4458585	3	20200321	Illumina NovaSeq 6000	AMPLICON	PCR
ERX4398972	ERR4458601	3	20200321	Illumina NovaSeq 6000	AMPLICON	PCR
ERX4398973	ERR4458602	3	20200321	Illumina NovaSeq 6000	AMPLICON	PCR
ERX4398990	ERR4458619	3	20200321	Illumina NovaSeq 6000	AMPLICON	PCR
ERX4398991	ERR4458620	3	20200321	Illumina NovaSeq 6000	AMPLICON	PCR
ERX4398996	ERR4458625	3	20200321	Illumina NovaSeq 6000	AMPLICON	PCR
ERX4398998	ERR4458627	3	20200321	Illumina NovaSeq 6000	AMPLICON	PCR
ERX4399001	ERR4458630	3	20200321	Illumina NovaSeq 6000	AMPLICON	PCR
ERX4399012	ERR4458641	3	20200321	Illumina NovaSeq 6000	AMPLICON	PCR
ERX4399015	ERR4458644	3	20200321	Illumina NovaSeq 6000	AMPLICON	PCR
ERX4399016	ERR4458645	3	20200321	Illumina NovaSeq 6000	AMPLICON	PCR
ERX4399021	ERR4458650	3	20200321	Illumina NovaSeq 6000	AMPLICON	PCR
ERX4399027	ERR4458656	3	20200321	Illumina NovaSeq 6000	AMPLICON	PCR
ERX4399031	ERR4458660	3	20200321	Illumina NovaSeq 6000	AMPLICON	PCR
ERX4399035	ERR4458664	3	20200321	Illumina NovaSeq 6000	AMPLICON	PCR
ERX4399048	ERR4458677	3	20200321	Illumina NovaSeq 6000	AMPLICON	PCR
ERX4399049	ERR4458678	3	20200321	Illumina NovaSeq 6000	AMPLICON	PCR
ERX4399050	ERR4458679	3	20200321	Illumina NovaSeq 6000	AMPLICON	PCR
ERX4399056	ERR4458685	3	20200321	Illumina NovaSeq 6000	AMPLICON	PCR
ERX4399063	ERR4458692	3	20200321	Illumina NovaSeq 6000	AMPLICON	PCR
ERX4399070	ERR4458699	3	20200321	Illumina NovaSeq 6000	AMPLICON	PCR
ERX4399083	ERR4458712	3	20200321	Illumina NovaSeq 6000	AMPLICON	PCR
ERX4399084	ERR4458713	3	20200321	Illumina NovaSeq 6000	AMPLICON	PCR
ERX4399087	ERR4458716	3	20200321	Illumina NovaSeq 6000	AMPLICON	PCR
ERX4399088	ERR4458717	3	20200321	Illumina NovaSeq 6000	AMPLICON	PCR
ERX4399091	ERR4458720	3	20200321	Illumina NovaSeq 6000	AMPLICON	PCR
ERX4399106	ERR4458735	3	20200321	Illumina NovaSeq 6000	AMPLICON	PCR
ERX4399115	ERR4458744	3	20200321	Illumina NovaSeq 6000	AMPLICON	PCR
ERX4399126	ERR4458755	3	20200321	Illumina NovaSeq 6000	AMPLICON	PCR
ERX4399127	ERR4458756	3	20200321	Illumina NovaSeq 6000	AMPLICON	PCR
ERX4399129	ERR4458758	3	20200321	Illumina NovaSeq 6000	AMPLICON	PCR
ERX4399138	ERR4458767	3	20200321	Illumina NovaSeq 6000	AMPLICON	PCR
ERX4399139	ERR4458768	3	20200321	Illumina NovaSeq 6000	AMPLICON	PCR
ERX4399141	ERR4458770	3	20200321	Illumina NovaSeq 6000	AMPLICON	PCR
ERX4399146	ERR4458775	3	20200321	Illumina NovaSeq 6000	AMPLICON	PCR
ERX4399147	ERR4458776	3	20200321	Illumina NovaSeq 6000	AMPLICON	PCR
ERX4399165	ERR4458794	3	20200321	Illumina NovaSeq 6000	AMPLICON	PCR
ERX4399171	ERR4458800	3	20200321	Illumina NovaSeq 6000	AMPLICON	PCR
ERX4399173	ERR4458802	3	20200321	Illumina NovaSeq 6000	AMPLICON	PCR
ERX4399195	ERR4458824	3	20200321	Illumina NovaSeq 6000	AMPLICON	PCR
ERX4399196	ERR4458825	3	20200321	Illumina NovaSeq 6000	AMPLICON	PCR
ERX4399204	ERR4458833	3	20200321	Illumina NovaSeq 6000	AMPLICON	PCR
ERX4399212	ERR4458841	3	20200321	Illumina NovaSeq 6000	AMPLICON	PCR
ERX4399238	ERR4458867	3	20200321	Illumina NovaSeq 6000	AMPLICON	PCR
ERX4399290	ERR4458919	3	20200321	Illumina NovaSeq 6000	AMPLICON	PCR
ERX4399436	ERR4459065	3	20200321	Illumina NovaSeq 6000	AMPLICON	PCR
ERX4402368	ERR4461997	3	20200321	Illumina NovaSeq 6000	AMPLICON	PCR
ERX4402492	ERR4462121	3	20200321	Illumina NovaSeq 6000	AMPLICON	PCR
ERX4402575	ERR4462204	3	20200321	Illumina NovaSeq 6000	AMPLICON	PCR
ERX4403501	ERR4463130	3	20200321	Illumina NovaSeq 6000	AMPLICON	PCR
ERX4399175	ERR4458804	3	20200321	Illumina NovaSeq 6000	AMPLICON	PCR
ERX4363991	ERR4423433	3	20200321	Illumina NovaSeq 6000	AMPLICON	PCR
ERX4399305	ERR4458934	3	20200321	Illumina NovaSeq 6000	AMPLICON	PCR
ERX4398941	ERR4458570	3	20200321	Illumina NovaSeq 6000	AMPLICON	PCR
ERX4399078	ERR4458707	3	20200321	Illumina NovaSeq 6000	AMPLICON	PCR
ERX4398980	ERR4458609	3	20200321	Illumina NovaSeq 6000	AMPLICON	PCR
ERX4399167	ERR4458796	3	20200321	Illumina NovaSeq 6000	AMPLICON	PCR
ERX4399090	ERR4458719	3	20200321	Illumina NovaSeq 6000	AMPLICON	PCR
ERX4398979	ERR4458608	3	20200321	Illumina NovaSeq 6000	AMPLICON	PCR
ERX4363119	ERR4422561	3	20200322	Illumina NovaSeq 6000	AMPLICON	PCR
ERX4363648	ERR4423090	3	20200322	Illumina NovaSeq 6000	AMPLICON	PCR
ERX4363905	ERR4423347	3	20200322	Illumina NovaSeq 6000	AMPLICON	PCR
ERX4363917	ERR4423359	3	20200322	Illumina NovaSeq 6000	AMPLICON	PCR
ERX4363972	ERR4423414	3	20200322	Illumina NovaSeq 6000	AMPLICON	PCR
ERX4364779	ERR4424221	3	20200322	Illumina NovaSeq 6000	AMPLICON	PCR
ERX4364808	ERR4424250	3	20200322	Illumina NovaSeq 6000	AMPLICON	PCR
ERX4377961	ERR4437458	3	20200322	Illumina NovaSeq 6000	AMPLICON	PCR
ERX4377963	ERR4437460	3	20200322	Illumina NovaSeq 6000	AMPLICON	PCR
ERX4377968	ERR4437465	3	20200322	Illumina NovaSeq 6000	AMPLICON	PCR
ERX4378014	ERR4437511	3	20200322	Illumina NovaSeq 6000	AMPLICON	PCR
ERX4378029	ERR4437526	3	20200322	Illumina NovaSeq 6000	AMPLICON	PCR
ERX4378038	ERR4437535	3	20200322	Illumina NovaSeq 6000	AMPLICON	PCR
ERX4378057	ERR4437554	3	20200322	Illumina NovaSeq 6000	AMPLICON	PCR
ERX4378072	ERR4437569	3	20200322	Illumina NovaSeq 6000	AMPLICON	PCR
ERX4378081	ERR4437578	3	20200322	Illumina NovaSeq 6000	AMPLICON	PCR
ERX4378084	ERR4437581	3	20200322	Illumina NovaSeq 6000	AMPLICON	PCR
ERX4379385	ERR4438882	3	20200322	Illumina NovaSeq 6000	AMPLICON	PCR
ERX4398865	ERR4458494	3	20200322	Illumina NovaSeq 6000	AMPLICON	PCR
ERX4398866	ERR4458495	3	20200322	Illumina NovaSeq 6000	AMPLICON	PCR
ERX4398871	ERR4458500	3	20200322	Illumina NovaSeq 6000	AMPLICON	PCR
ERX4398883	ERR4458512	3	20200322	Illumina NovaSeq 6000	AMPLICON	PCR
ERX4398886	ERR4458515	3	20200322	Illumina NovaSeq 6000	AMPLICON	PCR
ERX4398895	ERR4458524	3	20200322	Illumina NovaSeq 6000	AMPLICON	PCR
ERX4398897	ERR4458526	3	20200322	Illumina NovaSeq 6000	AMPLICON	PCR
ERX4398905	ERR4458534	3	20200322	Illumina NovaSeq 6000	AMPLICON	PCR
ERX4398915	ERR4458544	3	20200322	Illumina NovaSeq 6000	AMPLICON	PCR
ERX4398917	ERR4458546	3	20200322	Illumina NovaSeq 6000	AMPLICON	PCR
ERX4398921	ERR4458550	3	20200322	Illumina NovaSeq 6000	AMPLICON	PCR
ERX4398928	ERR4458557	3	20200322	Illumina NovaSeq 6000	AMPLICON	PCR
ERX4398935	ERR4458564	3	20200322	Illumina NovaSeq 6000	AMPLICON	PCR
ERX4398942	ERR4458571	3	20200322	Illumina NovaSeq 6000	AMPLICON	PCR
ERX4398950	ERR4458579	3	20200322	Illumina NovaSeq 6000	AMPLICON	PCR
ERX4398964	ERR4458593	3	20200322	Illumina NovaSeq 6000	AMPLICON	PCR
ERX4398992	ERR4458621	3	20200322	Illumina NovaSeq 6000	AMPLICON	PCR
ERX4398993	ERR4458622	3	20200322	Illumina NovaSeq 6000	AMPLICON	PCR
ERX4398994	ERR4458623	3	20200322	Illumina NovaSeq 6000	AMPLICON	PCR
ERX4398999	ERR4458628	3	20200322	Illumina NovaSeq 6000	AMPLICON	PCR
ERX4399005	ERR4458634	3	20200322	Illumina NovaSeq 6000	AMPLICON	PCR
ERX4399013	ERR4458642	3	20200322	Illumina NovaSeq 6000	AMPLICON	PCR
ERX4399014	ERR4458643	3	20200322	Illumina NovaSeq 6000	AMPLICON	PCR
ERX4399040	ERR4458669	3	20200322	Illumina NovaSeq 6000	AMPLICON	PCR
ERX4399044	ERR4458673	3	20200322	Illumina NovaSeq 6000	AMPLICON	PCR
ERX4399045	ERR4458674	3	20200322	Illumina NovaSeq 6000	AMPLICON	PCR
ERX4399046	ERR4458675	3	20200322	Illumina NovaSeq 6000	AMPLICON	PCR
ERX4399047	ERR4458676	3	20200322	Illumina NovaSeq 6000	AMPLICON	PCR
ERX4399058	ERR4458687	3	20200322	Illumina NovaSeq 6000	AMPLICON	PCR
ERX4399065	ERR4458694	3	20200322	Illumina NovaSeq 6000	AMPLICON	PCR
ERX4399068	ERR4458697	3	20200322	Illumina NovaSeq 6000	AMPLICON	PCR
ERX4399073	ERR4458702	3	20200322	Illumina NovaSeq 6000	AMPLICON	PCR
ERX4399077	ERR4458706	3	20200322	Illumina NovaSeq 6000	AMPLICON	PCR
ERX4399079	ERR4458708	3	20200322	Illumina NovaSeq 6000	AMPLICON	PCR
ERX4399082	ERR4458711	3	20200322	Illumina NovaSeq 6000	AMPLICON	PCR
ERX4399085	ERR4458714	3	20200322	Illumina NovaSeq 6000	AMPLICON	PCR
ERX4399093	ERR4458722	3	20200322	Illumina NovaSeq 6000	AMPLICON	PCR
ERX4399101	ERR4458730	3	20200322	Illumina NovaSeq 6000	AMPLICON	PCR
ERX4399114	ERR4458743	3	20200322	Illumina NovaSeq 6000	AMPLICON	PCR
ERX4399131	ERR4458760	3	20200322	Illumina NovaSeq 6000	AMPLICON	PCR
ERX4399132	ERR4458761	3	20200322	Illumina NovaSeq 6000	AMPLICON	PCR
ERX4399133	ERR4458762	3	20200322	Illumina NovaSeq 6000	AMPLICON	PCR
ERX4399134	ERR4458763	3	20200322	Illumina NovaSeq 6000	AMPLICON	PCR
ERX4399135	ERR4458764	3	20200322	Illumina NovaSeq 6000	AMPLICON	PCR
ERX4399137	ERR4458766	3	20200322	Illumina NovaSeq 6000	AMPLICON	PCR
ERX4399149	ERR4458778	3	20200322	Illumina NovaSeq 6000	AMPLICON	PCR
ERX4399164	ERR4458793	3	20200322	Illumina NovaSeq 6000	AMPLICON	PCR
ERX4399170	ERR4458799	3	20200322	Illumina NovaSeq 6000	AMPLICON	PCR
ERX4399178	ERR4458807	3	20200322	Illumina NovaSeq 6000	AMPLICON	PCR
ERX4399186	ERR4458815	3	20200322	Illumina NovaSeq 6000	AMPLICON	PCR
ERX4399188	ERR4458817	3	20200322	Illumina NovaSeq 6000	AMPLICON	PCR
ERX4399203	ERR4458832	3	20200322	Illumina NovaSeq 6000	AMPLICON	PCR
ERX4399205	ERR4458834	3	20200322	Illumina NovaSeq 6000	AMPLICON	PCR
ERX4399214	ERR4458843	3	20200322	Illumina NovaSeq 6000	AMPLICON	PCR
ERX4399273	ERR4458902	3	20200322	Illumina NovaSeq 6000	AMPLICON	PCR
ERX4399284	ERR4458913	3	20200322	Illumina NovaSeq 6000	AMPLICON	PCR
ERX4399296	ERR4458925	3	20200322	Illumina NovaSeq 6000	AMPLICON	PCR
ERX4399329	ERR4458958	3	20200322	Illumina NovaSeq 6000	AMPLICON	PCR
ERX4399357	ERR4458986	3	20200322	Illumina NovaSeq 6000	AMPLICON	PCR
ERX4399412	ERR4459041	3	20200322	Illumina NovaSeq 6000	AMPLICON	PCR
ERX4399439	ERR4459068	3	20200322	Illumina NovaSeq 6000	AMPLICON	PCR
ERX4402350	ERR4461979	3	20200322	Illumina NovaSeq 6000	AMPLICON	PCR
ERX4402355	ERR4461984	3	20200322	Illumina NovaSeq 6000	AMPLICON	PCR
ERX4402872	ERR4462501	3	20200322	Illumina NovaSeq 6000	AMPLICON	PCR
ERX4402914	ERR4462543	3	20200322	Illumina NovaSeq 6000	AMPLICON	PCR
ERX4402952	ERR4462581	3	20200322	Illumina NovaSeq 6000	AMPLICON	PCR
ERX4535928	ERR4603781	3	20200322	Illumina NovaSeq 6000	AMPLICON	PCR
ERX4535954	ERR4603807	3	20200322	Illumina NovaSeq 6000	AMPLICON	PCR
ERX4536218	ERR4604071	3	20200322	Illumina NovaSeq 6000	AMPLICON	PCR
ERX4399052	ERR4458681	3	20200322	Illumina NovaSeq 6000	AMPLICON	PCR
ERX4398907	ERR4458536	3	20200322	Illumina NovaSeq 6000	AMPLICON	PCR
ERX4398913	ERR4458542	3	20200322	Illumina NovaSeq 6000	AMPLICON	PCR
ERX4399207	ERR4458836	3	20200322	Illumina NovaSeq 6000	AMPLICON	PCR
ERX4536308	ERR4604161	3	20200322	Illumina NovaSeq 6000	AMPLICON	PCR
ERX4399117	ERR4458746	3	20200322	Illumina NovaSeq 6000	AMPLICON	PCR
ERX4363825	ERR4423267	3	20200322	Illumina NovaSeq 6000	AMPLICON	PCR
ERX4399142	ERR4458771	3	20200322	Illumina NovaSeq 6000	AMPLICON	PCR
ERX4378085	ERR4437582	3	20200322	Illumina NovaSeq 6000	AMPLICON	PCR
ERX4363984	ERR4423426	3	20200322	Illumina NovaSeq 6000	AMPLICON	PCR
ERX4378051	ERR4437548	3	20200322	Illumina NovaSeq 6000	AMPLICON	PCR
ERX4398918	ERR4458547	3	20200322	Illumina NovaSeq 6000	AMPLICON	PCR
ERX4399029	ERR4458658	3	20200322	Illumina NovaSeq 6000	AMPLICON	PCR
ERX4363668	ERR4423110	3	20200323	Illumina NovaSeq 6000	AMPLICON	PCR
ERX4363859	ERR4423301	3	20200323	Illumina NovaSeq 6000	AMPLICON	PCR
ERX4363911	ERR4423353	3	20200323	Illumina NovaSeq 6000	AMPLICON	PCR
ERX4363949	ERR4423391	3	20200323	Illumina NovaSeq 6000	AMPLICON	PCR
ERX4363961	ERR4423403	3	20200323	Illumina NovaSeq 6000	AMPLICON	PCR
ERX4364672	ERR4424114	3	20200323	Illumina NovaSeq 6000	AMPLICON	PCR
ERX4364689	ERR4424131	3	20200323	Illumina NovaSeq 6000	AMPLICON	PCR
ERX4364867	ERR4424309	3	20200323	Illumina NovaSeq 6000	AMPLICON	PCR
ERX4365122	ERR4424564	3	20200323	Illumina NovaSeq 6000	AMPLICON	PCR
ERX4365213	ERR4424655	3	20200323	Illumina NovaSeq 6000	AMPLICON	PCR
ERX4365327	ERR4424769	3	20200323	Illumina NovaSeq 6000	AMPLICON	PCR
ERX4377974	ERR4437471	3	20200323	Illumina NovaSeq 6000	AMPLICON	PCR
ERX4377988	ERR4437485	3	20200323	Illumina NovaSeq 6000	AMPLICON	PCR
ERX4378000	ERR4437497	3	20200323	Illumina NovaSeq 6000	AMPLICON	PCR
ERX4378039	ERR4437536	3	20200323	Illumina NovaSeq 6000	AMPLICON	PCR
ERX4378043	ERR4437540	3	20200323	Illumina NovaSeq 6000	AMPLICON	PCR
ERX4378071	ERR4437568	3	20200323	Illumina NovaSeq 6000	AMPLICON	PCR
ERX4378078	ERR4437575	3	20200323	Illumina NovaSeq 6000	AMPLICON	PCR
ERX4379351	ERR4438848	3	20200323	Illumina NovaSeq 6000	AMPLICON	PCR
ERX4379362	ERR4438859	3	20200323	Illumina NovaSeq 6000	AMPLICON	PCR
ERX4379372	ERR4438869	3	20200323	Illumina NovaSeq 6000	AMPLICON	PCR
ERX4379377	ERR4438874	3	20200323	Illumina NovaSeq 6000	AMPLICON	PCR
ERX4379379	ERR4438876	3	20200323	Illumina NovaSeq 6000	AMPLICON	PCR
ERX4379413	ERR4438910	3	20200323	Illumina NovaSeq 6000	AMPLICON	PCR
ERX4398912	ERR4458541	3	20200323	Illumina NovaSeq 6000	AMPLICON	PCR
ERX4398970	ERR4458599	3	20200323	Illumina NovaSeq 6000	AMPLICON	PCR
ERX4399002	ERR4458631	3	20200323	Illumina NovaSeq 6000	AMPLICON	PCR
ERX4399004	ERR4458633	3	20200323	Illumina NovaSeq 6000	AMPLICON	PCR
ERX4399024	ERR4458653	3	20200323	Illumina NovaSeq 6000	AMPLICON	PCR
ERX4399030	ERR4458659	3	20200323	Illumina NovaSeq 6000	AMPLICON	PCR
ERX4399037	ERR4458666	3	20200323	Illumina NovaSeq 6000	AMPLICON	PCR
ERX4399039	ERR4458668	3	20200323	Illumina NovaSeq 6000	AMPLICON	PCR
ERX4399041	ERR4458670	3	20200323	Illumina NovaSeq 6000	AMPLICON	PCR
ERX4399054	ERR4458683	3	20200323	Illumina NovaSeq 6000	AMPLICON	PCR
ERX4399061	ERR4458690	3	20200323	Illumina NovaSeq 6000	AMPLICON	PCR
ERX4399140	ERR4458769	3	20200323	Illumina NovaSeq 6000	AMPLICON	PCR
ERX4399161	ERR4458790	3	20200323	Illumina NovaSeq 6000	AMPLICON	PCR
ERX4399163	ERR4458792	3	20200323	Illumina NovaSeq 6000	AMPLICON	PCR
ERX4399168	ERR4458797	3	20200323	Illumina NovaSeq 6000	AMPLICON	PCR
ERX4399210	ERR4458839	3	20200323	Illumina NovaSeq 6000	AMPLICON	PCR
ERX4399215	ERR4458844	3	20200323	Illumina NovaSeq 6000	AMPLICON	PCR
ERX4399217	ERR4458846	3	20200323	Illumina NovaSeq 6000	AMPLICON	PCR
ERX4399227	ERR4458856	3	20200323	Illumina NovaSeq 6000	AMPLICON	PCR
ERX4399256	ERR4458885	3	20200323	Illumina NovaSeq 6000	AMPLICON	PCR
ERX4399263	ERR4458892	3	20200323	Illumina NovaSeq 6000	AMPLICON	PCR
ERX4399324	ERR4458953	3	20200323	Illumina NovaSeq 6000	AMPLICON	PCR
ERX4399331	ERR4458960	3	20200323	Illumina NovaSeq 6000	AMPLICON	PCR
ERX4399334	ERR4458963	3	20200323	Illumina NovaSeq 6000	AMPLICON	PCR
ERX4399360	ERR4458989	3	20200323	Illumina NovaSeq 6000	AMPLICON	PCR
ERX4399370	ERR4458999	3	20200323	Illumina NovaSeq 6000	AMPLICON	PCR
ERX4399372	ERR4459001	3	20200323	Illumina NovaSeq 6000	AMPLICON	PCR
ERX4399379	ERR4459008	3	20200323	Illumina NovaSeq 6000	AMPLICON	PCR
ERX4399390	ERR4459019	3	20200323	Illumina NovaSeq 6000	AMPLICON	PCR
ERX4399392	ERR4459021	3	20200323	Illumina NovaSeq 6000	AMPLICON	PCR
ERX4399404	ERR4459033	3	20200323	Illumina NovaSeq 6000	AMPLICON	PCR
ERX4399410	ERR4459039	3	20200323	Illumina NovaSeq 6000	AMPLICON	PCR
ERX4399411	ERR4459040	3	20200323	Illumina NovaSeq 6000	AMPLICON	PCR
ERX4399425	ERR4459054	3	20200323	Illumina NovaSeq 6000	AMPLICON	PCR
ERX4399428	ERR4459057	3	20200323	Illumina NovaSeq 6000	AMPLICON	PCR
ERX4399437	ERR4459066	3	20200323	Illumina NovaSeq 6000	AMPLICON	PCR
ERX4399443	ERR4459072	3	20200323	Illumina NovaSeq 6000	AMPLICON	PCR
ERX4399446	ERR4459075	3	20200323	Illumina NovaSeq 6000	AMPLICON	PCR
ERX4402348	ERR4461977	3	20200323	Illumina NovaSeq 6000	AMPLICON	PCR
ERX4402358	ERR4461987	3	20200323	Illumina NovaSeq 6000	AMPLICON	PCR
ERX4402366	ERR4461995	3	20200323	Illumina NovaSeq 6000	AMPLICON	PCR
ERX4402369	ERR4461998	3	20200323	Illumina NovaSeq 6000	AMPLICON	PCR
ERX4402376	ERR4462005	3	20200323	Illumina NovaSeq 6000	AMPLICON	PCR
ERX4402388	ERR4462017	3	20200323	Illumina NovaSeq 6000	AMPLICON	PCR
ERX4402390	ERR4462019	3	20200323	Illumina NovaSeq 6000	AMPLICON	PCR
ERX4402400	ERR4462029	3	20200323	Illumina NovaSeq 6000	AMPLICON	PCR
ERX4402402	ERR4462031	3	20200323	Illumina NovaSeq 6000	AMPLICON	PCR
ERX4402418	ERR4462047	3	20200323	Illumina NovaSeq 6000	AMPLICON	PCR
ERX4402444	ERR4462073	3	20200323	Illumina NovaSeq 6000	AMPLICON	PCR
ERX4402467	ERR4462096	3	20200323	Illumina NovaSeq 6000	AMPLICON	PCR
ERX4402470	ERR4462099	3	20200323	Illumina NovaSeq 6000	AMPLICON	PCR
ERX4402499	ERR4462128	3	20200323	Illumina NovaSeq 6000	AMPLICON	PCR
ERX4402512	ERR4462141	3	20200323	Illumina NovaSeq 6000	AMPLICON	PCR
ERX4402516	ERR4462145	3	20200323	Illumina NovaSeq 6000	AMPLICON	PCR
ERX4402536	ERR4462165	3	20200323	Illumina NovaSeq 6000	AMPLICON	PCR
ERX4402543	ERR4462172	3	20200323	Illumina NovaSeq 6000	AMPLICON	PCR
ERX4402566	ERR4462195	3	20200323	Illumina NovaSeq 6000	AMPLICON	PCR
ERX4402883	ERR4462512	3	20200323	Illumina NovaSeq 6000	AMPLICON	PCR
ERX4402925	ERR4462554	3	20200323	Illumina NovaSeq 6000	AMPLICON	PCR
ERX4402987	ERR4462616	3	20200323	Illumina NovaSeq 6000	AMPLICON	PCR
ERX4536069	ERR4603922	3	20200323	Illumina NovaSeq 6000	AMPLICON	PCR
ERX4536328	ERR4604181	3	20200323	Illumina NovaSeq 6000	AMPLICON	PCR
ERX4379408	ERR4438905	3	20200323	Illumina NovaSeq 6000	AMPLICON	PCR
ERX4364856	ERR4424298	3	20200323	Illumina NovaSeq 6000	AMPLICON	PCR
ERX4535858	ERR4603711	3	20200323	Illumina NovaSeq 6000	AMPLICON	PCR
ERX4378034	ERR4437531	3	20200323	Illumina NovaSeq 6000	AMPLICON	PCR
ERX4379426	ERR4438923	3	20200323	Illumina NovaSeq 6000	AMPLICON	PCR
ERX4378063	ERR4437560	3	20200323	Illumina NovaSeq 6000	AMPLICON	PCR
ERX4402391	ERR4462020	3	20200323	Illumina NovaSeq 6000	AMPLICON	PCR
ERX4399159	ERR4458788	3	20200323	Illumina NovaSeq 6000	AMPLICON	PCR
ERX4402494	ERR4462123	3	20200323	Illumina NovaSeq 6000	AMPLICON	PCR
ERX4398862	ERR4458491	3	20200323	Illumina NovaSeq 6000	AMPLICON	PCR
ERX4402354	ERR4461983	3	20200323	Illumina NovaSeq 6000	AMPLICON	PCR
ERX4399226	ERR4458855	3	20200323	Illumina NovaSeq 6000	AMPLICON	PCR
ERX4399181	ERR4458810	3	20200323	Illumina NovaSeq 6000	AMPLICON	PCR
ERX4402481	ERR4462110	3	20200323	Illumina NovaSeq 6000	AMPLICON	PCR
ERX4363769	ERR4423211	3	20200324	Illumina NovaSeq 6000	AMPLICON	PCR
ERX4363840	ERR4423282	3	20200324	Illumina NovaSeq 6000	AMPLICON	PCR
ERX4363883	ERR4423325	3	20200324	Illumina NovaSeq 6000	AMPLICON	PCR
ERX4364364	ERR4423806	3	20200324	Illumina NovaSeq 6000	AMPLICON	PCR
ERX4364740	ERR4424182	3	20200324	Illumina NovaSeq 6000	AMPLICON	PCR
ERX4364866	ERR4424308	3	20200324	Illumina NovaSeq 6000	AMPLICON	PCR
ERX4365115	ERR4424557	3	20200324	Illumina NovaSeq 6000	AMPLICON	PCR
ERX4365261	ERR4424703	3	20200324	Illumina NovaSeq 6000	AMPLICON	PCR
ERX4379354	ERR4438851	3	20200324	Illumina NovaSeq 6000	AMPLICON	PCR
ERX4379365	ERR4438862	3	20200324	Illumina NovaSeq 6000	AMPLICON	PCR
ERX4379381	ERR4438878	3	20200324	Illumina NovaSeq 6000	AMPLICON	PCR
ERX4379389	ERR4438886	3	20200324	Illumina NovaSeq 6000	AMPLICON	PCR
ERX4379391	ERR4438888	3	20200324	Illumina NovaSeq 6000	AMPLICON	PCR
ERX4379393	ERR4438890	3	20200324	Illumina NovaSeq 6000	AMPLICON	PCR
ERX4379395	ERR4438892	3	20200324	Illumina NovaSeq 6000	AMPLICON	PCR
ERX4379396	ERR4438893	3	20200324	Illumina NovaSeq 6000	AMPLICON	PCR
ERX4379404	ERR4438901	3	20200324	Illumina NovaSeq 6000	AMPLICON	PCR
ERX4379417	ERR4438914	3	20200324	Illumina NovaSeq 6000	AMPLICON	PCR
ERX4379424	ERR4438921	3	20200324	Illumina NovaSeq 6000	AMPLICON	PCR
ERX4379428	ERR4438925	3	20200324	Illumina NovaSeq 6000	AMPLICON	PCR
ERX4399221	ERR4458850	3	20200324	Illumina NovaSeq 6000	AMPLICON	PCR
ERX4399258	ERR4458887	3	20200324	Illumina NovaSeq 6000	AMPLICON	PCR
ERX4399260	ERR4458889	3	20200324	Illumina NovaSeq 6000	AMPLICON	PCR
ERX4399285	ERR4458914	3	20200324	Illumina NovaSeq 6000	AMPLICON	PCR
ERX4399286	ERR4458915	3	20200324	Illumina NovaSeq 6000	AMPLICON	PCR
ERX4399294	ERR4458923	3	20200324	Illumina NovaSeq 6000	AMPLICON	PCR
ERX4399326	ERR4458955	3	20200324	Illumina NovaSeq 6000	AMPLICON	PCR
ERX4399332	ERR4458961	3	20200324	Illumina NovaSeq 6000	AMPLICON	PCR
ERX4399333	ERR4458962	3	20200324	Illumina NovaSeq 6000	AMPLICON	PCR
ERX4399377	ERR4459006	3	20200324	Illumina NovaSeq 6000	AMPLICON	PCR
ERX4399402	ERR4459031	3	20200324	Illumina NovaSeq 6000	AMPLICON	PCR
ERX4399417	ERR4459046	3	20200324	Illumina NovaSeq 6000	AMPLICON	PCR
ERX4399423	ERR4459052	3	20200324	Illumina NovaSeq 6000	AMPLICON	PCR
ERX4399441	ERR4459070	3	20200324	Illumina NovaSeq 6000	AMPLICON	PCR
ERX4401601	ERR4461230	3	20200324	Illumina NovaSeq 6000	AMPLICON	PCR
ERX4401740	ERR4461369	3	20200324	Illumina NovaSeq 6000	AMPLICON	PCR
ERX4401794	ERR4461423	3	20200324	Illumina NovaSeq 6000	AMPLICON	PCR
ERX4401917	ERR4461546	3	20200324	Illumina NovaSeq 6000	AMPLICON	PCR
ERX4402349	ERR4461978	3	20200324	Illumina NovaSeq 6000	AMPLICON	PCR
ERX4402353	ERR4461982	3	20200324	Illumina NovaSeq 6000	AMPLICON	PCR
ERX4402356	ERR4461985	3	20200324	Illumina NovaSeq 6000	AMPLICON	PCR
ERX4402360	ERR4461989	3	20200324	Illumina NovaSeq 6000	AMPLICON	PCR
ERX4402372	ERR4462001	3	20200324	Illumina NovaSeq 6000	AMPLICON	PCR
ERX4402384	ERR4462013	3	20200324	Illumina NovaSeq 6000	AMPLICON	PCR
ERX4402397	ERR4462026	3	20200324	Illumina NovaSeq 6000	AMPLICON	PCR
ERX4402420	ERR4462049	3	20200324	Illumina NovaSeq 6000	AMPLICON	PCR
ERX4402426	ERR4462055	3	20200324	Illumina NovaSeq 6000	AMPLICON	PCR
ERX4402437	ERR4462066	3	20200324	Illumina NovaSeq 6000	AMPLICON	PCR
ERX4402439	ERR4462068	3	20200324	Illumina NovaSeq 6000	AMPLICON	PCR
ERX4402447	ERR4462076	3	20200324	Illumina NovaSeq 6000	AMPLICON	PCR
ERX4402449	ERR4462078	3	20200324	Illumina NovaSeq 6000	AMPLICON	PCR
ERX4402450	ERR4462079	3	20200324	Illumina NovaSeq 6000	AMPLICON	PCR
ERX4402459	ERR4462088	3	20200324	Illumina NovaSeq 6000	AMPLICON	PCR
ERX4402477	ERR4462106	3	20200324	Illumina NovaSeq 6000	AMPLICON	PCR
ERX4402482	ERR4462111	3	20200324	Illumina NovaSeq 6000	AMPLICON	PCR
ERX4402489	ERR4462118	3	20200324	Illumina NovaSeq 6000	AMPLICON	PCR
ERX4402495	ERR4462124	3	20200324	Illumina NovaSeq 6000	AMPLICON	PCR
ERX4402501	ERR4462130	3	20200324	Illumina NovaSeq 6000	AMPLICON	PCR
ERX4402502	ERR4462131	3	20200324	Illumina NovaSeq 6000	AMPLICON	PCR
ERX4402505	ERR4462134	3	20200324	Illumina NovaSeq 6000	AMPLICON	PCR
ERX4402506	ERR4462135	3	20200324	Illumina NovaSeq 6000	AMPLICON	PCR
ERX4402518	ERR4462147	3	20200324	Illumina NovaSeq 6000	AMPLICON	PCR
ERX4402526	ERR4462155	3	20200324	Illumina NovaSeq 6000	AMPLICON	PCR
ERX4402529	ERR4462158	3	20200324	Illumina NovaSeq 6000	AMPLICON	PCR
ERX4402541	ERR4462170	3	20200324	Illumina NovaSeq 6000	AMPLICON	PCR
ERX4402544	ERR4462173	3	20200324	Illumina NovaSeq 6000	AMPLICON	PCR
ERX4402551	ERR4462180	3	20200324	Illumina NovaSeq 6000	AMPLICON	PCR
ERX4402561	ERR4462190	3	20200324	Illumina NovaSeq 6000	AMPLICON	PCR
ERX4402860	ERR4462489	3	20200324	Illumina NovaSeq 6000	AMPLICON	PCR
ERX4402884	ERR4462513	3	20200324	Illumina NovaSeq 6000	AMPLICON	PCR
ERX4402901	ERR4462530	3	20200324	Illumina NovaSeq 6000	AMPLICON	PCR
ERX4402933	ERR4462562	3	20200324	Illumina NovaSeq 6000	AMPLICON	PCR
ERX4402942	ERR4462571	3	20200324	Illumina NovaSeq 6000	AMPLICON	PCR
ERX4402983	ERR4462612	3	20200324	Illumina NovaSeq 6000	AMPLICON	PCR
ERX4402988	ERR4462617	3	20200324	Illumina NovaSeq 6000	AMPLICON	PCR
ERX4535911	ERR4603764	3	20200324	Illumina NovaSeq 6000	AMPLICON	PCR
ERX4535937	ERR4603790	3	20200324	Illumina NovaSeq 6000	AMPLICON	PCR
ERX4535953	ERR4603806	3	20200324	Illumina NovaSeq 6000	AMPLICON	PCR
ERX4536002	ERR4603855	3	20200324	Illumina NovaSeq 6000	AMPLICON	PCR
ERX4536071	ERR4603924	3	20200324	Illumina NovaSeq 6000	AMPLICON	PCR
ERX4536310	ERR4604163	3	20200324	Illumina NovaSeq 6000	AMPLICON	PCR
ERX4536317	ERR4604170	3	20200324	Illumina NovaSeq 6000	AMPLICON	PCR
ERX4536318	ERR4604171	3	20200324	Illumina NovaSeq 6000	AMPLICON	PCR
ERX4536322	ERR4604175	3	20200324	Illumina NovaSeq 6000	AMPLICON	PCR
ERX4536334	ERR4604187	3	20200324	Illumina NovaSeq 6000	AMPLICON	PCR
ERX4379427	ERR4438924	3	20200324	Illumina NovaSeq 6000	AMPLICON	PCR
ERX4402453	ERR4462082	3	20200324	Illumina NovaSeq 6000	AMPLICON	PCR
ERX4363954	ERR4423396	3	20200324	Illumina NovaSeq 6000	AMPLICON	PCR
ERX4379386	ERR4438883	3	20200324	Illumina NovaSeq 6000	AMPLICON	PCR
ERX4402537	ERR4462166	3	20200324	Illumina NovaSeq 6000	AMPLICON	PCR
ERX4402416	ERR4462045	3	20200324	Illumina NovaSeq 6000	AMPLICON	PCR
ERX4399388	ERR4459017	3	20200324	Illumina NovaSeq 6000	AMPLICON	PCR
ERX4399400	ERR4459029	3	20200324	Illumina NovaSeq 6000	AMPLICON	PCR
ERX4379409	ERR4438906	3	20200324	Illumina NovaSeq 6000	AMPLICON	PCR
ERX4535959	ERR4603812	3	20200324	Illumina NovaSeq 6000	AMPLICON	PCR
ERX4402469	ERR4462098	3	20200324	Illumina NovaSeq 6000	AMPLICON	PCR
ERX4402473	ERR4462102	3	20200324	Illumina NovaSeq 6000	AMPLICON	PCR
ERX4363136	ERR4422578	3	20200324	Illumina NovaSeq 6000	AMPLICON	PCR
ERX4363629	ERR4423071	3	20200325	Illumina NovaSeq 6000	AMPLICON	PCR
ERX4363636	ERR4423078	3	20200325	Illumina NovaSeq 6000	AMPLICON	PCR
ERX4363641	ERR4423083	3	20200325	Illumina NovaSeq 6000	AMPLICON	PCR
ERX4363676	ERR4423118	3	20200325	Illumina NovaSeq 6000	AMPLICON	PCR
ERX4363694	ERR4423136	3	20200325	Illumina NovaSeq 6000	AMPLICON	PCR
ERX4363733	ERR4423175	3	20200325	Illumina NovaSeq 6000	AMPLICON	PCR
ERX4363784	ERR4423226	3	20200325	Illumina NovaSeq 6000	AMPLICON	PCR
ERX4363815	ERR4423257	3	20200325	Illumina NovaSeq 6000	AMPLICON	PCR
ERX4363833	ERR4423275	3	20200325	Illumina NovaSeq 6000	AMPLICON	PCR
ERX4363889	ERR4423331	3	20200325	Illumina NovaSeq 6000	AMPLICON	PCR
ERX4364454	ERR4423896	3	20200325	Illumina NovaSeq 6000	AMPLICON	PCR
ERX4364972	ERR4424414	3	20200325	Illumina NovaSeq 6000	AMPLICON	PCR
ERX4377761	ERR4437258	3	20200325	Illumina NovaSeq 6000	AMPLICON	PCR
ERX4377962	ERR4437459	3	20200325	Illumina NovaSeq 6000	AMPLICON	PCR
ERX4377967	ERR4437464	3	20200325	Illumina NovaSeq 6000	AMPLICON	PCR
ERX4378035	ERR4437532	3	20200325	Illumina NovaSeq 6000	AMPLICON	PCR
ERX4379356	ERR4438853	3	20200325	Illumina NovaSeq 6000	AMPLICON	PCR
ERX4379364	ERR4438861	3	20200325	Illumina NovaSeq 6000	AMPLICON	PCR
ERX4379368	ERR4438865	3	20200325	Illumina NovaSeq 6000	AMPLICON	PCR
ERX4379399	ERR4438896	3	20200325	Illumina NovaSeq 6000	AMPLICON	PCR
ERX4379407	ERR4438904	3	20200325	Illumina NovaSeq 6000	AMPLICON	PCR
ERX4401579	ERR4461208	3	20200325	Illumina NovaSeq 6000	AMPLICON	PCR
ERX4401611	ERR4461240	3	20200325	Illumina NovaSeq 6000	AMPLICON	PCR
ERX4401625	ERR4461254	3	20200325	Illumina NovaSeq 6000	AMPLICON	PCR
ERX4401627	ERR4461256	3	20200325	Illumina NovaSeq 6000	AMPLICON	PCR
ERX4401630	ERR4461259	3	20200325	Illumina NovaSeq 6000	AMPLICON	PCR
ERX4401633	ERR4461262	3	20200325	Illumina NovaSeq 6000	AMPLICON	PCR
ERX4401636	ERR4461265	3	20200325	Illumina NovaSeq 6000	AMPLICON	PCR
ERX4401637	ERR4461266	3	20200325	Illumina NovaSeq 6000	AMPLICON	PCR
ERX4401654	ERR4461283	3	20200325	Illumina NovaSeq 6000	AMPLICON	PCR
ERX4401670	ERR4461299	3	20200325	Illumina NovaSeq 6000	AMPLICON	PCR
ERX4401692	ERR4461321	3	20200325	Illumina NovaSeq 6000	AMPLICON	PCR
ERX4401707	ERR4461336	3	20200325	Illumina NovaSeq 6000	AMPLICON	PCR
ERX4401712	ERR4461341	3	20200325	Illumina NovaSeq 6000	AMPLICON	PCR
ERX4401729	ERR4461358	3	20200325	Illumina NovaSeq 6000	AMPLICON	PCR
ERX4401732	ERR4461361	3	20200325	Illumina NovaSeq 6000	AMPLICON	PCR
ERX4401736	ERR4461365	3	20200325	Illumina NovaSeq 6000	AMPLICON	PCR
ERX4401787	ERR4461416	3	20200325	Illumina NovaSeq 6000	AMPLICON	PCR
ERX4401797	ERR4461426	3	20200325	Illumina NovaSeq 6000	AMPLICON	PCR
ERX4401812	ERR4461441	3	20200325	Illumina NovaSeq 6000	AMPLICON	PCR
ERX4401821	ERR4461450	3	20200325	Illumina NovaSeq 6000	AMPLICON	PCR
ERX4401843	ERR4461472	3	20200325	Illumina NovaSeq 6000	AMPLICON	PCR
ERX4401853	ERR4461482	3	20200325	Illumina NovaSeq 6000	AMPLICON	PCR
ERX4401855	ERR4461484	3	20200325	Illumina NovaSeq 6000	AMPLICON	PCR
ERX4401915	ERR4461544	3	20200325	Illumina NovaSeq 6000	AMPLICON	PCR
ERX4401922	ERR4461551	3	20200325	Illumina NovaSeq 6000	AMPLICON	PCR
ERX4402377	ERR4462006	3	20200325	Illumina NovaSeq 6000	AMPLICON	PCR
ERX4402380	ERR4462009	3	20200325	Illumina NovaSeq 6000	AMPLICON	PCR
ERX4402387	ERR4462016	3	20200325	Illumina NovaSeq 6000	AMPLICON	PCR
ERX4402393	ERR4462022	3	20200325	Illumina NovaSeq 6000	AMPLICON	PCR
ERX4402410	ERR4462039	3	20200325	Illumina NovaSeq 6000	AMPLICON	PCR
ERX4402412	ERR4462041	3	20200325	Illumina NovaSeq 6000	AMPLICON	PCR
ERX4402415	ERR4462044	3	20200325	Illumina NovaSeq 6000	AMPLICON	PCR
ERX4402421	ERR4462050	3	20200325	Illumina NovaSeq 6000	AMPLICON	PCR
ERX4402427	ERR4462056	3	20200325	Illumina NovaSeq 6000	AMPLICON	PCR
ERX4402430	ERR4462059	3	20200325	Illumina NovaSeq 6000	AMPLICON	PCR
ERX4402434	ERR4462063	3	20200325	Illumina NovaSeq 6000	AMPLICON	PCR
ERX4402435	ERR4462064	3	20200325	Illumina NovaSeq 6000	AMPLICON	PCR
ERX4402452	ERR4462081	3	20200325	Illumina NovaSeq 6000	AMPLICON	PCR
ERX4402454	ERR4462083	3	20200325	Illumina NovaSeq 6000	AMPLICON	PCR
ERX4402456	ERR4462085	3	20200325	Illumina NovaSeq 6000	AMPLICON	PCR
ERX4402471	ERR4462100	3	20200325	Illumina NovaSeq 6000	AMPLICON	PCR
ERX4402472	ERR4462101	3	20200325	Illumina NovaSeq 6000	AMPLICON	PCR
ERX4402478	ERR4462107	3	20200325	Illumina NovaSeq 6000	AMPLICON	PCR
ERX4402486	ERR4462115	3	20200325	Illumina NovaSeq 6000	AMPLICON	PCR
ERX4402487	ERR4462116	3	20200325	Illumina NovaSeq 6000	AMPLICON	PCR
ERX4402507	ERR4462136	3	20200325	Illumina NovaSeq 6000	AMPLICON	PCR
ERX4402508	ERR4462137	3	20200325	Illumina NovaSeq 6000	AMPLICON	PCR
ERX4402509	ERR4462138	3	20200325	Illumina NovaSeq 6000	AMPLICON	PCR
ERX4402510	ERR4462139	3	20200325	Illumina NovaSeq 6000	AMPLICON	PCR
ERX4402511	ERR4462140	3	20200325	Illumina NovaSeq 6000	AMPLICON	PCR
ERX4402522	ERR4462151	3	20200325	Illumina NovaSeq 6000	AMPLICON	PCR
ERX4402531	ERR4462160	3	20200325	Illumina NovaSeq 6000	AMPLICON	PCR
ERX4402553	ERR4462182	3	20200325	Illumina NovaSeq 6000	AMPLICON	PCR
ERX4402557	ERR4462186	3	20200325	Illumina NovaSeq 6000	AMPLICON	PCR
ERX4402558	ERR4462187	3	20200325	Illumina NovaSeq 6000	AMPLICON	PCR
ERX4402573	ERR4462202	3	20200325	Illumina NovaSeq 6000	AMPLICON	PCR
ERX4402578	ERR4462207	3	20200325	Illumina NovaSeq 6000	AMPLICON	PCR
ERX4402936	ERR4462565	3	20200325	Illumina NovaSeq 6000	AMPLICON	PCR
ERX4402967	ERR4462596	3	20200325	Illumina NovaSeq 6000	AMPLICON	PCR
ERX4517190	ERR4581650	3	20200325	Illumina NovaSeq 6000	AMPLICON	PCR
ERX4535915	ERR4603768	3	20200325	Illumina NovaSeq 6000	AMPLICON	PCR
ERX4535927	ERR4603780	3	20200325	Illumina NovaSeq 6000	AMPLICON	PCR
ERX4535936	ERR4603789	3	20200325	Illumina NovaSeq 6000	AMPLICON	PCR
ERX4535963	ERR4603816	3	20200325	Illumina NovaSeq 6000	AMPLICON	PCR
ERX4536307	ERR4604160	3	20200325	Illumina NovaSeq 6000	AMPLICON	PCR
ERX4401781	ERR4461410	3	20200325	Illumina NovaSeq 6000	AMPLICON	PCR
ERX4401916	ERR4461545	3	20200325	Illumina NovaSeq 6000	AMPLICON	PCR
ERX4401709	ERR4461338	3	20200325	Illumina NovaSeq 6000	AMPLICON	PCR
ERX4402517	ERR4462146	3	20200325	Illumina NovaSeq 6000	AMPLICON	PCR
ERX4401647	ERR4461276	3	20200325	Illumina NovaSeq 6000	AMPLICON	PCR
ERX4401901	ERR4461530	3	20200325	Illumina NovaSeq 6000	AMPLICON	PCR
ERX4402455	ERR4462084	3	20200325	Illumina NovaSeq 6000	AMPLICON	PCR
ERX4363897	ERR4423339	3	20200325	Illumina NovaSeq 6000	AMPLICON	PCR
ERX4401634	ERR4461263	3	20200325	Illumina NovaSeq 6000	AMPLICON	PCR
ERX4402357	ERR4461986	3	20200325	Illumina NovaSeq 6000	AMPLICON	PCR
ERX4401848	ERR4461477	3	20200325	Illumina NovaSeq 6000	AMPLICON	PCR
ERX4545099	ERR4616058	3	20200325	Illumina NovaSeq 6000	AMPLICON	PCR
ERX4401612	ERR4461241	3	20200325	Illumina NovaSeq 6000	AMPLICON	PCR
ERX4363101	ERR4422543	3	20200326	Illumina NovaSeq 6000	AMPLICON	PCR
ERX4363139	ERR4422581	3	20200326	Illumina NovaSeq 6000	AMPLICON	PCR
ERX4363669	ERR4423111	3	20200326	Illumina NovaSeq 6000	AMPLICON	PCR
ERX4363683	ERR4423125	3	20200326	Illumina NovaSeq 6000	AMPLICON	PCR
ERX4363686	ERR4423128	3	20200326	Illumina NovaSeq 6000	AMPLICON	PCR
ERX4363752	ERR4423194	3	20200326	Illumina NovaSeq 6000	AMPLICON	PCR
ERX4363767	ERR4423209	3	20200326	Illumina NovaSeq 6000	AMPLICON	PCR
ERX4363822	ERR4423264	3	20200326	Illumina NovaSeq 6000	AMPLICON	PCR
ERX4363828	ERR4423270	3	20200326	Illumina NovaSeq 6000	AMPLICON	PCR
ERX4364428	ERR4423870	3	20200326	Illumina NovaSeq 6000	AMPLICON	PCR
ERX4377760	ERR4437257	3	20200326	Illumina NovaSeq 6000	AMPLICON	PCR
ERX4377973	ERR4437470	3	20200326	Illumina NovaSeq 6000	AMPLICON	PCR
ERX4377990	ERR4437487	3	20200326	Illumina NovaSeq 6000	AMPLICON	PCR
ERX4378015	ERR4437512	3	20200326	Illumina NovaSeq 6000	AMPLICON	PCR
ERX4378020	ERR4437517	3	20200326	Illumina NovaSeq 6000	AMPLICON	PCR
ERX4378024	ERR4437521	3	20200326	Illumina NovaSeq 6000	AMPLICON	PCR
ERX4378096	ERR4437593	3	20200326	Illumina NovaSeq 6000	AMPLICON	PCR
ERX4378683	ERR4438180	3	20200326	Illumina NovaSeq 6000	AMPLICON	PCR
ERX4378833	ERR4438330	3	20200326	Illumina NovaSeq 6000	AMPLICON	PCR
ERX4379352	ERR4438849	3	20200326	Illumina NovaSeq 6000	AMPLICON	PCR
ERX4379400	ERR4438897	3	20200326	Illumina NovaSeq 6000	AMPLICON	PCR
ERX4400465	ERR4460094	3	20200326	Illumina NovaSeq 6000	AMPLICON	PCR
ERX4400500	ERR4460129	3	20200326	Illumina NovaSeq 6000	AMPLICON	PCR
ERX4400519	ERR4460148	3	20200326	Illumina NovaSeq 6000	AMPLICON	PCR
ERX4400525	ERR4460154	3	20200326	Illumina NovaSeq 6000	AMPLICON	PCR
ERX4400530	ERR4460159	3	20200326	Illumina NovaSeq 6000	AMPLICON	PCR
ERX4401587	ERR4461216	3	20200326	Illumina NovaSeq 6000	AMPLICON	PCR
ERX4401596	ERR4461225	3	20200326	Illumina NovaSeq 6000	AMPLICON	PCR
ERX4401613	ERR4461242	3	20200326	Illumina NovaSeq 6000	AMPLICON	PCR
ERX4401657	ERR4461286	3	20200326	Illumina NovaSeq 6000	AMPLICON	PCR
ERX4401665	ERR4461294	3	20200326	Illumina NovaSeq 6000	AMPLICON	PCR
ERX4401688	ERR4461317	3	20200326	Illumina NovaSeq 6000	AMPLICON	PCR
ERX4401700	ERR4461329	3	20200326	Illumina NovaSeq 6000	AMPLICON	PCR
ERX4401705	ERR4461334	3	20200326	Illumina NovaSeq 6000	AMPLICON	PCR
ERX4401711	ERR4461340	3	20200326	Illumina NovaSeq 6000	AMPLICON	PCR
ERX4401742	ERR4461371	3	20200326	Illumina NovaSeq 6000	AMPLICON	PCR
ERX4401751	ERR4461380	3	20200326	Illumina NovaSeq 6000	AMPLICON	PCR
ERX4401756	ERR4461385	3	20200326	Illumina NovaSeq 6000	AMPLICON	PCR
ERX4401760	ERR4461389	3	20200326	Illumina NovaSeq 6000	AMPLICON	PCR
ERX4401770	ERR4461399	3	20200326	Illumina NovaSeq 6000	AMPLICON	PCR
ERX4401771	ERR4461400	3	20200326	Illumina NovaSeq 6000	AMPLICON	PCR
ERX4401773	ERR4461402	3	20200326	Illumina NovaSeq 6000	AMPLICON	PCR
ERX4401802	ERR4461431	3	20200326	Illumina NovaSeq 6000	AMPLICON	PCR
ERX4401806	ERR4461435	3	20200326	Illumina NovaSeq 6000	AMPLICON	PCR
ERX4401817	ERR4461446	3	20200326	Illumina NovaSeq 6000	AMPLICON	PCR
ERX4401828	ERR4461457	3	20200326	Illumina NovaSeq 6000	AMPLICON	PCR
ERX4401847	ERR4461476	3	20200326	Illumina NovaSeq 6000	AMPLICON	PCR
ERX4401849	ERR4461478	3	20200326	Illumina NovaSeq 6000	AMPLICON	PCR
ERX4401857	ERR4461486	3	20200326	Illumina NovaSeq 6000	AMPLICON	PCR
ERX4401861	ERR4461490	3	20200326	Illumina NovaSeq 6000	AMPLICON	PCR
ERX4401862	ERR4461491	3	20200326	Illumina NovaSeq 6000	AMPLICON	PCR
ERX4401864	ERR4461493	3	20200326	Illumina NovaSeq 6000	AMPLICON	PCR
ERX4401870	ERR4461499	3	20200326	Illumina NovaSeq 6000	AMPLICON	PCR
ERX4401882	ERR4461511	3	20200326	Illumina NovaSeq 6000	AMPLICON	PCR
ERX4401888	ERR4461517	3	20200326	Illumina NovaSeq 6000	AMPLICON	PCR
ERX4401894	ERR4461523	3	20200326	Illumina NovaSeq 6000	AMPLICON	PCR
ERX4401896	ERR4461525	3	20200326	Illumina NovaSeq 6000	AMPLICON	PCR
ERX4401903	ERR4461532	3	20200326	Illumina NovaSeq 6000	AMPLICON	PCR
ERX4401907	ERR4461536	3	20200326	Illumina NovaSeq 6000	AMPLICON	PCR
ERX4401908	ERR4461537	3	20200326	Illumina NovaSeq 6000	AMPLICON	PCR
ERX4401919	ERR4461548	3	20200326	Illumina NovaSeq 6000	AMPLICON	PCR
ERX4401926	ERR4461555	3	20200326	Illumina NovaSeq 6000	AMPLICON	PCR
ERX4402389	ERR4462018	3	20200326	Illumina NovaSeq 6000	AMPLICON	PCR
ERX4402396	ERR4462025	3	20200326	Illumina NovaSeq 6000	AMPLICON	PCR
ERX4402408	ERR4462037	3	20200326	Illumina NovaSeq 6000	AMPLICON	PCR
ERX4402475	ERR4462104	3	20200326	Illumina NovaSeq 6000	AMPLICON	PCR
ERX4402498	ERR4462127	3	20200326	Illumina NovaSeq 6000	AMPLICON	PCR
ERX4402514	ERR4462143	3	20200326	Illumina NovaSeq 6000	AMPLICON	PCR
ERX4402521	ERR4462150	3	20200326	Illumina NovaSeq 6000	AMPLICON	PCR
ERX4402524	ERR4462153	3	20200326	Illumina NovaSeq 6000	AMPLICON	PCR
ERX4402530	ERR4462159	3	20200326	Illumina NovaSeq 6000	AMPLICON	PCR
ERX4402542	ERR4462171	3	20200326	Illumina NovaSeq 6000	AMPLICON	PCR
ERX4402562	ERR4462191	3	20200326	Illumina NovaSeq 6000	AMPLICON	PCR
ERX4402570	ERR4462199	3	20200326	Illumina NovaSeq 6000	AMPLICON	PCR
ERX4402572	ERR4462201	3	20200326	Illumina NovaSeq 6000	AMPLICON	PCR
ERX4402576	ERR4462205	3	20200326	Illumina NovaSeq 6000	AMPLICON	PCR
ERX4402903	ERR4462532	3	20200326	Illumina NovaSeq 6000	AMPLICON	PCR
ERX4402919	ERR4462548	3	20200326	Illumina NovaSeq 6000	AMPLICON	PCR
ERX4402934	ERR4462563	3	20200326	Illumina NovaSeq 6000	AMPLICON	PCR
ERX4402979	ERR4462608	3	20200326	Illumina NovaSeq 6000	AMPLICON	PCR
ERX4402991	ERR4462620	3	20200326	Illumina NovaSeq 6000	AMPLICON	PCR
ERX4402992	ERR4462621	3	20200326	Illumina NovaSeq 6000	AMPLICON	PCR
ERX4535907	ERR4603760	3	20200326	Illumina NovaSeq 6000	AMPLICON	PCR
ERX4535945	ERR4603798	3	20200326	Illumina NovaSeq 6000	AMPLICON	PCR
ERX4535950	ERR4603803	3	20200326	Illumina NovaSeq 6000	AMPLICON	PCR
ERX4536273	ERR4604126	3	20200326	Illumina NovaSeq 6000	AMPLICON	PCR
ERX4536276	ERR4604129	3	20200326	Illumina NovaSeq 6000	AMPLICON	PCR
ERX4536288	ERR4604141	3	20200326	Illumina NovaSeq 6000	AMPLICON	PCR
ERX4536296	ERR4604149	3	20200326	Illumina NovaSeq 6000	AMPLICON	PCR
ERX4401807	ERR4461436	3	20200326	Illumina NovaSeq 6000	AMPLICON	PCR
ERX4401799	ERR4461428	3	20200326	Illumina NovaSeq 6000	AMPLICON	PCR
ERX4363737	ERR4423179	3	20200326	Illumina NovaSeq 6000	AMPLICON	PCR
ERX4363696	ERR4423138	3	20200326	Illumina NovaSeq 6000	AMPLICON	PCR
ERX4401753	ERR4461382	3	20200326	Illumina NovaSeq 6000	AMPLICON	PCR
ERX4377996	ERR4437493	3	20200326	Illumina NovaSeq 6000	AMPLICON	PCR
ERX4400513	ERR4460142	3	20200326	Illumina NovaSeq 6000	AMPLICON	PCR
ERX4401745	ERR4461374	3	20200326	Illumina NovaSeq 6000	AMPLICON	PCR
ERX4402888	ERR4462517	3	20200326	Illumina NovaSeq 6000	AMPLICON	PCR
ERX4363637	ERR4423079	3	20200327	Illumina NovaSeq 6000	AMPLICON	PCR
ERX4363638	ERR4423080	3	20200327	Illumina NovaSeq 6000	AMPLICON	PCR
ERX4363640	ERR4423082	3	20200327	Illumina NovaSeq 6000	AMPLICON	PCR
ERX4363653	ERR4423095	3	20200327	Illumina NovaSeq 6000	AMPLICON	PCR
ERX4363710	ERR4423152	3	20200327	Illumina NovaSeq 6000	AMPLICON	PCR
ERX4363729	ERR4423171	3	20200327	Illumina NovaSeq 6000	AMPLICON	PCR
ERX4363731	ERR4423173	3	20200327	Illumina NovaSeq 6000	AMPLICON	PCR
ERX4363732	ERR4423174	3	20200327	Illumina NovaSeq 6000	AMPLICON	PCR
ERX4363734	ERR4423176	3	20200327	Illumina NovaSeq 6000	AMPLICON	PCR
ERX4363743	ERR4423185	3	20200327	Illumina NovaSeq 6000	AMPLICON	PCR
ERX4363757	ERR4423199	3	20200327	Illumina NovaSeq 6000	AMPLICON	PCR
ERX4363802	ERR4423244	3	20200327	Illumina NovaSeq 6000	AMPLICON	PCR
ERX4363805	ERR4423247	3	20200327	Illumina NovaSeq 6000	AMPLICON	PCR
ERX4363820	ERR4423262	3	20200327	Illumina NovaSeq 6000	AMPLICON	PCR
ERX4363873	ERR4423315	3	20200327	Illumina NovaSeq 6000	AMPLICON	PCR
ERX4364935	ERR4424377	3	20200327	Illumina NovaSeq 6000	AMPLICON	PCR
ERX4365018	ERR4424460	3	20200327	Illumina NovaSeq 6000	AMPLICON	PCR
ERX4365079	ERR4424521	3	20200327	Illumina NovaSeq 6000	AMPLICON	PCR
ERX4365163	ERR4424605	3	20200327	Illumina NovaSeq 6000	AMPLICON	PCR
ERX4365177	ERR4424619	3	20200327	Illumina NovaSeq 6000	AMPLICON	PCR
ERX4365227	ERR4424669	3	20200327	Illumina NovaSeq 6000	AMPLICON	PCR
ERX4377765	ERR4437262	3	20200327	Illumina NovaSeq 6000	AMPLICON	PCR
ERX4377812	ERR4437309	3	20200327	Illumina NovaSeq 6000	AMPLICON	PCR
ERX4377820	ERR4437317	3	20200327	Illumina NovaSeq 6000	AMPLICON	PCR
ERX4377826	ERR4437323	3	20200327	Illumina NovaSeq 6000	AMPLICON	PCR
ERX4377842	ERR4437339	3	20200327	Illumina NovaSeq 6000	AMPLICON	PCR
ERX4377855	ERR4437352	3	20200327	Illumina NovaSeq 6000	AMPLICON	PCR
ERX4377915	ERR4437412	3	20200327	Illumina NovaSeq 6000	AMPLICON	PCR
ERX4377921	ERR4437418	3	20200327	Illumina NovaSeq 6000	AMPLICON	PCR
ERX4377925	ERR4437422	3	20200327	Illumina NovaSeq 6000	AMPLICON	PCR
ERX4377997	ERR4437494	3	20200327	Illumina NovaSeq 6000	AMPLICON	PCR
ERX4377999	ERR4437496	3	20200327	Illumina NovaSeq 6000	AMPLICON	PCR
ERX4378027	ERR4437524	3	20200327	Illumina NovaSeq 6000	AMPLICON	PCR
ERX4378075	ERR4437572	3	20200327	Illumina NovaSeq 6000	AMPLICON	PCR
ERX4378089	ERR4437586	3	20200327	Illumina NovaSeq 6000	AMPLICON	PCR
ERX4378676	ERR4438173	3	20200327	Illumina NovaSeq 6000	AMPLICON	PCR
ERX4378678	ERR4438175	3	20200327	Illumina NovaSeq 6000	AMPLICON	PCR
ERX4378721	ERR4438218	3	20200327	Illumina NovaSeq 6000	AMPLICON	PCR
ERX4378756	ERR4438253	3	20200327	Illumina NovaSeq 6000	AMPLICON	PCR
ERX4378759	ERR4438256	3	20200327	Illumina NovaSeq 6000	AMPLICON	PCR
ERX4378781	ERR4438278	3	20200327	Illumina NovaSeq 6000	AMPLICON	PCR
ERX4399237	ERR4458866	3	20200327	Illumina NovaSeq 6000	AMPLICON	PCR
ERX4399251	ERR4458880	3	20200327	Illumina NovaSeq 6000	AMPLICON	PCR
ERX4400404	ERR4460033	3	20200327	Illumina NovaSeq 6000	AMPLICON	PCR
ERX4400436	ERR4460065	3	20200327	Illumina NovaSeq 6000	AMPLICON	PCR
ERX4400483	ERR4460112	3	20200327	Illumina NovaSeq 6000	AMPLICON	PCR
ERX4401589	ERR4461218	3	20200327	Illumina NovaSeq 6000	AMPLICON	PCR
ERX4401594	ERR4461223	3	20200327	Illumina NovaSeq 6000	AMPLICON	PCR
ERX4401599	ERR4461228	3	20200327	Illumina NovaSeq 6000	AMPLICON	PCR
ERX4401602	ERR4461231	3	20200327	Illumina NovaSeq 6000	AMPLICON	PCR
ERX4401615	ERR4461244	3	20200327	Illumina NovaSeq 6000	AMPLICON	PCR
ERX4401685	ERR4461314	3	20200327	Illumina NovaSeq 6000	AMPLICON	PCR
ERX4401693	ERR4461322	3	20200327	Illumina NovaSeq 6000	AMPLICON	PCR
ERX4401703	ERR4461332	3	20200327	Illumina NovaSeq 6000	AMPLICON	PCR
ERX4401713	ERR4461342	3	20200327	Illumina NovaSeq 6000	AMPLICON	PCR
ERX4401715	ERR4461344	3	20200327	Illumina NovaSeq 6000	AMPLICON	PCR
ERX4401768	ERR4461397	3	20200327	Illumina NovaSeq 6000	AMPLICON	PCR
ERX4401772	ERR4461401	3	20200327	Illumina NovaSeq 6000	AMPLICON	PCR
ERX4401778	ERR4461407	3	20200327	Illumina NovaSeq 6000	AMPLICON	PCR
ERX4401818	ERR4461447	3	20200327	Illumina NovaSeq 6000	AMPLICON	PCR
ERX4401846	ERR4461475	3	20200327	Illumina NovaSeq 6000	AMPLICON	PCR
ERX4401850	ERR4461479	3	20200327	Illumina NovaSeq 6000	AMPLICON	PCR
ERX4401860	ERR4461489	3	20200327	Illumina NovaSeq 6000	AMPLICON	PCR
ERX4401873	ERR4461502	3	20200327	Illumina NovaSeq 6000	AMPLICON	PCR
ERX4401875	ERR4461504	3	20200327	Illumina NovaSeq 6000	AMPLICON	PCR
ERX4401895	ERR4461524	3	20200327	Illumina NovaSeq 6000	AMPLICON	PCR
ERX4401912	ERR4461541	3	20200327	Illumina NovaSeq 6000	AMPLICON	PCR
ERX4401927	ERR4461556	3	20200327	Illumina NovaSeq 6000	AMPLICON	PCR
ERX4402352	ERR4461981	3	20200327	Illumina NovaSeq 6000	AMPLICON	PCR
ERX4402442	ERR4462071	3	20200327	Illumina NovaSeq 6000	AMPLICON	PCR
ERX4402476	ERR4462105	3	20200327	Illumina NovaSeq 6000	AMPLICON	PCR
ERX4402488	ERR4462117	3	20200327	Illumina NovaSeq 6000	AMPLICON	PCR
ERX4402504	ERR4462133	3	20200327	Illumina NovaSeq 6000	AMPLICON	PCR
ERX4402548	ERR4462177	3	20200327	Illumina NovaSeq 6000	AMPLICON	PCR
ERX4402555	ERR4462184	3	20200327	Illumina NovaSeq 6000	AMPLICON	PCR
ERX4402960	ERR4462589	3	20200327	Illumina NovaSeq 6000	AMPLICON	PCR
ERX4402971	ERR4462600	3	20200327	Illumina NovaSeq 6000	AMPLICON	PCR
ERX4402990	ERR4462619	3	20200327	Illumina NovaSeq 6000	AMPLICON	PCR
ERX4517097	ERR4581557	3	20200327	Illumina NovaSeq 6000	AMPLICON	PCR
ERX4535908	ERR4603761	3	20200327	Illumina NovaSeq 6000	AMPLICON	PCR
ERX4535919	ERR4603772	3	20200327	Illumina NovaSeq 6000	AMPLICON	PCR
ERX4535932	ERR4603785	3	20200327	Illumina NovaSeq 6000	AMPLICON	PCR
ERX4536004	ERR4603857	3	20200327	Illumina NovaSeq 6000	AMPLICON	PCR
ERX4536006	ERR4603859	3	20200327	Illumina NovaSeq 6000	AMPLICON	PCR
ERX4536008	ERR4603861	3	20200327	Illumina NovaSeq 6000	AMPLICON	PCR
ERX4536270	ERR4604123	3	20200327	Illumina NovaSeq 6000	AMPLICON	PCR
ERX4536275	ERR4604128	3	20200327	Illumina NovaSeq 6000	AMPLICON	PCR
ERX4536287	ERR4604140	3	20200327	Illumina NovaSeq 6000	AMPLICON	PCR
ERX4545095	ERR4616054	3	20200327	Illumina NovaSeq 6000	AMPLICON	PCR
ERX4401663	ERR4461292	3	20200327	Illumina NovaSeq 6000	AMPLICON	PCR
ERX4378763	ERR4438260	3	20200327	Illumina NovaSeq 6000	AMPLICON	PCR
ERX4402497	ERR4462126	3	20200327	Illumina NovaSeq 6000	AMPLICON	PCR
ERX4401595	ERR4461224	3	20200327	Illumina NovaSeq 6000	AMPLICON	PCR
ERX4402409	ERR4462038	3	20200327	Illumina NovaSeq 6000	AMPLICON	PCR
ERX4365055	ERR4424497	3	20200327	Illumina NovaSeq 6000	AMPLICON	PCR
ERX4399590	ERR4459219	3	20200327	Illumina NovaSeq 6000	AMPLICON	PCR
ERX4401695	ERR4461324	3	20200327	Illumina NovaSeq 6000	AMPLICON	PCR
ERX4535862	ERR4603715	3	20200327	Illumina NovaSeq 6000	AMPLICON	PCR
ERX4377989	ERR4437486	3	20200327	Illumina NovaSeq 6000	AMPLICON	PCR
ERX4401766	ERR4461395	3	20200327	Illumina NovaSeq 6000	AMPLICON	PCR
ERX4360850	ERR4413714	3	20200328	Illumina NovaSeq 6000	AMPLICON	PCR
ERX4363131	ERR4422573	3	20200328	Illumina NovaSeq 6000	AMPLICON	PCR
ERX4363630	ERR4423072	3	20200328	Illumina NovaSeq 6000	AMPLICON	PCR
ERX4363672	ERR4423114	3	20200328	Illumina NovaSeq 6000	AMPLICON	PCR
ERX4363708	ERR4423150	3	20200328	Illumina NovaSeq 6000	AMPLICON	PCR
ERX4363740	ERR4423182	3	20200328	Illumina NovaSeq 6000	AMPLICON	PCR
ERX4363844	ERR4423286	3	20200328	Illumina NovaSeq 6000	AMPLICON	PCR
ERX4363875	ERR4423317	3	20200328	Illumina NovaSeq 6000	AMPLICON	PCR
ERX4363882	ERR4423324	3	20200328	Illumina NovaSeq 6000	AMPLICON	PCR
ERX4363898	ERR4423340	3	20200328	Illumina NovaSeq 6000	AMPLICON	PCR
ERX4365252	ERR4424694	3	20200328	Illumina NovaSeq 6000	AMPLICON	PCR
ERX4377981	ERR4437478	3	20200328	Illumina NovaSeq 6000	AMPLICON	PCR
ERX4378042	ERR4437539	3	20200328	Illumina NovaSeq 6000	AMPLICON	PCR
ERX4378074	ERR4437571	3	20200328	Illumina NovaSeq 6000	AMPLICON	PCR
ERX4378090	ERR4437587	3	20200328	Illumina NovaSeq 6000	AMPLICON	PCR
ERX4378091	ERR4437588	3	20200328	Illumina NovaSeq 6000	AMPLICON	PCR
ERX4378098	ERR4437595	3	20200328	Illumina NovaSeq 6000	AMPLICON	PCR
ERX4378270	ERR4437767	3	20200328	Illumina NovaSeq 6000	AMPLICON	PCR
ERX4378841	ERR4438338	3	20200328	Illumina NovaSeq 6000	AMPLICON	PCR
ERX4399225	ERR4458854	3	20200328	Illumina NovaSeq 6000	AMPLICON	PCR
ERX4399231	ERR4458860	3	20200328	Illumina NovaSeq 6000	AMPLICON	PCR
ERX4399246	ERR4458875	3	20200328	Illumina NovaSeq 6000	AMPLICON	PCR
ERX4399265	ERR4458894	3	20200328	Illumina NovaSeq 6000	AMPLICON	PCR
ERX4399271	ERR4458900	3	20200328	Illumina NovaSeq 6000	AMPLICON	PCR
ERX4399277	ERR4458906	3	20200328	Illumina NovaSeq 6000	AMPLICON	PCR
ERX4399298	ERR4458927	3	20200328	Illumina NovaSeq 6000	AMPLICON	PCR
ERX4399312	ERR4458941	3	20200328	Illumina NovaSeq 6000	AMPLICON	PCR
ERX4399330	ERR4458959	3	20200328	Illumina NovaSeq 6000	AMPLICON	PCR
ERX4399347	ERR4458976	3	20200328	Illumina NovaSeq 6000	AMPLICON	PCR
ERX4399352	ERR4458981	3	20200328	Illumina NovaSeq 6000	AMPLICON	PCR
ERX4399368	ERR4458997	3	20200328	Illumina NovaSeq 6000	AMPLICON	PCR
ERX4399385	ERR4459014	3	20200328	Illumina NovaSeq 6000	AMPLICON	PCR
ERX4399432	ERR4459061	3	20200328	Illumina NovaSeq 6000	AMPLICON	PCR
ERX4399523	ERR4459152	3	20200328	Illumina NovaSeq 6000	AMPLICON	PCR
ERX4399536	ERR4459165	3	20200328	Illumina NovaSeq 6000	AMPLICON	PCR
ERX4399599	ERR4459228	3	20200328	Illumina NovaSeq 6000	AMPLICON	PCR
ERX4399610	ERR4459239	3	20200328	Illumina NovaSeq 6000	AMPLICON	PCR
ERX4399612	ERR4459241	3	20200328	Illumina NovaSeq 6000	AMPLICON	PCR
ERX4399619	ERR4459248	3	20200328	Illumina NovaSeq 6000	AMPLICON	PCR
ERX4399639	ERR4459268	3	20200328	Illumina NovaSeq 6000	AMPLICON	PCR
ERX4399644	ERR4459273	3	20200328	Illumina NovaSeq 6000	AMPLICON	PCR
ERX4399648	ERR4459277	3	20200328	Illumina NovaSeq 6000	AMPLICON	PCR
ERX4399668	ERR4459297	3	20200328	Illumina NovaSeq 6000	AMPLICON	PCR
ERX4399669	ERR4459298	3	20200328	Illumina NovaSeq 6000	AMPLICON	PCR
ERX4399692	ERR4459321	3	20200328	Illumina NovaSeq 6000	AMPLICON	PCR
ERX4399709	ERR4459338	3	20200328	Illumina NovaSeq 6000	AMPLICON	PCR
ERX4399735	ERR4459364	3	20200328	Illumina NovaSeq 6000	AMPLICON	PCR
ERX4399751	ERR4459380	3	20200328	Illumina NovaSeq 6000	AMPLICON	PCR
ERX4399755	ERR4459384	3	20200328	Illumina NovaSeq 6000	AMPLICON	PCR
ERX4401614	ERR4461243	3	20200328	Illumina NovaSeq 6000	AMPLICON	PCR
ERX4401643	ERR4461272	3	20200328	Illumina NovaSeq 6000	AMPLICON	PCR
ERX4401652	ERR4461281	3	20200328	Illumina NovaSeq 6000	AMPLICON	PCR
ERX4401669	ERR4461298	3	20200328	Illumina NovaSeq 6000	AMPLICON	PCR
ERX4401677	ERR4461306	3	20200328	Illumina NovaSeq 6000	AMPLICON	PCR
ERX4401723	ERR4461352	3	20200328	Illumina NovaSeq 6000	AMPLICON	PCR
ERX4401726	ERR4461355	3	20200328	Illumina NovaSeq 6000	AMPLICON	PCR
ERX4401730	ERR4461359	3	20200328	Illumina NovaSeq 6000	AMPLICON	PCR
ERX4401739	ERR4461368	3	20200328	Illumina NovaSeq 6000	AMPLICON	PCR
ERX4401767	ERR4461396	3	20200328	Illumina NovaSeq 6000	AMPLICON	PCR
ERX4401776	ERR4461405	3	20200328	Illumina NovaSeq 6000	AMPLICON	PCR
ERX4401780	ERR4461409	3	20200328	Illumina NovaSeq 6000	AMPLICON	PCR
ERX4401811	ERR4461440	3	20200328	Illumina NovaSeq 6000	AMPLICON	PCR
ERX4401885	ERR4461514	3	20200328	Illumina NovaSeq 6000	AMPLICON	PCR
ERX4401918	ERR4461547	3	20200328	Illumina NovaSeq 6000	AMPLICON	PCR
ERX4402869	ERR4462498	3	20200328	Illumina NovaSeq 6000	AMPLICON	PCR
ERX4402882	ERR4462511	3	20200328	Illumina NovaSeq 6000	AMPLICON	PCR
ERX4402892	ERR4462521	3	20200328	Illumina NovaSeq 6000	AMPLICON	PCR
ERX4402927	ERR4462556	3	20200328	Illumina NovaSeq 6000	AMPLICON	PCR
ERX4402935	ERR4462564	3	20200328	Illumina NovaSeq 6000	AMPLICON	PCR
ERX4402944	ERR4462573	3	20200328	Illumina NovaSeq 6000	AMPLICON	PCR
ERX4402953	ERR4462582	3	20200328	Illumina NovaSeq 6000	AMPLICON	PCR
ERX4402998	ERR4462627	3	20200328	Illumina NovaSeq 6000	AMPLICON	PCR
ERX4516579	ERR4581040	3	20200328	Illumina NovaSeq 6000	AMPLICON	PCR
ERX4516660	ERR4581120	3	20200328	Illumina NovaSeq 6000	AMPLICON	PCR
ERX4516681	ERR4581141	3	20200328	Illumina NovaSeq 6000	AMPLICON	PCR
ERX4516683	ERR4581143	3	20200328	Illumina NovaSeq 6000	AMPLICON	PCR
ERX4517092	ERR4581552	3	20200328	Illumina NovaSeq 6000	AMPLICON	PCR
ERX4517120	ERR4581580	3	20200328	Illumina NovaSeq 6000	AMPLICON	PCR
ERX4517194	ERR4581654	3	20200328	Illumina NovaSeq 6000	AMPLICON	PCR
ERX4517195	ERR4581655	3	20200328	Illumina NovaSeq 6000	AMPLICON	PCR
ERX4535909	ERR4603762	3	20200328	Illumina NovaSeq 6000	AMPLICON	PCR
ERX4536279	ERR4604132	3	20200328	Illumina NovaSeq 6000	AMPLICON	PCR
ERX4536280	ERR4604133	3	20200328	Illumina NovaSeq 6000	AMPLICON	PCR
ERX4401830	ERR4461459	3	20200328	Illumina NovaSeq 6000	AMPLICON	PCR
ERX4399314	ERR4458943	3	20200328	Illumina NovaSeq 6000	AMPLICON	PCR
ERX4399350	ERR4458979	3	20200328	Illumina NovaSeq 6000	AMPLICON	PCR
ERX4399243	ERR4458872	3	20200328	Illumina NovaSeq 6000	AMPLICON	PCR
ERX4377970	ERR4437467	3	20200328	Illumina NovaSeq 6000	AMPLICON	PCR
ERX4401578	ERR4461207	3	20200328	Illumina NovaSeq 6000	AMPLICON	PCR
ERX4377984	ERR4437481	3	20200328	Illumina NovaSeq 6000	AMPLICON	PCR
ERX4363722	ERR4423164	3	20200328	Illumina NovaSeq 6000	AMPLICON	PCR
ERX4517094	ERR4581554	3	20200328	Illumina NovaSeq 6000	AMPLICON	PCR
ERX4363772	ERR4423214	3	20200328	Illumina NovaSeq 6000	AMPLICON	PCR
ERX4401808	ERR4461437	3	20200328	Illumina NovaSeq 6000	AMPLICON	PCR
ERX4377762	ERR4437259	3	20200328	Illumina NovaSeq 6000	AMPLICON	PCR
ERX4399659	ERR4459288	3	20200328	Illumina NovaSeq 6000	AMPLICON	PCR
ERX4401600	ERR4461229	3	20200328	Illumina NovaSeq 6000	AMPLICON	PCR
ERX4363656	ERR4423098	3	20200328	Illumina NovaSeq 6000	AMPLICON	PCR
ERX4363713	ERR4423155	3	20200328	Illumina NovaSeq 6000	AMPLICON	PCR
ERX4363884	ERR4423326	3	20200328	Illumina NovaSeq 6000	AMPLICON	PCR
ERX4360681	ERR4413545	3	20200329	Illumina NovaSeq 6000	AMPLICON	PCR
ERX4360749	ERR4413613	3	20200329	Illumina NovaSeq 6000	AMPLICON	PCR
ERX4360828	ERR4413692	3	20200329	Illumina NovaSeq 6000	AMPLICON	PCR
ERX4360863	ERR4413727	3	20200329	Illumina NovaSeq 6000	AMPLICON	PCR
ERX4363153	ERR4422595	3	20200329	Illumina NovaSeq 6000	AMPLICON	PCR
ERX4363645	ERR4423087	3	20200329	Illumina NovaSeq 6000	AMPLICON	PCR
ERX4363649	ERR4423091	3	20200329	Illumina NovaSeq 6000	AMPLICON	PCR
ERX4363751	ERR4423193	3	20200329	Illumina NovaSeq 6000	AMPLICON	PCR
ERX4363775	ERR4423217	3	20200329	Illumina NovaSeq 6000	AMPLICON	PCR
ERX4363789	ERR4423231	3	20200329	Illumina NovaSeq 6000	AMPLICON	PCR
ERX4365319	ERR4424761	3	20200329	Illumina NovaSeq 6000	AMPLICON	PCR
ERX4377972	ERR4437469	3	20200329	Illumina NovaSeq 6000	AMPLICON	PCR
ERX4378050	ERR4437547	3	20200329	Illumina NovaSeq 6000	AMPLICON	PCR
ERX4378255	ERR4437752	3	20200329	Illumina NovaSeq 6000	AMPLICON	PCR
ERX4378300	ERR4437797	3	20200329	Illumina NovaSeq 6000	AMPLICON	PCR
ERX4378702	ERR4438199	3	20200329	Illumina NovaSeq 6000	AMPLICON	PCR
ERX4399279	ERR4458908	3	20200329	Illumina NovaSeq 6000	AMPLICON	PCR
ERX4399282	ERR4458911	3	20200329	Illumina NovaSeq 6000	AMPLICON	PCR
ERX4399316	ERR4458945	3	20200329	Illumina NovaSeq 6000	AMPLICON	PCR
ERX4399323	ERR4458952	3	20200329	Illumina NovaSeq 6000	AMPLICON	PCR
ERX4399356	ERR4458985	3	20200329	Illumina NovaSeq 6000	AMPLICON	PCR
ERX4399361	ERR4458990	3	20200329	Illumina NovaSeq 6000	AMPLICON	PCR
ERX4399503	ERR4459132	3	20200329	Illumina NovaSeq 6000	AMPLICON	PCR
ERX4399509	ERR4459138	3	20200329	Illumina NovaSeq 6000	AMPLICON	PCR
ERX4399531	ERR4459160	3	20200329	Illumina NovaSeq 6000	AMPLICON	PCR
ERX4399541	ERR4459170	3	20200329	Illumina NovaSeq 6000	AMPLICON	PCR
ERX4399544	ERR4459173	3	20200329	Illumina NovaSeq 6000	AMPLICON	PCR
ERX4399552	ERR4459181	3	20200329	Illumina NovaSeq 6000	AMPLICON	PCR
ERX4399556	ERR4459185	3	20200329	Illumina NovaSeq 6000	AMPLICON	PCR
ERX4399559	ERR4459188	3	20200329	Illumina NovaSeq 6000	AMPLICON	PCR
ERX4399566	ERR4459195	3	20200329	Illumina NovaSeq 6000	AMPLICON	PCR
ERX4399571	ERR4459200	3	20200329	Illumina NovaSeq 6000	AMPLICON	PCR
ERX4399577	ERR4459206	3	20200329	Illumina NovaSeq 6000	AMPLICON	PCR
ERX4399581	ERR4459210	3	20200329	Illumina NovaSeq 6000	AMPLICON	PCR
ERX4399594	ERR4459223	3	20200329	Illumina NovaSeq 6000	AMPLICON	PCR
ERX4399598	ERR4459227	3	20200329	Illumina NovaSeq 6000	AMPLICON	PCR
ERX4399602	ERR4459231	3	20200329	Illumina NovaSeq 6000	AMPLICON	PCR
ERX4399617	ERR4459246	3	20200329	Illumina NovaSeq 6000	AMPLICON	PCR
ERX4399624	ERR4459253	3	20200329	Illumina NovaSeq 6000	AMPLICON	PCR
ERX4399635	ERR4459264	3	20200329	Illumina NovaSeq 6000	AMPLICON	PCR
ERX4399637	ERR4459266	3	20200329	Illumina NovaSeq 6000	AMPLICON	PCR
ERX4399654	ERR4459283	3	20200329	Illumina NovaSeq 6000	AMPLICON	PCR
ERX4399677	ERR4459306	3	20200329	Illumina NovaSeq 6000	AMPLICON	PCR
ERX4399691	ERR4459320	3	20200329	Illumina NovaSeq 6000	AMPLICON	PCR
ERX4399703	ERR4459332	3	20200329	Illumina NovaSeq 6000	AMPLICON	PCR
ERX4399721	ERR4459350	3	20200329	Illumina NovaSeq 6000	AMPLICON	PCR
ERX4399729	ERR4459358	3	20200329	Illumina NovaSeq 6000	AMPLICON	PCR
ERX4399738	ERR4459367	3	20200329	Illumina NovaSeq 6000	AMPLICON	PCR
ERX4399739	ERR4459368	3	20200329	Illumina NovaSeq 6000	AMPLICON	PCR
ERX4399750	ERR4459379	3	20200329	Illumina NovaSeq 6000	AMPLICON	PCR
ERX4401622	ERR4461251	3	20200329	Illumina NovaSeq 6000	AMPLICON	PCR
ERX4401653	ERR4461282	3	20200329	Illumina NovaSeq 6000	AMPLICON	PCR
ERX4401671	ERR4461300	3	20200329	Illumina NovaSeq 6000	AMPLICON	PCR
ERX4401702	ERR4461331	3	20200329	Illumina NovaSeq 6000	AMPLICON	PCR
ERX4401801	ERR4461430	3	20200329	Illumina NovaSeq 6000	AMPLICON	PCR
ERX4401863	ERR4461492	3	20200329	Illumina NovaSeq 6000	AMPLICON	PCR
ERX4401869	ERR4461498	3	20200329	Illumina NovaSeq 6000	AMPLICON	PCR
ERX4401878	ERR4461507	3	20200329	Illumina NovaSeq 6000	AMPLICON	PCR
ERX4401883	ERR4461512	3	20200329	Illumina NovaSeq 6000	AMPLICON	PCR
ERX4401889	ERR4461518	3	20200329	Illumina NovaSeq 6000	AMPLICON	PCR
ERX4401900	ERR4461529	3	20200329	Illumina NovaSeq 6000	AMPLICON	PCR
ERX4402881	ERR4462510	3	20200329	Illumina NovaSeq 6000	AMPLICON	PCR
ERX4402887	ERR4462516	3	20200329	Illumina NovaSeq 6000	AMPLICON	PCR
ERX4402974	ERR4462603	3	20200329	Illumina NovaSeq 6000	AMPLICON	PCR
ERX4402976	ERR4462605	3	20200329	Illumina NovaSeq 6000	AMPLICON	PCR
ERX4402980	ERR4462609	3	20200329	Illumina NovaSeq 6000	AMPLICON	PCR
ERX4402984	ERR4462613	3	20200329	Illumina NovaSeq 6000	AMPLICON	PCR
ERX4402996	ERR4462625	3	20200329	Illumina NovaSeq 6000	AMPLICON	PCR
ERX4516678	ERR4581138	3	20200329	Illumina NovaSeq 6000	AMPLICON	PCR
ERX4516680	ERR4581140	3	20200329	Illumina NovaSeq 6000	AMPLICON	PCR
ERX4517080	ERR4581540	3	20200329	Illumina NovaSeq 6000	AMPLICON	PCR
ERX4517082	ERR4581542	3	20200329	Illumina NovaSeq 6000	AMPLICON	PCR
ERX4517095	ERR4581555	3	20200329	Illumina NovaSeq 6000	AMPLICON	PCR
ERX4517118	ERR4581578	3	20200329	Illumina NovaSeq 6000	AMPLICON	PCR
ERX4517152	ERR4581612	3	20200329	Illumina NovaSeq 6000	AMPLICON	PCR
ERX4517210	ERR4581670	3	20200329	Illumina NovaSeq 6000	AMPLICON	PCR
ERX4517214	ERR4581674	3	20200329	Illumina NovaSeq 6000	AMPLICON	PCR
ERX4517231	ERR4581691	3	20200329	Illumina NovaSeq 6000	AMPLICON	PCR
ERX4535921	ERR4603774	3	20200329	Illumina NovaSeq 6000	AMPLICON	PCR
ERX4536023	ERR4603876	3	20200329	Illumina NovaSeq 6000	AMPLICON	PCR
ERX4536258	ERR4604111	3	20200329	Illumina NovaSeq 6000	AMPLICON	PCR
ERX4536289	ERR4604142	3	20200329	Illumina NovaSeq 6000	AMPLICON	PCR
ERX4536290	ERR4604143	3	20200329	Illumina NovaSeq 6000	AMPLICON	PCR
ERX4545090	ERR4616049	3	20200329	Illumina NovaSeq 6000	AMPLICON	PCR
ERX4363625	ERR4423067	3	20200329	Illumina NovaSeq 6000	AMPLICON	PCR
ERX4536286	ERR4604139	3	20200329	Illumina NovaSeq 6000	AMPLICON	PCR
ERX4401838	ERR4461467	3	20200329	Illumina NovaSeq 6000	AMPLICON	PCR
ERX4399430	ERR4459059	3	20200329	Illumina NovaSeq 6000	AMPLICON	PCR
ERX4401893	ERR4461522	3	20200329	Illumina NovaSeq 6000	AMPLICON	PCR
ERX4402986	ERR4462615	3	20200329	Illumina NovaSeq 6000	AMPLICON	PCR
ERX4401588	ERR4461217	3	20200329	Illumina NovaSeq 6000	AMPLICON	PCR
ERX4399546	ERR4459175	3	20200329	Illumina NovaSeq 6000	AMPLICON	PCR
ERX4378289	ERR4437786	3	20200329	Illumina NovaSeq 6000	AMPLICON	PCR
ERX4378291	ERR4437788	3	20200329	Illumina NovaSeq 6000	AMPLICON	PCR
ERX4401581	ERR4461210	3	20200329	Illumina NovaSeq 6000	AMPLICON	PCR
ERX4402890	ERR4462519	3	20200329	Illumina NovaSeq 6000	AMPLICON	PCR
ERX4399241	ERR4458870	3	20200329	Illumina NovaSeq 6000	AMPLICON	PCR
ERX4360672	ERR4413536	3	20200330	Illumina NovaSeq 6000	AMPLICON	PCR
ERX4360680	ERR4413544	3	20200330	Illumina NovaSeq 6000	AMPLICON	PCR
ERX4360685	ERR4413549	3	20200330	Illumina NovaSeq 6000	AMPLICON	PCR
ERX4360723	ERR4413587	3	20200330	Illumina NovaSeq 6000	AMPLICON	PCR
ERX4360770	ERR4413634	3	20200330	Illumina NovaSeq 6000	AMPLICON	PCR
ERX4360818	ERR4413682	3	20200330	Illumina NovaSeq 6000	AMPLICON	PCR
ERX4360847	ERR4413711	3	20200330	Illumina NovaSeq 6000	AMPLICON	PCR
ERX4360872	ERR4413736	3	20200330	Illumina NovaSeq 6000	AMPLICON	PCR
ERX4363118	ERR4422560	3	20200330	Illumina NovaSeq 6000	AMPLICON	PCR
ERX4363631	ERR4423073	3	20200330	Illumina NovaSeq 6000	AMPLICON	PCR
ERX4363706	ERR4423148	3	20200330	Illumina NovaSeq 6000	AMPLICON	PCR
ERX4363771	ERR4423213	3	20200330	Illumina NovaSeq 6000	AMPLICON	PCR
ERX4363888	ERR4423330	3	20200330	Illumina NovaSeq 6000	AMPLICON	PCR
ERX4363892	ERR4423334	3	20200330	Illumina NovaSeq 6000	AMPLICON	PCR
ERX4364592	ERR4424034	3	20200330	Illumina NovaSeq 6000	AMPLICON	PCR
ERX4364965	ERR4424407	3	20200330	Illumina NovaSeq 6000	AMPLICON	PCR
ERX4365748	ERR4425190	3	20200330	Illumina NovaSeq 6000	AMPLICON	PCR
ERX4378254	ERR4437751	3	20200330	Illumina NovaSeq 6000	AMPLICON	PCR
ERX4378256	ERR4437753	3	20200330	Illumina NovaSeq 6000	AMPLICON	PCR
ERX4378258	ERR4437755	3	20200330	Illumina NovaSeq 6000	AMPLICON	PCR
ERX4378267	ERR4437764	3	20200330	Illumina NovaSeq 6000	AMPLICON	PCR
ERX4378269	ERR4437766	3	20200330	Illumina NovaSeq 6000	AMPLICON	PCR
ERX4378278	ERR4437775	3	20200330	Illumina NovaSeq 6000	AMPLICON	PCR
ERX4378281	ERR4437778	3	20200330	Illumina NovaSeq 6000	AMPLICON	PCR
ERX4378282	ERR4437779	3	20200330	Illumina NovaSeq 6000	AMPLICON	PCR
ERX4378287	ERR4437784	3	20200330	Illumina NovaSeq 6000	AMPLICON	PCR
ERX4378294	ERR4437791	3	20200330	Illumina NovaSeq 6000	AMPLICON	PCR
ERX4378301	ERR4437798	3	20200330	Illumina NovaSeq 6000	AMPLICON	PCR
ERX4378305	ERR4437802	3	20200330	Illumina NovaSeq 6000	AMPLICON	PCR
ERX4378309	ERR4437806	3	20200330	Illumina NovaSeq 6000	AMPLICON	PCR
ERX4378311	ERR4437808	3	20200330	Illumina NovaSeq 6000	AMPLICON	PCR
ERX4378321	ERR4437818	3	20200330	Illumina NovaSeq 6000	AMPLICON	PCR
ERX4378805	ERR4438302	3	20200330	Illumina NovaSeq 6000	AMPLICON	PCR
ERX4378812	ERR4438309	3	20200330	Illumina NovaSeq 6000	AMPLICON	PCR
ERX4398878	ERR4458507	3	20200330	Illumina NovaSeq 6000	AMPLICON	PCR
ERX4398887	ERR4458516	3	20200330	Illumina NovaSeq 6000	AMPLICON	PCR
ERX4399255	ERR4458884	3	20200330	Illumina NovaSeq 6000	AMPLICON	PCR
ERX4399313	ERR4458942	3	20200330	Illumina NovaSeq 6000	AMPLICON	PCR
ERX4399387	ERR4459016	3	20200330	Illumina NovaSeq 6000	AMPLICON	PCR
ERX4399515	ERR4459144	3	20200330	Illumina NovaSeq 6000	AMPLICON	PCR
ERX4399519	ERR4459148	3	20200330	Illumina NovaSeq 6000	AMPLICON	PCR
ERX4399530	ERR4459159	3	20200330	Illumina NovaSeq 6000	AMPLICON	PCR
ERX4399545	ERR4459174	3	20200330	Illumina NovaSeq 6000	AMPLICON	PCR
ERX4399557	ERR4459186	3	20200330	Illumina NovaSeq 6000	AMPLICON	PCR
ERX4399572	ERR4459201	3	20200330	Illumina NovaSeq 6000	AMPLICON	PCR
ERX4399592	ERR4459221	3	20200330	Illumina NovaSeq 6000	AMPLICON	PCR
ERX4399607	ERR4459236	3	20200330	Illumina NovaSeq 6000	AMPLICON	PCR
ERX4399613	ERR4459242	3	20200330	Illumina NovaSeq 6000	AMPLICON	PCR
ERX4399647	ERR4459276	3	20200330	Illumina NovaSeq 6000	AMPLICON	PCR
ERX4399653	ERR4459282	3	20200330	Illumina NovaSeq 6000	AMPLICON	PCR
ERX4399656	ERR4459285	3	20200330	Illumina NovaSeq 6000	AMPLICON	PCR
ERX4399666	ERR4459295	3	20200330	Illumina NovaSeq 6000	AMPLICON	PCR
ERX4399671	ERR4459300	3	20200330	Illumina NovaSeq 6000	AMPLICON	PCR
ERX4399695	ERR4459324	3	20200330	Illumina NovaSeq 6000	AMPLICON	PCR
ERX4399746	ERR4459375	3	20200330	Illumina NovaSeq 6000	AMPLICON	PCR
ERX4399747	ERR4459376	3	20200330	Illumina NovaSeq 6000	AMPLICON	PCR
ERX4399754	ERR4459383	3	20200330	Illumina NovaSeq 6000	AMPLICON	PCR
ERX4399756	ERR4459385	3	20200330	Illumina NovaSeq 6000	AMPLICON	PCR
ERX4401580	ERR4461209	3	20200330	Illumina NovaSeq 6000	AMPLICON	PCR
ERX4401598	ERR4461227	3	20200330	Illumina NovaSeq 6000	AMPLICON	PCR
ERX4401658	ERR4461287	3	20200330	Illumina NovaSeq 6000	AMPLICON	PCR
ERX4401672	ERR4461301	3	20200330	Illumina NovaSeq 6000	AMPLICON	PCR
ERX4401678	ERR4461307	3	20200330	Illumina NovaSeq 6000	AMPLICON	PCR
ERX4401714	ERR4461343	3	20200330	Illumina NovaSeq 6000	AMPLICON	PCR
ERX4401721	ERR4461350	3	20200330	Illumina NovaSeq 6000	AMPLICON	PCR
ERX4401748	ERR4461377	3	20200330	Illumina NovaSeq 6000	AMPLICON	PCR
ERX4401800	ERR4461429	3	20200330	Illumina NovaSeq 6000	AMPLICON	PCR
ERX4401804	ERR4461433	3	20200330	Illumina NovaSeq 6000	AMPLICON	PCR
ERX4401819	ERR4461448	3	20200330	Illumina NovaSeq 6000	AMPLICON	PCR
ERX4401825	ERR4461454	3	20200330	Illumina NovaSeq 6000	AMPLICON	PCR
ERX4401827	ERR4461456	3	20200330	Illumina NovaSeq 6000	AMPLICON	PCR
ERX4401852	ERR4461481	3	20200330	Illumina NovaSeq 6000	AMPLICON	PCR
ERX4401920	ERR4461549	3	20200330	Illumina NovaSeq 6000	AMPLICON	PCR
ERX4402915	ERR4462544	3	20200330	Illumina NovaSeq 6000	AMPLICON	PCR
ERX4402963	ERR4462592	3	20200330	Illumina NovaSeq 6000	AMPLICON	PCR
ERX4403189	ERR4462818	3	20200330	Illumina NovaSeq 6000	AMPLICON	PCR
ERX4517078	ERR4581538	3	20200330	Illumina NovaSeq 6000	AMPLICON	PCR
ERX4535870	ERR4603723	3	20200330	Illumina NovaSeq 6000	AMPLICON	PCR
ERX4535914	ERR4603767	3	20200330	Illumina NovaSeq 6000	AMPLICON	PCR
ERX4536214	ERR4604067	3	20200330	Illumina NovaSeq 6000	AMPLICON	PCR
ERX4536242	ERR4604095	3	20200330	Illumina NovaSeq 6000	AMPLICON	PCR
ERX4536302	ERR4604155	3	20200330	Illumina NovaSeq 6000	AMPLICON	PCR
ERX4399681	ERR4459310	3	20200330	Illumina NovaSeq 6000	AMPLICON	PCR
ERX4360861	ERR4413725	3	20200330	Illumina NovaSeq 6000	AMPLICON	PCR
ERX4378303	ERR4437800	3	20200330	Illumina NovaSeq 6000	AMPLICON	PCR
ERX4360688	ERR4413552	3	20200330	Illumina NovaSeq 6000	AMPLICON	PCR
ERX4401691	ERR4461320	3	20200330	Illumina NovaSeq 6000	AMPLICON	PCR
ERX4360790	ERR4413654	3	20200330	Illumina NovaSeq 6000	AMPLICON	PCR
ERX4360700	ERR4413564	3	20200330	Illumina NovaSeq 6000	AMPLICON	PCR
ERX4399694	ERR4459323	3	20200330	Illumina NovaSeq 6000	AMPLICON	PCR
ERX4378322	ERR4437819	3	20200330	Illumina NovaSeq 6000	AMPLICON	PCR
ERX4378251	ERR4437748	3	20200330	Illumina NovaSeq 6000	AMPLICON	PCR
ERX4401684	ERR4461313	3	20200330	Illumina NovaSeq 6000	AMPLICON	PCR
ERX4399708	ERR4459337	3	20200330	Illumina NovaSeq 6000	AMPLICON	PCR
ERX4360677	ERR4413541	3	20200330	Illumina NovaSeq 6000	AMPLICON	PCR
ERX4401836	ERR4461465	3	20200330	Illumina NovaSeq 6000	AMPLICON	PCR
ERX4360824	ERR4413688	3	20200330	Illumina NovaSeq 6000	AMPLICON	PCR
ERX4401750	ERR4461379	3	20200330	Illumina NovaSeq 6000	AMPLICON	PCR
ERX4360668	ERR4413532	3	20200331	Illumina NovaSeq 6000	AMPLICON	PCR
ERX4360686	ERR4413550	3	20200331	Illumina NovaSeq 6000	AMPLICON	PCR
ERX4360687	ERR4413551	3	20200331	Illumina NovaSeq 6000	AMPLICON	PCR
ERX4360694	ERR4413558	3	20200331	Illumina NovaSeq 6000	AMPLICON	PCR
ERX4360704	ERR4413568	3	20200331	Illumina NovaSeq 6000	AMPLICON	PCR
ERX4360705	ERR4413569	3	20200331	Illumina NovaSeq 6000	AMPLICON	PCR
ERX4360706	ERR4413570	3	20200331	Illumina NovaSeq 6000	AMPLICON	PCR
ERX4360718	ERR4413582	3	20200331	Illumina NovaSeq 6000	AMPLICON	PCR
ERX4360719	ERR4413583	3	20200331	Illumina NovaSeq 6000	AMPLICON	PCR
ERX4360728	ERR4413592	3	20200331	Illumina NovaSeq 6000	AMPLICON	PCR
ERX4360741	ERR4413605	3	20200331	Illumina NovaSeq 6000	AMPLICON	PCR
ERX4360751	ERR4413615	3	20200331	Illumina NovaSeq 6000	AMPLICON	PCR
ERX4360752	ERR4413616	3	20200331	Illumina NovaSeq 6000	AMPLICON	PCR
ERX4360756	ERR4413620	3	20200331	Illumina NovaSeq 6000	AMPLICON	PCR
ERX4360761	ERR4413625	3	20200331	Illumina NovaSeq 6000	AMPLICON	PCR
ERX4360768	ERR4413632	3	20200331	Illumina NovaSeq 6000	AMPLICON	PCR
ERX4360769	ERR4413633	3	20200331	Illumina NovaSeq 6000	AMPLICON	PCR
ERX4360777	ERR4413641	3	20200331	Illumina NovaSeq 6000	AMPLICON	PCR
ERX4360779	ERR4413643	3	20200331	Illumina NovaSeq 6000	AMPLICON	PCR
ERX4360815	ERR4413679	3	20200331	Illumina NovaSeq 6000	AMPLICON	PCR
ERX4360826	ERR4413690	3	20200331	Illumina NovaSeq 6000	AMPLICON	PCR
ERX4360834	ERR4413698	3	20200331	Illumina NovaSeq 6000	AMPLICON	PCR
ERX4360837	ERR4413701	3	20200331	Illumina NovaSeq 6000	AMPLICON	PCR
ERX4360839	ERR4413703	3	20200331	Illumina NovaSeq 6000	AMPLICON	PCR
ERX4360851	ERR4413715	3	20200331	Illumina NovaSeq 6000	AMPLICON	PCR
ERX4360867	ERR4413731	3	20200331	Illumina NovaSeq 6000	AMPLICON	PCR
ERX4363684	ERR4423126	3	20200331	Illumina NovaSeq 6000	AMPLICON	PCR
ERX4363695	ERR4423137	3	20200331	Illumina NovaSeq 6000	AMPLICON	PCR
ERX4363698	ERR4423140	3	20200331	Illumina NovaSeq 6000	AMPLICON	PCR
ERX4363762	ERR4423204	3	20200331	Illumina NovaSeq 6000	AMPLICON	PCR
ERX4363818	ERR4423260	3	20200331	Illumina NovaSeq 6000	AMPLICON	PCR
ERX4363826	ERR4423268	3	20200331	Illumina NovaSeq 6000	AMPLICON	PCR
ERX4363830	ERR4423272	3	20200331	Illumina NovaSeq 6000	AMPLICON	PCR
ERX4363860	ERR4423302	3	20200331	Illumina NovaSeq 6000	AMPLICON	PCR
ERX4363861	ERR4423303	3	20200331	Illumina NovaSeq 6000	AMPLICON	PCR
ERX4363899	ERR4423341	3	20200331	Illumina NovaSeq 6000	AMPLICON	PCR
ERX4364971	ERR4424413	3	20200331	Illumina NovaSeq 6000	AMPLICON	PCR
ERX4365105	ERR4424547	3	20200331	Illumina NovaSeq 6000	AMPLICON	PCR
ERX4365139	ERR4424581	3	20200331	Illumina NovaSeq 6000	AMPLICON	PCR
ERX4378252	ERR4437749	3	20200331	Illumina NovaSeq 6000	AMPLICON	PCR
ERX4378265	ERR4437762	3	20200331	Illumina NovaSeq 6000	AMPLICON	PCR
ERX4378307	ERR4437804	3	20200331	Illumina NovaSeq 6000	AMPLICON	PCR
ERX4378318	ERR4437815	3	20200331	Illumina NovaSeq 6000	AMPLICON	PCR
ERX4378679	ERR4438176	3	20200331	Illumina NovaSeq 6000	AMPLICON	PCR
ERX4378740	ERR4438237	3	20200331	Illumina NovaSeq 6000	AMPLICON	PCR
ERX4378744	ERR4438241	3	20200331	Illumina NovaSeq 6000	AMPLICON	PCR
ERX4378749	ERR4438246	3	20200331	Illumina NovaSeq 6000	AMPLICON	PCR
ERX4378820	ERR4438317	3	20200331	Illumina NovaSeq 6000	AMPLICON	PCR
ERX4398506	ERR4458135	3	20200331	Illumina NovaSeq 6000	AMPLICON	PCR
ERX4398524	ERR4458153	3	20200331	Illumina NovaSeq 6000	AMPLICON	PCR
ERX4398595	ERR4458224	3	20200331	Illumina NovaSeq 6000	AMPLICON	PCR
ERX4398610	ERR4458239	3	20200331	Illumina NovaSeq 6000	AMPLICON	PCR
ERX4398627	ERR4458256	3	20200331	Illumina NovaSeq 6000	AMPLICON	PCR
ERX4399081	ERR4458710	3	20200331	Illumina NovaSeq 6000	AMPLICON	PCR
ERX4399201	ERR4458830	3	20200331	Illumina NovaSeq 6000	AMPLICON	PCR
ERX4399222	ERR4458851	3	20200331	Illumina NovaSeq 6000	AMPLICON	PCR
ERX4399309	ERR4458938	3	20200331	Illumina NovaSeq 6000	AMPLICON	PCR
ERX4399424	ERR4459053	3	20200331	Illumina NovaSeq 6000	AMPLICON	PCR
ERX4399426	ERR4459055	3	20200331	Illumina NovaSeq 6000	AMPLICON	PCR
ERX4399457	ERR4459086	3	20200331	Illumina NovaSeq 6000	AMPLICON	PCR
ERX4399482	ERR4459111	3	20200331	Illumina NovaSeq 6000	AMPLICON	PCR
ERX4399494	ERR4459123	3	20200331	Illumina NovaSeq 6000	AMPLICON	PCR
ERX4399511	ERR4459140	3	20200331	Illumina NovaSeq 6000	AMPLICON	PCR
ERX4399526	ERR4459155	3	20200331	Illumina NovaSeq 6000	AMPLICON	PCR
ERX4399563	ERR4459192	3	20200331	Illumina NovaSeq 6000	AMPLICON	PCR
ERX4399587	ERR4459216	3	20200331	Illumina NovaSeq 6000	AMPLICON	PCR
ERX4399631	ERR4459260	3	20200331	Illumina NovaSeq 6000	AMPLICON	PCR
ERX4399673	ERR4459302	3	20200331	Illumina NovaSeq 6000	AMPLICON	PCR
ERX4399713	ERR4459342	3	20200331	Illumina NovaSeq 6000	AMPLICON	PCR
ERX4399730	ERR4459359	3	20200331	Illumina NovaSeq 6000	AMPLICON	PCR
ERX4399737	ERR4459366	3	20200331	Illumina NovaSeq 6000	AMPLICON	PCR
ERX4400123	ERR4459752	3	20200331	Illumina NovaSeq 6000	AMPLICON	PCR
ERX4400319	ERR4459948	3	20200331	Illumina NovaSeq 6000	AMPLICON	PCR
ERX4400428	ERR4460057	3	20200331	Illumina NovaSeq 6000	AMPLICON	PCR
ERX4400524	ERR4460153	3	20200331	Illumina NovaSeq 6000	AMPLICON	PCR
ERX4402902	ERR4462531	3	20200331	Illumina NovaSeq 6000	AMPLICON	PCR
ERX4402906	ERR4462535	3	20200331	Illumina NovaSeq 6000	AMPLICON	PCR
ERX4402930	ERR4462559	3	20200331	Illumina NovaSeq 6000	AMPLICON	PCR
ERX4402931	ERR4462560	3	20200331	Illumina NovaSeq 6000	AMPLICON	PCR
ERX4402932	ERR4462561	3	20200331	Illumina NovaSeq 6000	AMPLICON	PCR
ERX4402954	ERR4462583	3	20200331	Illumina NovaSeq 6000	AMPLICON	PCR
ERX4402956	ERR4462585	3	20200331	Illumina NovaSeq 6000	AMPLICON	PCR
ERX4402972	ERR4462601	3	20200331	Illumina NovaSeq 6000	AMPLICON	PCR
ERX4403058	ERR4462687	3	20200331	Illumina NovaSeq 6000	AMPLICON	PCR
ERX4403148	ERR4462777	3	20200331	Illumina NovaSeq 6000	AMPLICON	PCR
ERX4403194	ERR4462823	3	20200331	Illumina NovaSeq 6000	AMPLICON	PCR
ERX4403202	ERR4462831	3	20200331	Illumina NovaSeq 6000	AMPLICON	PCR
ERX4403204	ERR4462833	3	20200331	Illumina NovaSeq 6000	AMPLICON	PCR
ERX4535860	ERR4603713	3	20200331	Illumina NovaSeq 6000	AMPLICON	PCR
ERX4535949	ERR4603802	3	20200331	Illumina NovaSeq 6000	AMPLICON	PCR
ERX4535993	ERR4603846	3	20200331	Illumina NovaSeq 6000	AMPLICON	PCR
ERX4536049	ERR4603902	3	20200331	Illumina NovaSeq 6000	AMPLICON	PCR
ERX4536249	ERR4604102	3	20200331	Illumina NovaSeq 6000	AMPLICON	PCR
ERX4545084	ERR4616043	3	20200331	Illumina NovaSeq 6000	AMPLICON	PCR
ERX4545108	ERR4616067	3	20200331	Illumina NovaSeq 6000	AMPLICON	PCR
ERX4360747	ERR4413611	3	20200331	Illumina NovaSeq 6000	AMPLICON	PCR
ERX4365345	ERR4424787	3	20200331	Illumina NovaSeq 6000	AMPLICON	PCR
ERX4360825	ERR4413689	3	20200331	Illumina NovaSeq 6000	AMPLICON	PCR
ERX4360816	ERR4413680	3	20200331	Illumina NovaSeq 6000	AMPLICON	PCR
ERX4363811	ERR4423253	3	20200331	Illumina NovaSeq 6000	AMPLICON	PCR
ERX4276047	ERR4329213	3	20200401	Illumina NovaSeq 6000	AMPLICON	PCR
ERX4276093	ERR4329259	3	20200401	Illumina NovaSeq 6000	AMPLICON	PCR
ERX4276149	ERR4329315	3	20200401	Illumina NovaSeq 6000	AMPLICON	PCR
ERX4276160	ERR4329326	3	20200401	Illumina NovaSeq 6000	AMPLICON	PCR
ERX4276183	ERR4329349	3	20200401	Illumina NovaSeq 6000	AMPLICON	PCR
ERX4276220	ERR4329386	3	20200401	Illumina NovaSeq 6000	AMPLICON	PCR
ERX4276239	ERR4329405	3	20200401	Illumina NovaSeq 6000	AMPLICON	PCR
ERX4276264	ERR4329430	3	20200401	Illumina NovaSeq 6000	AMPLICON	PCR
ERX4360670	ERR4413534	3	20200401	Illumina NovaSeq 6000	AMPLICON	PCR
ERX4360678	ERR4413542	3	20200401	Illumina NovaSeq 6000	AMPLICON	PCR
ERX4360682	ERR4413546	3	20200401	Illumina NovaSeq 6000	AMPLICON	PCR
ERX4360683	ERR4413547	3	20200401	Illumina NovaSeq 6000	AMPLICON	PCR
ERX4360698	ERR4413562	3	20200401	Illumina NovaSeq 6000	AMPLICON	PCR
ERX4360708	ERR4413572	3	20200401	Illumina NovaSeq 6000	AMPLICON	PCR
ERX4360709	ERR4413573	3	20200401	Illumina NovaSeq 6000	AMPLICON	PCR
ERX4360714	ERR4413578	3	20200401	Illumina NovaSeq 6000	AMPLICON	PCR
ERX4360716	ERR4413580	3	20200401	Illumina NovaSeq 6000	AMPLICON	PCR
ERX4360767	ERR4413631	3	20200401	Illumina NovaSeq 6000	AMPLICON	PCR
ERX4360772	ERR4413636	3	20200401	Illumina NovaSeq 6000	AMPLICON	PCR
ERX4360773	ERR4413637	3	20200401	Illumina NovaSeq 6000	AMPLICON	PCR
ERX4360775	ERR4413639	3	20200401	Illumina NovaSeq 6000	AMPLICON	PCR
ERX4360782	ERR4413646	3	20200401	Illumina NovaSeq 6000	AMPLICON	PCR
ERX4360785	ERR4413649	3	20200401	Illumina NovaSeq 6000	AMPLICON	PCR
ERX4360807	ERR4413671	3	20200401	Illumina NovaSeq 6000	AMPLICON	PCR
ERX4360821	ERR4413685	3	20200401	Illumina NovaSeq 6000	AMPLICON	PCR
ERX4360830	ERR4413694	3	20200401	Illumina NovaSeq 6000	AMPLICON	PCR
ERX4360860	ERR4413724	3	20200401	Illumina NovaSeq 6000	AMPLICON	PCR
ERX4360862	ERR4413726	3	20200401	Illumina NovaSeq 6000	AMPLICON	PCR
ERX4360873	ERR4413737	3	20200401	Illumina NovaSeq 6000	AMPLICON	PCR
ERX4360897	ERR4413761	3	20200401	Illumina NovaSeq 6000	AMPLICON	PCR
ERX4363719	ERR4423161	3	20200401	Illumina NovaSeq 6000	AMPLICON	PCR
ERX4363726	ERR4423168	3	20200401	Illumina NovaSeq 6000	AMPLICON	PCR
ERX4363735	ERR4423177	3	20200401	Illumina NovaSeq 6000	AMPLICON	PCR
ERX4363800	ERR4423242	3	20200401	Illumina NovaSeq 6000	AMPLICON	PCR
ERX4363835	ERR4423277	3	20200401	Illumina NovaSeq 6000	AMPLICON	PCR
ERX4363842	ERR4423284	3	20200401	Illumina NovaSeq 6000	AMPLICON	PCR
ERX4363850	ERR4423292	3	20200401	Illumina NovaSeq 6000	AMPLICON	PCR
ERX4363894	ERR4423336	3	20200401	Illumina NovaSeq 6000	AMPLICON	PCR
ERX4365080	ERR4424522	3	20200401	Illumina NovaSeq 6000	AMPLICON	PCR
ERX4365102	ERR4424544	3	20200401	Illumina NovaSeq 6000	AMPLICON	PCR
ERX4365108	ERR4424550	3	20200401	Illumina NovaSeq 6000	AMPLICON	PCR
ERX4365438	ERR4424880	3	20200401	Illumina NovaSeq 6000	AMPLICON	PCR
ERX4365531	ERR4424973	3	20200401	Illumina NovaSeq 6000	AMPLICON	PCR
ERX4365541	ERR4424983	3	20200401	Illumina NovaSeq 6000	AMPLICON	PCR
ERX4365591	ERR4425033	3	20200401	Illumina NovaSeq 6000	AMPLICON	PCR
ERX4378709	ERR4438206	3	20200401	Illumina NovaSeq 6000	AMPLICON	PCR
ERX4398532	ERR4458161	3	20200401	Illumina NovaSeq 6000	AMPLICON	PCR
ERX4398545	ERR4458174	3	20200401	Illumina NovaSeq 6000	AMPLICON	PCR
ERX4399399	ERR4459028	3	20200401	Illumina NovaSeq 6000	AMPLICON	PCR
ERX4399474	ERR4459103	3	20200401	Illumina NovaSeq 6000	AMPLICON	PCR
ERX4399478	ERR4459107	3	20200401	Illumina NovaSeq 6000	AMPLICON	PCR
ERX4399488	ERR4459117	3	20200401	Illumina NovaSeq 6000	AMPLICON	PCR
ERX4399811	ERR4459440	3	20200401	Illumina NovaSeq 6000	AMPLICON	PCR
ERX4399843	ERR4459472	3	20200401	Illumina NovaSeq 6000	AMPLICON	PCR
ERX4399930	ERR4459559	3	20200401	Illumina NovaSeq 6000	AMPLICON	PCR
ERX4399953	ERR4459582	3	20200401	Illumina NovaSeq 6000	AMPLICON	PCR
ERX4399982	ERR4459611	3	20200401	Illumina NovaSeq 6000	AMPLICON	PCR
ERX4399987	ERR4459616	3	20200401	Illumina NovaSeq 6000	AMPLICON	PCR
ERX4400006	ERR4459635	3	20200401	Illumina NovaSeq 6000	AMPLICON	PCR
ERX4400016	ERR4459645	3	20200401	Illumina NovaSeq 6000	AMPLICON	PCR
ERX4400037	ERR4459666	3	20200401	Illumina NovaSeq 6000	AMPLICON	PCR
ERX4400051	ERR4459680	3	20200401	Illumina NovaSeq 6000	AMPLICON	PCR
ERX4400074	ERR4459703	3	20200401	Illumina NovaSeq 6000	AMPLICON	PCR
ERX4400078	ERR4459707	3	20200401	Illumina NovaSeq 6000	AMPLICON	PCR
ERX4400091	ERR4459720	3	20200401	Illumina NovaSeq 6000	AMPLICON	PCR
ERX4400108	ERR4459737	3	20200401	Illumina NovaSeq 6000	AMPLICON	PCR
ERX4400138	ERR4459767	3	20200401	Illumina NovaSeq 6000	AMPLICON	PCR
ERX4400145	ERR4459774	3	20200401	Illumina NovaSeq 6000	AMPLICON	PCR
ERX4400151	ERR4459780	3	20200401	Illumina NovaSeq 6000	AMPLICON	PCR
ERX4400176	ERR4459805	3	20200401	Illumina NovaSeq 6000	AMPLICON	PCR
ERX4400183	ERR4459812	3	20200401	Illumina NovaSeq 6000	AMPLICON	PCR
ERX4400233	ERR4459862	3	20200401	Illumina NovaSeq 6000	AMPLICON	PCR
ERX4400283	ERR4459912	3	20200401	Illumina NovaSeq 6000	AMPLICON	PCR
ERX4400301	ERR4459930	3	20200401	Illumina NovaSeq 6000	AMPLICON	PCR
ERX4400398	ERR4460027	3	20200401	Illumina NovaSeq 6000	AMPLICON	PCR
ERX4402889	ERR4462518	3	20200401	Illumina NovaSeq 6000	AMPLICON	PCR
ERX4402898	ERR4462527	3	20200401	Illumina NovaSeq 6000	AMPLICON	PCR
ERX4402926	ERR4462555	3	20200401	Illumina NovaSeq 6000	AMPLICON	PCR
ERX4402939	ERR4462568	3	20200401	Illumina NovaSeq 6000	AMPLICON	PCR
ERX4402975	ERR4462604	3	20200401	Illumina NovaSeq 6000	AMPLICON	PCR
ERX4402985	ERR4462614	3	20200401	Illumina NovaSeq 6000	AMPLICON	PCR
ERX4402995	ERR4462624	3	20200401	Illumina NovaSeq 6000	AMPLICON	PCR
ERX4402997	ERR4462626	3	20200401	Illumina NovaSeq 6000	AMPLICON	PCR
ERX4535922	ERR4603775	3	20200401	Illumina NovaSeq 6000	AMPLICON	PCR
ERX4535997	ERR4603850	3	20200401	Illumina NovaSeq 6000	AMPLICON	PCR
ERX4536061	ERR4603914	3	20200401	Illumina NovaSeq 6000	AMPLICON	PCR
ERX4536062	ERR4603915	3	20200401	Illumina NovaSeq 6000	AMPLICON	PCR
ERX4536092	ERR4603945	3	20200401	Illumina NovaSeq 6000	AMPLICON	PCR
ERX4536130	ERR4603983	3	20200401	Illumina NovaSeq 6000	AMPLICON	PCR
ERX4536223	ERR4604076	3	20200401	Illumina NovaSeq 6000	AMPLICON	PCR
ERX4360856	ERR4413720	3	20200401	Illumina NovaSeq 6000	AMPLICON	PCR
ERX4536096	ERR4603949	3	20200401	Illumina NovaSeq 6000	AMPLICON	PCR
ERX4400007	ERR4459636	3	20200401	Illumina NovaSeq 6000	AMPLICON	PCR
ERX4536079	ERR4603932	3	20200401	Illumina NovaSeq 6000	AMPLICON	PCR
ERX4276257	ERR4329423	3	20200401	Illumina NovaSeq 6000	AMPLICON	PCR
ERX4399483	ERR4459112	3	20200401	Illumina NovaSeq 6000	AMPLICON	PCR
ERX4378723	ERR4438220	3	20200401	Illumina NovaSeq 6000	AMPLICON	PCR
ERX4399880	ERR4459509	3	20200401	Illumina NovaSeq 6000	AMPLICON	PCR
ERX4399491	ERR4459120	3	20200401	Illumina NovaSeq 6000	AMPLICON	PCR
ERX4276095	ERR4329261	3	20200402	Illumina NovaSeq 6000	AMPLICON	PCR
ERX4276098	ERR4329264	3	20200402	Illumina NovaSeq 6000	AMPLICON	PCR
ERX4276154	ERR4329320	3	20200402	Illumina NovaSeq 6000	AMPLICON	PCR
ERX4276170	ERR4329336	3	20200402	Illumina NovaSeq 6000	AMPLICON	PCR
ERX4276221	ERR4329387	3	20200402	Illumina NovaSeq 6000	AMPLICON	PCR
ERX4360739	ERR4413603	3	20200402	Illumina NovaSeq 6000	AMPLICON	PCR
ERX4363788	ERR4423230	3	20200402	Illumina NovaSeq 6000	AMPLICON	PCR
ERX4363855	ERR4423297	3	20200402	Illumina NovaSeq 6000	AMPLICON	PCR
ERX4363903	ERR4423345	3	20200402	Illumina NovaSeq 6000	AMPLICON	PCR
ERX4365132	ERR4424574	3	20200402	Illumina NovaSeq 6000	AMPLICON	PCR
ERX4365365	ERR4424807	3	20200402	Illumina NovaSeq 6000	AMPLICON	PCR
ERX4365432	ERR4424874	3	20200402	Illumina NovaSeq 6000	AMPLICON	PCR
ERX4365451	ERR4424893	3	20200402	Illumina NovaSeq 6000	AMPLICON	PCR
ERX4365596	ERR4425038	3	20200402	Illumina NovaSeq 6000	AMPLICON	PCR
ERX4365597	ERR4425039	3	20200402	Illumina NovaSeq 6000	AMPLICON	PCR
ERX4365784	ERR4425226	3	20200402	Illumina NovaSeq 6000	AMPLICON	PCR
ERX4378688	ERR4438185	3	20200402	Illumina NovaSeq 6000	AMPLICON	PCR
ERX4378802	ERR4438299	3	20200402	Illumina NovaSeq 6000	AMPLICON	PCR
ERX4378825	ERR4438322	3	20200402	Illumina NovaSeq 6000	AMPLICON	PCR
ERX4399455	ERR4459084	3	20200402	Illumina NovaSeq 6000	AMPLICON	PCR
ERX4399765	ERR4459394	3	20200402	Illumina NovaSeq 6000	AMPLICON	PCR
ERX4399779	ERR4459408	3	20200402	Illumina NovaSeq 6000	AMPLICON	PCR
ERX4399788	ERR4459417	3	20200402	Illumina NovaSeq 6000	AMPLICON	PCR
ERX4399808	ERR4459437	3	20200402	Illumina NovaSeq 6000	AMPLICON	PCR
ERX4399817	ERR4459446	3	20200402	Illumina NovaSeq 6000	AMPLICON	PCR
ERX4399842	ERR4459471	3	20200402	Illumina NovaSeq 6000	AMPLICON	PCR
ERX4399845	ERR4459474	3	20200402	Illumina NovaSeq 6000	AMPLICON	PCR
ERX4399859	ERR4459488	3	20200402	Illumina NovaSeq 6000	AMPLICON	PCR
ERX4399877	ERR4459506	3	20200402	Illumina NovaSeq 6000	AMPLICON	PCR
ERX4399911	ERR4459540	3	20200402	Illumina NovaSeq 6000	AMPLICON	PCR
ERX4399929	ERR4459558	3	20200402	Illumina NovaSeq 6000	AMPLICON	PCR
ERX4400001	ERR4459630	3	20200402	Illumina NovaSeq 6000	AMPLICON	PCR
ERX4400004	ERR4459633	3	20200402	Illumina NovaSeq 6000	AMPLICON	PCR
ERX4400010	ERR4459639	3	20200402	Illumina NovaSeq 6000	AMPLICON	PCR
ERX4400042	ERR4459671	3	20200402	Illumina NovaSeq 6000	AMPLICON	PCR
ERX4400066	ERR4459695	3	20200402	Illumina NovaSeq 6000	AMPLICON	PCR
ERX4400067	ERR4459696	3	20200402	Illumina NovaSeq 6000	AMPLICON	PCR
ERX4400071	ERR4459700	3	20200402	Illumina NovaSeq 6000	AMPLICON	PCR
ERX4400080	ERR4459709	3	20200402	Illumina NovaSeq 6000	AMPLICON	PCR
ERX4400086	ERR4459715	3	20200402	Illumina NovaSeq 6000	AMPLICON	PCR
ERX4400099	ERR4459728	3	20200402	Illumina NovaSeq 6000	AMPLICON	PCR
ERX4400105	ERR4459734	3	20200402	Illumina NovaSeq 6000	AMPLICON	PCR
ERX4400110	ERR4459739	3	20200402	Illumina NovaSeq 6000	AMPLICON	PCR
ERX4400114	ERR4459743	3	20200402	Illumina NovaSeq 6000	AMPLICON	PCR
ERX4400144	ERR4459773	3	20200402	Illumina NovaSeq 6000	AMPLICON	PCR
ERX4400189	ERR4459818	3	20200402	Illumina NovaSeq 6000	AMPLICON	PCR
ERX4400210	ERR4459839	3	20200402	Illumina NovaSeq 6000	AMPLICON	PCR
ERX4400227	ERR4459856	3	20200402	Illumina NovaSeq 6000	AMPLICON	PCR
ERX4400229	ERR4459858	3	20200402	Illumina NovaSeq 6000	AMPLICON	PCR
ERX4400235	ERR4459864	3	20200402	Illumina NovaSeq 6000	AMPLICON	PCR
ERX4400246	ERR4459875	3	20200402	Illumina NovaSeq 6000	AMPLICON	PCR
ERX4400248	ERR4459877	3	20200402	Illumina NovaSeq 6000	AMPLICON	PCR
ERX4400252	ERR4459881	3	20200402	Illumina NovaSeq 6000	AMPLICON	PCR
ERX4400258	ERR4459887	3	20200402	Illumina NovaSeq 6000	AMPLICON	PCR
ERX4400259	ERR4459888	3	20200402	Illumina NovaSeq 6000	AMPLICON	PCR
ERX4400267	ERR4459896	3	20200402	Illumina NovaSeq 6000	AMPLICON	PCR
ERX4400273	ERR4459902	3	20200402	Illumina NovaSeq 6000	AMPLICON	PCR
ERX4400288	ERR4459917	3	20200402	Illumina NovaSeq 6000	AMPLICON	PCR
ERX4400289	ERR4459918	3	20200402	Illumina NovaSeq 6000	AMPLICON	PCR
ERX4400291	ERR4459920	3	20200402	Illumina NovaSeq 6000	AMPLICON	PCR
ERX4400296	ERR4459925	3	20200402	Illumina NovaSeq 6000	AMPLICON	PCR
ERX4400299	ERR4459928	3	20200402	Illumina NovaSeq 6000	AMPLICON	PCR
ERX4400312	ERR4459941	3	20200402	Illumina NovaSeq 6000	AMPLICON	PCR
ERX4400318	ERR4459947	3	20200402	Illumina NovaSeq 6000	AMPLICON	PCR
ERX4400320	ERR4459949	3	20200402	Illumina NovaSeq 6000	AMPLICON	PCR
ERX4400326	ERR4459955	3	20200402	Illumina NovaSeq 6000	AMPLICON	PCR
ERX4400335	ERR4459964	3	20200402	Illumina NovaSeq 6000	AMPLICON	PCR
ERX4400341	ERR4459970	3	20200402	Illumina NovaSeq 6000	AMPLICON	PCR
ERX4400358	ERR4459987	3	20200402	Illumina NovaSeq 6000	AMPLICON	PCR
ERX4400359	ERR4459988	3	20200402	Illumina NovaSeq 6000	AMPLICON	PCR
ERX4400361	ERR4459990	3	20200402	Illumina NovaSeq 6000	AMPLICON	PCR
ERX4400367	ERR4459996	3	20200402	Illumina NovaSeq 6000	AMPLICON	PCR
ERX4400370	ERR4459999	3	20200402	Illumina NovaSeq 6000	AMPLICON	PCR
ERX4400371	ERR4460000	3	20200402	Illumina NovaSeq 6000	AMPLICON	PCR
ERX4400373	ERR4460002	3	20200402	Illumina NovaSeq 6000	AMPLICON	PCR
ERX4400377	ERR4460006	3	20200402	Illumina NovaSeq 6000	AMPLICON	PCR
ERX4400384	ERR4460013	3	20200402	Illumina NovaSeq 6000	AMPLICON	PCR
ERX4400388	ERR4460017	3	20200402	Illumina NovaSeq 6000	AMPLICON	PCR
ERX4400393	ERR4460022	3	20200402	Illumina NovaSeq 6000	AMPLICON	PCR
ERX4400396	ERR4460025	3	20200402	Illumina NovaSeq 6000	AMPLICON	PCR
ERX4402955	ERR4462584	3	20200402	Illumina NovaSeq 6000	AMPLICON	PCR
ERX4516659	ERR4581119	3	20200402	Illumina NovaSeq 6000	AMPLICON	PCR
ERX4516672	ERR4581132	3	20200402	Illumina NovaSeq 6000	AMPLICON	PCR
ERX4516704	ERR4581164	3	20200402	Illumina NovaSeq 6000	AMPLICON	PCR
ERX4516707	ERR4581167	3	20200402	Illumina NovaSeq 6000	AMPLICON	PCR
ERX4535980	ERR4603833	3	20200402	Illumina NovaSeq 6000	AMPLICON	PCR
ERX4536128	ERR4603981	3	20200402	Illumina NovaSeq 6000	AMPLICON	PCR
ERX4399849	ERR4459478	3	20200402	Illumina NovaSeq 6000	AMPLICON	PCR
ERX4399873	ERR4459502	3	20200402	Illumina NovaSeq 6000	AMPLICON	PCR
ERX4399951	ERR4459580	3	20200402	Illumina NovaSeq 6000	AMPLICON	PCR
ERX4400354	ERR4459983	3	20200402	Illumina NovaSeq 6000	AMPLICON	PCR
ERX4276148	ERR4329314	3	20200402	Illumina NovaSeq 6000	AMPLICON	PCR
ERX4400454	ERR4460083	3	20200402	Illumina NovaSeq 6000	AMPLICON	PCR
ERX4365267	ERR4424709	3	20200402	Illumina NovaSeq 6000	AMPLICON	PCR
ERX4400276	ERR4459905	3	20200402	Illumina NovaSeq 6000	AMPLICON	PCR
ERX4400746	ERR4460375	3	20200402	Illumina NovaSeq 6000	AMPLICON	PCR
ERX4400214	ERR4459843	3	20200402	Illumina NovaSeq 6000	AMPLICON	PCR
ERX4400106	ERR4459735	3	20200402	Illumina NovaSeq 6000	AMPLICON	PCR
ERX4363658	ERR4423100	3	20200403	Illumina NovaSeq 6000	AMPLICON	PCR
ERX4363660	ERR4423102	3	20200403	Illumina NovaSeq 6000	AMPLICON	PCR
ERX4363728	ERR4423170	3	20200403	Illumina NovaSeq 6000	AMPLICON	PCR
ERX4363808	ERR4423250	3	20200403	Illumina NovaSeq 6000	AMPLICON	PCR
ERX4363868	ERR4423310	3	20200403	Illumina NovaSeq 6000	AMPLICON	PCR
ERX4363900	ERR4423342	3	20200403	Illumina NovaSeq 6000	AMPLICON	PCR
ERX4364362	ERR4423804	3	20200403	Illumina NovaSeq 6000	AMPLICON	PCR
ERX4364463	ERR4423905	3	20200403	Illumina NovaSeq 6000	AMPLICON	PCR
ERX4364578	ERR4424020	3	20200403	Illumina NovaSeq 6000	AMPLICON	PCR
ERX4364580	ERR4424022	3	20200403	Illumina NovaSeq 6000	AMPLICON	PCR
ERX4364612	ERR4424054	3	20200403	Illumina NovaSeq 6000	AMPLICON	PCR
ERX4365145	ERR4424587	3	20200403	Illumina NovaSeq 6000	AMPLICON	PCR
ERX4378687	ERR4438184	3	20200403	Illumina NovaSeq 6000	AMPLICON	PCR
ERX4378726	ERR4438223	3	20200403	Illumina NovaSeq 6000	AMPLICON	PCR
ERX4378758	ERR4438255	3	20200403	Illumina NovaSeq 6000	AMPLICON	PCR
ERX4378771	ERR4438268	3	20200403	Illumina NovaSeq 6000	AMPLICON	PCR
ERX4378783	ERR4438280	3	20200403	Illumina NovaSeq 6000	AMPLICON	PCR
ERX4378784	ERR4438281	3	20200403	Illumina NovaSeq 6000	AMPLICON	PCR
ERX4378831	ERR4438328	3	20200403	Illumina NovaSeq 6000	AMPLICON	PCR
ERX4398442	ERR4458071	3	20200403	Illumina NovaSeq 6000	AMPLICON	PCR
ERX4399472	ERR4459101	3	20200403	Illumina NovaSeq 6000	AMPLICON	PCR
ERX4399770	ERR4459399	3	20200403	Illumina NovaSeq 6000	AMPLICON	PCR
ERX4399775	ERR4459404	3	20200403	Illumina NovaSeq 6000	AMPLICON	PCR
ERX4399777	ERR4459406	3	20200403	Illumina NovaSeq 6000	AMPLICON	PCR
ERX4399800	ERR4459429	3	20200403	Illumina NovaSeq 6000	AMPLICON	PCR
ERX4399844	ERR4459473	3	20200403	Illumina NovaSeq 6000	AMPLICON	PCR
ERX4399875	ERR4459504	3	20200403	Illumina NovaSeq 6000	AMPLICON	PCR
ERX4399885	ERR4459514	3	20200403	Illumina NovaSeq 6000	AMPLICON	PCR
ERX4399889	ERR4459518	3	20200403	Illumina NovaSeq 6000	AMPLICON	PCR
ERX4399899	ERR4459528	3	20200403	Illumina NovaSeq 6000	AMPLICON	PCR
ERX4399907	ERR4459536	3	20200403	Illumina NovaSeq 6000	AMPLICON	PCR
ERX4399914	ERR4459543	3	20200403	Illumina NovaSeq 6000	AMPLICON	PCR
ERX4399915	ERR4459544	3	20200403	Illumina NovaSeq 6000	AMPLICON	PCR
ERX4399927	ERR4459556	3	20200403	Illumina NovaSeq 6000	AMPLICON	PCR
ERX4399947	ERR4459576	3	20200403	Illumina NovaSeq 6000	AMPLICON	PCR
ERX4399962	ERR4459591	3	20200403	Illumina NovaSeq 6000	AMPLICON	PCR
ERX4399988	ERR4459617	3	20200403	Illumina NovaSeq 6000	AMPLICON	PCR
ERX4399991	ERR4459620	3	20200403	Illumina NovaSeq 6000	AMPLICON	PCR
ERX4399994	ERR4459623	3	20200403	Illumina NovaSeq 6000	AMPLICON	PCR
ERX4399997	ERR4459626	3	20200403	Illumina NovaSeq 6000	AMPLICON	PCR
ERX4400003	ERR4459632	3	20200403	Illumina NovaSeq 6000	AMPLICON	PCR
ERX4400011	ERR4459640	3	20200403	Illumina NovaSeq 6000	AMPLICON	PCR
ERX4400026	ERR4459655	3	20200403	Illumina NovaSeq 6000	AMPLICON	PCR
ERX4400032	ERR4459661	3	20200403	Illumina NovaSeq 6000	AMPLICON	PCR
ERX4400044	ERR4459673	3	20200403	Illumina NovaSeq 6000	AMPLICON	PCR
ERX4400048	ERR4459677	3	20200403	Illumina NovaSeq 6000	AMPLICON	PCR
ERX4400052	ERR4459681	3	20200403	Illumina NovaSeq 6000	AMPLICON	PCR
ERX4400053	ERR4459682	3	20200403	Illumina NovaSeq 6000	AMPLICON	PCR
ERX4400057	ERR4459686	3	20200403	Illumina NovaSeq 6000	AMPLICON	PCR
ERX4400068	ERR4459697	3	20200403	Illumina NovaSeq 6000	AMPLICON	PCR
ERX4400069	ERR4459698	3	20200403	Illumina NovaSeq 6000	AMPLICON	PCR
ERX4400075	ERR4459704	3	20200403	Illumina NovaSeq 6000	AMPLICON	PCR
ERX4400084	ERR4459713	3	20200403	Illumina NovaSeq 6000	AMPLICON	PCR
ERX4400101	ERR4459730	3	20200403	Illumina NovaSeq 6000	AMPLICON	PCR
ERX4400102	ERR4459731	3	20200403	Illumina NovaSeq 6000	AMPLICON	PCR
ERX4400118	ERR4459747	3	20200403	Illumina NovaSeq 6000	AMPLICON	PCR
ERX4400122	ERR4459751	3	20200403	Illumina NovaSeq 6000	AMPLICON	PCR
ERX4400128	ERR4459757	3	20200403	Illumina NovaSeq 6000	AMPLICON	PCR
ERX4400142	ERR4459771	3	20200403	Illumina NovaSeq 6000	AMPLICON	PCR
ERX4400147	ERR4459776	3	20200403	Illumina NovaSeq 6000	AMPLICON	PCR
ERX4400161	ERR4459790	3	20200403	Illumina NovaSeq 6000	AMPLICON	PCR
ERX4400164	ERR4459793	3	20200403	Illumina NovaSeq 6000	AMPLICON	PCR
ERX4400171	ERR4459800	3	20200403	Illumina NovaSeq 6000	AMPLICON	PCR
ERX4400172	ERR4459801	3	20200403	Illumina NovaSeq 6000	AMPLICON	PCR
ERX4400175	ERR4459804	3	20200403	Illumina NovaSeq 6000	AMPLICON	PCR
ERX4400177	ERR4459806	3	20200403	Illumina NovaSeq 6000	AMPLICON	PCR
ERX4400182	ERR4459811	3	20200403	Illumina NovaSeq 6000	AMPLICON	PCR
ERX4400186	ERR4459815	3	20200403	Illumina NovaSeq 6000	AMPLICON	PCR
ERX4400247	ERR4459876	3	20200403	Illumina NovaSeq 6000	AMPLICON	PCR
ERX4400362	ERR4459991	3	20200403	Illumina NovaSeq 6000	AMPLICON	PCR
ERX4400372	ERR4460001	3	20200403	Illumina NovaSeq 6000	AMPLICON	PCR
ERX4400385	ERR4460014	3	20200403	Illumina NovaSeq 6000	AMPLICON	PCR
ERX4400387	ERR4460016	3	20200403	Illumina NovaSeq 6000	AMPLICON	PCR
ERX4400389	ERR4460018	3	20200403	Illumina NovaSeq 6000	AMPLICON	PCR
ERX4400713	ERR4460342	3	20200403	Illumina NovaSeq 6000	AMPLICON	PCR
ERX4400773	ERR4460402	3	20200403	Illumina NovaSeq 6000	AMPLICON	PCR
ERX4400788	ERR4460417	3	20200403	Illumina NovaSeq 6000	AMPLICON	PCR
ERX4400906	ERR4460535	3	20200403	Illumina NovaSeq 6000	AMPLICON	PCR
ERX4400938	ERR4460567	3	20200403	Illumina NovaSeq 6000	AMPLICON	PCR
ERX4400969	ERR4460598	3	20200403	Illumina NovaSeq 6000	AMPLICON	PCR
ERX4401113	ERR4460742	3	20200403	Illumina NovaSeq 6000	AMPLICON	PCR
ERX4401121	ERR4460750	3	20200403	Illumina NovaSeq 6000	AMPLICON	PCR
ERX4516667	ERR4581127	3	20200403	Illumina NovaSeq 6000	AMPLICON	PCR
ERX4516673	ERR4581133	3	20200403	Illumina NovaSeq 6000	AMPLICON	PCR
ERX4516708	ERR4581168	3	20200403	Illumina NovaSeq 6000	AMPLICON	PCR
ERX4516709	ERR4581169	3	20200403	Illumina NovaSeq 6000	AMPLICON	PCR
ERX4535966	ERR4603819	3	20200403	Illumina NovaSeq 6000	AMPLICON	PCR
ERX4535989	ERR4603842	3	20200403	Illumina NovaSeq 6000	AMPLICON	PCR
ERX4536053	ERR4603906	3	20200403	Illumina NovaSeq 6000	AMPLICON	PCR
ERX4536078	ERR4603931	3	20200403	Illumina NovaSeq 6000	AMPLICON	PCR
ERX4517085	ERR4581545	3	20200403	Illumina NovaSeq 6000	AMPLICON	PCR
ERX4400076	ERR4459705	3	20200403	Illumina NovaSeq 6000	AMPLICON	PCR
ERX4400374	ERR4460003	3	20200403	Illumina NovaSeq 6000	AMPLICON	PCR
ERX4399854	ERR4459483	3	20200403	Illumina NovaSeq 6000	AMPLICON	PCR
ERX4378772	ERR4438269	3	20200403	Illumina NovaSeq 6000	AMPLICON	PCR
ERX4363787	ERR4423229	3	20200403	Illumina NovaSeq 6000	AMPLICON	PCR
ERX4516702	ERR4581162	3	20200403	Illumina NovaSeq 6000	AMPLICON	PCR
ERX4378707	ERR4438204	3	20200403	Illumina NovaSeq 6000	AMPLICON	PCR
ERX4364534	ERR4423976	3	20200403	Illumina NovaSeq 6000	AMPLICON	PCR
ERX4400265	ERR4459894	3	20200403	Illumina NovaSeq 6000	AMPLICON	PCR
ERX4363688	ERR4423130	3	20200404	Illumina NovaSeq 6000	AMPLICON	PCR
ERX4363770	ERR4423212	3	20200404	Illumina NovaSeq 6000	AMPLICON	PCR
ERX4363799	ERR4423241	3	20200404	Illumina NovaSeq 6000	AMPLICON	PCR
ERX4363806	ERR4423248	3	20200404	Illumina NovaSeq 6000	AMPLICON	PCR
ERX4363848	ERR4423290	3	20200404	Illumina NovaSeq 6000	AMPLICON	PCR
ERX4363967	ERR4423409	3	20200404	Illumina NovaSeq 6000	AMPLICON	PCR
ERX4363995	ERR4423437	3	20200404	Illumina NovaSeq 6000	AMPLICON	PCR
ERX4364742	ERR4424184	3	20200404	Illumina NovaSeq 6000	AMPLICON	PCR
ERX4364751	ERR4424193	3	20200404	Illumina NovaSeq 6000	AMPLICON	PCR
ERX4365144	ERR4424586	3	20200404	Illumina NovaSeq 6000	AMPLICON	PCR
ERX4365258	ERR4424700	3	20200404	Illumina NovaSeq 6000	AMPLICON	PCR
ERX4365272	ERR4424714	3	20200404	Illumina NovaSeq 6000	AMPLICON	PCR
ERX4377388	ERR4436885	3	20200404	Illumina NovaSeq 6000	AMPLICON	PCR
ERX4378690	ERR4438187	3	20200404	Illumina NovaSeq 6000	AMPLICON	PCR
ERX4378704	ERR4438201	3	20200404	Illumina NovaSeq 6000	AMPLICON	PCR
ERX4378732	ERR4438229	3	20200404	Illumina NovaSeq 6000	AMPLICON	PCR
ERX4378800	ERR4438297	3	20200404	Illumina NovaSeq 6000	AMPLICON	PCR
ERX4378808	ERR4438305	3	20200404	Illumina NovaSeq 6000	AMPLICON	PCR
ERX4399774	ERR4459403	3	20200404	Illumina NovaSeq 6000	AMPLICON	PCR
ERX4399776	ERR4459405	3	20200404	Illumina NovaSeq 6000	AMPLICON	PCR
ERX4399793	ERR4459422	3	20200404	Illumina NovaSeq 6000	AMPLICON	PCR
ERX4399801	ERR4459430	3	20200404	Illumina NovaSeq 6000	AMPLICON	PCR
ERX4399803	ERR4459432	3	20200404	Illumina NovaSeq 6000	AMPLICON	PCR
ERX4399813	ERR4459442	3	20200404	Illumina NovaSeq 6000	AMPLICON	PCR
ERX4399819	ERR4459448	3	20200404	Illumina NovaSeq 6000	AMPLICON	PCR
ERX4399840	ERR4459469	3	20200404	Illumina NovaSeq 6000	AMPLICON	PCR
ERX4399871	ERR4459500	3	20200404	Illumina NovaSeq 6000	AMPLICON	PCR
ERX4399901	ERR4459530	3	20200404	Illumina NovaSeq 6000	AMPLICON	PCR
ERX4399905	ERR4459534	3	20200404	Illumina NovaSeq 6000	AMPLICON	PCR
ERX4399921	ERR4459550	3	20200404	Illumina NovaSeq 6000	AMPLICON	PCR
ERX4399932	ERR4459561	3	20200404	Illumina NovaSeq 6000	AMPLICON	PCR
ERX4399934	ERR4459563	3	20200404	Illumina NovaSeq 6000	AMPLICON	PCR
ERX4399935	ERR4459564	3	20200404	Illumina NovaSeq 6000	AMPLICON	PCR
ERX4399939	ERR4459568	3	20200404	Illumina NovaSeq 6000	AMPLICON	PCR
ERX4400058	ERR4459687	3	20200404	Illumina NovaSeq 6000	AMPLICON	PCR
ERX4400179	ERR4459808	3	20200404	Illumina NovaSeq 6000	AMPLICON	PCR
ERX4400187	ERR4459816	3	20200404	Illumina NovaSeq 6000	AMPLICON	PCR
ERX4400266	ERR4459895	3	20200404	Illumina NovaSeq 6000	AMPLICON	PCR
ERX4400541	ERR4460170	3	20200404	Illumina NovaSeq 6000	AMPLICON	PCR
ERX4400547	ERR4460176	3	20200404	Illumina NovaSeq 6000	AMPLICON	PCR
ERX4400562	ERR4460191	3	20200404	Illumina NovaSeq 6000	AMPLICON	PCR
ERX4400564	ERR4460193	3	20200404	Illumina NovaSeq 6000	AMPLICON	PCR
ERX4400594	ERR4460223	3	20200404	Illumina NovaSeq 6000	AMPLICON	PCR
ERX4400658	ERR4460287	3	20200404	Illumina NovaSeq 6000	AMPLICON	PCR
ERX4400662	ERR4460291	3	20200404	Illumina NovaSeq 6000	AMPLICON	PCR
ERX4400682	ERR4460311	3	20200404	Illumina NovaSeq 6000	AMPLICON	PCR
ERX4400689	ERR4460318	3	20200404	Illumina NovaSeq 6000	AMPLICON	PCR
ERX4400694	ERR4460323	3	20200404	Illumina NovaSeq 6000	AMPLICON	PCR
ERX4400695	ERR4460324	3	20200404	Illumina NovaSeq 6000	AMPLICON	PCR
ERX4400700	ERR4460329	3	20200404	Illumina NovaSeq 6000	AMPLICON	PCR
ERX4400710	ERR4460339	3	20200404	Illumina NovaSeq 6000	AMPLICON	PCR
ERX4400717	ERR4460346	3	20200404	Illumina NovaSeq 6000	AMPLICON	PCR
ERX4400739	ERR4460368	3	20200404	Illumina NovaSeq 6000	AMPLICON	PCR
ERX4400783	ERR4460412	3	20200404	Illumina NovaSeq 6000	AMPLICON	PCR
ERX4400787	ERR4460416	3	20200404	Illumina NovaSeq 6000	AMPLICON	PCR
ERX4400791	ERR4460420	3	20200404	Illumina NovaSeq 6000	AMPLICON	PCR
ERX4400792	ERR4460421	3	20200404	Illumina NovaSeq 6000	AMPLICON	PCR
ERX4400809	ERR4460438	3	20200404	Illumina NovaSeq 6000	AMPLICON	PCR
ERX4400843	ERR4460472	3	20200404	Illumina NovaSeq 6000	AMPLICON	PCR
ERX4400860	ERR4460489	3	20200404	Illumina NovaSeq 6000	AMPLICON	PCR
ERX4400877	ERR4460506	3	20200404	Illumina NovaSeq 6000	AMPLICON	PCR
ERX4400879	ERR4460508	3	20200404	Illumina NovaSeq 6000	AMPLICON	PCR
ERX4400891	ERR4460520	3	20200404	Illumina NovaSeq 6000	AMPLICON	PCR
ERX4400903	ERR4460532	3	20200404	Illumina NovaSeq 6000	AMPLICON	PCR
ERX4400923	ERR4460552	3	20200404	Illumina NovaSeq 6000	AMPLICON	PCR
ERX4400935	ERR4460564	3	20200404	Illumina NovaSeq 6000	AMPLICON	PCR
ERX4400985	ERR4460614	3	20200404	Illumina NovaSeq 6000	AMPLICON	PCR
ERX4401088	ERR4460717	3	20200404	Illumina NovaSeq 6000	AMPLICON	PCR
ERX4401154	ERR4460783	3	20200404	Illumina NovaSeq 6000	AMPLICON	PCR
ERX4401300	ERR4460929	3	20200404	Illumina NovaSeq 6000	AMPLICON	PCR
ERX4402718	ERR4462347	3	20200404	Illumina NovaSeq 6000	AMPLICON	PCR
ERX4516542	ERR4581003	3	20200404	Illumina NovaSeq 6000	AMPLICON	PCR
ERX4516544	ERR4581005	3	20200404	Illumina NovaSeq 6000	AMPLICON	PCR
ERX4516553	ERR4581014	3	20200404	Illumina NovaSeq 6000	AMPLICON	PCR
ERX4516559	ERR4581020	3	20200404	Illumina NovaSeq 6000	AMPLICON	PCR
ERX4516581	ERR4581042	3	20200404	Illumina NovaSeq 6000	AMPLICON	PCR
ERX4516656	ERR4581116	3	20200404	Illumina NovaSeq 6000	AMPLICON	PCR
ERX4516657	ERR4581117	3	20200404	Illumina NovaSeq 6000	AMPLICON	PCR
ERX4516675	ERR4581135	3	20200404	Illumina NovaSeq 6000	AMPLICON	PCR
ERX4517083	ERR4581543	3	20200404	Illumina NovaSeq 6000	AMPLICON	PCR
ERX4517107	ERR4581567	3	20200404	Illumina NovaSeq 6000	AMPLICON	PCR
ERX4535873	ERR4603726	3	20200404	Illumina NovaSeq 6000	AMPLICON	PCR
ERX4535974	ERR4603827	3	20200404	Illumina NovaSeq 6000	AMPLICON	PCR
ERX4535981	ERR4603834	3	20200404	Illumina NovaSeq 6000	AMPLICON	PCR
ERX4536029	ERR4603882	3	20200404	Illumina NovaSeq 6000	AMPLICON	PCR
ERX4536050	ERR4603903	3	20200404	Illumina NovaSeq 6000	AMPLICON	PCR
ERX4536064	ERR4603917	3	20200404	Illumina NovaSeq 6000	AMPLICON	PCR
ERX4536232	ERR4604085	3	20200404	Illumina NovaSeq 6000	AMPLICON	PCR
ERX4399500	ERR4459129	3	20200404	Illumina NovaSeq 6000	AMPLICON	PCR
ERX4400893	ERR4460522	3	20200404	Illumina NovaSeq 6000	AMPLICON	PCR
ERX4399855	ERR4459484	3	20200404	Illumina NovaSeq 6000	AMPLICON	PCR
ERX4363747	ERR4423189	3	20200404	Illumina NovaSeq 6000	AMPLICON	PCR
ERX4401105	ERR4460734	3	20200404	Illumina NovaSeq 6000	AMPLICON	PCR
ERX4400617	ERR4460246	3	20200404	Illumina NovaSeq 6000	AMPLICON	PCR
ERX4517071	ERR4581531	3	20200404	Illumina NovaSeq 6000	AMPLICON	PCR
ERX4535929	ERR4603782	3	20200404	Illumina NovaSeq 6000	AMPLICON	PCR
ERX4378691	ERR4438188	3	20200404	Illumina NovaSeq 6000	AMPLICON	PCR
ERX4400646	ERR4460275	3	20200404	Illumina NovaSeq 6000	AMPLICON	PCR
ERX4399794	ERR4459423	3	20200404	Illumina NovaSeq 6000	AMPLICON	PCR
ERX4363943	ERR4423385	3	20200405	Illumina NovaSeq 6000	AMPLICON	PCR
ERX4365284	ERR4424726	3	20200405	Illumina NovaSeq 6000	AMPLICON	PCR
ERX4377419	ERR4436916	3	20200405	Illumina NovaSeq 6000	AMPLICON	PCR
ERX4378786	ERR4438283	3	20200405	Illumina NovaSeq 6000	AMPLICON	PCR
ERX4378810	ERR4438307	3	20200405	Illumina NovaSeq 6000	AMPLICON	PCR
ERX4378832	ERR4438329	3	20200405	Illumina NovaSeq 6000	AMPLICON	PCR
ERX4398417	ERR4458046	3	20200405	Illumina NovaSeq 6000	AMPLICON	PCR
ERX4399795	ERR4459424	3	20200405	Illumina NovaSeq 6000	AMPLICON	PCR
ERX4399828	ERR4459457	3	20200405	Illumina NovaSeq 6000	AMPLICON	PCR
ERX4399830	ERR4459459	3	20200405	Illumina NovaSeq 6000	AMPLICON	PCR
ERX4399831	ERR4459460	3	20200405	Illumina NovaSeq 6000	AMPLICON	PCR
ERX4399856	ERR4459485	3	20200405	Illumina NovaSeq 6000	AMPLICON	PCR
ERX4399866	ERR4459495	3	20200405	Illumina NovaSeq 6000	AMPLICON	PCR
ERX4399884	ERR4459513	3	20200405	Illumina NovaSeq 6000	AMPLICON	PCR
[truncated: 94,210 more rows]

## Sheet: Supplementary Information 7
Amino acid position	Clusters in each model
	pam3	pam6	pam9	pam12	pam34
1	1	1	1	1	1
2	1	1	1	1	2
3	1	2	2	2	2
4	1	1	1	1	1
5	2	3	3	3	3
6	1	1	1	2	2
7	1	1	1	1	1
8	3	4	4	2	2
9	4	2	4	2	2
10	1	2	1	1	1
11	3	4	4	2	2
12	4	2	2	3	3
13	4	3	2	3	3
14	1	1	4	2	3
15	1	3	2	2	4
16	1	2	1	2	4
17	1	1	1	1	1
18	2	3	3	3	3
19	2	4	3	3	3
20	2	4	2	3	3
21	2	3	3	3	3
22	2	3	3	3	3
23	1	1	2	2	2
24	4	2	2	2	4
25	4	2	2	3	3
26	3	3	3	3	3
27	4	3	3	3	3
28	4	2	2	2	4
29	3	3	3	3	3
30	1	1	1	1	4
31	1	2	4	1	1
32	1	2	4	2	2
33	3	3	3	3	3
34	1	2	4	1	4
35	1	2	4	1	2
36	1	2	4	2	4
37	1	2	1	1	1
38	1	1	1	1	1
39	1	2	1	2	4
40	1	2	2	2	1
41	1	2	4	2	1
42	1	1	4	1	1
43	1	1	1	1	1
44	4	2	4	1	1
45	1	1	1	1	1
46	4	2	4	1	4
47	1	1	1	1	4
48	1	1	1	1	1
49	2	3	3	3	3
50	1	2	4	2	4
51	3	2	3	2	4
52	3	4	3	3	3
53	1	2	1	2	4
54	2	3	3	3	3
55	1	1	1	1	1
56	1	1	1	1	1
57	1	1	1	1	1
58	1	2	4	1	1
59	1	2	4	2	4
60	1	1	4	1	1
61	1	1	1	1	1
62	3	4	2	3	4
63	1	1	1	2	4
64	1	1	4	2	4
65	1	2	1	1	1
66	1	1	1	1	4
67	3	4	3	3	3
68	1	1	2	2	4
69	3	3	3	3	3
70	4	3	3	3	4
71	4	3	2	3	3
72	3	4	4	3	3
73	1	1	1	2	4
74	1	1	4	1	1
75	1	3	3	3	3
76	4	2	3	3	3
77	3	4	4	1	2
78	3	2	2	2	4
79	1	2	1	1	1
80	2	3	3	3	3
81	1	1	1	1	1
82	4	1	4	2	2
83	4	2	2	2	3
84	3	4	4	1	2
85	1	1	1	2	4
86	1	1	1	1	1
87	1	1	1	1	1
88	1	1	1	1	1
89	1	1	1	1	1
90	4	2	4	2	4
91	1	1	1	1	1
92	1	1	1	1	1
93	1	1	1	2	1
94	1	1	1	2	2
95	2	3	3	3	3
96	3	2	4	2	2
97	1	2	1	1	2
98	2	3	3	3	3
99	1	1	1	1	2
100	4	2	4	1	4
101	1	1	1	2	2
102	2	4	3	3	4
103	1	1	1	1	1
104	1	1	1	1	1
105	1	2	1	1	2
106	1	1	1	1	1
107	1	1	1	1	1
108	1	1	1	1	1
109	1	1	1	1	1
110	1	1	1	1	1
111	1	1	1	1	2
112	1	2	2	2	4
113	1	1	1	1	1
114	1	1	1	1	1
115	1	1	1	1	1
116	1	1	4	1	1
117	1	1	2	2	4
118	1	2	1	1	2
119	3	4	4	2	2
120	1	1	1	1	2
121	4	2	4	2	4
122	1	1	1	1	4
123	1	1	1	1	4
124	1	1	1	1	2
125	1	1	1	1	2
126	1	1	4	2	4
127	1	2	4	1	2
128	1	2	4	1	2
129	1	2	4	1	4
130	1	2	4	1	4
131	1	2	4	1	4
132	1	1	4	2	2
133	1	2	4	1	4
134	1	2	4	2	2
135	1	2	4	1	4
136	1	2	1	1	2
137	1	1	2	2	2
138	2	3	3	3	3
139	3	4	4	2	4
140	1	2	4	2	2
141	4	3	3	3	3
142	2	3	3	3	3
143	4	3	3	3	3
144	2	3	3	3	3
145	3	3	3	3	3
146	4	3	3	3	3
147	1	2	4	2	2
148	3	4	4	2	3
149	1	1	1	2	4
150	1	2	4	2	3
151	2	4	3	3	3
152	1	4	2	3	3
153	4	3	3	3	3
154	1	2	2	3	4
155	1	4	3	3	3
156	1	2	2	3	4
157	1	2	2	2	3
158	4	3	2	3	4
159	4	2	4	2	4
160	1	1	1	2	4
161	4	2	4	1	4
162	1	2	2	1	4
163	1	1	1	1	4
164	1	1	2	2	2
165	1	1	1	1	1
166	1	1	1	1	1
167	1	2	1	1	1
168	1	1	1	1	1
169	3	4	1	1	4
170	1	1	1	1	4
171	3	4	4	2	4
172	1	2	4	2	4
173	4	3	3	2	4
174	1	2	2	2	4
175	1	1	1	1	1
176	4	3	3	3	3
177	2	4	4	2	3
178	1	2	2	2	4
179	3	4	4	2	4
180	3	2	1	2	4
181	4	3	3	3	3
182	3	4	1	1	2
183	1	1	1	1	2
184	3	3	3	3	4
185	1	2	1	1	2
186	1	1	1	1	2
187	1	1	1	1	2
188	3	1	1	1	2
189	1	2	2	2	1
190	1	1	2	2	4
191	1	1	1	1	1
192	1	1	1	1	1
193	1	1	1	2	4
194	1	1	1	1	1
195	1	1	1	1	1
196	1	1	1	1	1
197	1	1	1	1	1
198	1	1	2	2	1
199	1	1	1	1	1
200	1	1	1	1	2
201	1	1	1	1	1
202	1	1	1	1	1
203	4	2	4	1	1
204	1	1	1	1	1
205	1	1	1	1	1
206	1	1	1	1	1
207	1	4	4	2	2
208	1	2	1	2	2
209	1	1	1	1	2
210	1	2	2	3	2
211	1	2	2	1	2
212	1	2	1	1	2
213	3	4	3	3	3
214	2	3	3	3	3
215	3	3	2	3	3
216	4	3	3	3	3
217	1	1	1	1	2
218	1	1	2	2	2
219	1	1	1	1	2
220	1	1	1	1	2
221	1	3	3	3	3
222	3	4	3	2	3
223	1	1	1	1	1
224	3	4	4	2	4
225	1	1	1	1	1
226	1	4	4	2	4
227	1	2	4	2	2
228	1	1	1	1	4
229	1	2	2	1	4
230	1	1	1	1	1
231	3	4	4	2	1
232	4	3	2	2	4
233	1	1	4	2	4
234	1	2	4	1	1
235	1	2	1	2	1
236	1	1	1	1	1
237	1	2	2	2	4
238	4	2	4	1	1
239	1	2	4	1	4
240	3	4	3	3	3
241	1	1	2	2	4
242	3	4	4	2	4
243	2	3	3	3	3
244	1	1	4	2	4
245	2	3	3	3	3
246	4	2	4	2	4
247	1	3	3	3	4
248	1	2	2	2	2
249	2	4	3	3	4
250	1	2	2	2	3
251	4	2	4	2	3
252	1	3	3	3	4
253	2	4	3	3	3
254	2	3	3	3	3
255	2	3	3	3	3
256	1	2	2	2	3
257	3	3	3	3	3
258	4	3	3	3	3
259	1	4	4	2	3
260	1	2	4	2	3
261	1	2	2	3	3
262	4	3	3	3	3
263	1	3	4	2	4
264	1	1	1	1	4
265	1	1	1	1	1
266	1	2	1	1	1
267	1	1	1	1	4
268	1	1	1	1	1
269	3	4	1	1	1
270	1	1	1	1	1
271	1	1	1	2	4
272	1	2	2	2	2
273	1	2	1	2	4
274	3	4	4	2	4
275	1	1	1	1	1
276	1	1	1	1	1
277	1	1	1	1	1
278	1	1	1	1	1
279	1	1	1	1	1
280	1	1	1	1	1
281	1	2	2	2	4
282	1	2	1	2	1
283	1	1	1	1	1
284	1	1	1	1	4
285	1	1	1	1	1
286	1	2	2	2	2
287	1	2	1	2	4
288	1	2	1	2	2
289	1	4	4	2	3
290	1	1	1	1	1
291	1	1	1	1	1
292	3	4	4	2	4
293	1	1	1	1	1
294	1	1	1	1	1
295	1	1	1	1	1
296	1	1	1	1	1
297	1	2	4	2	1
298	1	1	1	1	1
299	2	3	3	3	3
300	1	1	1	1	1
301	1	1	1	1	1
302	1	1	1	1	1
303	1	1	1	1	1
304	1	1	1	1	1
305	1	1	1	1	1
306	1	1	1	1	1
307	2	3	3	3	3
308	1	2	2	2	3
309	4	2	2	2	2
310	1	1	1	1	1
311	1	1	1	1	1
312	1	2	1	2	1
313	1	1	1	1	1
314	1	1	1	1	2
315	1	1	1	1	1
316	1	1	1	1	1
317	1	1	1	1	1
318	1	1	1	1	1
319	1	1	1	1	1
320	2	4	4	2	2
321	4	2	4	2	2
322	4	2	4	2	4
323	3	4	3	3	3
324	1	1	1	2	4
325	2	4	4	2	4
326	1	1	1	1	1
327	1	1	1	1	1
328	1	1	1	1	1
329	1	1	1	1	1
330	1	3	3	3	3
331	1	1	1	1	1
332	1	1	1	1	1
333	1	1	1	1	1
334	1	2	4	1	1
335	4	2	2	2	4
336	1	1	1	1	1
337	4	2	2	2	4
338	1	2	1	1	1
339	1	1	4	2	2
340	1	1	1	1	1
341	4	2	4	2	4
342	1	1	1	1	1
343	1	1	1	1	1
344	3	4	4	2	4
345	1	1	1	1	4
346	1	1	4	2	4
347	1	1	1	1	1
348	1	1	2	2	4
349	1	1	1	2	4
350	1	1	1	1	1
351	1	1	1	1	1
352	1	1	2	2	4
353	1	1	1	1	1
354	1	3	2	3	3
355	1	1	1	1	1
356	1	1	1	2	2
357	1	1	1	2	4
358	1	1	1	1	1
359	1	2	2	2	4
360	1	1	1	1	1
361	1	1	1	1	1
362	1	1	1	1	1
363	1	1	1	1	1
364	1	2	1	1	1
365	1	1	1	1	1
366	1	1	1	1	1
367	1	4	4	3	4
368	1	1	1	1	1
369	1	1	1	1	1
370	1	1	4	2	4
371	1	1	1	1	2
372	4	2	4	1	4
373	1	2	2	2	2
374	1	1	1	1	1
375	1	2	1	1	2
376	1	1	1	2	2
377	1	1	1	1	1
378	1	1	1	1	1
379	1	1	1	1	1
380	1	1	1	1	1
381	1	1	1	1	1
382	1	1	1	1	4
383	1	1	1	1	1
384	4	2	2	2	4
385	1	2	4	2	4
386	1	1	1	1	1
387	1	1	1	1	1
388	1	1	1	1	1
389	1	1	1	1	1
390	1	2	4	2	1
391	1	1	1	1	1
392	1	1	1	1	1
393	1	1	1	1	1
394	1	1	1	1	1
395	1	1	4	1	2
396	1	1	1	1	1
397	1	1	4	1	1
398	1	1	1	1	1
399	1	2	4	1	1
400	1	1	1	1	1
401	1	2	4	1	1
402	1	4	4	2	4
403	1	2	1	1	4
404	1	2	4	1	1
405	1	1	1	1	2
406	1	1	1	1	1
407	1	2	1	1	1
408	2	4	3	3	3
409	1	1	4	1	1
410	3	4	4	1	1
411	3	4	4	2	4
412	1	2	4	1	1
413	1	1	4	2	4
414	4	2	4	2	4
415	1	2	4	1	4
416	1	2	1	1	1
417	4	4	4	2	3
418	1	2	1	1	1
419	1	2	4	1	1
420	1	2	4	1	2
421	1	1	1	1	1
422	1	1	1	1	1
423	1	1	1	1	1
424	1	1	1	1	1
425	1	1	1	1	1
426	1	1	2	2	1
427	1	1	4	2	4
428	1	1	1	1	1
429	1	1	1	1	1
430	1	2	1	1	2
431	1	1	1	1	1
432	1	1	1	1	1
433	1	1	1	1	1
434	4	2	4	2	4
435	1	1	1	1	4
436	1	2	1	1	1
437	1	1	1	1	1
438	1	1	4	1	1
439	2	3	3	3	4
440	1	1	2	2	4
441	1	1	1	1	1
442	1	1	4	1	1
443	1	2	4	1	1
444	4	4	2	3	3
445	4	2	2	2	2
446	4	3	3	3	3
447	1	2	1	1	1
448	1	1	1	2	1
449	1	1	4	2	4
450	3	3	2	3	2
451	1	1	4	2	4
452	1	1	2	2	2
453	1	1	1	1	1
454	1	1	4	1	1
455	1	1	1	2	4
456	1	1	1	1	1
457	1	1	1	1	1
458	1	1	1	1	4
459	1	2	2	2	4
460	3	4	4	1	2
461	1	1	4	1	1
462	1	1	1	1	1
463	1	1	1	1	1
464	1	1	1	1	1
465	1	1	1	1	1
466	1	1	4	1	1
467	1	1	1	1	1
468	4	2	4	2	1
469	4	2	4	1	1
470	1	2	1	1	2
471	1	1	1	1	4
472	1	1	2	2	4
473	1	1	1	1	1
474	1	1	1	1	1
475	1	1	1	1	2
476	3	4	4	2	4
477	3	2	2	2	3
478	2	4	3	3	4
479	1	2	1	1	2
480	1	1	1	1	1
481	1	1	1	1	1
482	1	1	1	1	2
483	2	4	2	3	3
484	3	2	4	2	4
485	1	1	1	1	1
486	1	1	1	1	2
487	1	1	1	1	1
488	1	1	1	1	1
489	1	1	1	1	1
490	4	2	4	2	2
491	1	1	1	1	1
492	1	1	1	1	1
493	1	1	1	1	2
494	2	3	3	3	3
495	1	1	1	1	1
496	1	1	1	2	2
497	1	1	1	1	1
498	1	1	1	1	2
499	1	1	1	1	1
500	1	1	4	1	2
501	1	1	1	2	4
502	1	1	1	1	1
503	1	1	1	1	1
504	1	1	1	1	1
505	1	1	1	2	2
506	1	1	4	1	1
507	1	1	1	1	1
508	3	2	2	2	1
509	1	1	1	1	1
510	1	1	1	1	1
511	1	2	4	1	1
512	1	1	1	1	1
513	1	1	1	1	1
514	1	1	4	2	4
515	1	1	1	1	1
516	1	2	1	1	1
517	1	1	1	2	4
518	1	1	1	1	1
519	1	1	1	2	1
520	4	3	3	3	3
521	1	2	2	2	4
522	3	3	3	3	3
523	4	2	4	2	4
524	1	1	4	1	1
525	1	1	1	1	1
526	1	1	1	1	1
527	1	1	1	1	1
528	1	1	4	1	1
529	4	3	2	3	4
530	1	1	1	1	1
531	1	1	1	1	1
532	1	1	4	1	1
533	1	1	1	1	1
534	3	2	2	2	1
535	1	1	4	1	1
536	1	1	2	2	1
537	1	1	2	2	1
538	1	1	1	1	1
539	1	1	4	2	1
540	1	2	1	2	1
541	1	1	1	1	1
542	1	1	4	1	1
543	1	1	1	1	1
544	1	1	1	1	1
545	1	1	1	1	1
546	1	1	1	2	1
547	4	3	3	3	3
548	1	1	1	1	1
549	3	4	3	3	3
550	1	1	1	1	1
551	1	1	1	1	1
552	1	1	2	2	4
553	1	2	2	2	4
554	1	2	2	2	3
555	1	1	1	1	1
556	1	1	1	2	4
557	1	1	1	1	1
558	3	3	3	3	4
559	1	1	1	1	1
560	1	1	1	1	1
561	1	1	1	2	4
562	1	1	1	1	1
563	1	1	1	1	1
564	1	1	1	1	1
565	1	2	4	2	4
566	1	1	1	1	1
567	1	1	1	1	2
568	1	1	1	1	2
569	1	1	1	1	2
570	4	2	2	2	2
571	1	1	1	1	4
572	3	3	3	3	3
573	3	4	4	2	3
574	2	3	3	3	3
575	1	1	4	2	2
576	1	1	1	2	4
577	1	1	1	2	1
578	1	1	1	1	1
579	1	1	1	1	1
580	1	1	1	1	2
581	1	1	1	1	1
582	1	1	1	1	1
583	4	3	2	3	3
584	1	2	1	1	1
585	4	2	4	1	1
586	1	1	1	1	1
587	1	1	1	1	1
588	1	1	1	1	2
589	1	1	1	1	1
590	1	1	1	1	1
591	4	2	1	1	1
592	1	1	1	1	1
593	1	1	1	1	1
594	1	1	1	1	1
595	1	1	1	1	1
596	1	1	1	1	1
597	1	1	1	1	1
598	1	1	1	1	2
599	1	1	1	1	1
600	1	1	1	1	1
601	1	1	1	1	1
602	1	1	1	1	1
603	1	1	1	1	1
604	1	1	1	1	1
605	1	1	1	1	1
606	1	1	1	1	1
607	1	1	1	1	2
608	1	1	1	2	1
609	1	1	1	1	1
610	1	1	1	1	1
611	1	1	1	1	1
612	1	1	1	1	1
613	4	3	3	3	3
614	3	3	3	3	3
615	2	3	3	3	3
616	1	1	1	1	1
617	1	4	4	1	1
618	1	1	2	2	4
619	1	2	1	1	4
620	1	2	4	1	1
621	1	2	2	2	4
622	4	2	3	3	3
623	2	3	3	3	3
624	1	1	1	1	1
625	1	2	2	2	4
626	1	3	3	3	4
627	3	4	4	3	4
628	3	1	1	1	4
629	4	2	4	1	1
630	1	1	1	2	1
631	4	2	2	3	4
632	3	4	4	2	4
633	1	1	4	1	1
634	1	1	1	1	1
635	1	2	4	1	4
636	1	1	1	1	1
637	1	1	1	1	1
638	1	1	4	1	4
639	4	2	2	2	4
640	4	3	3	3	3
641	1	1	4	1	4
642	3	4	4	1	4
643	4	2	4	2	4
644	1	2	4	1	1
645	1	1	1	1	1
646	1	1	1	1	2
647	2	3	3	3	3
648	4	2	4	1	1
649	1	1	4	1	1
650	1	2	1	1	1
651	1	2	4	1	4
652	1	1	1	1	1
653	1	2	2	3	3
654	4	3	2	3	3
655	2	3	3	3	3
656	1	2	1	1	4
657	1	2	4	1	4
658	1	1	4	1	2
659	1	2	2	2	4
660	1	2	4	2	4
661	1	2	2	2	4
662	1	1	4	1	1
663	4	2	4	1	1
664	4	2	4	1	4
665	1	1	4	1	1
666	1	1	1	1	2
667	1	1	1	1	1
668	3	2	4	1	4
669	1	1	4	1	1
670	1	1	1	2	2
671	1	1	1	1	1
672	3	4	4	2	4
673	1	2	2	2	4
674	1	1	1	1	1
675	2	3	3	3	3
676	3	4	3	3	3
677	2	3	3	3	3
678	3	4	4	2	3
679	1	1	2	2	2
680	1	1	4	2	3
681	1	3	3	2	4
682	1	2	4	1	4
683	1	2	4	2	3
684	1	4	3	3	3
685	1	1	1	1	1
686	1	1	1	1	1
687	1	3	3	3	3
688	3	3	3	3	3
689	1	1	1	2	2
690	1	1	1	2	2
691	1	2	2	2	3
692	1	1	1	1	2
693	1	2	1	1	2
694	3	4	4	2	2
695	1	1	1	1	1
696	1	2	1	1	1
697	1	1	1	1	1
698	4	3	3	3	3
699	1	2	2	1	1
700	1	1	1	1	1
701	3	4	3	2	3
702	1	1	1	1	1
703	1	1	1	1	2
704	1	2	2	2	3
705	1	1	1	1	2
706	3	4	4	2	3
707	1	1	1	1	1
708	1	1	1	1	1
709	1	1	1	1	1
710	1	1	1	1	1
711	1	1	1	1	1
712	1	1	1	1	1
713	1	1	1	1	1
714	1	1	1	1	1
715	1	1	1	1	1
716	2	4	3	3	3
717	1	1	4	2	1
718	1	1	4	1	1
719	4	2	4	2	4
720	1	1	1	1	1
721	1	1	4	2	4
722	1	4	4	2	4
723	1	2	2	2	4
724	1	1	4	1	4
725	1	1	1	1	1
726	1	2	1	1	1
727	1	1	1	1	1
728	1	2	1	1	1
729	1	1	1	1	1
730	1	1	1	1	1
731	3	4	3	3	4
732	4	3	2	3	3
733	1	1	4	1	1
734	1	1	1	1	1
735	4	2	4	2	4
736	1	1	1	1	1
737	1	1	1	1	1
738	1	1	4	1	1
739	3	4	4	2	4
740	1	2	2	2	4
741	1	2	4	1	1
742	1	1	1	1	1
743	1	2	4	1	1
744	3	4	4	1	1
745	1	1	4	2	4
746	1	2	4	1	1
747	4	3	3	3	3
748	1	2	4	2	4
749	1	2	1	1	1
750	1	1	4	2	1
751	1	1	1	1	1
752	4	2	4	2	4
753	1	1	1	1	1
754	3	4	4	2	4
755	3	4	4	2	1
756	3	4	4	2	1
757	1	2	4	1	1
758	4	2	4	2	4
759	1	2	1	1	1
760	1	1	4	1	1
761	3	4	4	2	4
762	1	2	4	1	1
763	1	1	1	1	1
764	1	2	2	2	2
765	1	3	3	2	3
766	1	2	1	1	1
767	3	4	4	1	1
768	1	2	1	1	4
769	2	3	3	3	3
770	1	1	1	2	4
771	4	2	2	3	4
772	1	2	2	3	3
773	1	2	4	1	1
774	1	1	1	1	1
775	1	1	1	1	1
776	1	1	2	2	4
777	1	1	1	1	1
778	1	4	4	2	3
779	1	1	2	2	2
780	2	4	4	2	2
781	1	1	1	1	1
782	1	1	1	1	1
783	4	2	2	2	4
784	1	1	1	1	4
785	1	1	1	1	2
786	1	1	1	1	1
787	1	1	4	1	2
788	1	1	1	1	4
789	1	1	1	1	1
790	4	2	4	1	1
791	1	2	2	2	3
792	4	2	4	1	1
793	1	2	2	1	4
794	1	1	4	2	4
795	1	1	1	2	1
796	3	4	4	2	4
797	1	1	1	1	1
798	1	1	1	1	2
799	1	1	1	1	1
800	1	1	1	1	1
801	1	1	1	1	1
802	1	1	1	1	1
803	1	1	1	1	1
804	1	1	1	1	1
805	1	1	1	1	1
806	1	1	1	1	1
807	1	1	1	1	1
808	3	1	1	2	4
809	4	2	4	2	4
810	3	2	2	2	2
811	1	1	1	1	1
812	4	2	2	3	3
813	4	2	2	1	4
814	1	1	4	1	1
815	1	1	1	1	1
816	1	1	1	1	1
817	1	1	1	1	1
818	1	3	2	3	4
819	1	1	1	1	1
820	1	2	4	1	1
821	1	1	2	2	1
822	2	3	3	3	4
823	1	1	1	1	1
824	1	1	1	1	1
825	1	1	1	1	1
826	3	4	4	2	4
827	1	1	1	1	4
828	1	1	2	1	1
829	1	1	1	1	1
830	1	1	1	1	1
831	4	2	4	2	4
832	1	4	4	2	4
833	1	1	1	1	1
834	3	3	3	3	4
835	3	4	1	2	4
836	2	4	4	2	1
837	3	1	4	1	1
838	2	4	4	2	1
839	4	3	2	2	4
840	1	1	1	1	1
841	1	1	1	1	1
842	1	1	2	2	4
843	1	1	1	1	4
844	3	4	4	2	4
845	2	3	3	3	3
846	3	3	3	3	3
847	4	3	3	3	4
848	1	1	1	1	1
849	1	1	2	2	4
850	1	2	2	2	4
851	4	2	4	1	1
852	1	2	4	2	4
853	3	4	4	2	1
854	1	4	3	3	3
855	1	2	2	1	4
856	1	1	4	1	2
857	1	1	4	1	1
858	1	2	2	2	4
859	2	3	3	3	3
860	4	2	4	2	4
861	1	1	4	1	1
862	1	2	4	2	4
863	4	2	4	2	4
864	4	2	4	1	4
865	4	2	4	2	4
866	3	4	4	2	4
867	1	2	2	2	4
868	1	2	4	2	4
869	1	2	2	2	4
870	1	2	2	2	4
871	3	2	4	2	3
872	1	2	2	2	4
873	1	2	1	1	1
874	1	2	4	1	4
875	1	2	4	2	4
876	1	2	4	2	4
877	1	2	1	1	1
878	1	2	1	1	1
879	2	3	3	3	3
880	1	2	4	1	1
881	1	1	1	1	1
882	1	2	1	1	1
883	1	2	4	2	3
884	1	2	2	2	3
885	1	2	4	1	1
886	1	2	1	1	1
887	1	2	4	1	4
888	1	1	1	2	4
889	1	2	1	1	1
890	1	1	1	2	2
891	1	2	1	1	1
892	1	3	3	3	3
893	1	2	2	2	2
894	1	1	1	1	1
895	1	1	1	1	1
896	1	1	1	1	1
897	1	1	1	1	1
898	1	1	1	1	1
899	1	1	1	1	2
900	1	1	1	1	1
901	1	1	1	1	1
902	1	1	1	1	1
903	1	1	1	1	1
904	1	1	1	1	1
905	1	1	1	1	1
906	1	1	4	1	1
907	1	1	1	1	1
908	1	1	1	1	1
909	1	1	1	2	1
910	1	1	1	1	1
911	1	2	2	1	1
912	1	1	1	1	1
913	1	2	1	1	1
914	1	1	1	1	1
915	1	1	1	1	1
916	1	1	1	1	1
917	1	1	1	1	2
918	1	2	1	1	1
919	1	1	1	1	1
920	1	1	1	1	1
921	3	4	4	1	1
922	3	4	4	2	2
923	1	1	1	1	1
924	1	1	4	2	2
925	3	2	4	1	1
926	1	1	1	1	1
927	1	2	4	1	1
928	1	2	4	1	1
929	1	2	2	3	3
930	1	1	4	1	1
931	3	4	4	1	1
932	1	2	1	1	2
933	1	2	4	1	1
934	3	4	4	1	2
935	1	2	4	1	1
936	2	3	3	3	3
937	1	3	2	2	4
938	2	3	3	3	3
939	2	3	3	3	3
940	2	3	3	3	3
941	4	3	4	2	4
942	3	4	3	2	3
943	4	3	4	2	4
944	1	2	4	1	1
945	1	2	4	1	1
946	1	2	2	2	4
947	1	2	4	1	1
948	1	2	4	1	1
949	1	1	4	2	1
950	4	2	2	2	4
951	3	4	4	1	1
952	3	4	3	3	4
953	1	1	1	1	1
954	1	1	1	2	4
955	3	4	4	2	1
956	1	1	1	1	1
957	1	2	2	2	4
958	3	4	4	2	4
959	1	1	1	1	1
960	1	1	4	1	1
961	4	2	4	2	4
962	1	1	1	1	1
963	1	2	1	1	1
964	1	2	4	1	1
965	1	2	4	1	1
966	1	2	4	1	1
967	4	2	4	1	4
968	1	1	1	1	1
969	1	1	1	2	1
970	1	1	1	1	1
971	1	1	4	1	1
972	1	1	1	1	1
973	1	1	1	1	1
974	1	2	1	1	1
975	1	1	1	1	1
976	1	1	4	1	4
977	1	1	1	1	1
978	1	2	4	2	4
979	1	2	2	1	4
980	1	2	4	1	1
981	1	1	4	1	2
982	1	1	2	2	4
983	3	1	4	1	1
984	1	1	1	1	1
985	1	1	1	1	1
986	3	4	4	2	1
987	3	1	4	1	2
988	1	1	1	1	1
989	1	1	1	1	1
990	1	1	1	1	1
991	1	1	1	1	1
992	1	1	1	1	1
993	1	1	1	1	1
994	1	1	1	1	1
995	1	1	1	1	1
996	1	1	1	1	1
997	1	1	1	1	2
998	1	1	1	1	1
999	1	2	1	1	1
1000	1	1	1	1	1
1001	1	1	1	1	1
1002	1	1	1	1	1
1003	1	1	1	1	2
1004	1	1	1	1	1
1005	1	1	1	1	1
1006	4	3	2	3	4
1007	1	1	1	1	1
1008	1	1	1	1	1
1009	3	4	4	2	2
1010	1	1	1	1	1
1011	1	1	1	1	1
1012	1	1	1	1	1
1013	1	1	1	1	1
1014	1	1	1	1	1
1015	1	1	1	1	1
1016	1	1	1	1	4
1017	1	1	1	1	1
1018	1	1	1	1	1
1019	1	1	1	1	1
1020	2	3	3	3	3
1021	1	1	4	1	1
1022	1	2	2	2	1
1023	4	2	4	1	1
1024	1	2	1	1	1
1025	1	1	1	1	1
1026	3	4	4	2	4
1027	2	4	3	3	4
1028	1	1	1	1	1
1029	1	1	1	1	1
1030	1	1	4	1	1
1031	1	1	2	1	1
1032	3	2	4	1	1
1033	1	2	1	2	4
1034	1	1	1	1	1
1035	1	2	2	1	1
1036	1	1	1	1	1
1037	1	1	4	1	1
1038	1	1	1	1	1
1039	4	2	4	1	1
1040	1	1	1	1	1
1041	1	1	1	1	1
1042	1	2	4	1	1
1043	3	2	4	1	1
1044	1	1	1	1	1
1045	1	2	2	1	1
1046	1	2	1	1	1
1047	1	1	1	1	1
1048	3	4	4	1	1
1049	1	1	1	1	4
1050	1	1	2	2	4
1051	3	4	4	1	1
1052	1	1	1	1	1
1053	3	4	4	1	1
1054	1	1	1	1	1
1055	2	4	4	2	4
1056	1	2	2	2	4
1057	1	1	4	1	1
1058	1	2	2	3	3
1059	4	2	4	1	1
1060	3	4	4	2	1
1061	1	2	2	2	4
1062	1	1	1	1	1
1063	4	2	4	2	4
1064	1	1	1	1	1
1065	3	4	3	3	3
1066	1	1	1	2	4
1067	3	4	4	2	1
1068	4	3	3	3	4
1069	1	1	2	2	4
1070	3	3	3	3	3
1071	1	1	4	2	4
1072	1	1	1	1	2
1073	4	2	2	3	3
1074	1	3	2	2	4
1075	1	1	1	1	1
1076	4	2	4	1	4
1077	1	1	4	1	1
1078	2	3	3	3	3
1079	1	1	4	2	3
1080	1	1	1	1	1
1081	1	2	2	1	2
1082	1	1	1	1	1
1083	1	1	1	2	2
1084	3	3	3	3	3
1085	1	4	3	3	3
1086	1	1	1	2	4
1087	2	3	3	3	3
1088	1	2	4	2	2
1089	1	1	1	1	1
1090	1	2	1	1	4
1091	2	3	3	3	3
1092	3	4	4	2	4
1093	1	1	4	1	1
1094	1	1	1	1	4
1095	1	1	1	1	2
1096	1	1	1	1	2
1097	4	2	4	1	4
1098	1	1	1	1	1
1099	1	1	1	1	2
1100	4	2	4	1	1
1101	1	1	1	2	3
1102	4	2	2	1	4
1103	1	1	1	1	4
1104	2	3	3	3	3
1105	1	1	1	1	1
1106	1	2	1	1	1
1107	3	1	1	1	1
1108	1	1	1	1	1
1109	3	4	1	1	1
1110	1	1	1	1	1
1111	1	1	2	2	2
1112	1	1	1	1	1
1113	1	1	1	2	2
1114	1	1	1	1	2
1115	1	1	1	1	4
1116	1	1	1	1	2
1117	1	3	2	3	3
1118	1	2	2	2	2
1119	1	1	1	1	1
1120	1	1	1	1	2
1121	4	2	1	1	1
1122	2	3	3	3	3
1123	1	1	1	1	1
1124	2	3	3	3	3
1125	1	1	1	1	1
1126	1	1	1	1	1
1127	1	1	1	1	4
1128	1	1	1	1	1
1129	1	2	2	2	4
1130	1	1	4	2	2
1131	1	1	4	1	1
1132	1	1	1	1	1
1133	2	3	4	2	4
1134	1	1	1	1	1
1135	1	1	1	1	1
1136	1	1	1	1	1
1137	1	1	1	1	1
1138	1	1	1	1	1
1139	1	3	3	2	4
1140	1	1	1	1	1
1141	1	1	1	1	1
1142	1	1	1	2	1
1143	4	2	4	2	2
1144	3	1	4	2	4
1145	1	1	1	1	1
1146	2	3	3	3	4
1147	4	3	2	3	4
1148	1	2	4	1	1
1149	3	4	4	1	4
1150	4	3	3	2	4
1151	1	1	1	1	1
1152	1	1	1	1	1
1153	4	2	4	2	3
1154	1	2	4	1	1
1155	1	1	1	2	1
1156	1	2	1	1	1
1157	1	1	1	1	1
1158	1	1	1	1	1
1159	1	2	4	3	4
1160	1	1	1	2	1
1161	1	1	1	1	1
1162	2	3	3	3	3
1163	3	3	3	3	3
1164	2	3	3	3	3
1165	1	2	2	1	4
1166	1	1	1	1	1
1167	1	2	2	3	4
1168	4	3	3	3	3
1169	1	1	1	1	1
1170	1	2	2	2	2
1171	1	1	4	2	4
1172	1	1	1	1	1
1173	1	1	1	2	4
1174	1	2	2	2	4
1175	1	1	1	1	1
1176	1	2	2	3	3
1177	4	2	4	2	2
1178	1	2	1	2	1
1179	1	1	1	1	4
1180	1	1	1	1	2
1181	1	1	1	1	2
1182	1	1	1	1	2
1183	1	1	1	1	1
1184	2	4	4	2	4
1185	1	1	1	2	4
1186	1	1	1	1	2
1187	1	1	1	1	2
1188	4	2	4	2	4
1189	1	1	1	1	2
1190	1	1	1	1	1
1191	4	4	3	3	3
1192	1	1	1	1	2
1193	1	1	1	1	1
1194	1	1	1	2	1
1195	4	2	2	1	2
1196	4	2	4	1	1
1197	1	1	1	1	1
1198	1	1	1	1	1
1199	1	1	1	2	2
1200	1	1	1	1	2
1201	1	1	1	1	2
1202	1	2	2	2	2
1203	1	1	1	1	2
1204	1	1	1	1	1
1205	1	2	1	1	2
1206	1	1	1	1	1
1207	1	1	4	1	2
1208	1	1	1	1	2
1209	1	1	1	1	1
1210	1	2	1	1	2
1211	1	1	1	1	1
1212	1	1	1	1	1
1213	1	1	1	1	1
1214	1	1	1	1	1
1215	1	1	1	1	1
1216	1	1	1	1	1
1217	1	1	1	1	1
1218	1	1	1	1	1
1219	3	4	2	2	2
1220	1	2	1	1	1
1221	1	1	1	1	2
1222	1	1	1	1	1
1223	1	1	1	1	1
1224	1	1	1	2	1
1225	1	2	2	1	2
1226	1	1	1	2	1
1227	1	2	4	1	1
1228	3	3	3	3	3
1229	1	2	2	2	2
1230	1	2	2	1	4
1231	1	1	1	1	2
1232	1	2	1	1	1
1233	1	1	1	1	1
1234	1	1	1	1	1
1235	1	2	2	2	4
1236	1	2	1	1	1
1237	4	2	3	2	4
1238	4	4	2	3	4
1239	1	2	1	1	1
1240	1	1	1	1	1
1241	1	2	1	1	1
1242	1	2	1	1	1
1243	1	1	2	2	4
1244	1	1	1	1	1
1245	1	1	1	1	1
1246	3	4	4	2	4
1247	4	3	3	2	4
1248	1	2	2	1	4
1249	1	1	2	1	1
1250	4	2	2	3	4
1251	3	3	2	3	4
1252	1	2	3	3	3
1253	1	3	2	3	4
1254	1	1	1	1	1
1255	1	2	2	2	4
1256	1	1	1	1	1
1257	1	1	1	1	1
1258	1	1	1	1	1
1259	2	4	3	3	3
1260	1	3	3	3	3
1261	1	2	4	2	2
1262	1	1	1	2	2
1263	2	3	3	3	3
1264	4	3	3	3	3
1265	4	3	2	3	3
1266	1	1	1	2	2
1267	1	1	4	2	4
1268	1	2	4	1	1
1269	1	1	4	1	4
1270	1	1	1	1	1
1271	1	1	1	1	4
1272	1	1	1	2	4
1273	1	1	1	2	2
1274	1	1	1	1	1
