# Supplementary material for: Predicting the past and future evolutionary space of SARS-CoV-2
Source: Research Square preprint supplement (doi:10.21203/rs.3.rs-3195284/v1), 2023-08-14
Supplement: Supplementary file 3 [file e0136f659023ebd1a0e0ecdc.docx]

Figure S1. Skewness value (y-axis) plotted against W value (x-axis) for each amino site in each month. Individual amino acids are shown by a dot. Colored dots indicated in the key are amino acids associated are associated with the respective VoC. Amino acids that are shared by the different VoCs are indicated in yellow.

Figure S2. W value (y-axis) of each amino acid site (x-axis) from N-terminal to C-terminal end along the spike protein by month and year of the COVID-19 pandemic indicated to the top left.
