# Supplementary material for: Predicting the past and future evolutionary space of SARS-CoV-2
Source: Research Square preprint supplement (doi:10.21203/rs.3.rs-3195284/v1), 2023-08-14
Supplement: Supplementary file 4 [file f08f0c30e27dcf37c2c23b5a.docx]

**Data overview**

During the COVID-19 pandemic COG-UK[[1]](#footnote-1) collected and sequenced SARS-CoV-2 genomes in the UK. To date, this project has sequenced over 2,600,000 SARS-CoV-2 genomes. The sequencing data is currently freely available at the NCBI SRA database. In this study, SARS-CoV-2 sequence data was sampled from every day from different sites in the UK. We selected viral genomes that were amplified using ARTIC primers and sequenced in paired-end mode on the Illumina NovaSeq 6000 platform. We randomly selected 100 samples per day (if available) with a fastq size larger than 100 Mb, spanning from March 2020 to December 2022. A total of 96,558 samples were used for analysis (Supplementary Table 4). After removing the samples with consensus genome covering less 90% of the coding region (see methods), 96,209 samples were used for amino acid variation analysis (Supplementary Table 5). Such large sample sets would provide sufficient information to depict the evolution of SARS-CoV-2 genomes from the start of the pandemic in UK. Consensus genomes and major amino acid changes in England have been analyzed by Vöhringer et al.1 with the COG-UK SARS-CoV-2 genome sequencing data. However, consensus genomes and major amino acid changes only display the results of virus evolution. Amino acid variation frequencies, especially the minor amino acid variation frequencies, can reveal the evolutionary process of SARS-CoV-2 and the emergence of minor genomic variants as dominant sequence.

**Sequencing bias**

In this study, we monitored the amino acid variation frequencies from March 2020 to December 2022 through each month. The average variation frequencies of each amino acid position along the viral genome/proteome were calculated to investigate the mutation emergence in the spike protein over the three years. Amplicon sequencing could introduce low-frequency genetic variants due to errors acquired during PCR/RT-PCR and Illumina sequencing2. These low-frequency genetic variants may result in overestimation of amino acid variation frequency. The average variation frequencies of each amino acid were plotted along the spike protein by month in 2020, 2021 and 2022, respectively (Extended Data Fig. 1B and C). The amino acid variation frequencies showed periodic recurrence (Extended Data Fig. 1B and C). Each wave is situated between a paired primer pair and peaked in the middle of the amplicon (Extended Data Fig. 1B and C). SARS-CoV-2 genomes were amplified using ARTIC primers version 3 from March 2020 to 15th October 2021 and ARTIC primers version 4 from 16th October 2020 to 31st December 2022. ARTIC primers versions 3 and 4 amplify different regions of the SARS-CoV-2 genome that are in accordance with periodic recurrences in the spike protein (Extended Data Fig. 1B and C). Hence, these periodic recurrences were likely a result of Illumina associated sequencing error, even though our analysis pipeline had included an Illumina sequencing error reduction algorithm (see method). ARTIC primers produced amplicons of approximately 390 nucleotides. Illumina sequenced each amplicon from both sides, resulting in read lengths of 220 bp for R1 and 200 bp for R2 in the COG-UK datasets. Illumina sequencing error rates increased towards the end of each read3 and would cause the average variation frequencies of each amino acid to peak in the middle of the amplicon (intersection of R1 and R2 ends). Although the overall error rates of Illumina sequencing were very low, the sequencing error would accumulate at same places in the amplicons (approximately 0.06 in the peak region as showed on Extended Data Fig. 1B and C) because of repeated sequencing of same amplicon. The average variation frequencies of each amino acid showed the same periodic error pattern in different months (Extended Data Fig. 1B and C) and indicated the Illumina sequencing and PCR/RT-PCR error rates were almost identical with same ARTIC primers version at same nucleotide site and subsequent amino acid site in different samples. Therefore, if the samples have been amplified by the same ARTIC primers version, comparing the average variation frequencies of amino acids at the same site in different months would reveal real differences in frequencies of amino acid changes.

**Mutation prediction**

The W value is also referred to as the Shapiro-Wilk statistic W (W for Wilk) and its range is 0 and 14. Samples with a normal distribution of error will result in W with a high value and samples deviating away from a normal distribution will have a lower value of W. As discussed above, the Illumina sequencing and PCR/RT-PCR error rates are almost identical at the same amino acid site in different samples. Based on the Central Limit Theorem 5, if the error rate does not change and the number of independent measurements increases, the probability density of the measured error rates tends to follow a normal distribution with a mean close to the true error rate. We analyzed about 3,000 independent samples per month, and measured the variation frequency at each amino acid site across the viral genome/proteome. If we assume that the virus was not subjected to any evolutionary forces, the observed variations at amino acid sites would be a result of errors acquired during PCR/RT-PCR and Illumina sequencing. The frequencies of variations at an amino acid site in monthly samples should exhibit symmetry around their mean and display an approximate normal distribution if no external forces such as selection are acting on them (as shown in Fig. 3A, blue curve). An amino acid with a normal distribution like variation frequency would have high W value. Viral populations evolve by the action of mutation are subject to evolutionary forces, including random genetic drift, selection, transmission and population bottlenecks6,7. Viruses under these evolutionary forces, especially natural selection, would result in increased frequencies of variations in some individuals (samples) at an amino acid site. This would increase the thickness of the right tail, generating right-skewed distributions (as shown in Fig. 3A, green curve). An amino acid with a right-skewed distribution of variation frequency would have a lower W value. Some evolutionary forces are strong enough to result in increased frequencies of variations in many individuals (samples) at an amino acid site. This would increase the density of higher variation frequencies, generating left-skewed distribution (as shown in Fig. 3A, red curve). An amino acid with a left-skewed distribution of variation frequency would also have a lower W value.

The W value was plotted against the average variation frequency for each amino site in each month (Extended Data Fig. 5 and 6). Two separated clusters can be observed throughout all the months analyzed, with one having a higher W value (closed to 1) than the other (Extended Data Fig. 5 and 6). Skewness is a measure of the asymmetry of the probability distribution 4. A positive skewness value indicates a right-skewed distribution, while a negative skewness value indicates a left-skewed distribution. The amino sites with low W also exhibited high positive skewness values have right-skewed distributions (Fig. S1). The mutation sites from alpha, delta and omicron observed high negative skewness values had left-skewed distribution after fixed in the population (Fig. S1).

Periodic recurrence, as shown in Extended Data Fig. 1B and C, was not observed in the average variation frequencies of W values (Fig. S2). Therefore, the W value is relatively unbiased and can serve as a reliable variable for machine learning.

**References**

1 Vöhringer, H. S. *et al.* Genomic reconstruction of the SARS-CoV-2 epidemic in England. *Nature* **600**, 506-511 (2021).

2 Guenay-Greunke, Y., Bohan, D. A., Traugott, M. & Wallinger, C. Handling of targeted amplicon sequencing data focusing on index hopping and demultiplexing using a nested metabarcoding approach in ecology. *Scientific reports* **11**, 19510 (2021).

3 Schirmer, M., D’Amore, R., Ijaz, U. Z., Hall, N. & Quince, C. Illumina error profiles: resolving fine-scale variation in metagenomic sequencing data. *BMC bioinformatics* **17**, 1-15 (2016).

4 Royston, J. P. An extension of Shapiro and Wilk's W test for normality to large samples. *Journal of the Royal Statistical Society: Series C (Applied Statistics)* **31**, 115-124 (1982).

5 Kwak, S. G. & Kim, J. H. Central limit theorem: the cornerstone of modern statistics. *Korean journal of anesthesiology* **70**, 144-156 (2017).

6 Lynch, M. *et al.* Genetic drift, selection and the evolution of the mutation rate. *Nature Reviews Genetics* **17**, 704-714 (2016).

7 Spielman, S. J. *et al.* Evolution of viral genomes: Interplay between selection, recombination, and other forces. *Evolutionary Genomics: Statistical and Computational Methods*, 427-468 (2019).

1. https://webarchive.nationalarchives.gov.uk/ukgwa/20230505083137/https://www.cogconsortium.uk/ [↑](#footnote-ref-1)
